# Supplementary material for: Synthesis and characterization of enantiopure chiral NH2/SO palladium complexes
Source: Royal Society of Chemistry journal article supplement (doi:10.1039/d3ob00816a), 2023-01-01
Supplement: d3ob00816a1.pdf [file d3ob00816a1.pdf]

## Synthesis and Characterization of Enantiopure Chiral NH<sub>2</sub>/SO Palladium Complexes

Nazaret Moreno,<sup>1</sup> L. Gabriel Borrego,<sup>1</sup> Rocío Recio,<sup>1\*</sup> Victoria Valdivia,<sup>1</sup> Carmen Nicasio,<sup>2</sup> Eleuterio Álvarez,<sup>3</sup> Nouredine Khiar<sup>3</sup> and Inmaculada Fernández<sup>1\*</sup>

<sup>1</sup> Departamento de Química Orgánica y Farmacéutica, Facultad de Farmacia, Universidad de Sevilla. C/ Profesor García González, 2, 41012 Sevilla, Spain.

<sup>2</sup> Departamento de Química Inorgánica, Universidad de Sevilla, Apto 1203, Sevilla, 41071, Spain.

<sup>3</sup> Instituto de Investigaciones Químicas, Universidad de Sevilla-CSIC. Avda. Américo Vespucio, 49, 41092 Sevilla, Spain.

inmaff@us.es

### Supporting Information

#### Table of contents

|                                                                    |             |
|--------------------------------------------------------------------|-------------|
| <b>Experimental data of enantiopure methylsulfoxides</b>           | <b>S2</b>   |
| <b>Experimental data of <i>N</i>-Sulfinylimines</b>                | <b>S4</b>   |
| <b>Experimental data of sulfinamide/sulfoxide ligands</b>          | <b>S5</b>   |
| <b>Experimental data of sulfinamide/sulfone ligands</b>            | <b>S9</b>   |
| <b>Experimental data of Pd complexes</b>                           | <b>S9</b>   |
| <b>Experimental data of amine/sulfoxide ligands.</b>               | <b>S13</b>  |
| <b>Experimental data of acetamide/sulfoxide ligands.</b>           | <b>S15</b>  |
| <b>Experimental data of Pd(II) asymmetric catalysis.</b>           | <b>S17</b>  |
| <b><sup>1</sup>H-NMR, <sup>13</sup>C-NMR of selected compounds</b> | <b>S19</b>  |
| <b>X-ray Structural Analysis for the compounds of this work.</b>   | <b>S111</b> |
| <b>X-ray structure determination of selected ligands</b>           | <b>S112</b> |
| <b>X-ray structure determination of selected complexes</b>         | <b>S124</b> |
| <b>References</b>                                                  | <b>S132</b> |

## Experimental data

### General procedures

All reactions were run under an atmosphere of dry argon using oven dried glassware and dried solvents. Toluene, THF, CH<sub>2</sub>Cl<sub>2</sub> and diethyl ether were dried using molecular sieves, and highest quality solvents were used. Chemicals were obtained from commercial sources and were used without further purification. TLC was carried out on silica gel GF254 (Merck), and compounds were detected by charring with phosphomolybdic acid/EtOH. For flash chromatography, Merck 230–400 mesh silica gel was used. Chromatographic columns were eluted with a positive pressure of air, and eluents are given as volume to volume ratios (v/v). NMR spectra were recorded with Bruker Avance 300 and 500 MHz spectrometers. Chemical shifts are reported in ppm, and coupling constants are reported in Hz. Routine <sup>1</sup>H and <sup>13</sup>C spectra were referenced to the residual proton or carbon signals of the solvent, respectively. High-resolution mass spectra (HRMS) were recorded with a Kratos MS-80RFA 241-MC apparatus. Optical rotations were determined with a Perkin–Elmer 341 polarimeter. Melting points were measured with a Stuart SMP3 apparatus in open-ended capillary tubes.

### Stereoselective synthesis of methylsulfoxides<sup>1</sup>

#### *Methyl sulfinyl chloride, 35*

To a solution of dimethyl disulfide (8.9 mL, 0.1 mol, 100 mol%) and glacial acetic acid (11.4 mL, 0.2 mol, 200 mol%), sulfuryl chloride (25.7 mL, 0.31 mol, 310 mol%) was added dropwise at -40 °C. The resulting mixture was stirred for 2 h at -20 °C, 2 h at rt and 1 h at 35 °C. Then, the solvent was evaporated and the desired compound was obtained as a yellow oil with no further purification (9.1 g, 92.34 mmol, 92% yield); b.p.: 55 °C; <sup>1</sup>H-NMR (300 MHz, CDCl<sub>3</sub>): δ 3.38 (s, 3H) ppm.

#### *1,2:5,6-Di-O-isopropylidene-α-D-glucofuranosyl (-)-(S)-Methanesulfinate, 1(S<sub>S</sub>)*

To a solution of 1,2:5,6-di-O-isopropylidene-α-D-glucofuranose (DAGOH) (2.5 g, 9.6 mmol, 100 mol%) and diisopropylethyl amine (2.7 mL, 15.36 mmol, 160 mol%) in a mixture of dry toluene (150 mL) and dry methylene chloride (2 mL) under argon atmosphere, at -78 °C, a solution of methyl sulfinyl chloride, **35** (0.8 mL, 12.49 mmol, 130 mol%) was added dropwise with vigorous stirring. The reaction was stirred for 1 h at -78 °C, then HCl (10 % aq.) was added, and the aqueous phase was extracted with CH<sub>2</sub>Cl<sub>2</sub> (3x60 mL). The combined organic phases were washed with saturated aqueous NaHCO<sub>3</sub> solution and saturated aqueous NaCl solution and dried with anhydrous Na<sub>2</sub>SO<sub>4</sub>. The solvent was removed under vacuum to give sulfinate **1(S<sub>S</sub>)** in a 98% d.e. It was purified by recrystallization in hexane to obtain diastereomerically pure sulfinate **1(S<sub>S</sub>)** (2.8 g, 8.64 mmol, 90% yield) as a white solid; mp 92–94 °C; [α]<sub>D</sub><sup>20</sup>: -200 (c 1, acetone); <sup>1</sup>H-NMR (500 MHz, CDCl<sub>3</sub>): δ 5.91 (d, *J* = 3.7 Hz, 1H), 4.77 (d, *J* = 2.4 Hz, 1H), 4.61 (d, *J* = 3.6 Hz, 1H), 4.27–4.24 (m, 1H), 4.11–4.09 (m, 1H), 4.02–4.00 (m, 1H), 2.69 (s, 3H), 1.51, 1.42, 1.33, 1.30 (4s, 12H) ppm; <sup>13</sup>C-NMR (125 MHz, CDCl<sub>3</sub>): δ 112.6, 109.4,

105.2, 83.9, 80.4, 78.4, 72.4, 67.0, 44.4, 26.9, 26.8, 26.4, 25.3 ppm; HRMS (ESI) m/z: [M+Na]<sup>+</sup> Calcd for C<sub>13</sub>H<sub>22</sub>O<sub>7</sub>NaS 345.0978; found 345.0976.

*1,2:5,6-Di-O-isopropylidene- $\alpha$ -D-glucofuranosyl (+)-(R)-Methanesulfinate, **1(R<sub>S</sub>)***

To a solution of DAGOH (2 g, 7.68 mmol) and pyridine (0.8 mL, 9.98 mmol) in dry THF (200 mL) at -78 °C, a solution of methyl sulfinyl chloride, **35** (0.72 mL, 9.98 mmol) was added dropwise with vigorous stirring. The reaction was stirred for 1h at -78 °C, then HCl (10 % aq.) was added, and the aqueous phase was extracted with CH<sub>2</sub>Cl<sub>2</sub> (3x60 mL). The combined organic phases were washed with saturated aqueous NaHCO<sub>3</sub> solution and saturated aqueous NaCl solution and dried with anhydrous Na<sub>2</sub>SO<sub>4</sub>. The solvent was removed under vacuum to give sulfinate **1(R<sub>S</sub>)** in a 96% d.e. Purification by column chromatography (iPrOH/hexane, 1:15) gave diastereomerically pure sulfinate **1(R<sub>S</sub>)** (2.14 g, 6.69 mmol, 87 % yield) as a yellow oil. [ $\alpha$ ]<sub>D</sub><sup>20</sup> : +17 (c 4.4, acetone); <sup>1</sup>H-NMR (500 MHz, CDCl<sub>3</sub>):  $\delta$  5.91 (d, *J* = 3.6 Hz, 1H), 4.76 (d, *J* = 3.6 Hz, 1H), 4.72 (d, *J* = 2.9 Hz, 1H), 4.17-4.09 (m, 3H), 4.02-3.98 (m, 1H), 2.70 (s, 3H), 1.50, 1.41, 1.32, 1.30 (4s, 12H) ppm; <sup>13</sup>C-NMR (125 MHz, CDCl<sub>3</sub>):  $\delta$  112.6, 109.6, 105.5, 84.0, 83.1, 80.9, 72.4, 67.7, 44.9, 27.0, 26.9, 26.3, 25.4 ppm; HRMS (ESI) m/z: [M+Na]<sup>+</sup> Calcd for C<sub>13</sub>H<sub>22</sub>O<sub>7</sub>NaS 345.0978; found 345.0974.

Synthesis of methylsulfoxides: general procedure.

To a solution of the corresponding methanesulfinate **1** (100 mol%) in toluene or diethyl ether at 0 °C, a solution of RMgCl or ArMgBr (150 mol%) was added dropwise. After stirring for 1 h, the reaction was quenched with saturated aqueous NH<sub>4</sub>Cl solution, and the aqueous phase was extracted with EtOAc (5 x 25 mL) and CH<sub>2</sub>Cl<sub>2</sub> (3 x 10 mL). The combined organic phases were washed with saturated aqueous NaCl solution and dried with anhydrous Na<sub>2</sub>SO<sub>4</sub>. The solvent was evaporated under reduced pressure and the reaction crude was purified by flash chromatography to obtain the desired compound.

*Methyl Phenyl sulfoxide, **2(S<sub>S</sub>)***

It was prepared following the general procedure from 5.4 g of methanesulfinate **1(S<sub>S</sub>)** (16.76 mmol), 25 mL of 1 M PhMgBr solution (25.13 mmol) and toluene (40 mL). The residue obtained was purified by flash chromatography (EtOAc:hexane, 10:1) to obtain sulfoxide **2(S<sub>S</sub>)** (1.9 g, 13.41 mmol, 80% yield) as a yellow oil; [ $\alpha$ ]<sub>D</sub><sup>20</sup> : -143 (c 1.0, acetone); <sup>1</sup>H-NMR (500 MHz, CDCl<sub>3</sub>):  $\delta$  7.66-7.64 (m, 2H), 7.55-7.48 (m, 3H), 2.73 (s, 3H) ppm; <sup>13</sup>C-NMR (125 MHz, CDCl<sub>3</sub>):  $\delta$  146.0, 131.2, 129.5, 123.7, 44.2 ppm; HRMS (ESI) m/z: [M+H]<sup>+</sup> Calcd for C<sub>7</sub>H<sub>9</sub>ONaS 163.0188; found 163.0186.

*Methyl Phenyl sulfoxide, **2(R<sub>S</sub>)***

It was prepared following the general procedure from 3.2 g of methanesulfinate **1(R<sub>S</sub>)** (10.03 mmol), 15 mL of 1.0M PhMgBr solution (15.05 mmol) and toluene (25 mL). The residue obtained was purified by flash chromatography (EtOAc: CH<sub>2</sub>Cl<sub>2</sub>, 1:2) to give sulfoxide **2(R<sub>S</sub>)** (1.1 g, 7.82 mmol, 78% yield) as a yellow oil with similar physicochemical and spectroscopic characteristics than **2(S<sub>S</sub>)**; [ $\alpha$ ]<sub>D</sub><sup>20</sup> : +149 (c 2.0, ethanol). HRMS (ESI) m/z: [M+H]<sup>+</sup> Calcd for C<sub>7</sub>H<sub>9</sub>OS 141.0010; found 141.0006.

#### *Methyl Tert-butyl sulfoxide, 3(S<sub>S</sub>)*

It was prepared following the general procedure from 3.8 g of methanesulfinate **1(S<sub>S</sub>)** (11.76 mmol), 10.4 mL of 1.7 M <sup>t</sup>BuMgCl solution (17.63 mmol) and diethyl ether (30 mL). The residue obtained was purified by flash chromatography (EtOAc) to obtain sulfoxide **3(S<sub>S</sub>)** (1.2 g, 9.72 mmol, 83% yield) as a colorless oil;  $[\alpha]_{\text{D}}^{20}$  : +19 (c 1.0, MeOH); <sup>1</sup>H-NMR (500 MHz, CDCl<sub>3</sub>):  $\delta$  2.36 (s, 3H), 1.24 (s, 9H) ppm; <sup>13</sup>C-NMR (125 MHz, CDCl<sub>3</sub>):  $\delta$  52.7, 31.7, 22.6 ppm; HRMS (ESI) m/z: [M+Na]<sup>+</sup> Calcd for C<sub>5</sub>H<sub>12</sub>OSNa 143.0501; found 143.0501.

#### *Methyl Tert-butyl sulfoxide, 3(R<sub>S</sub>)*

It was prepared following the general procedure from 3.7 g of methanesulfinate **1(R<sub>S</sub>)** (11.43 mmol), 10 mL of 1.7 M <sup>t</sup>BuMgCl solution (17.15 mmol) and diethyl ether (30 mL). The residue obtained was purified by flash chromatography (EtOAc) to obtain sulfoxide **3(R<sub>S</sub>)** (1.1 g, 8.77 mmol, 77% yield) as a colorless oil with similar physicochemical and spectroscopic characteristics than **3(S<sub>S</sub>)**;  $[\alpha]_{\text{D}}^{20}$  : +4.3 (c 1.6, acetone). HRMS (ESI) m/z: [M]<sup>+</sup> Calcd for C<sub>5</sub>H<sub>12</sub>OS 120.0608; found 120.0609.

#### **Synthesis of N-Sulfinylimines: general procedure.<sup>2</sup>**

To a solution of the corresponding aldehyde (100 mol%) and the (*R*)-*tert*-butanesulfinamide (110 mol%) in dry THF, at room temperature under argon atmosphere, Ti(OEt)<sub>4</sub> (110 mol%) was added. Once the starting material was consumed (24-48h), the reaction mixture was hydrolyzed with a saturated NaCl aqueous solution. The resulting suspension was filtered through a pad of Celite. The aqueous phase was extracted with CH<sub>2</sub>Cl<sub>2</sub> (3 x 40 mL) and the combined organic phases were dried with anhydrous Na<sub>2</sub>SO<sub>4</sub>. The solvent was evaporated under reduced pressure and the reaction crude was purified by flash chromatography to obtain the desired compound.

#### *(R<sub>S</sub>)-N-[(2-Naphthyl)methylidene]-2-methyl-2-propanesulfinamide, 4(R<sub>S</sub>).*

It was prepared following the general procedure from 5 g of (*R*)-*tert*-butanesulfinamide (41.25 mmol), 5.86 mL of 2-naphthaldehyde (37.5 mmol) and 8.7 mL of Ti(OEt)<sub>4</sub> (41.25 mmol). After 24 hours, the resulting residue was purified by flash chromatography (EtOAc:hexane, 1:10) to give **4(R<sub>S</sub>)** (9.2 g, 35.39 mmol, 95% yield) as a white solid; mp 112-113 °C;  $[\alpha]_{\text{D}}^{20}$  : -173.7 (c 1, CHCl<sub>3</sub>); <sup>1</sup>H-NMR (500 MHz, CDCl<sub>3</sub>):  $\delta$  8.76 (s, 1H), 8.21 (s, 1H), 8.04 (dd, *J*<sub>1</sub> = 1.5, *J*<sub>2</sub> = 8.6 Hz, 1H), 7.96-7.94 (m, 1H), 7.91-7.87 (m, 2H), 7.61-7.54 (m, 2H), 1.30 (s, 9H) ppm; <sup>13</sup>C-NMR (125 MHz, CDCl<sub>3</sub>):  $\delta$  162.9, 135.6, 133.2, 132.6, 132.0, 129.3, 129.0, 128.4, 128.1, 127.1, 124.0, 58.0, 22.8 ppm. HRMS (ESI) m/z: [M+Na]<sup>+</sup> Calcd for C<sub>15</sub>H<sub>17</sub>NOSNa 282.0918; found 282.0923.

#### *(R<sub>S</sub>)-N-Benzylidene-2-methyl-2-propanesulfinamide, 5(R<sub>S</sub>).*

It was prepared following the general procedure from 5 g of (*R*)-*tert*-butanesulfinamide (41.25 mmol), 3.8 mL of benzaldehyde (37.5 mmol) and 8.7 mL of Ti(OEt)<sub>4</sub> (41.25 mmol). After 24 hours, the resulting residue was purified by flash chromatography (EtOAc:hexane, 1:50) to give **5(R<sub>S</sub>)** (6.3 g, 30.15 mmol, 80% yield) as a yellow liquid;  $[\alpha]_{\text{D}}^{20}$  : -122 (c 1, CHCl<sub>3</sub>); <sup>1</sup>H-NMR (500 MHz, CDCl<sub>3</sub>):  $\delta$  8.58 (s, 1H), 7.84-7.83 (m, 2H), 7.51-7.44 (m, 3H), 1.26 (s, 9H) ppm; <sup>13</sup>C-NMR (125 MHz, CDCl<sub>3</sub>):  $\delta$  163.1, 134.4, 132.7, 129.7, 129.3, 58.0, 22.9 ppm; HRMS (ESI) m/z: [M+H]<sup>+</sup> Calcd for C<sub>11</sub>H<sub>16</sub>ONS 210.0947; found 210.0940.

*(R<sub>S</sub>)-N-(2-methyl-1-propylidene)-2-methyl-2-propanesulfonamide, 6(R<sub>S</sub>).*

It was prepared following the general procedure from 5 g of (*R*)-*tert*-butanesulfonamide (41.25 mmol, 100 mol%), 5.6 mL of isopropylaldehyde (61.88 mmol, 150 mol%) and 8.7 mL of Ti(OEt)<sub>4</sub> (41.25 mmol, 100 mol%). After 24 hours, the resulting residue was purified by flash chromatography (EtOAc:hexane, 1:20) to give **6(R<sub>S</sub>)** (7.23 g, 41.25 mmol, quant. yield) as a yellow liquid; [α]<sub>D</sub><sup>20</sup>: -253.2 (c 1, CHCl<sub>3</sub>); <sup>1</sup>H-NMR (500 MHz, CDCl<sub>3</sub>): δ 7.93 (d, *J* = 4.4 Hz, 1H), 2.70-2.61 (m, 1H), 1.19 (s, 9H), 1.12 (d, *J* = 2.4 Hz, 3H), 1.10 (d, *J* = 2.4 Hz, 3H) ppm; <sup>13</sup>C-NMR (125 MHz, CDCl<sub>3</sub>): δ 173.9, 56.7, 35.1, 22.5, 19.1, 19.0 ppm; HRMS (ESI) *m/z*: [M+H]<sup>+</sup> Calcd for C<sub>8</sub>H<sub>18</sub>ONS 176.1100; found 176.1104.

### Synthesis of sulfonamide/sulfoxide ligands: general procedure.<sup>2</sup>

To a solution of the corresponding (*R*)-*tert*-butylsulfonylimine (100 mol%) and the corresponding methyl sulfoxide (100 mol%) in dry THF, at -78°C under argon atmosphere, a 1 M solution of LHMDS (300 mol%) was added dropwise. Once the starting material was consumed, the reaction mixture was hydrolyzed with a saturated NH<sub>4</sub>Cl aqueous solution. The aqueous phase was extracted with EtOAc (3 x 40 mL) and the combined organic phases were dried with anhydrous Na<sub>2</sub>SO<sub>4</sub>. The solvent was evaporated under reduced pressure and the resulting residue was purified by flash chromatography to obtain the desired compounds.

*(R<sub>S</sub>,S<sub>C</sub>,R<sub>S</sub>)-N-[1-(2-Naphthyl)-2-(phenylsulfinyl)ethyl]-2-methyl-2-propanesulfonamide, 7(R<sub>S</sub>,S<sub>C</sub>,R<sub>S</sub>)*

It was prepared following the general procedure from 454 mg of the (*R*)-*tert*-butanesulfonylimine **4(R<sub>S</sub>)** (1.75 mmol), 245 mg of phenyl methyl sulfoxide **2(R<sub>S</sub>)** (1.75 mmol), 5.25 mL of LHMDS (5.25 mmol) and THF (10 mL). After 1 h, the resulting residue was purified by flash chromatography (EtOAc:CH<sub>2</sub>Cl<sub>2</sub>, 2:1) to give **7(R<sub>S</sub>,S<sub>C</sub>,R<sub>S</sub>)** (628 mg, 1.57 mmol, 90% yield) as a white solid; mp 176-177 °C; [α]<sub>D</sub><sup>20</sup>: +79.9 (c 1, CHCl<sub>3</sub>); <sup>1</sup>H-NMR (500 MHz, CD<sub>3</sub>CN): δ 7.90-7.86 (m, 4H), 7.67-7.65 (m, 2H), 7.57-7.50 (m, 6H), 4.97 (td, *J*<sub>1</sub> = 3.3 Hz, *J*<sub>2</sub> = 10.1 Hz, *J*<sub>3</sub> = 10.3 Hz, 1H), 4.91 (d, *J* = 9.7 Hz, 1H), 3.24 (AB fragment of an ABX system, Δ*v* = 157 Hz, *J*<sub>AX</sub> = 3.3 Hz, *J*<sub>BX</sub> = 10.6 Hz, *J*<sub>AB</sub> = 13.3 Hz, 2H), 1.26 (s, 9H) ppm; <sup>13</sup>C-NMR (125 MHz, CD<sub>3</sub>CN): δ 145.7, 139.9, 134.2, 133.9, 132.0, 130.4, 129.4, 128.9, 128.6, 127.5, 127.3, 127.0, 126.1, 124.8, 65.8, 57.7, 57.5, 23.0 ppm; HRMS (ESI) *m/z*: [M+Na]<sup>+</sup> Calcd for C<sub>22</sub>H<sub>25</sub>O<sub>2</sub>NS<sub>2</sub>Na 422.1219; found 422.1212; FTIR peaks (cm<sup>-1</sup>): 1065 (ν<sub>SO<sub>NH</sub></sub>), 1020 (ν<sub>SO<sub>Ph</sub></sub>).

*(R<sub>S</sub>,S<sub>C</sub>,S<sub>S</sub>)-N-[1-(2-Naphthyl)-2-(phenylsulfinyl)ethyl]-2-methyl-2-propanesulfonamide, 7(R<sub>S</sub>,S<sub>C</sub>,S<sub>S</sub>)*

It was prepared following the general procedure from 454 mg of the (*R*)-*tert*-butanesulfonylimine **4(R<sub>S</sub>)** (1.75 mmol), 245 mg of phenyl methyl sulfoxide **2(S<sub>S</sub>)** (1.75 mmol), 5.25 mL of LHMDS (5.25 mmol) and THF (10 mL). After 1 h, the resulting residue was purified by flash chromatography (EtOAc:CH<sub>2</sub>Cl<sub>2</sub>, 2:1) to give **7(R<sub>S</sub>,S<sub>C</sub>,S<sub>S</sub>)** (657 mg, 1.64 mmol, 94% yield) as a white solid; mp 178 °C; [α]<sub>D</sub><sup>20</sup>: -76.7 (c 1, CHCl<sub>3</sub>); <sup>1</sup>H-NMR (500 MHz, CD<sub>3</sub>CN): δ 7.93-7.89 (m, 4H), 7.73-7.65 (m, 2H), 7.59-7.49 (m, 6H), 4.88 (dd, *J*<sub>1</sub> = 7.3 Hz, *J*<sub>2</sub> = 14.5 Hz, 1H), 4.79 (d, *J* = 7.0 Hz, 1H), 3.36 (AB fragment of an

ABX system,  $\Delta\nu = 63$  Hz,  $J_{AX} = 7.6$  Hz,  $J_{BX} = 7.0$  Hz,  $J_{AB} = 13.1$  Hz, 2H), 1.17 (s, 9H) ppm;  $^{13}\text{C-NMR}$  (125 MHz,  $\text{CD}_3\text{CN}$ ):  $\delta$  145.6, 139.2, 134.2 (2), 132.3, 130.4, 129.5, 128.9, 128.6, 127.6, 127.5, 127.4, 126.3, 125.1, 65.3, 57.9, 57.0, 22.9 ppm; HRMS (ESI)  $m/z$ :  $[\text{M}+\text{Na}]^+$  Calcd for  $\text{C}_{22}\text{H}_{25}\text{O}_2\text{NS}_2\text{Na}$  422.1219; found 422.1212; FTIR peaks ( $\text{cm}^{-1}$ ): 1064 ( $\nu_{\text{SONH}}$ ), 1016 ( $\nu_{\text{SOPH}}$ ).

*(R<sub>S</sub>,S<sub>C</sub>,R<sub>S</sub>)-N-[1-Phenyl-2-(phenylsulfinyl)ethyl]-2-methyl-2-propanesulfinamide,*  
**8(R<sub>S</sub>,S<sub>C</sub>,R<sub>S</sub>)**

It was prepared following the general procedure from 419 mg of the (*R*)-*tert*-butanesulfinylimine **5(R<sub>S</sub>)** (2 mmol), 280 mg of phenyl methyl sulfoxide **2(R<sub>S</sub>)** (2 mmol), 6 mL of LHMDS (6 mmol) and THF (10 mL). After 10 minutes, the resulting residue was purified by flash chromatography (EtOAc:CH<sub>2</sub>Cl<sub>2</sub>, 1:2) to give **8(R<sub>S</sub>,S<sub>C</sub>,R<sub>S</sub>)** (636 mg, 1.82 mmol, 91% yield) as a white solid; mp 161-162 °C;  $[\alpha]_{\text{D}}^{20}$ : +121 (*c* 1, CHCl<sub>3</sub>);  $^1\text{H-NMR}$  (500 MHz,  $\text{CD}_3\text{CN}$ ):  $\delta$  7.65-7.64 (m, 2H), 7.57-7.52 (m, 3H), 7.42-7.40 (m, 2H), 7.37-7.34 (m, 2H), 7.30-7.27 (m, 1H), 4.81 (m, 2H), 3.14 (AB fragment of an ABX system,  $\Delta\nu = 150$  Hz,  $J_{AX} = 2.9$  Hz,  $J_{BX} = 10.8$  Hz,  $J_{AB} = 13.3$  Hz, 2H), 1.25 (s, 9H) ppm;  $^{13}\text{C-NMR}$  (125 MHz,  $\text{CD}_3\text{CN}$ ):  $\delta$  145.7, 142.5, 132.0, 130.4, 129.7, 128.9, 128.1, 124.8, 66.1, 57.7, 57.5, 23.0 ppm; HRMS (ESI)  $m/z$ :  $[\text{M}+\text{Na}]^+$  Calcd for  $\text{C}_{18}\text{H}_{23}\text{O}_2\text{NS}_2\text{Na}$  372.1062; found 372.1056; FTIR peaks ( $\text{cm}^{-1}$ ): 1054 ( $\nu_{\text{SONH}}$ ), 1016 ( $\nu_{\text{SOPH}}$ ).

*(R<sub>S</sub>,S<sub>C</sub>,S<sub>S</sub>)-N-[1-Phenyl-2-(phenylsulfinyl)ethyl]-2-methyl-2-propanesulfinamide,*  
**8(R<sub>S</sub>,S<sub>C</sub>,S<sub>S</sub>)**

It was prepared following the general procedure from 419 mg of the (*R*)-*tert*-butanesulfinylimine **5(R<sub>S</sub>)** (2 mmol), 280 mg of phenyl methyl sulfoxide **2(S<sub>S</sub>)** (2 mmol), 6 mL of LHMDS (6 mmol) and THF (10 mL). After 10 minutes, the resulting residue was purified by flash chromatography (EtOAc:CH<sub>2</sub>Cl<sub>2</sub>, 1:1) to give **8(R<sub>S</sub>,S<sub>C</sub>,S<sub>S</sub>)** (625 mg, 1.79 mmol, 89% yield) as a yellow solid; mp 121-123 °C;  $[\alpha]_{\text{D}}^{20}$ : -99.7 (*c* 1, CHCl<sub>3</sub>);  $^1\text{H-NMR}$  (500 MHz,  $\text{CD}_3\text{CN}$ ):  $\delta$  7.66-7.64 (m, 2H), 7.59-7.55 (m, 3H), 7.45-7.38 (m, 4H), 7.35-7.32 (m, 1H), 4.70 (m, 2H), 3.26 (AB fragment of an ABX system,  $\Delta\nu = 79$  Hz,  $J_{AX} = 7.3$  Hz,  $J_{BX} = 7.2$  Hz,  $J_{AB} = 13.1$  Hz, 2H), 1.16 (s, 9H) ppm;  $^{13}\text{C-NMR}$  (125 MHz,  $\text{CD}_3\text{CN}$ ):  $\delta$  145.6, 141.9, 132.3, 130.4, 129.7, 129.2, 128.5, 125.1, 65.7, 57.8, 57.0, 22.9 ppm; HRMS (ESI)  $m/z$ :  $[\text{M}+\text{Na}]^+$  Calcd for  $\text{C}_{18}\text{H}_{23}\text{O}_2\text{NS}_2\text{Na}$  372.1062; found 372.1055; FTIR peaks ( $\text{cm}^{-1}$ ): 1074 ( $\nu_{\text{SONH}}$ ), 1020 ( $\nu_{\text{SOPH}}$ ).

*(R<sub>S</sub>,S<sub>C</sub>,R<sub>S</sub>)-N-[1-(Phenylsulfinyl)-3-methylbut-2-yl]-2-methyl-2-propanesulfinamide,*  
**9(R<sub>S</sub>,S<sub>C</sub>,R<sub>S</sub>)**

It was prepared following the general procedure from 351 mg of the (*R*)-*tert*-butanesulfinylimine **6(R<sub>S</sub>)** (2 mmol), 280 mg of phenyl methyl sulfoxide **2(R<sub>S</sub>)** (2 mmol), 6 mL of LHMDS (6 mmol) and THF (9 mL). After 1 h, the resulting residue was purified by flash chromatography (EtOAc:CH<sub>2</sub>Cl<sub>2</sub>, 1:1) to give **9(R<sub>S</sub>,S<sub>C</sub>,R<sub>S</sub>)** (512 mg, 1.62 mmol, 81% yield) as a white solid; mp 152-153 °C;  $[\alpha]_{\text{D}}^{20}$ : +149.8 (*c* 1, CHCl<sub>3</sub>);  $^1\text{H-NMR}$  (500 MHz,  $\text{CD}_3\text{CN}$ ):  $\delta$  7.65-7.63 (m, 2H), 7.59-7.51 (m, 3H), 4.12 (d,  $J = 9.9$  Hz, 1H), 3.63-3.57 (m, 1H), 2.80 (AB fragment of an ABX system,  $\Delta\nu = 56$  Hz,  $J_{AX} = 2.8$  Hz,  $J_{BX} = 11.3$  Hz,  $J_{AB} = 13.2$  Hz, 2H), 2.11-2.02 (m, 1H), 1.26 (s, 9H), 0.94 (d,  $J = 6.9$  Hz, 3H), 0.92 (d,  $J = 6.9$  Hz, 3H) ppm;  $^{13}\text{C-NMR}$  (125 MHz,  $\text{CD}_3\text{CN}$ ):  $\delta$  146.5, 131.8, 130.3, 124.7, 62.4, 59.2, 57.4,

34.1, 23.2, 19.0, 17.8 ppm; HRMS (ESI)  $m/z$ :  $[M+Na]^+$  Calcd for  $C_{15}H_{25}O_2NS_2Na$  338.1219; found 338.1216; FTIR peaks ( $cm^{-1}$ ): 1062 ( $\nu_{SONH}$ ), 1017 ( $\nu_{SOPh}$ ).

*(R<sub>S</sub>,S<sub>C</sub>,S<sub>S</sub>)-N-[1-(Phenylsulfinyl)-3-methylbut-2-yl]-2-methyl-2-propanesulfinamide,*

**9(R<sub>S</sub>,S<sub>C</sub>,S<sub>S</sub>)**

It was prepared following the general procedure from 351 mg of the (*R*)-*tert*-butanesulfinylimine **6(R<sub>S</sub>)** (2 mmol), 280 mg of phenyl methyl sulfoxide **2(S<sub>S</sub>)** (2 mmol), 6 mL of LHMDS (6 mmol) and THF (9 mL). After 1 h, the resulting residue was purified by flash chromatography (EtOAc:CH<sub>2</sub>Cl<sub>2</sub>, 1:2) to give **9(R<sub>S</sub>,S<sub>C</sub>,S<sub>S</sub>)** (575 mg, 1.82 mmol, 91% yield) as a white solid; mp 127 °C;  $[\alpha]_D^{20}$ : -72.4 (*c* 1, CHCl<sub>3</sub>); <sup>1</sup>H-NMR (500 MHz, CD<sub>3</sub>CN):  $\delta$  7.70-7.67 (m, 2H), 7.60-7.55 (m, 3H), 4.07 (d, *J* = 8.1 Hz, 1H), 3.28 (m, 1H), 2.99 (AB fragment of an ABX system,  $\Delta\nu$  = 40 Hz, *J*<sub>AX</sub> = 4.8 Hz, *J*<sub>BX</sub> = 8.3 Hz, *J*<sub>AB</sub> = 13.4 Hz, 2H), 2.10-2.04 (m, 1H), 1.20 (s, 9H), 0.94 (d, *J* = 6.9 Hz, 3H), 0.83 (d, *J* = 6.9 Hz, 3H) ppm; <sup>13</sup>C-NMR (125 MHz, CD<sub>3</sub>CN):  $\delta$  145.9, 132.3, 130.4, 125.4, 61.8, 59.7, 57.1, 33.4, 23.1, 18.5, 18.0 ppm; HRMS (ESI)  $m/z$ :  $[M+Na]^+$  Calcd for  $C_{15}H_{25}O_2NS_2Na$  338.1219; found 338.1217; FTIR peaks ( $cm^{-1}$ ): 1066 ( $\nu_{SONH}$ ), 1032 ( $\nu_{SOPh}$ ).

*(R<sub>S</sub>,S<sub>C</sub>,R<sub>S</sub>)-N-[1-(2-Naphthyl)-2-(*tert*-butylsulfinyl)ethyl]-2-methyl-2-propanesulfinamide,*

**10(R<sub>S</sub>,S<sub>C</sub>,R<sub>S</sub>)**

It was prepared following the general procedure from 454 mg of the (*R*)-*tert*-butanesulfinylimine **4(R<sub>S</sub>)** (1.75 mmol), 210 mg of *tert*-butyl methyl sulfoxide **3(R<sub>S</sub>)** (1.75 mmol), 5.25 mL of LHMDS (5.25 mmol) and THF (10 mL). After 1 h, the resulting residue was purified by flash chromatography (CH<sub>2</sub>Cl<sub>2</sub>:iPrOH, 80:1) to give **10(R<sub>S</sub>,S<sub>C</sub>,R<sub>S</sub>)** (516 mg, 1.36 mmol, 78% yield) as a yellow solid; mp 158-160 °C;  $[\alpha]_D^{20}$ : +70.5 (*c* 1, CHCl<sub>3</sub>); <sup>1</sup>H-NMR (500 MHz, CD<sub>3</sub>CN):  $\delta$  7.94-7.87 (m, 4H), 7.59 (dd, *J*<sub>1</sub> = 1.8 Hz, *J*<sub>2</sub> = 8.5 Hz, 1H), 7.55-7.50 (m, 2H), 4.93 (td, *J*<sub>1</sub> = 2.9 Hz, *J*<sub>2</sub> = 10.2 Hz, *J*<sub>3</sub> = 10.6 Hz, 1H), 4.86 (d, *J* = 10.0 Hz, 1H), 2.97 (AB fragment of an ABX system,  $\Delta\nu$  = 171 Hz, *J*<sub>AX</sub> = 3.0 Hz, *J*<sub>BX</sub> = 10.5 Hz, *J*<sub>AB</sub> = 12.8 Hz, 2H), 1.22 (s, 9H), 1.19 (s, 9H) ppm; <sup>13</sup>C-NMR (125 MHz, CD<sub>3</sub>CN):  $\delta$  140.8, 134.2, 133.9, 129.2, 128.8, 128.6, 127.5, 127.2, 126.8, 126.2, 57.7, 57.4, 54.0, 53.3, 23.0 (2) ppm; HRMS (ESI)  $m/z$ :  $[M+Na]^+$  Calcd for  $C_{20}H_{29}O_2NS_2Na$  402.1532; found 402.1532; FTIR peaks ( $cm^{-1}$ ): 1066 ( $\nu_{SONH}$ ), 1002 ( $\nu_{SOTBu}$ ).

*(R<sub>S</sub>,S<sub>C</sub>,S<sub>S</sub>)-N-[1-(2-Naphthyl)-2-(*tert*-butylsulfinyl)ethyl]-2-methyl-2-propanesulfinamide,*

**10(R<sub>S</sub>,S<sub>C</sub>,S<sub>S</sub>)**

It was prepared following the general procedure from 454 mg of the (*R*)-*tert*-butanesulfinylimine **4(R<sub>S</sub>)** (1.75 mmol), 210 mg of *tert*-butyl methyl sulfoxide **3(S<sub>S</sub>)** (1.75 mmol), 5.25 mL of LHMDS (5.25 mmol) and THF (10 mL). After 1 h, the resulting residue was purified by flash chromatography (EtOAc:MeOH, 40:1) to give **10(R<sub>S</sub>,S<sub>C</sub>,S<sub>S</sub>)** (450 mg, 1.19 mmol, 68% yield) as a white solid; mp 148-160 °C;  $[\alpha]_D^{20}$ : -42.4 (*c* 1, CHCl<sub>3</sub>); <sup>1</sup>H-NMR (500 MHz, CD<sub>3</sub>CN):  $\delta$  7.95-7.89 (m, 4H), 7.61 (dd, *J*<sub>1</sub> = 1.8 Hz, *J*<sub>2</sub> = 8.5 Hz, 1H), 7.54-7.53 (m, 2H), 4.99 (d, *J* = 5.6 Hz, 1H), 4.92-4.88 (m, 1H), 3.06 (AB fragment of an ABX system,  $\Delta\nu$  = 33 Hz, *J*<sub>AX</sub> = 7.1 Hz, *J*<sub>BX</sub> = 7.8 Hz, *J*<sub>AB</sub> = 12.9 Hz, 2H), 1.18 (s, 9H), 1.17 (s, 9H) ppm; <sup>13</sup>C-NMR (125 MHz, CD<sub>3</sub>CN):  $\delta$  139.6, 134.2, 134.1, 129.5, 128.9, 128.6, 127.8, 127.5, 127.4, 126.4, 58.4, 56.9, 54.0, 53.3, 22.8 ppm; HRMS (ESI)  $m/z$ :  $[M+Na]^+$  Calcd for  $C_{20}H_{29}O_2NS_2Na$  402.1532; found 402.1525; FTIR peaks ( $cm^{-1}$ ): 1071 ( $\nu_{SONH}$ ), 1024 ( $\nu_{SOTBu}$ ).

*(R<sub>S</sub>,S<sub>C</sub>,R<sub>S</sub>)-N-[2-(tert-butylsulfinyl)-1-phenylethyl]-2-methyl-2-propanesulfinamide,*

**11(R<sub>S</sub>,S<sub>C</sub>,R<sub>S</sub>)**

It was prepared following the general procedure from 136 mg of the (*R*)-*tert*-butanesulfinylimine **5(R<sub>S</sub>)** (0.65 mmol), 78 mg of *tert*-butyl methyl sulfoxide **3(R<sub>S</sub>)** (0.65 mmol), 1.95 mL of LHMDS (1.95 mmol) and THF (4 mL). After 1 h, the resulting residue was purified by flash chromatography (CH<sub>2</sub>Cl<sub>2</sub>:iPrOH, 40:1) to give **11(R<sub>S</sub>,S<sub>C</sub>,R<sub>S</sub>)** (165 mg, 0.5 mmol, 77% yield) as a yellow solid; mp 194-196 °C; [α]<sub>D</sub><sup>20</sup> : +77.6 (c 1, CHCl<sub>3</sub>); <sup>1</sup>H-NMR (500 MHz, CD<sub>3</sub>CN): δ 7.46-7.44 (m, 2H), 7.40-7.36 (m, 2H), 7.32-7.29 (m, 1H), 4.77-4.76 (m, 2H), 3.06-2.99 (m, 1H), 2.72-2.69 (m, 1H), 1.20 (s, 9H), 1.18 (s, 9H) ppm; <sup>13</sup>C-NMR (125 MHz, CD<sub>3</sub>CN): δ 144.0, 130.2, 129.4, 128.7, 58.3, 58.0, 54.9, 53.9, 23.6 (2) ppm; HRMS (ESI) m/z: [M+Na]<sup>+</sup> Calcd for C<sub>16</sub>H<sub>27</sub>O<sub>2</sub>NS<sub>2</sub>Na 352.1375; found 352.1372; FTIR peaks (cm<sup>-1</sup>): 1067 (ν<sub>SONH</sub>), 1026 (ν<sub>SOTBu</sub>).

*(R<sub>S</sub>,S<sub>C</sub>,S<sub>S</sub>)-N-[2-(tert-butylsulfinyl)-1-phenylethyl]-2-methyl-2-propanesulfinamide,*

**11(R<sub>S</sub>,S<sub>C</sub>,S<sub>S</sub>)**

It was prepared following the general procedure from 419 mg of the (*R*)-*tert*-butanesulfinylimine **5(R<sub>S</sub>)** (2 mmol), 240 mg of *tert*-butyl methyl sulfoxide **3(S<sub>S</sub>)** (2 mmol), 6 mL of LHMDS (6 mmol) and THF (10 mL). After 1 h, the resulting residue was purified by flash chromatography (CH<sub>2</sub>Cl<sub>2</sub>:iPrOH, 60:1) to give **11(R<sub>S</sub>,S<sub>C</sub>,S<sub>S</sub>)** (428 mg, 1.3 mmol, 65% yield) as a yellow solid; mp 161-163 °C; [α]<sub>D</sub><sup>20</sup> : -68.9 (c 1, CHCl<sub>3</sub>); <sup>1</sup>H-NMR (500 MHz, CD<sub>3</sub>CN): δ 7.48-7.45 (m, 2H), 7.41-7.38 (m, 2H), 7.35-7.32 (m, 1H), 4.90 (d, *J* = 5.4 Hz, 1H), 4.73 (dd, *J*<sub>1</sub> = 7.2 Hz, *J*<sub>2</sub> = 13.3 Hz, 1H), 2.95 (AB fragment of an ABX system, Δ*v* = 26 Hz, *J*<sub>AX</sub> = 7.2 Hz, *J*<sub>BX</sub> = 7.6 Hz, *J*<sub>AB</sub> = 12.9 Hz, 2H), 1.17 (s, 9H), 1.17 (s, 9H) ppm; <sup>13</sup>C-NMR (125 MHz, CD<sub>3</sub>CN): δ 142.2, 129.7, 129.2, 128.7, 58.4, 56.9, 54.0, 53.6, 22.9, 22.8 ppm; HRMS (ESI) m/z: [M+Na]<sup>+</sup> Calcd for C<sub>16</sub>H<sub>27</sub>O<sub>2</sub>NS<sub>2</sub>Na 352.1375; found 352.1371; FTIR peaks (cm<sup>-1</sup>): 1056 (ν<sub>SONH</sub>), 1004 (ν<sub>SOTBu</sub>).

*(R<sub>S</sub>,S<sub>C</sub>,R<sub>S</sub>)-N-[1-(tert-butylsulfinyl)-3-methylbutan-2-yl]-2-methyl-2-propanesulfinamide,*

**12(R<sub>S</sub>,S<sub>C</sub>,R<sub>S</sub>)**

It was prepared following the general procedure from 114 mg of the (*R*)-*tert*-butanesulfinylimine **6(R<sub>S</sub>)** (0.65 mmol), 78 mg of *tert*-butyl methyl sulfoxide **3(R<sub>S</sub>)** (0.65 mmol) 1.95 mL of LHMDS (1.95 mmol) and THF (4 mL). After 1 h, the resulting residue was purified by flash chromatography (CH<sub>2</sub>Cl<sub>2</sub>:iPrOH, 40:1) to give **12(R<sub>S</sub>,S<sub>C</sub>,R<sub>S</sub>)** (130 mg, 0.44 mmol, 68% yield) as a white solid; mp 177-179 °C; [α]<sub>D</sub><sup>20</sup> : +93 (c 1, CHCl<sub>3</sub>); <sup>1</sup>H-NMR (500 MHz, CD<sub>3</sub>CN): δ 4.00 (d, *J* = 9.6 Hz, 1H), 3.53-3.48 (m, 1H), 2.53 (AB fragment of an ABX system, Δ*v* = 60 Hz, *J*<sub>AX</sub> = 2.5 Hz, *J*<sub>BX</sub> = 10.9 Hz, *J*<sub>AB</sub> = 12.8 Hz, 2H), 2.11-2.05 (m, 1H), 1.19 (s, 9H), 1.18 (s, 9H), 0.98 (d, *J* = 6.9 Hz, 3H), 0.97 (d, *J* = 6.9 Hz, 3H) ppm; <sup>13</sup>C-NMR (125 MHz, CD<sub>3</sub>CN): δ 59.3, 57.3, 53.1, 49.7, 34.5, 23.2, 23.0, 19.2, 18.0 ppm; HRMS (ESI) m/z: [M+Na]<sup>+</sup> Calcd for C<sub>13</sub>H<sub>29</sub>O<sub>2</sub>NS<sub>2</sub>Na 318.1532; found 318.1530; FTIR peaks (cm<sup>-1</sup>): 1061 (ν<sub>SONH</sub>), 1026 (ν<sub>SOTBu</sub>).



*(R<sub>S</sub>,S<sub>C</sub>,S<sub>S</sub>)-N-[1-(tert-butylsulfinyl)-3-methylbutan-2-yl]-2-methyl-2-propanesulfinamide, 12(R<sub>S</sub>,S<sub>C</sub>,S<sub>S</sub>)*

It was prepared following the general procedure from 351 mg of the (*R*)-*tert*-butanesulfinylimine **6(R<sub>S</sub>)** (2 mmol), 240 mg of *tert*-butyl methyl sulfoxide **3(S<sub>S</sub>)** (2 mmol), 6 mL of LHMDS (6 mmol) and THF (9 mL). After 1 hours, the resulting residue was purified by flash chromatography (EtOAc:MeOH, 40:1) to give **12(R<sub>S</sub>,S<sub>C</sub>,S<sub>S</sub>)** (388 mg, 1.31 mmol, 66% yield) as a yellow solid; mp 71-72 °C;  $[\alpha]_D^{20}$ : -70.9 (*c* 1, CHCl<sub>3</sub>); <sup>1</sup>H-NMR (500 MHz, CD<sub>3</sub>CN): δ 4.19 (d, *J* = 6.9 Hz, 1H), 3.53-3.48 (m, 1H), 2.67 (AB fragment of an ABX system, Δ*v* = 169 Hz, *J*<sub>AX</sub> = 7.6 Hz, *J*<sub>BX</sub> = 6.0 Hz, *J*<sub>AB</sub> = 13.5 Hz, 2H), 2.19-2.12 (m, 1H), 1.19 (s, 9H), 1.19 (s, 9H), 1.02 (d, *J* = 6.8 Hz, 3H), 0.96 (d, *J* = 6.8 Hz, 3H) ppm; <sup>13</sup>C-NMR (125 MHz, CD<sub>3</sub>CN): δ 60.7, 56.9, 54.0, 50.3, 32.8, 23.0, 22.9, 18.7, 18.3 ppm; HRMS (ESI) *m/z*: [M+Na]<sup>+</sup> Calcd for C<sub>13</sub>H<sub>29</sub>O<sub>2</sub>NS<sub>2</sub>Na 318.1532; found 318.1532; FTIR peaks (cm<sup>-1</sup>): 1064 (ν<sub>SONH</sub>), 1025 (ν<sub>SOtBu</sub>).

### Synthesis of sulfinamide/sulfone ligands: general procedure.<sup>2</sup>

#### *Methyl Tert-butyl sulfone, 20*

To a solution of methyl *tert*-butyl sulfide (0.6 mL, 4.8 mmol, 100 mol%) in CH<sub>2</sub>Cl<sub>2</sub> (17 mL) at -78 °C, a solution of *m*CPBA (3.3 g, 14.4 mmol, 300 mol%) in CH<sub>2</sub>Cl<sub>2</sub> (18 mL) was added dropwise. After 24 h, the reaction mixture was quenched with a saturated NaHCO<sub>3</sub> aqueous solution (10 mL). The aqueous phase was extracted with CH<sub>2</sub>Cl<sub>2</sub> (3 x 10 mL) and the combined organic phases were dried with anhydrous Na<sub>2</sub>SO<sub>4</sub>. The solvent was evaporated under reduced pressure to obtain **20** (654 mg, 4.8 mmol, quant. yield) as a colorless liquid with no further purification; <sup>1</sup>H-NMR (500 MHz, CDCl<sub>3</sub>): δ 2.80 (s, 3H), 1.42 (s, 9H) ppm; <sup>13</sup>C-NMR (125 MHz, CDCl<sub>3</sub>): δ 58.8, 34.3, 23.5 ppm; HRMS (ESI) *m/z*: [M+Na]<sup>+</sup> Calcd for C<sub>5</sub>H<sub>12</sub>O<sub>2</sub>SNa 159.0450; found 159.0448.

#### *(R<sub>S</sub>,S<sub>C</sub>)-N-[2-(Tert-butylsulfonyl)-1-(2-naphthyl)ethyl]-2-methyl-2-propanesulfinamide, 21(R<sub>S</sub>,S<sub>C</sub>)*

It was prepared following the general procedure for the synthesis of sulfonamide/sulfoxide ligands from 259 mg of (*R*)-*tert*-butanesulfinylimine **4(R<sub>S</sub>)** (1 mmol), 136 mg of methyl *tert*-butyl sulfone **20** (1 mmol) and 3 mL of 1 M solution of LHMDS (3 mmol). After 1 h, the resulting residue was purified by flash chromatography (EtOAc:CH<sub>2</sub>Cl<sub>2</sub>, 1:3) to give **21(R<sub>S</sub>,S<sub>C</sub>)** (237 mg, 0.6 mmol, 60% yield) as a white solid; mp 196-198 °C;  $[\alpha]_D^{20}$ : -3.7 (*c* 1, CHCl<sub>3</sub>); <sup>1</sup>H-NMR (500 MHz, CD<sub>3</sub>CN): δ 7.97-7.88 (m, 4H), 7.61 (dd, *J*<sub>1</sub> = 1.8 Hz, *J*<sub>2</sub> = 8.5 Hz, 1H), 7.59-7.51 (m, 2H), 5.14-5.10 (m, 1H), 4.91 (d, *J* = 6.5 Hz, 1H), 3.60 (AB fragment of an ABX system, Δ*v* = 125 Hz, *J*<sub>AX</sub> = 4.1 Hz, *J*<sub>BX</sub> = 8.9 Hz, *J*<sub>AB</sub> = 13.8 Hz, 2H), 1.36 (s, 9H), 1.18 (s, 9H) ppm; <sup>13</sup>C-NMR (125 MHz, CD<sub>3</sub>CN): δ 139.3, 134.2, 134.1, 129.3, 128.9, 128.6, 127.7, 127.5, 127.4, 126.6, 60.6, 57.1, 56.4, 52.3, 23.3, 22.8 ppm; HRMS (ESI) *m/z*: [M+Na]<sup>+</sup> Calcd for C<sub>20</sub>H<sub>29</sub>O<sub>3</sub>NS<sub>2</sub>Na 418.1485; found 418.1481; FTIR peaks (cm<sup>-1</sup>): 1110 (ν<sub>SO<sub>2</sub>tBu</sub>), 1069 (ν<sub>SONH</sub>).

### Synthesis of Pd complexes: general procedure.

A solution of the corresponding ligand **7-12**, **19** or **21** (100 mol%) and Pd(CNCH<sub>3</sub>)<sub>2</sub>Cl<sub>2</sub> (100 mol%) in dry CH<sub>2</sub>Cl<sub>2</sub>, under argon atmosphere, is stirred at room temperature.

Once the starting material was consumed (24-48 h), the complexes are precipitated with Et<sub>2</sub>O (8 mL) and filtered to obtain the desired compounds without further purification.

*cis-Dichloro[(S<sub>C</sub>S<sub>S</sub>)-1-(2-Naphthyl)-2-(phenylsulfinyl)ethylamine]palladium (II), 13(S<sub>C</sub>S<sub>S</sub>)*

It was prepared following the general procedure from sulfinamide/sulfoxide ligand **7(R<sub>S</sub>,S<sub>C</sub>,R<sub>S</sub>)** (200 mg, 0.5 mmol) and Pd(CNCH<sub>3</sub>)<sub>2</sub>Cl<sub>2</sub> (180 mg, 0.5 mmol) in CH<sub>2</sub>Cl<sub>2</sub> (8 mL). After 48 h, the complex was precipitated with Et<sub>2</sub>O and filtered to give **13(S<sub>C</sub>S<sub>S</sub>)** (223 mg, 0.47 mmol, 94% yield) as a brown solid; mp: decomposes before melting; <sup>1</sup>H-NMR (500 MHz, CD<sub>3</sub>CN): δ 8.27-8.25 (m, 2H), 8.00 (bs, 1H), 7.92-7.87 (m, 3H), 7.76-7.71 (m, 3H), 7.56-7.54 (m, 3H), 5.05 (bs, 1H), 5.03-4.97 (m, 1H), 4.88-4.76 (m, 1H), 4.00 (dd, J<sub>1</sub> = 13.5 Hz, J<sub>2</sub> = 13.5 Hz, 1H), 3.86 (dt, J<sub>1</sub> = 2.9 Hz, J<sub>2</sub> = 13.8 Hz, 1H) ppm; <sup>13</sup>C-NMR (125 MHz, CD<sub>3</sub>CN): δ 139.9, 135.1, 134.4, 134.0, 132.8, 130.7, 129.8, 129.0, 128.7, 128.1, 127.9 (2), 127.5, 125.6, 71.5, 59.0 ppm. HRMS (ESI) m/z: [M+Na]<sup>+</sup> Calcd for C<sub>18</sub>H<sub>17</sub>ONCl<sub>2</sub>NaPdS 493.9335; found 493.9323; FTIR peaks (cm<sup>-1</sup>): 1133 (ν<sub>SOPH</sub>).

*cis-Dichloro[(S<sub>C</sub>R<sub>S</sub>)-1-(2-Naphthyl)-2-(phenylsulfinyl)ethylamine]palladium (II), 13(S<sub>C</sub>R<sub>S</sub>)*

It was prepared following the general procedure from sulfinamide/sulfoxide ligand **7(R<sub>S</sub>,S<sub>C</sub>,S<sub>S</sub>)** (200 mg, 0.5 mmol) and Pd(CNCH<sub>3</sub>)<sub>2</sub>Cl<sub>2</sub> (180 mg, 0.5 mmol) in CH<sub>2</sub>Cl<sub>2</sub> (8 mL). After 48 h, the complex was precipitated with Et<sub>2</sub>O and filtered to give **13(S<sub>C</sub>R<sub>S</sub>)** (236 mg, 0.5 mmol, quant. yield) as a brown solid; mp: decomposes before melting; <sup>1</sup>H-NMR (500 MHz, CD<sub>3</sub>CN): δ 8.53 (d, J = 7.3 Hz, 2H), 7.92-7.80 (m, 7H), 7.55-7.54 (m, 2H), 7.50-7.48 (m, 1H), 4.95 (bs, 1H), 4.82 (bs, 1H), 4.35-4.29 (m, 1H), 4.07-4.02 (m, 2H) ppm; <sup>13</sup>C-NMR (125 MHz, CD<sub>3</sub>CN): δ 140.7, 135.8, 134.4, 134.1, 132.4, 131.1, 129.9, 129.0, 128.7, 128.5, 128.1, 127.9 (2), 125.4, 69.7, 56.9 ppm. HRMS (ESI) m/z: [M+Na]<sup>+</sup> Calcd for C<sub>18</sub>H<sub>17</sub>ONCl<sub>2</sub>NaPdS 493.9335; found 493.9323; FTIR peaks (cm<sup>-1</sup>): 1133 (ν<sub>SOPH</sub>).

*cis-Dichloro[(S<sub>C</sub>S<sub>S</sub>)-1-(Phenyl)-2-(phenylsulfinyl)ethylamine]palladium (II), 14(S<sub>C</sub>S<sub>S</sub>)*

It was prepared following the general procedure from sulfinamide/sulfoxide ligand **8(R<sub>S</sub>,S<sub>C</sub>,R<sub>S</sub>)** (200 mg, 0.57 mmol) and Pd(CNCH<sub>3</sub>)<sub>2</sub>Cl<sub>2</sub> (206 mg, 0.57 mmol) in CH<sub>2</sub>Cl<sub>2</sub> (8 mL). After 48 h, the complex was precipitated with Et<sub>2</sub>O and filtered to give **14(S<sub>C</sub>S<sub>S</sub>)** (231 mg, 0.55 mmol, 96% yield) as a brown solid; mp: decomposes before melting; <sup>1</sup>H-NMR (500 MHz, CD<sub>3</sub>CN): δ 8.26-8.24 (m, 2H), 7.77-7.70 (m, 3H), 7.48-7.46 (m, 2H), 7.42-7.37 (m, 3H), 5.0 (bs, 1H), 4.87-4.79 (m, 2H), 3.89 (dd, J<sub>1</sub> = 13.5 Hz, J<sub>2</sub> = 13.5 Hz, 1H), 3.78-3.75 (m, 1H) ppm; <sup>13</sup>C-NMR (125 MHz, CD<sub>3</sub>CN): δ 139.9, 135.3, 135.1, 130.7, 130.4, 130.0, 128.3, 127.5, 71.5, 59.0 ppm. HRMS (ESI) m/z: [M+Na]<sup>+</sup> Calcd for C<sub>14</sub>H<sub>15</sub>ONCl<sub>2</sub>NaPdS 443.9178; found 443.9166; FTIR peaks (cm<sup>-1</sup>): 1138 (ν<sub>SOPH</sub>).

*cis-Dichloro[(S<sub>C</sub>R<sub>S</sub>)-1-(Phenyl)-2-(phenylsulfinyl)ethylamine]palladium (II), 14(S<sub>C</sub>R<sub>S</sub>)*

It was prepared following the general procedure from sulfinamide/sulfoxide ligand **8(R<sub>S</sub>,S<sub>C</sub>,S<sub>S</sub>)** (200 mg, 0.57 mmol) and Pd(CNCH<sub>3</sub>)<sub>2</sub>Cl<sub>2</sub> (206 mg, 0.57 mmol) in CH<sub>2</sub>Cl<sub>2</sub> (8 mL). After 48 h, the complex was precipitated with Et<sub>2</sub>O and filtered to give **14(S<sub>C</sub>R<sub>S</sub>)** (241 mg, 0.57 mmol, quant. yield) as a brown solid; mp: decomposes before melting; <sup>1</sup>H-NMR (500 MHz, CD<sub>3</sub>CN): δ 8.52-8.51 (m, 2H), 7.82-7.77 (m, 3H), 7.40-7.37 (m, 5H), 4.96 (bs, 1H), 4.76 (bs, 1H), 4.25 (dd, J<sub>1</sub> = 12.9 Hz, J<sub>2</sub> = 13.2 Hz, 1H), 3.96-3.88 (m, 2H) ppm; <sup>13</sup>C-NMR (125 MHz, CD<sub>3</sub>CN): δ 140.5, 135.7, 135.0, 131.1, 130.3, 130.0, 128.4,

128.3, 69.7, 56.8 ppm. HRMS (ESI)  $m/z$ :  $[M+Na]^+$  Calcd for  $C_{14}H_{15}ONCl_2NaPdS$  443.9178; found 443.9167; FTIR peaks ( $cm^{-1}$ ): 1125 ( $\nu_{SOPh}$ ).

It was also prepared following the general procedure from amine/sulfoxide ligand **24(S<sub>C</sub>,S<sub>S</sub>)** (20 mg, 0.08 mmol) and  $Pd(CNCH_3)_2Cl_2$  (29.3 mg, 0.08 mmol) in  $CH_2Cl_2$  (1.3 mL). After 2 h, the solvent was evaporated under reduced pressure to obtain **14(S<sub>C</sub>,R<sub>S</sub>)** (35 mg, 0.08 mmol, quant. yield) as a brown solid.

*cis-Dichloro[(S<sub>C</sub>S<sub>S</sub>)-3-methyl-1-(phenylsulfinyl)-2-butylamine]palladium (II), **15(S<sub>C</sub>,S<sub>S</sub>)***

It was prepared following the general procedure from sulfinamide/sulfoxide ligand **9(R<sub>S</sub>,S<sub>C</sub>,R<sub>S</sub>)** (200 mg, 0.63 mmol) and  $Pd(CNCH_3)_2Cl_2$  (228 mg, 0.63 mmol) in  $CH_2Cl_2$  (8 mL). After 48 h, the complex was precipitated with  $Et_2O$  and filtered to give **15(S<sub>C</sub>,S<sub>S</sub>)** (214 mg, 0.55 mmol, 88% yield) as a brown solid; mp: decomposes before melting;  $^1H$ -NMR (500 MHz,  $CD_3CN$ ):  $\delta$  8.19-8.17 (m, 2H), 7.77-7.69 (m, 3H), 4.52 (bs, 1H), 4.26 (bs, 1H), 3.60 (dt,  $J_1 = 2.8$ ,  $J_2 = 13.4$  Hz, 1H), 3.50-3.42 (m, 1H), 3.33 (dd,  $J_1 = 13.5$  Hz,  $J_2 = 13.5$  Hz, 1H), 2.04-1.97 (m, 1H), 1.02 (d,  $J = 6.9$  Hz, 3H), 0.94 (d,  $J = 6.9$  Hz, 3H) ppm;  $^{13}C$ -NMR (125 MHz,  $CD_3CN$ ):  $\delta$  140.1, 135.0, 130.6, 127.4, 70.0, 61.3, 32.1, 19.9, 19.4 ppm. HRMS (ESI)  $m/z$ :  $[M+Na]^+$  Calcd for  $C_{11}H_{17}ONCl_2NaPdS$  409.9335; found 409.9325; FTIR peaks ( $cm^{-1}$ ): 1141 ( $\nu_{SOPh}$ ).

*cis-Dichloro[(S<sub>C</sub>R<sub>S</sub>)-3-methyl-1-(phenylsulfinyl)-2-butylamine]palladium (II), **15(S<sub>C</sub>,R<sub>S</sub>)***

It was prepared following the general procedure from sulfinamide/sulfoxide ligand **9(R<sub>S</sub>,S<sub>C</sub>,S<sub>S</sub>)** (200 mg, 0.63 mmol) and  $Pd(CNCH_3)_2Cl_2$  (228 mg, 0.63 mmol) in  $CH_2Cl_2$  (8 mL). After 48 h, the complex was precipitated with  $Et_2O$  and filtered to give **15(S<sub>C</sub>,R<sub>S</sub>)** (235 mg, 0.6 mmol, 96% yield) as a brown solid; mp: decomposes before melting;  $^1H$ -NMR (500 MHz,  $CD_3CN$ ):  $\delta$  8.43-8.41 (m, 2H), 7.83-7.74 (m, 3H), 4.43 (bs, 1H), 4.22 (bs, 1H), 3.72-3.70 (m, 2H), 2.54-2.46 (m, 1H), 2.02-1.97 (m, 1H), 0.91 (d,  $J = 3.9$  Hz, 3H), 0.89 (d,  $J = 3.9$  Hz, 3H) ppm;  $^{13}C$ -NMR (125 MHz,  $CD_3CN$ ):  $\delta$  140.7, 135.6, 131.0, 128.2, 68.0, 58.9, 31.7, 19.5, 19.2 ppm. HRMS (ESI)  $m/z$ :  $[M+Na]^+$  Calcd for  $C_{11}H_{17}ONCl_2NaPdS$  409.9335; found 409.9323; FTIR peaks ( $cm^{-1}$ ): 1129 ( $\nu_{SOPh}$ ).

*cis-Dichloro[(S<sub>C</sub>S<sub>S</sub>)-1-(2-Naphthyl)-2-(tert-butylsulfinyl)ethylamine]palladium (II), **16(S<sub>C</sub>,S<sub>S</sub>)***

It was prepared following the general procedure from sulfinamide/sulfoxide ligand **10(R<sub>S</sub>,S<sub>C</sub>,R<sub>S</sub>)** (200 mg, 0.53 mmol) and  $Pd(CNCH_3)_2Cl_2$  (189 mg, 0.53 mmol) in  $CH_2Cl_2$  (8 mL). After 48 h, the complex was precipitated with  $Et_2O$  and filtered to give **16(S<sub>C</sub>,S<sub>S</sub>)** (219 mg, 0.48 mmol, 92% yield) as a brown solid; mp: decomposes before melting;  $^1H$ -NMR (500 MHz,  $CD_3CN$ ):  $\delta$  8.03 (bs, 1H), 7.95-7.90 (m, 3H), 7.60-7.56 (m, 3H), 4.92-4.81 (m, 2H), 4.57 (bs, 1H), 3.72 (dd,  $J_1 = 13.5$  Hz,  $J_2 = 13.5$  Hz, 1H), 3.39 (dt,  $J_1 = 3.1$  Hz,  $J_2 = 13.5$  Hz, 1H), 1.68 (s, 9H) ppm;  $^{13}C$ -NMR (125 MHz,  $CD_3CN$ ):  $\delta$  134.4, 134.0, 133.3, 129.7, 129.0, 128.7, 128.0, 127.9, 127.9, 125.7, 67.3, 60.9, 58.5, 24.0 ppm. HRMS (ESI)  $m/z$ :  $[M+Na]^+$  Calcd for  $C_{16}H_{21}ONCl_2NaPdS$  473.9648; found 473.9636; FTIR peaks ( $cm^{-1}$ ): 1124 ( $\nu_{SOtBu}$ ).

*cis*-Dichloro[(*S<sub>C</sub>R<sub>S</sub>*)-1-(2-Naphthyl)-2-(*tert*-butylsulfinyl)ethylamine]palladium (II), **16**(*S<sub>C</sub>R<sub>S</sub>*)

It was prepared following the general procedure from sulfinamide/sulfoxide ligand **10**(*R<sub>S</sub>,S<sub>C</sub>,S<sub>S</sub>*) (200 mg, 0.53 mmol) and Pd(CNCH<sub>3</sub>)<sub>2</sub>Cl<sub>2</sub> (189 mg, 0.53 mmol) in CH<sub>2</sub>Cl<sub>2</sub> (8 mL). After 24 h, the complex was precipitated with Et<sub>2</sub>O and filtered to give **16**(*S<sub>C</sub>R<sub>S</sub>*) (231 mg, 0.51 mmol, 97% yield) as a brown solid; mp: decomposes before melting; <sup>1</sup>H-NMR (500 MHz, CD<sub>3</sub>CN): δ 8.20 (bs, 1H), 7.97-7.91 (m, 3H), 7.69-7.67 (m, 1H), 7.58-7.57 (m, 2H), 4.91 (bs, 1H), 4.77 (bs, 1H), 4.42-4.37 (m, 1H), 4.03-3.99 (m, 1H), 3.78 (dd, *J*<sub>1</sub> = 9.6 Hz, *J*<sub>2</sub> = 14.4 Hz, 1H), 1.69 (s, 9H) ppm; <sup>13</sup>C-NMR (125 MHz, CD<sub>3</sub>CN): δ 134.3, 134.0, 133.9, 129.8, 129.0, 128.7, 128.0 (2), 127.4, 125.4, 68.8, 63.3, 58.5, 24.3 ppm. HRMS (ESI) *m/z*: [M+Na]<sup>+</sup> Calcd for C<sub>16</sub>H<sub>21</sub>ONCl<sub>2</sub>NaPdS 473.9648; found: 473.9637; FTIR peaks (cm<sup>-1</sup>): 1102 (ν<sub>S<sub>O</sub>tBu</sub>).

*cis*-Dichloro[(*S<sub>C</sub>S<sub>S</sub>*)-2-(*tert*-butylsulfinyl)-1-(phenyl)ethylamine]palladium (II), **17**(*S<sub>C</sub>,S<sub>S</sub>*)

It was prepared following the general procedure from sulfinamide/sulfoxide ligand **11**(*R<sub>S</sub>,S<sub>C</sub>,R<sub>S</sub>*) (100 mg, 0.3 mmol) and Pd(CNCH<sub>3</sub>)<sub>2</sub>Cl<sub>2</sub> (109 mg, 0.3 mmol) in CH<sub>2</sub>Cl<sub>2</sub> (4 mL). After 24 h, the complex was precipitated with Et<sub>2</sub>O and filtered to give **17**(*S<sub>C</sub>,S<sub>S</sub>*) (94 mg, 0.23 mmol, 78% yield) as a brown solid; mp: decomposes before melting; <sup>1</sup>H-NMR (500 MHz, CD<sub>3</sub>CN): δ 7.50-7.48 (m, 2H), 7.45-7.38 (m, 3H), 4.74-4.68 (m, 2H), 4.47 (bs, 1H), 3.60 (dd, *J*<sub>1</sub> = 13.6 Hz, *J*<sub>2</sub> = 13.6 Hz, 1H), 3.30 (dt, *J*<sub>1</sub> = 3.1 Hz, *J*<sub>2</sub> = 13.3 Hz, 1H), 1.66 (s, 9H) ppm; <sup>13</sup>C-NMR (125 MHz, CD<sub>3</sub>CN): δ 135.9, 130.3, 130.0, 128.4, 67.3, 60.9, 58.4, 24.0 ppm. HRMS (ESI) *m/z*: [M+Na]<sup>+</sup> Calcd for C<sub>12</sub>H<sub>19</sub>ONCl<sub>2</sub>NaPdS 423.9491; found 423.9478; FTIR peaks (cm<sup>-1</sup>): 1124 (ν<sub>S<sub>O</sub>tBu</sub>).

*cis*-Dichloro[(*S<sub>C</sub>R<sub>S</sub>*)-2-(*tert*-butylsulfinyl)-1-(phenyl)ethylamine]palladium (II), **17**(*S<sub>C</sub>,R<sub>S</sub>*)

It was prepared following the general procedure from sulfinamide/sulfoxide ligand **11**(*R<sub>S</sub>,S<sub>C</sub>,S<sub>S</sub>*) (200 mg, 0.61 mmol) and Pd(CNCH<sub>3</sub>)<sub>2</sub>Cl<sub>2</sub> (218 mg, 0.61 mmol) in CH<sub>2</sub>Cl<sub>2</sub> (8 mL). After 48 h, the complex was precipitated with Et<sub>2</sub>O and filtered to give **17**(*S<sub>C</sub>,R<sub>S</sub>*) (244 mg, 0.61 mmol, quant. yield) as a brown solid; mp: decomposes before melting; <sup>1</sup>H-NMR (500 MHz, CD<sub>3</sub>CN): δ 7.64 (d, *J* = 7.7 Hz, 2H), 7.48-7.45 (m, 2H), 4.42-7.39 (m, 1H), 4.81 (bs, 1H), 4.61 (bs, 1H), 4.26-4.21 (m, 1H), 3.91 (dd, *J*<sub>1</sub> = 4.8 Hz, *J*<sub>2</sub> = 14.3 Hz, 1H), 3.64 (dd, *J*<sub>1</sub> = 9.2 Hz, *J*<sub>2</sub> = 14.3 Hz, 1H), 1.66 (s, 9H) ppm; <sup>13</sup>C-NMR (125 MHz, CD<sub>3</sub>CN): δ 136.5, 130.1, 130.0, 128.0, 68.7, 63.4, 58.4, 24.3 ppm. HRMS (ESI) *m/z*: [M+Na]<sup>+</sup> Calcd for C<sub>12</sub>H<sub>19</sub>ONCl<sub>2</sub>NaPdS 423.9491; found 423.9479; FTIR peaks (cm<sup>-1</sup>): 1115 (ν<sub>S<sub>O</sub>tBu</sub>).

*cis*-Dichloro[(*S<sub>C</sub>S<sub>S</sub>*)-1-(*tert*-butylsulfinyl)-3-methyl-2-butylamine]palladium (II), **18**(*S<sub>C</sub>,S<sub>S</sub>*)

It was prepared following the general procedure from sulfinamide/sulfoxide ligand **12**(*R<sub>S</sub>,S<sub>C</sub>,R<sub>S</sub>*) (100 mg, 0.34 mmol) and Pd(CNCH<sub>3</sub>)<sub>2</sub>Cl<sub>2</sub> (122 mg, 0.34 mmol) in CH<sub>2</sub>Cl<sub>2</sub> (4 mL). After 48 h, the complex was precipitated with Et<sub>2</sub>O and filtered to give **18**(*S<sub>C</sub>,S<sub>S</sub>*) (119 mg, 0.32 mmol, 95% yield) as a brown solid; mp: decomposes before melting; <sup>1</sup>H-NMR (500 MHz, CD<sub>3</sub>CN): δ 4.25 (bs, 1H), 3.95 (bs, 1H), 3.38-3.31 (m, 1H), 3.10-3.08 (m, 2H), 2.03-1.99 (m, 1H), 1.62 (s, 9H), 1.01 (d, *J* = 6.8 Hz, 3H), 0.99 (d, *J* = 6.9 Hz, 3H) ppm; <sup>13</sup>C-NMR (125 MHz, CD<sub>3</sub>CN): δ 67.0, 60.5, 58.8, 32.2, 23.9, 19.8, 19.3 ppm. HRMS (ESI) *m/z*: [M+Na]<sup>+</sup> Calcd for C<sub>9</sub>H<sub>21</sub>ONCl<sub>2</sub>NaPdS 389.9648; found 389.9637; FTIR peaks (cm<sup>-1</sup>): 1121 (ν<sub>S<sub>O</sub>tBu</sub>).

*cis*-Dichloro[(*S<sub>C</sub>R<sub>S</sub>*)-1-(*tert*-butylsulfinyl)-3-methyl-2-butylamine]palladium (II), **18**(*S<sub>C</sub>R<sub>S</sub>*)  
It was prepared following the general procedure from sulfinamide/sulfoxide ligand **12**(*R<sub>S</sub>S<sub>C</sub>S<sub>S</sub>*) (200 mg, 0.68 mmol) and Pd(CNCH<sub>3</sub>)<sub>2</sub>Cl<sub>2</sub> (243 mg, 0.68 mmol) in CH<sub>2</sub>Cl<sub>2</sub> (8 mL). After 24 h, the complex was precipitated with Et<sub>2</sub>O and filtered to give **18**(*S<sub>C</sub>R<sub>S</sub>*) (199 mg, 0.54 mmol, 80% yield) as a brown solid; mp: decomposes before melting; <sup>1</sup>H-NMR (500 MHz, CD<sub>3</sub>CN): δ 4.43 (bs, 1H), 4.17 (bs, 1H), 3.47 (dd, *J*<sub>1</sub> = 4.7 Hz, *J*<sub>2</sub> = 14.4 Hz, 1H), 3.29 (ddd, *J*<sub>1</sub> = 1.4 Hz, *J*<sub>2</sub> = 6.0 Hz, *J*<sub>3</sub> = 14.4 Hz, 1H), 2.81-2.77 (m, 1H), 2.38-2.31 (m, 1H), 1.62 (s, 9H), 1.08 (d, *J* = 6.7 Hz, 3H), 1.03 (d, *J* = 6.7 Hz, 3H) ppm; <sup>13</sup>C-NMR (125 MHz, CD<sub>3</sub>CN): δ 68.2, 61.4, 59.9, 32.2, 24.2, 19.6, 19.3 ppm. HRMS (ESI) *m/z*: [M+Na]<sup>+</sup> Calcd for C<sub>9</sub>H<sub>21</sub>ONCl<sub>2</sub>NaPdS 389.9648; found 389.9636; FTIR peaks (cm<sup>-1</sup>): 1121 (ν<sub>SO<sub>t</sub>Bu</sub>).

*cis*-Dichloro[(*S<sub>C</sub>R<sub>S</sub>*)/(*S<sub>C</sub>S<sub>S</sub>*)-1-(2-Naphthyl)-2-(*tert*-butylsulfonyl)ethylamine]palladium (II), **22**(*S<sub>C</sub>R<sub>S</sub>*)/(*S<sub>C</sub>S<sub>S</sub>*)

It was prepared following the general procedure from sulfinamide/sulfone ligand **21**(*R<sub>S</sub>S<sub>C</sub>*) (200 mg, 0.51 mmol) and Pd(CNCH<sub>3</sub>)<sub>2</sub>Cl<sub>2</sub> (182 mg, 0.51 mmol) in CH<sub>2</sub>Cl<sub>2</sub> (8 mL). After 48 h, the complex was precipitated with Et<sub>2</sub>O and filtered to give **22**(*S<sub>C</sub>R<sub>S</sub>*)/(*S<sub>C</sub>S<sub>S</sub>*) (237 mg, 0.51 mmol, quant. yield) as a brown solid; mp: decomposes before melting; <sup>1</sup>H-NMR (500 MHz, CD<sub>3</sub>CN): δ 8.20 (bs, 1H), 8.10 (bs, 1H), 8.03-7.99 (m, 3H), 7.97-7.93 (m, 3H), 7.73 (dd, *J*<sub>1</sub> = 1.6 Hz, *J*<sub>2</sub> = 8.6 Hz, 1H), 7.69 (dd, *J*<sub>1</sub> = 1.8 Hz, *J*<sub>2</sub> = 8.5 Hz, 1H), 7.61-7.57 (m, 4H), 5.26-5.25 (m, 1H), 5.06-5.01 (m, 1H), 4.18 (dd, *J*<sub>1</sub> = 9.3 Hz, *J*<sub>2</sub> = 14.1 Hz, 1H), 3.94 (dd, *J*<sub>1</sub> = 9.3 Hz, *J*<sub>2</sub> = 14.2 Hz, 1H), 3.68 (dd, *J*<sub>1</sub> = 4.0 Hz, *J*<sub>2</sub> = 14.2 Hz, 1H), 3.35 (dd, *J*<sub>1</sub> = 3.7 Hz, *J*<sub>2</sub> = 14.1 Hz, 1H), 1.42 (s, 9H), 1.37 (s, 9H) ppm; <sup>13</sup>C-NMR (125 MHz, CD<sub>3</sub>CN): δ 137.1, 134.6, 134.3, 134.2, 133.9, 132.5, 130.1, 129.5, 129.3, 129.1, 129.0, 128.9, 128.7 (2), 128.4, 128.0, 127.8, 127.7, 126.6, 125.9, 61.3, 60.7, 54.8, 51.8, 50.8, 48.8, 23.2 (2) ppm. HRMS (ESI) *m/z*: [M+Na]<sup>+</sup> Calcd for C<sub>16</sub>H<sub>21</sub>O<sub>2</sub>NCl<sub>2</sub>NaPdS 489.9597; found 489.9591; FTIR peaks (cm<sup>-1</sup>): 1108 (ν<sub>SO<sub>2</sub>tBu</sub>).

### Synthesis of amine/sulfoxide ligands.

#### Method A: Desulfinylation of sulfinamide/sulfoxide ligands: general procedure.

To a solution of the corresponding ligand in dry MeOH at 0°C under argon atmosphere, trifluoroacetic acid (3500 mol%) was added dropwise. The reaction mixture was slowly warmed to room temperature. Once the starting material was consumed, the solvent was evaporated under reduced pressure. The residue was dissolved in 0.3 mL dry MeOH and passed through a cation-exchange column (Isolute SPE SCX-2) to give the corresponding amine.

#### Method B: Displacement of the amine/sulfoxide ligand from Pd complexes: general procedure.

To a solution of the corresponding Pd complex (100 mol%) in dry CH<sub>2</sub>Cl<sub>2</sub> under argon atmosphere, *N,N,N',N'*-tetramethylethylenediamine (100 mol%) was added dropwise. The reaction mixture was stirred 1 h at room temperature. Then, the reaction mixture was passed through a cation-exchange column (Isolute SPE SCX-2) to give the corresponding amine.

*(S<sub>C</sub>R<sub>S</sub>)-1-(2-Naphthyl)-2-(tert-butylsulfinyl)ethylamine, 24(S<sub>C</sub>R<sub>S</sub>)*

**Method A:** It was prepared following the general procedure from **10(R<sub>S</sub>,S<sub>C</sub>,R<sub>S</sub>)** (100 mg, 0.26 mmol), trifluoroacetic acid (0.86 mL, 11.2 mmol) and MeOH (1 mL). After five days, the residue was passed through a cation-exchange column (Isolute SPE SCX-2) to give the corresponding amine **24(S<sub>S</sub>,R<sub>C</sub>)** (44 mg, 0.16 mmol, 62% yield) as an orange oil;  $[\alpha]_D^{20}$ : +17.5 (c 1, MeOH); <sup>1</sup>H-NMR (500 MHz, MeOD): δ 7.91-7.84 (m, 4H), 7.56 (dd,  $J_1$  = 1.8 Hz,  $J_2$  = 8.5 Hz, 1H), 7.51-7.46 (m, 2H), 4.58 (dd,  $J_1$  = 3.1 Hz,  $J_2$  = 10.3 Hz, 1H), 2.98 (AB fragment of an ABX system,  $\Delta\nu$  = 130 Hz,  $J_{AX}$  = 10.3 Hz,  $J_{BX}$  = 3.1 Hz,  $J_{AB}$  = 13.1 Hz, 2H), 1.28 (s, 9H) ppm; <sup>13</sup>C-NMR (125 MHz, MeOD): δ 142.2, 135.0, 134.5, 129.7, 129.0, 128.7, 127.4, 127.1, 126.1, 125.6, 55.6, 54.3, 52.3, 23.0 ppm; HRMS (ESI) m/z: [M+H]<sup>+</sup> Calcd for C<sub>16</sub>H<sub>22</sub>ONS 276.1417; found 276.1420.

*(S<sub>C</sub>S<sub>S</sub>)-1-(2-Naphthyl)-2-(tert-butylsulfinyl)ethylamine, 24(S<sub>C</sub>S<sub>S</sub>)*

**Method A:** It was prepared following the general procedure from **10(R<sub>S</sub>,S<sub>C</sub>,S<sub>S</sub>)** (100 mg, 0.26 mmol), trifluoroacetic acid (0.86 mL, 11.2 mmol) and MeOH (1 mL). After five days, the residue was passed through a cation-exchange column (Isolute SPE SCX-2) to give the corresponding amine **24(S<sub>S</sub>,S<sub>C</sub>)** (64 mg, 0.23 mmol, 88% yield) as an orange oil;  $[\alpha]_D^{20}$ : -55.5 (c 1, MeOH); <sup>1</sup>H-NMR (500 MHz, MeOD): δ 7.92-7.85 (m, 4H), 7.59 (dd,  $J_1$  = 1.7 Hz,  $J_2$  = 8.5 Hz, 1H), 7.52-7.47 (m, 2H), 4.59 (dd,  $J_1$  = 5.9 Hz,  $J_2$  = 8.7 Hz, 1H), 3.11 (AB fragment of an ABX system,  $\Delta\nu$  = 25 Hz,  $J_{AX}$  = 8.7 Hz,  $J_{BX}$  = 5.9 Hz,  $J_{AB}$  = 12.9 Hz, 2H), 1.22 (s, 9H) ppm; <sup>13</sup>C-NMR (125 MHz, MeOD): δ 140.5, 134.9, 134.7, 129.9, 129.0, 128.7, 127.4 (2), 127.3, 125.4, 54.6, 53.8, 53.7, 22.8 ppm; HRMS (ESI) m/z: [M+H]<sup>+</sup> Calcd for C<sub>16</sub>H<sub>22</sub>ONS 276.1417; found 276.1418.

**Method B:** It was prepared following the general procedure from **16(S<sub>C</sub>,R<sub>S</sub>)** (40 mg, 0.09 mmol), *N,N,N',N'*-tetramethylethylenediamine (13 μL, 0.09 mmol) and CH<sub>2</sub>Cl<sub>2</sub> (2 mL). It was obtained the corresponding amine **24(S<sub>S</sub>,S<sub>C</sub>)** (15 mg, 0.05 mmol, 68% yield) as an orange oil.

*(S<sub>C</sub>S<sub>S</sub>)-1-Phenyl-2-(phenylsulfinyl)ethylamine, 19(S<sub>C</sub>S<sub>S</sub>)*

**Method A:** It was prepared following the general procedure from **8(R<sub>S</sub>,S<sub>C</sub>,S<sub>S</sub>)** (100 mg, 0.29 mmol), trifluoroacetic acid (0.33 mL, 4.35 mmol, 1500 mol%) and MeOH (1 mL). After two days, the residue was passed through a cation-exchange column (Isolute SPE SCX-2) to give the corresponding amine **19(S<sub>S</sub>,S<sub>C</sub>)** (45.1 mg, 0.18 mmol, 64% yield) as a crystalline solid; mp 93-95 °C;  $[\alpha]_D^{20}$ : -88.2 (c 1, MeOH); <sup>1</sup>H-NMR (500 MHz, CDCl<sub>3</sub>): δ 7.65-7.63 (m, 2H), 7.52-7.48 (m, 3H), 7.39-7.33 (m, 4H), 7.29-7.28 (m, 1H), 4.57 (dd,  $J_1$  = 5.1 Hz,  $J_2$  = 8.3 Hz), 3.07 (AB fragment of an ABX system,  $\Delta\nu$  = 135 Hz,  $J_{AX}$  = 8.4 Hz,  $J_{BX}$  = 5.0 Hz,  $J_{AB}$  = 13.1 Hz, 2H), 1.97 (bs, 2H) ppm; <sup>13</sup>C-NMR (125 MHz, CDCl<sub>3</sub>): δ 144.5, 143.9, 131.3, 129.5, 129.0, 128.0, 126.5, 124.1, 66.7, 53.1 ppm; HRMS (ESI) m/z: [M+H]<sup>+</sup> Calcd for C<sub>14</sub>H<sub>16</sub>ONS 246.0947; found 246.0947.

**Method B:** It was prepared following the general procedure from **14(S<sub>C</sub>,R<sub>S</sub>)** (40 mg, 0.09 mmol), *N,N,N',N'*-tetramethylethylenediamine (14 μL, 0.09 mmol) and CH<sub>2</sub>Cl<sub>2</sub> (2 mL). It was obtained the corresponding amine **19(S<sub>S</sub>,S<sub>C</sub>)** (23 mg, 0.09 mmol, quant. yield) as a crystalline solid.

*(S<sub>C</sub>R<sub>S</sub>)-1-(Phenylsulfinyl)-3-methylbut-2-ylamine, 23(S<sub>C</sub>R<sub>S</sub>)*

**Method A:** It was prepared following the general procedure from **9(R<sub>S</sub>,S<sub>C</sub>R<sub>S</sub>)** (100 mg, 0.32 mmol), trifluoroacetic acid (0.86 mL, 11.2 mmol) and MeOH (3 mL). After seven days, the residue was passed through a cation-exchange column (Isolute SPE SCX-2) to give the corresponding amine **23(S<sub>S</sub>,R<sub>C</sub>)** (31.4 mg, 0.15 mmol, 46% yield) as a colorless oil;  $[\alpha]_D^{20}$ : +169.6 (c 1, MeOH); <sup>1</sup>H-NMR (500 MHz, MeOD): δ 7.74-7.72 (m, 2H), 7.64-7.57 (m, 3H), 3.17 (ddd,  $J_1 = 2.1$  Hz,  $J_2 = 10.0$  Hz,  $J_3 = 5.1$  Hz, 1H), 3.00 (AB fragment of an ABX system,  $\Delta\nu = 65$  Hz,  $J_{AX} = 10.1$  Hz,  $J_{BX} = 2.2$  Hz,  $J_{AB} = 13.8$  Hz, 2H), 1.95 (bs, 2H), 1.83 (oct,  $J = 6.8$  Hz, 1H), 0.92 (d,  $J = 6.8$  Hz, 3H), 0.88 (d,  $J = 6.8$  Hz, 3H) ppm; <sup>13</sup>C-NMR (125 MHz, MeOD): δ 143.8, 132.6, 130.7, 125.3, 60.0, 53.1, 33.9, 18.2 (2) ppm; HRMS (ESI) m/z: [M+H]<sup>+</sup> Calcd for C<sub>11</sub>H<sub>18</sub>ONS 212.1104; found 212.1101.

**Method B:** It was prepared following the general procedure from **15(S<sub>C</sub>,S<sub>S</sub>)** (40 mg, 0.10 mmol), *N,N,N',N'*-tetramethylethylenediamine (16 μL, 0.10 mmol) and CH<sub>2</sub>Cl<sub>2</sub> (2 mL). It was obtained the corresponding amine **23(S<sub>S</sub>,R<sub>C</sub>)** (22 mg, 0.10 mmol, quant. yield) as a colorless solid.

**Acetylation of amine/sulfoxide ligands: general procedure.**

To a solution of the corresponding ligand and triethylamine (Et<sub>3</sub>N) (300 mol%) in dry CH<sub>2</sub>Cl<sub>2</sub> at 0°C under argon atmosphere, acetyl chloride (200 mol%) was added dropwise. The reaction mixture was slowly warmed to room temperature. After stirring for 30 min, the reaction was quenched with saturated aqueous NH<sub>4</sub>Cl solution, and the aqueous phase was extracted with CH<sub>2</sub>Cl<sub>2</sub> (3 x 20 mL). The combined organic phases were washed with saturated aqueous NaHCO<sub>3</sub> and NaCl solution and dried with anhydrous Na<sub>2</sub>SO<sub>4</sub>. The solvent was evaporated under reduced pressure and the reaction crude was purified by flash chromatography to obtain the desired compound.

*(S<sub>C</sub>S<sub>S</sub>)-N-Acetyl-1-phenyl-2-(phenylsulfinyl)ethylamine, 25(S<sub>C</sub>,S<sub>S</sub>)*

It was prepared following the general procedure from **19(S<sub>S</sub>,S<sub>C</sub>)** (23 mg, 0.09 mmol), Et<sub>3</sub>N (39 μL, 0.28 mmol), acetyl chloride (13 μL, 0.19 mmol) and CH<sub>2</sub>Cl<sub>2</sub> (2 mL). The resulting residue was purified by flash chromatography (CH<sub>2</sub>Cl<sub>2</sub>:MeOH, 20:1) to give the corresponding amide **25(S<sub>S</sub>,S<sub>C</sub>)** (27 mg, 0.09 mmol, quant. yield) as a colorless solid; mp 172-174 °C;  $[\alpha]_D^{20}$ : -63.8 (c 1, CHCl<sub>3</sub>); <sup>1</sup>H-NMR (500 MHz, CDCl<sub>3</sub>): δ 7.69-7.68 (m, 2H), 7.54-7.50 (m, 3H), 7.32-7.26 (m, 5H), 6.71 (d,  $J = 6.6$  Hz, 1H), 5.43 (m, 1H), 3.23 (AB fragment of an ABX system,  $\Delta\nu = 90$  Hz,  $J_{AX} = 10.3$  Hz,  $J_{BX} = 4.9$  Hz,  $J_{AB} = 13.6$  Hz, 2H), 2.06 (s, 3H), 1.27 (s, 9H) ppm; <sup>13</sup>C-NMR (125 MHz, CDCl<sub>3</sub>): δ 170.0, 143.8, 140.3, 131.6, 129.6, 129.1, 128.2, 126.5, 124.2, 63.9, 51.1, 23.5 ppm; HRMS (ESI) m/z: [M+Na]<sup>+</sup> Calcd for C<sub>16</sub>H<sub>17</sub>O<sub>2</sub>NNaS 310.0872; found 310.0870.

*(S<sub>C</sub>R<sub>S</sub>)-N-Acetyl-1-(Phenylsulfinyl)-3-methylbut-2-ylamine, 26(S<sub>C</sub>,R<sub>S</sub>)*

It was prepared following the general procedure from **23(S<sub>S</sub>,R<sub>C</sub>)** (22 mg, 0.10 mmol), Et<sub>3</sub>N (43 μL, 0.31 mmol), acetyl chloride (15 μL, 0.21 mmol) and CH<sub>2</sub>Cl<sub>2</sub> (2 mL). The resulting residue was purified by flash chromatography (CH<sub>2</sub>Cl<sub>2</sub>:MeOH, 15:1) to give the corresponding amide **26(S<sub>S</sub>,R<sub>C</sub>)** (19 mg, 0.07 mmol, 73% yield) as a white solid; mp 158-160 °C;  $[\alpha]_D^{20}$ : +80.6 (c 1, CHCl<sub>3</sub>); <sup>1</sup>H-NMR (500 MHz, CDCl<sub>3</sub>): δ 7.64-7.62 (m, 2H), 7.55-7.52 (m, 3H), 6.58 (d,  $J = 8.5$  Hz, 1H), 4.12-4.06 (m, 1H), 3.01 (AB fragment of an ABX system,  $\Delta\nu = 45$  Hz,  $J_{AX} = 6.7$  Hz,  $J_{BX} = 3.4$  Hz,  $J_{AB} = 13.6$  Hz, 2H), 2.32-2.24 (m, 1H),

2.10 (s, 3H), 1.06 (d,  $J = 6.7$  Hz, 3H), 1.01 (d,  $J = 6.7$  Hz, 3H) ppm;  $^{13}\text{C-NMR}$  (125 MHz,  $\text{CDCl}_3$ ):  $\delta$  170.1, 143.8, 131.5, 129.6, 124.0, 59.6, 53.1, 31.5, 23.7, 19.8, 19.6 ppm; HRMS (ESI)  $m/z$ :  $[\text{M}+\text{Na}]^+$  Calcd for  $\text{C}_{13}\text{H}_{19}\text{O}_2\text{NNaS}$  276.1029; found 276.1029.

*(S<sub>C</sub>R<sub>S</sub>)-N-Acetyl-1-(2-naphthyl)-2-(tert-butylsulfinyl)ethylamine, 27(S<sub>C</sub>R<sub>S</sub>)*

It was prepared following the general procedure from **24(S<sub>S</sub>R<sub>C</sub>)** (43 mg, 0.16 mmol),  $\text{Et}_3\text{N}$  (66  $\mu\text{L}$ , 0.47 mmol), acetyl chloride (22  $\mu\text{L}$ , 0.31 mmol) and  $\text{CH}_2\text{Cl}_2$  (4 mL). The resulting residue was purified by flash chromatography ( $\text{CH}_2\text{Cl}_2$ :MeOH, 20:1) to give the corresponding amide **27(S<sub>S</sub>R<sub>C</sub>)** (49 mg, 0.15 mmol, 98% yield) as a yellow oil;  $[\alpha]_{\text{D}}^{20}$ : +115.7 ( $c$  1,  $\text{CHCl}_3$ );  $^1\text{H-NMR}$  (500 MHz,  $\text{CDCl}_3$ ):  $\delta$  7.94 (d,  $J = 7.8$  Hz, 1H), 7.86-7.82 (m, 4H), 7.50-7.47 (m, 3H), 5.89-5.86 (m, 1H), 3.03 (AB fragment of an ABX system,  $\Delta\nu = 55$  Hz,  $J_{\text{AX}} = 3.6$  Hz,  $J_{\text{BX}} = 5.3$  Hz,  $J_{\text{AB}} = 13.0$  Hz, 2H), 2.10 (s, 3H), 1.20 (s, 9H) ppm;  $^{13}\text{C-NMR}$  (125 MHz,  $\text{CDCl}_3$ ):  $\delta$  169.7, 137.0, 133.5, 133.1, 128.8, 128.3, 127.8, 126.5, 126.3, 125.5, 124.5, 53.6, 51.2, 49.5, 23.7, 22.8 ppm; HRMS (ESI)  $m/z$ :  $[\text{M}+\text{Na}]^+$  Calcd for  $\text{C}_{18}\text{H}_{23}\text{O}_2\text{NNaS}$  340.1342; found 340.1335.

*(S<sub>C</sub>S<sub>S</sub>)-N-Acetyl-1-(2-naphthyl)-2-(tert-butylsulfinyl)ethylamine, 27(S<sub>C</sub>S<sub>S</sub>)*

It was prepared following the general procedure from **24(S<sub>S</sub>S<sub>C</sub>)** (60 mg, 0.22 mmol),  $\text{Et}_3\text{N}$  (66  $\mu\text{L}$ , 0.65 mmol), acetyl chloride (34  $\mu\text{L}$ , 0.44 mmol) and  $\text{CH}_2\text{Cl}_2$  (6 mL). The resulting residue was purified by flash chromatography ( $\text{CH}_2\text{Cl}_2$ :MeOH, 20:1) to give the corresponding amide **27(S<sub>S</sub>S<sub>C</sub>)** (67 mg, 0.21 mmol, 97% yield) as a yellow solid; mp 186-188 °C;  $[\alpha]_{\text{D}}^{20}$ : +36.2 ( $c$  1,  $\text{CHCl}_3$ );  $^1\text{H-NMR}$  (500 MHz,  $\text{CDCl}_3$ ):  $\delta$  7.86-7.81 (m, 4H), 7.49-7.43 (m, 3H), 6.96 (d,  $J = 5.5$  Hz, 1H), 5.56-5.52 (m, 1H), 2.93 (AB fragment of an ABX system,  $\Delta\nu = 105$  Hz,  $J_{\text{AX}} = 5.2$  Hz,  $J_{\text{BX}} = 11.1$  Hz,  $J_{\text{AB}} = 13.5$  Hz, 2H), 2.06 (s, 3H), 1.27 (s, 9H) ppm;  $^{13}\text{C-NMR}$  (125 MHz,  $\text{CDCl}_3$ ):  $\delta$  170.2, 138.6, 133.5, 133.2, 129.1, 128.1, 127.8, 126.6, 126.4, 125.4, 124.1, 54.1, 52.7, 52.2, 23.5, 22.9 ppm; HRMS (ESI)  $m/z$ :  $[\text{M}+\text{Na}]^+$  Calcd for  $\text{C}_{18}\text{H}_{23}\text{O}_2\text{NNaS}$  340.1342; found 340.1336.

### Catalysis: Asymmetric arylation of cyclopropane:

*N-(2,3,4,5,6-pentafluorophenyl)-cyclopropanecarboxamide, 32*

To a solution of 2,3,4,5,6-pentafluoroaniline (2 g, 10.92 mmol, 100 mol%) in 25 mL of dried toluene, cyclopropanecarbonyl chloride (1 mL, 10.92 mmol, 100 mol%) was added dropwise under vigorous stirring. The resulting mixture was stirred 24 h at reflux. Upon cooling at 0°C, the crystallization of the compound from the reaction medium takes place to give **32** (2.4 g, 9.59 mmol, 88% yield) as a white solid;  $^1\text{H-NMR}$  (300 MHz,  $\text{CDCl}_3$ ):  $\delta$  6.90 (bs, 1H), 1.66-1.58 (m, 1H), 1.16-1.11 (m, 2H), 0.98-0.91 (m, 2H); other data match the reported ones.<sup>3</sup>



*(1R,2S)*-*N*-(2,3,4,5-pentafluorophenyl)-2-(*p*-tolyl)cyclopropane-1-carboxamide,  
**34(1R,2S)**

*N*-(2,3,4,5,6-pentafluorophenyl)-cyclopropanecarboxamide **32** (50 mg, 0.20 mmol, 100 mol%), 4-iodotoluene (87 mg, 0.40 mmol, 200 mol%), silver carbonate (110 mg, 0.40 mmol, 200 mol%), sodium trifluoroacetate (14 mg, 0.10 mmol, 50 mol%), palladium(II) trifluoroacetate (10 mg, 0.030 mmol, 15 mol%) and appropriate ligand (15 mol%) were weighted in a pressure tube. Hexane (1.3 mL) and CHCl<sub>3</sub> (0.7 mL) were added and the reaction mixture was stirred at 80 °C or 110 °C during 48 h. After cooling to room temperature, the mixture was filtered with 0.2 μm PTFE membrane, washed with chloroform and evaporated under reduced pressure. Conversion was determined by <sup>1</sup>H-NMR spectroscopy of the crude reaction mixture. The crude was purified by preparative thin layer chromatography (toluene:EtOAc, 20:1) to give **34** as a white solid; <sup>1</sup>H-NMR (500 MHz, CDCl<sub>3</sub>): δ 7.17 (d, *J* = 8.1 Hz, 2H), 7.08 (d, *J* = 7.9 Hz, 2H), 6.63 (bs, 1H), 2.64 (q, *J* = 8.4 Hz, 1H), 2.29 (s, 3H), 2.15-2.10 (m, 1H), 1.81 (dt, *J*<sub>1</sub> = 5.4 Hz, *J*<sub>2</sub> = 7.5 Hz, 1H), 1.44 (dt, *J*<sub>1</sub> = 8.3 Hz, *J*<sub>2</sub> = 5.3 Hz, 1H) ppm; <sup>13</sup>C-NMR (125 MHz, CDCl<sub>3</sub>): δ 168.4, 136.8, 132.6, 129.2, 129.0, 29.9, 25.9, 21.3, 11.5 ppm, carbons corresponding to the pentafluoroamide moiety are not reported; other data match the reported ones. Enantiomeric rate was determined by chiral HPLC using CHIRALPAK® ADH column (n-hexane/isopropanol 95:5; 0.5 mL/min.; 23 °C) *t*<sub>R</sub> = 25.33 min. ((1*S*,2*R*)-isomer), *t*<sub>R</sub> = 43.42 min. ((1*R*,2*S*)-isomer).<sup>4</sup>

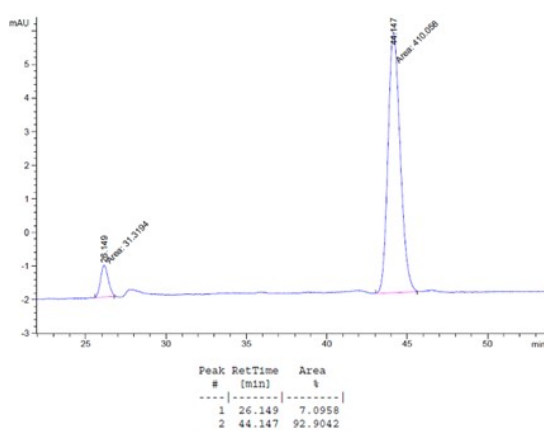

**34(1R,2S)** obtained with **25(S<sub>C</sub>S<sub>S</sub>)** at 80 °C

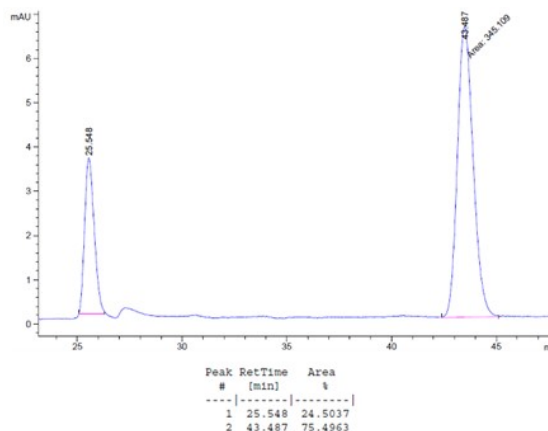

**34(1R,2S)** obtained with **26(S<sub>C</sub>R<sub>S</sub>)** at 80 °C

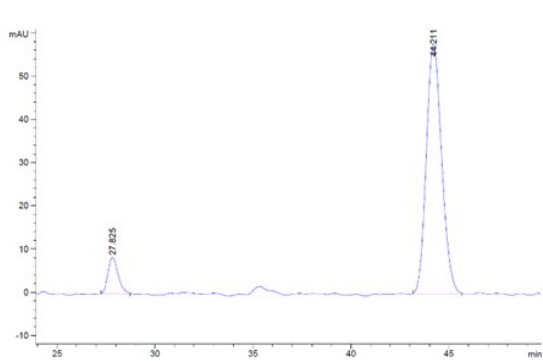

| Peak # | RetTime [min] | Area %  |
|--------|---------------|---------|
| 1      | 27.825        | 8.7605  |
| 2      | 44.211        | 91.2395 |

**34(1R,2S)** obtained with **25(S<sub>C</sub>,S<sub>S</sub>)** at 110 °C

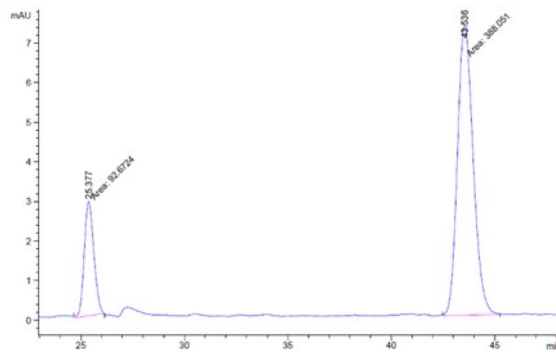

| Peak # | RetTime [min] | Area %  |
|--------|---------------|---------|
| 1      | 25.377        | 19.2777 |
| 2      | 43.536        | 80.7223 |

**34(1R,2S)** obtained with **26(S<sub>C</sub>,R<sub>S</sub>)** at 110 °C

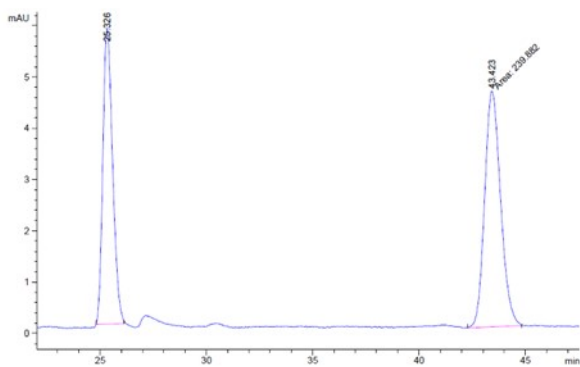

| Peak # | RetTime [min] | Area %  |
|--------|---------------|---------|
| 1      | 25.326        | 43.4078 |
| 2      | 43.423        | 56.5922 |

**34(1R,2S)** obtained with **27(S<sub>C</sub>,R<sub>S</sub>)** at 110 °C

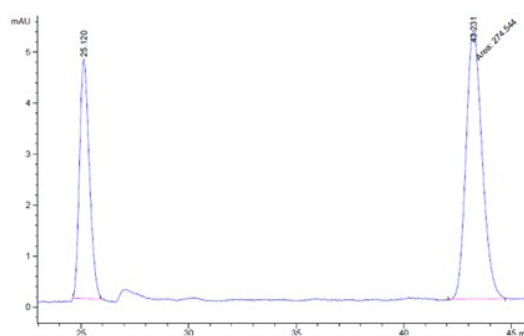

| Peak # | RetTime [min] | Area %  |
|--------|---------------|---------|
| 1      | 25.120        | 35.1832 |
| 2      | 43.231        | 64.8168 |

**34(1R,2S)** obtained with **27(S<sub>C</sub>,S<sub>S</sub>)** at 110 °C

**<sup>1</sup>H-NMR, <sup>13</sup>C-NMR of selected compounds**

Methyl sulfinyl chloride, **35**

<sup>1</sup>H-NMR (300 MHz, CDCl<sub>3</sub>)

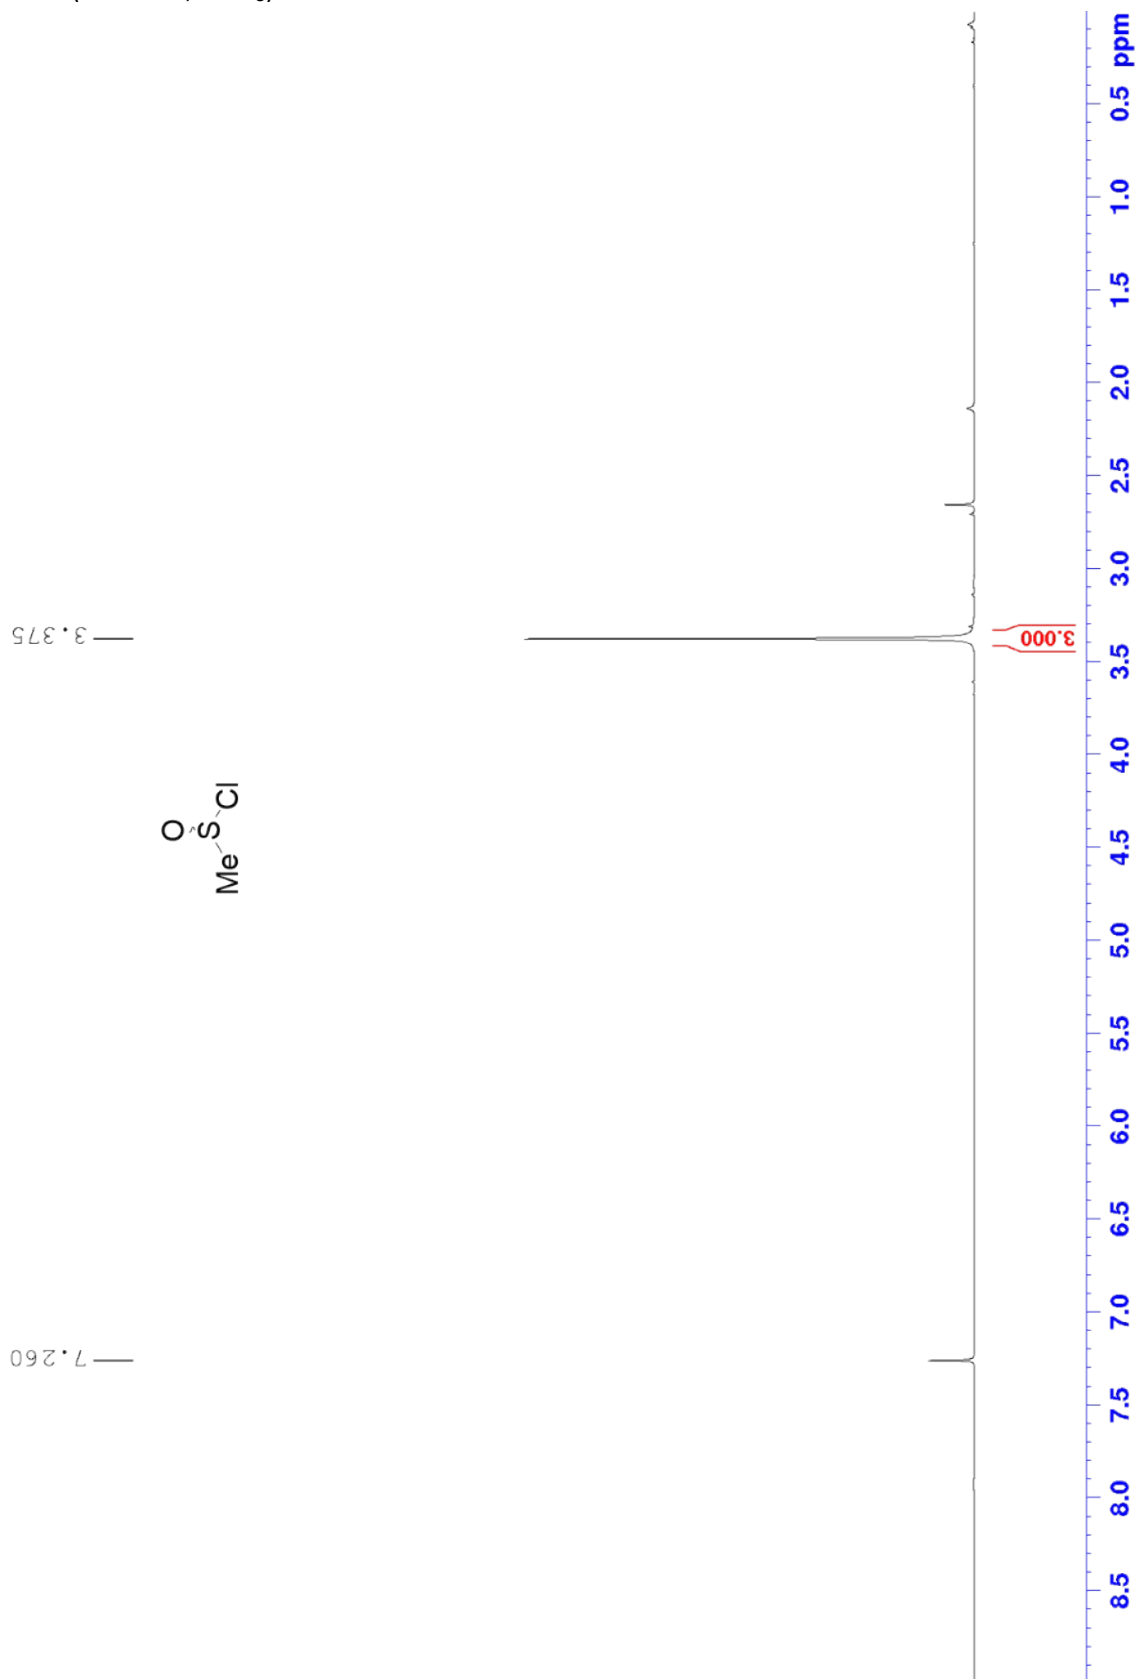

1,2:5,6-Di-O-isopropylidene- $\alpha$ -D-glucofuranosyl (+)-(R)-Methanesulfinic acid, **1**(R<sub>S</sub>)

<sup>1</sup>H-NMR (300 MHz, CDCl<sub>3</sub>)

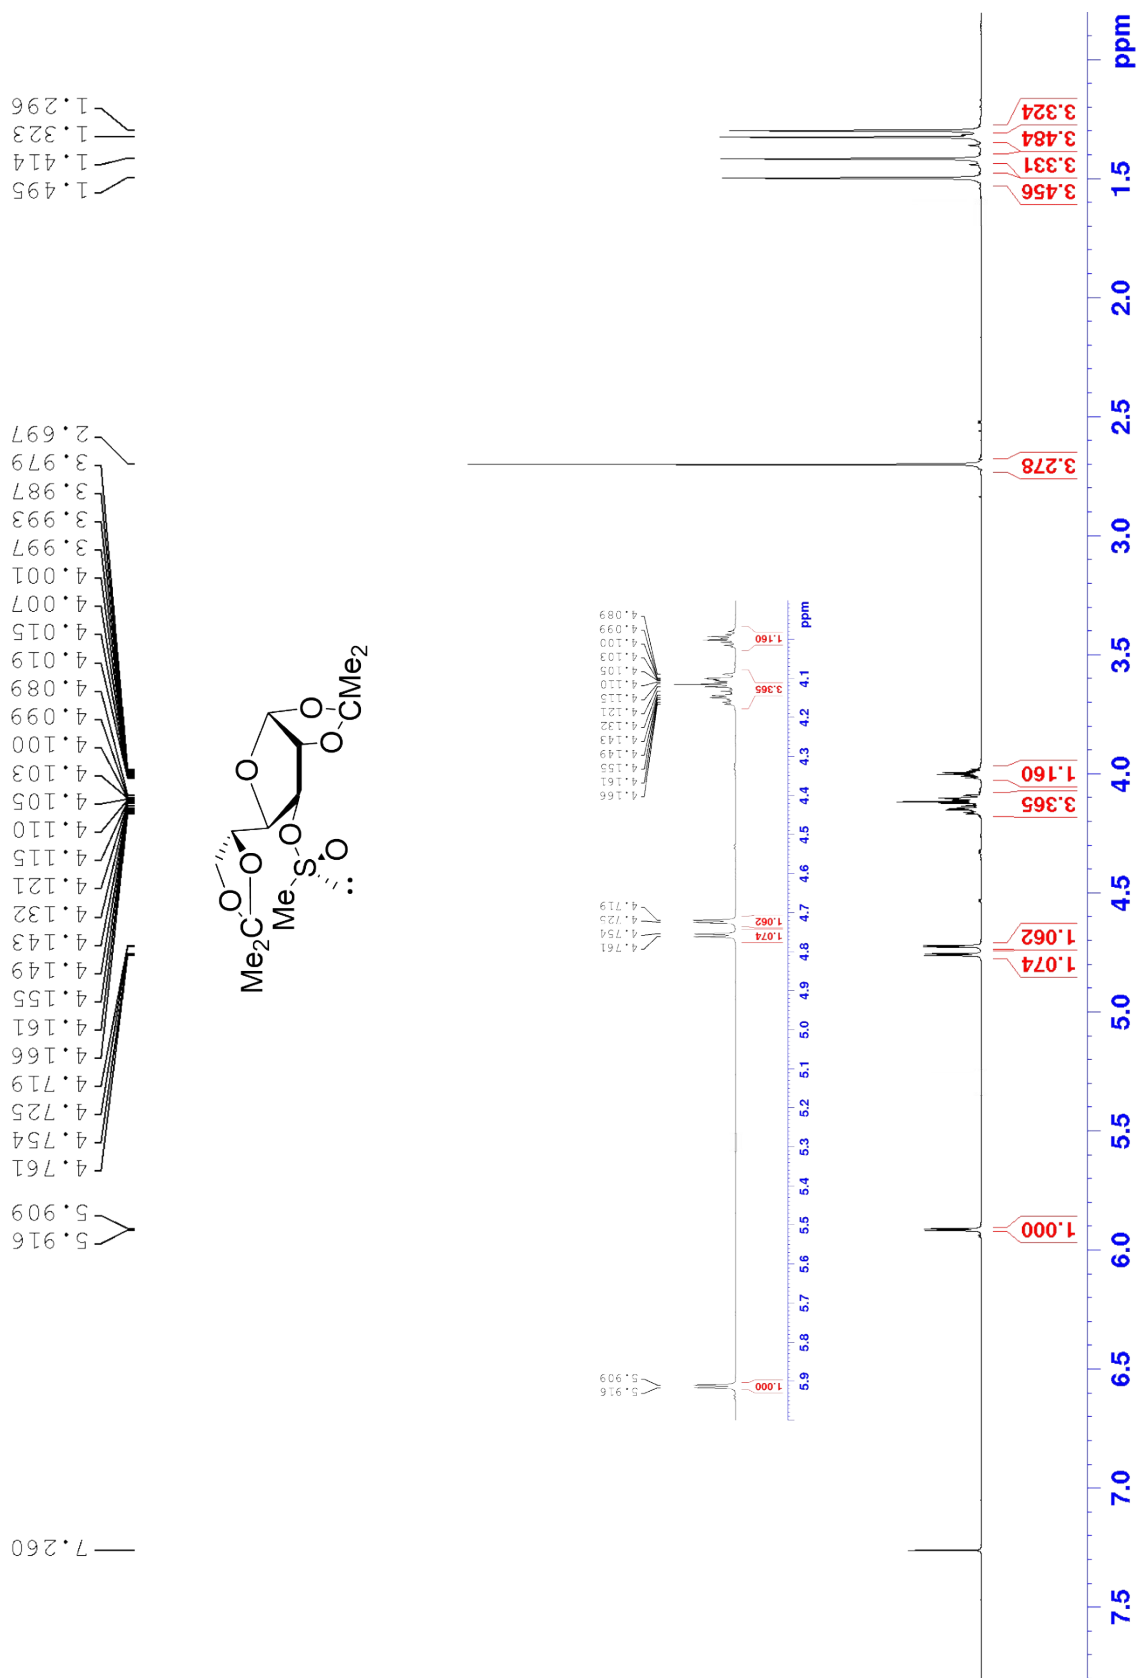

$^{13}\text{C-NMR}$  (500 MHz,  $\text{CDCl}_3$ )

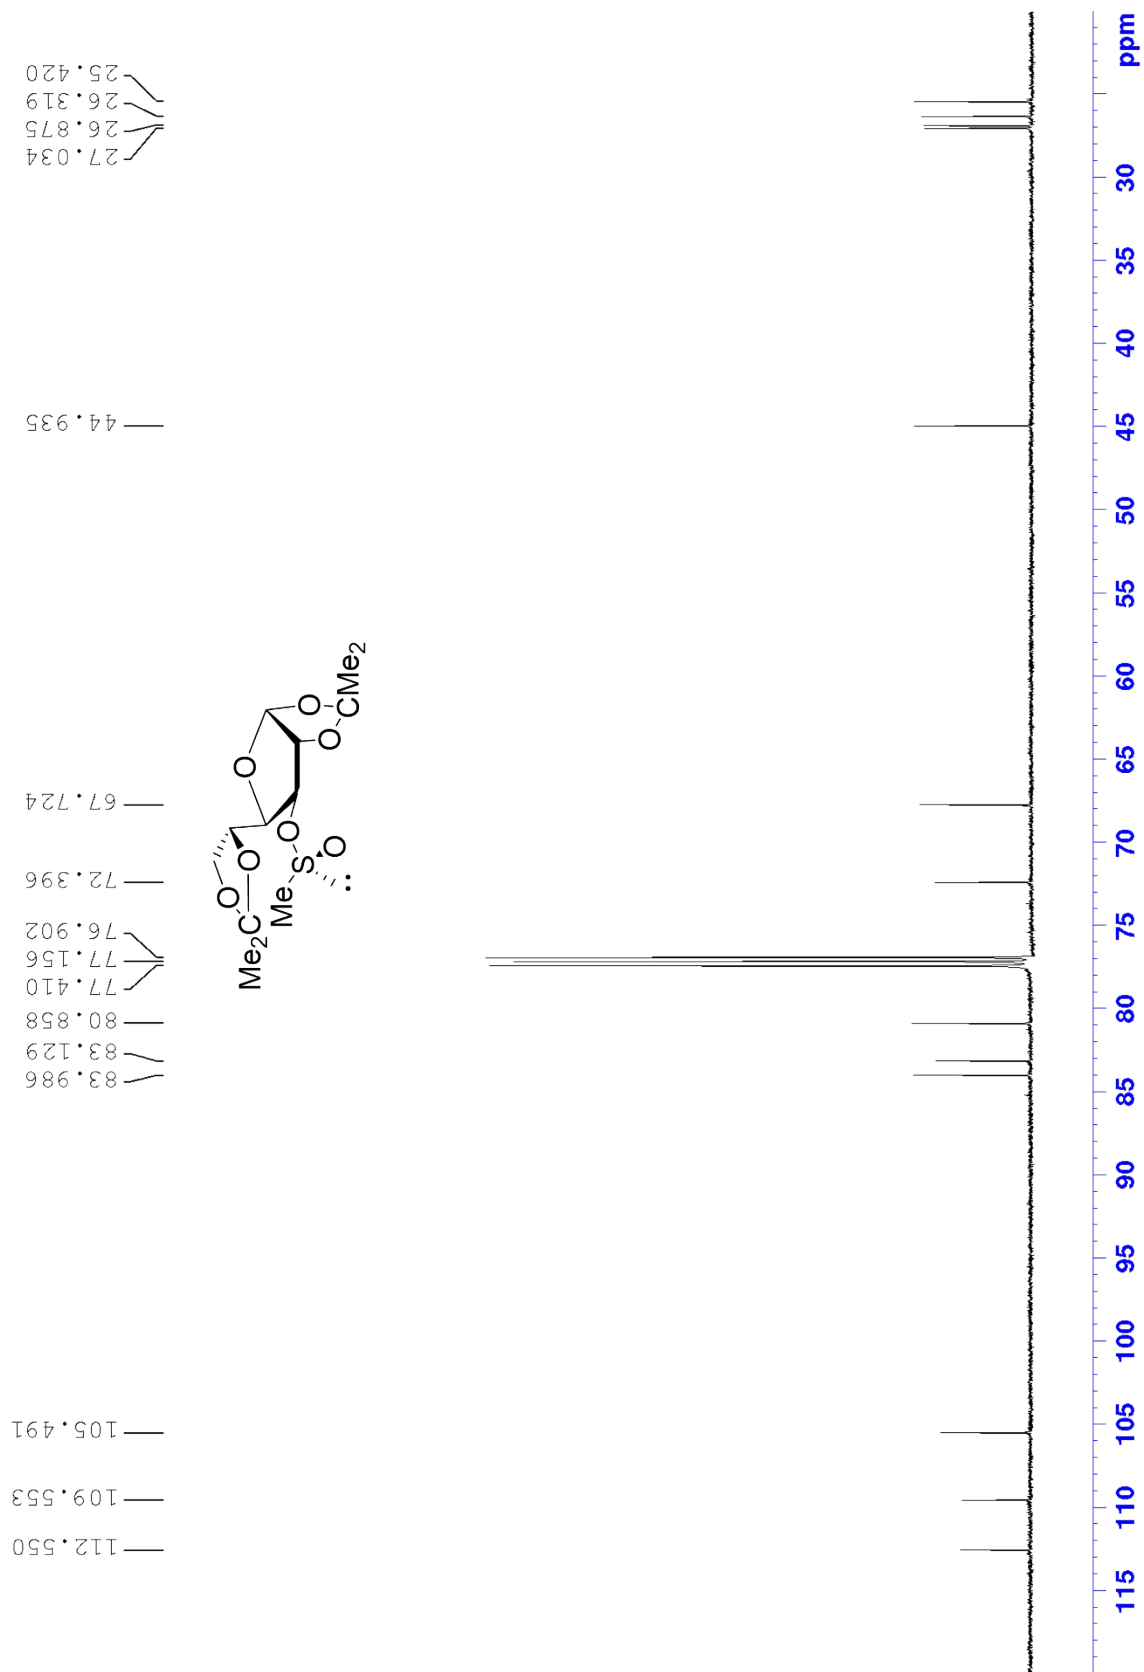

1,2:5,6-Di-O-isopropylidene- $\alpha$ -D-glucofuranosyl (-)-(S)-Methanesulfinat, **1(S)**

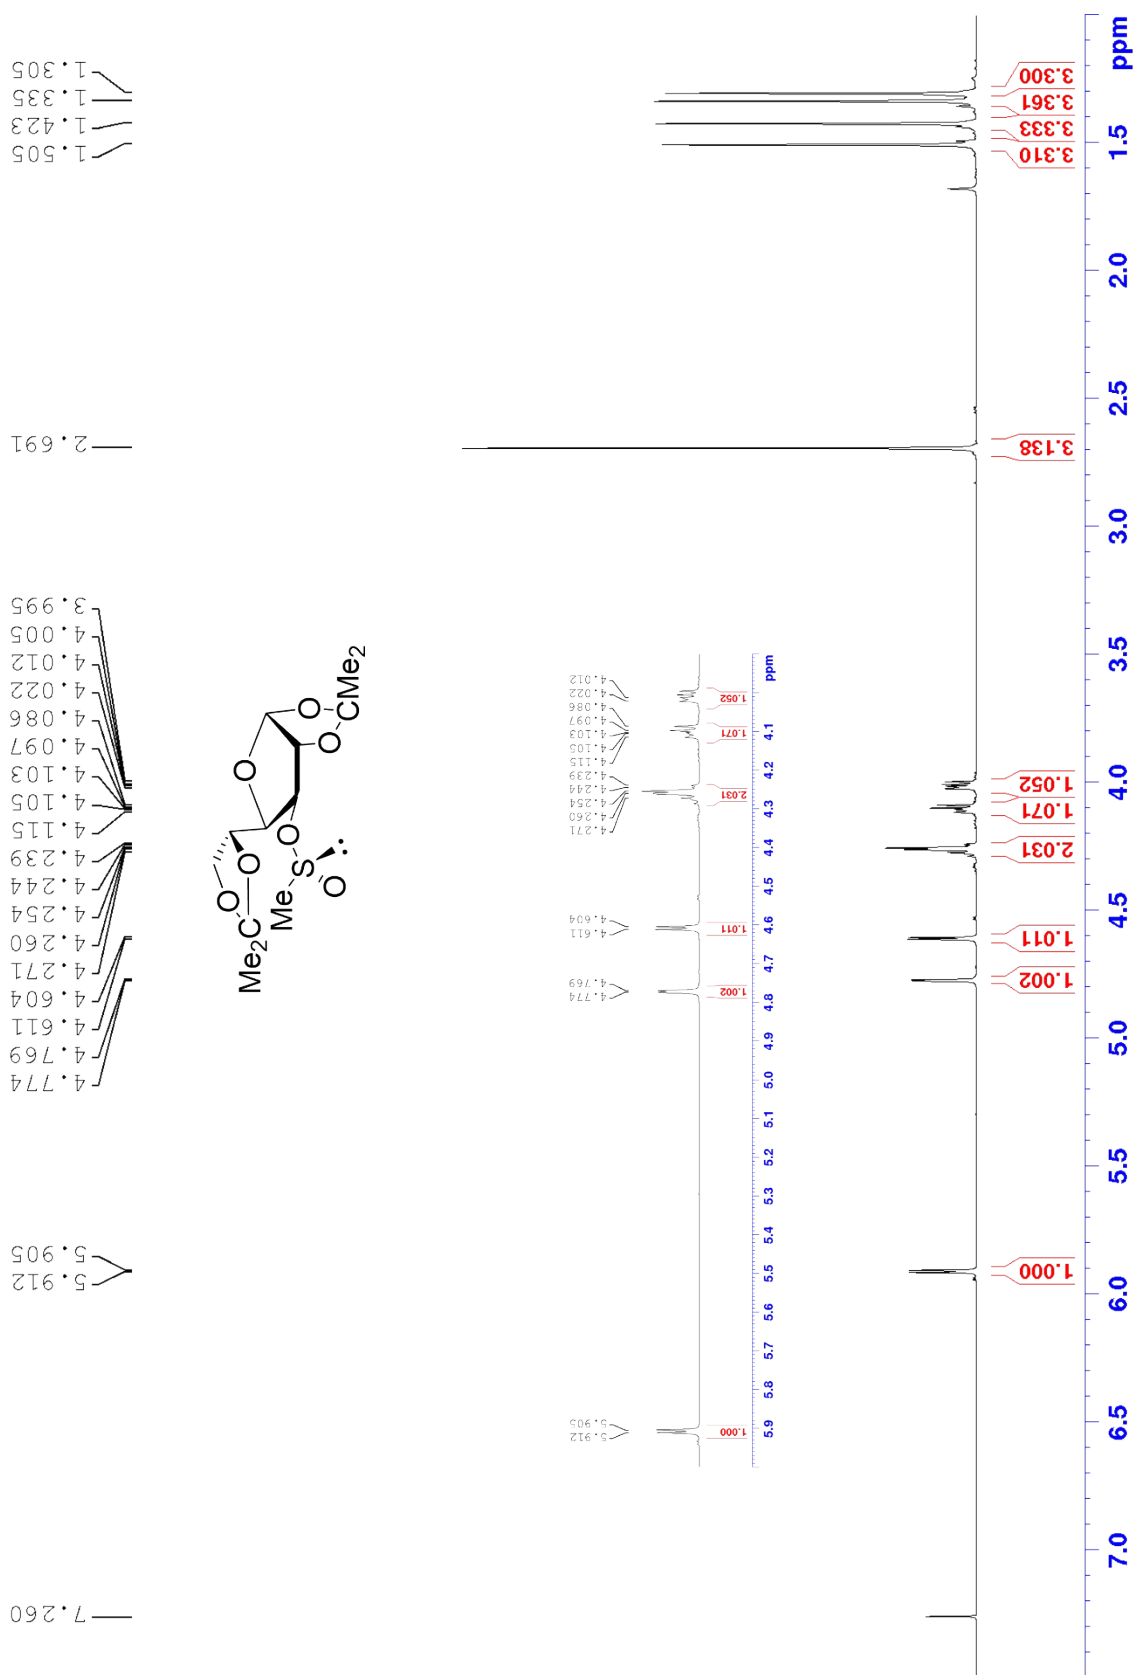

$^{13}\text{C}$ -NMR (500 MHz,  $\text{CDCl}_3$ )

26.925  
26.836  
26.382  
25.345

44.436

66.994

72.445

76.903

77.157

77.411

78.354

80.407

83.931

105.171

109.386

112.567

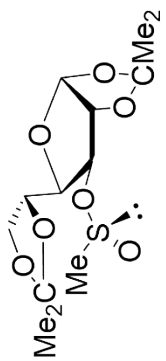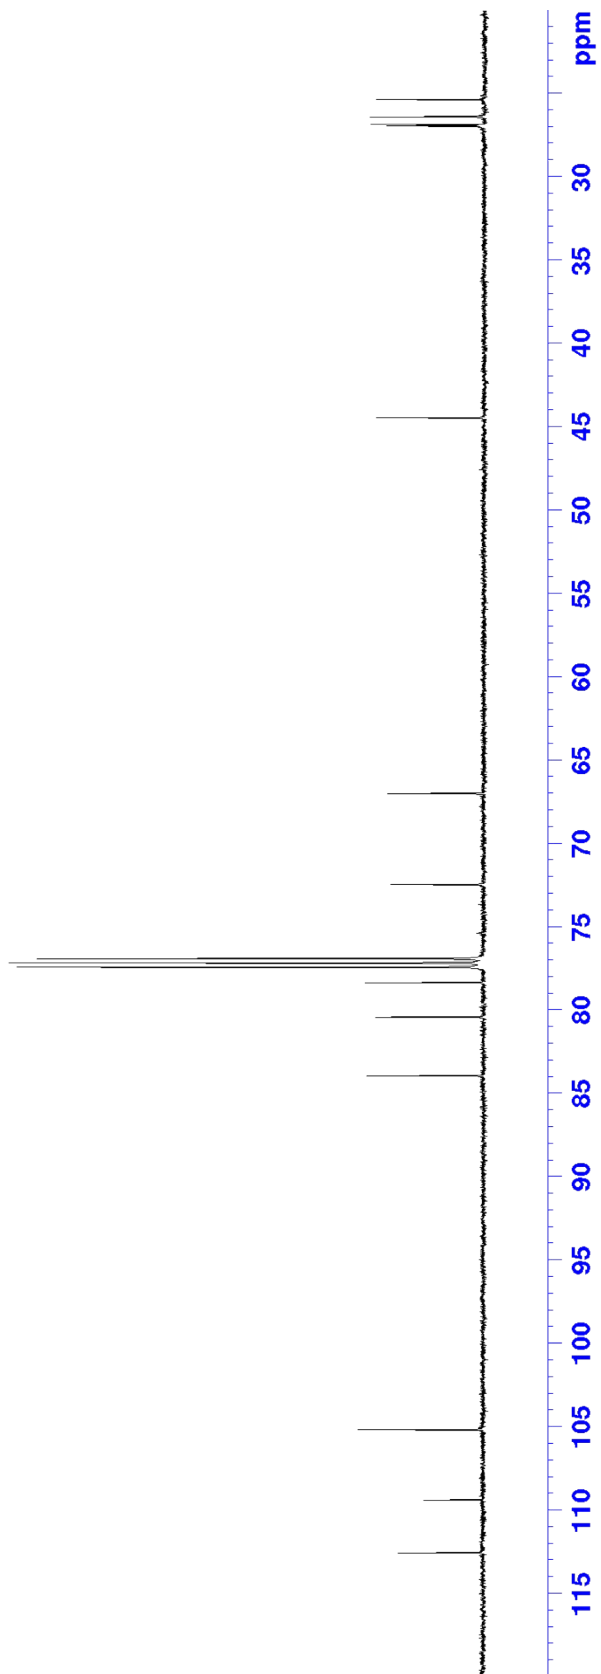

Methyl Phenyl sulfoxide, **2(S<sub>S</sub>)**

<sup>1</sup>H-NMR (500 MHz, CDCl<sub>3</sub>)

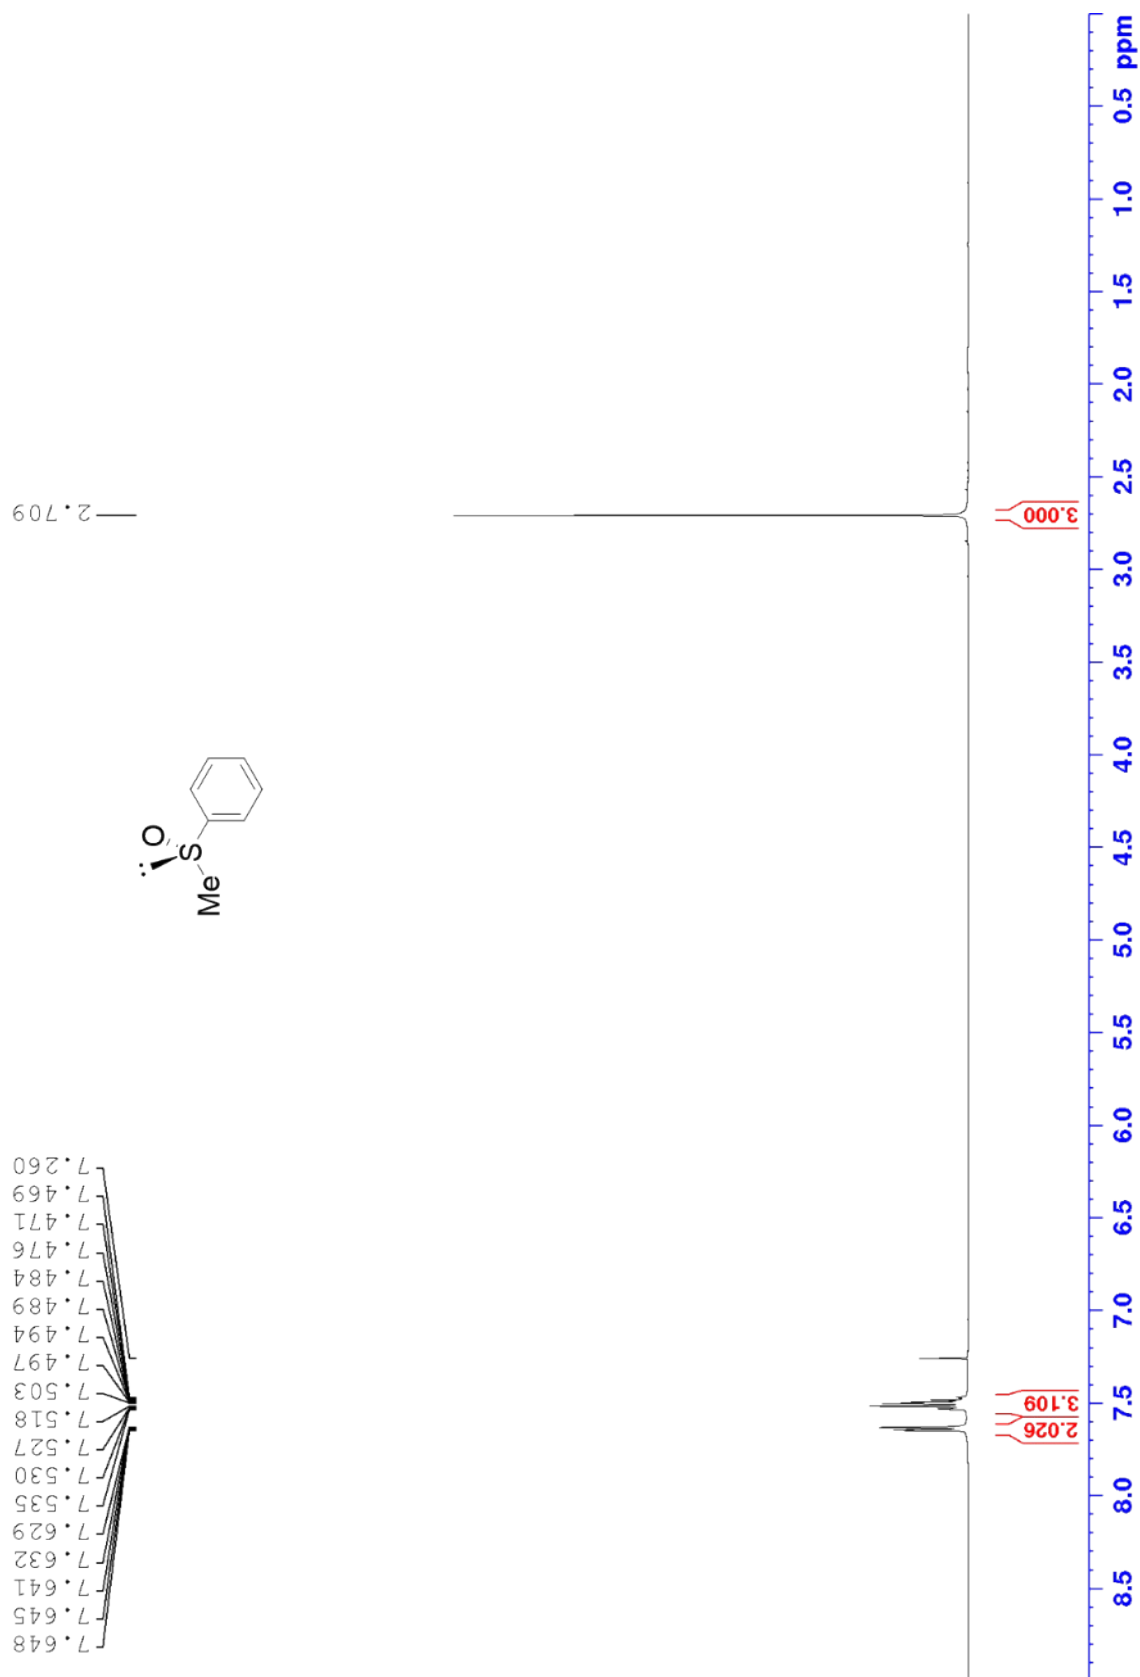



$^{13}\text{C}$ -NMR (500 MHz,  $\text{CDCl}_3$ )

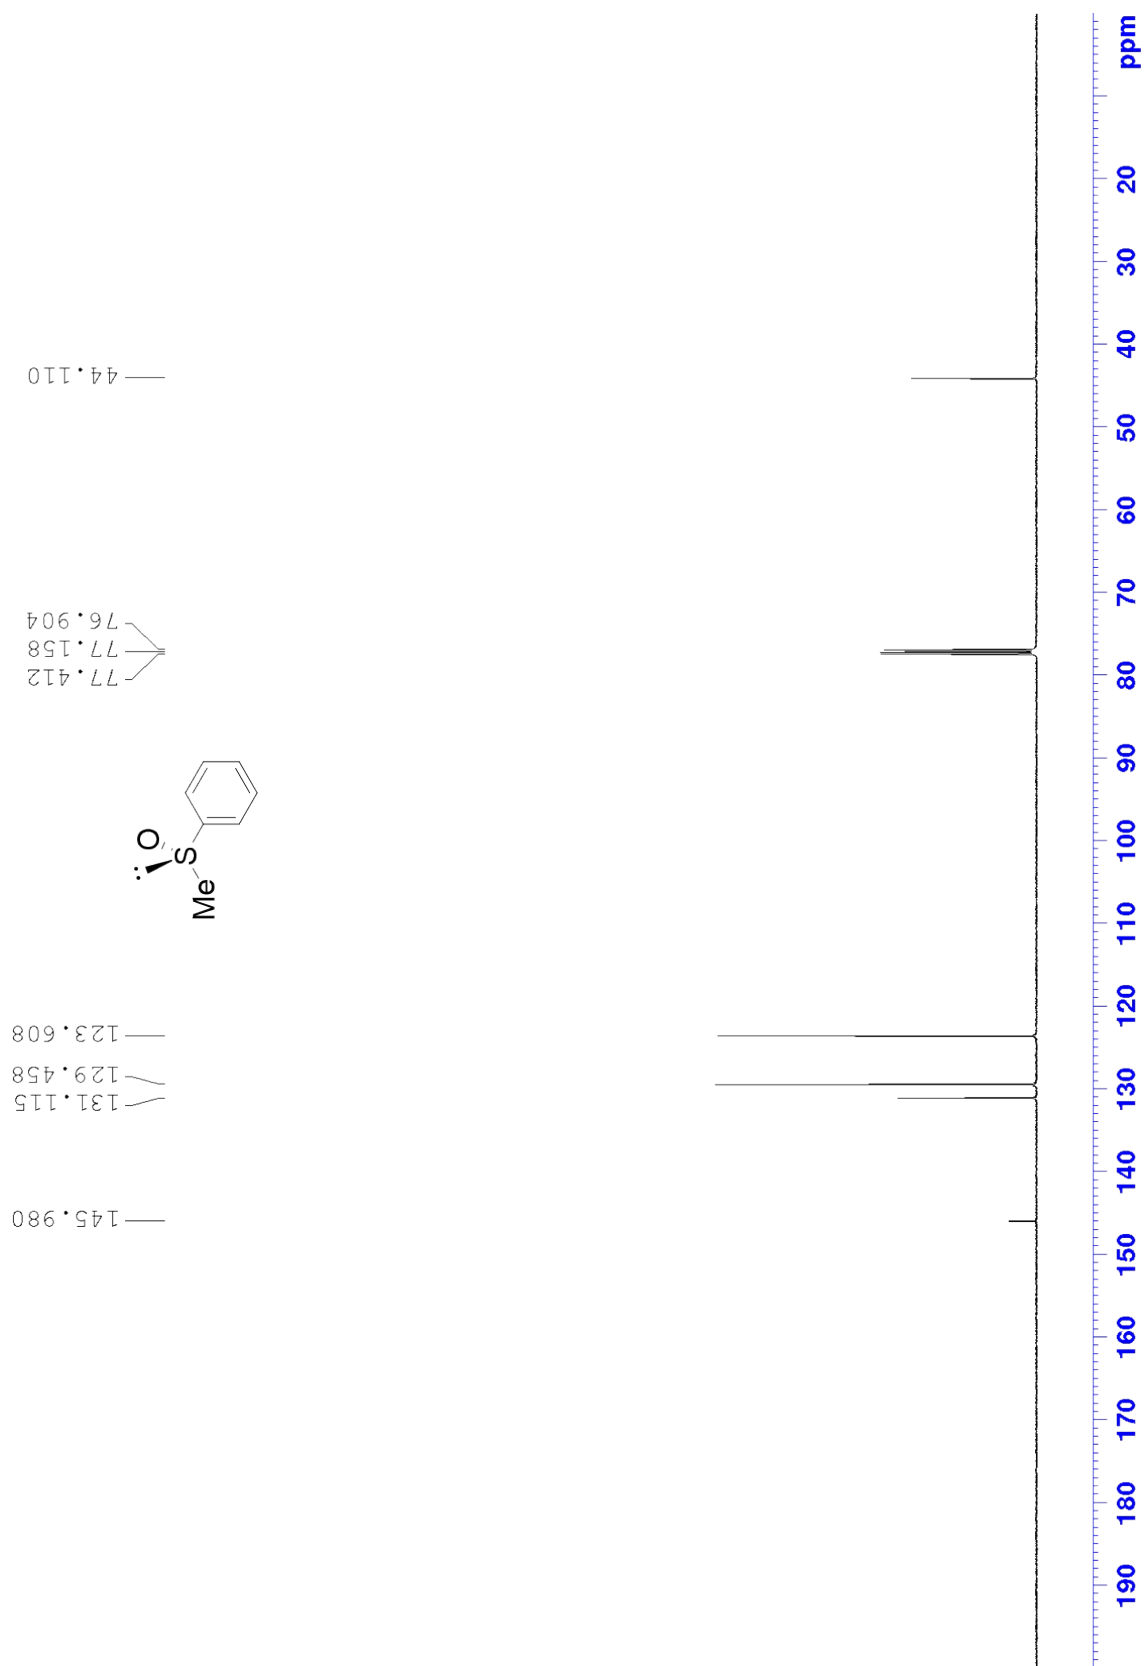

Methyl Phenyl sulfoxide, **2(R<sub>S</sub>)**

<sup>1</sup>H-NMR (500 MHz, CDCl<sub>3</sub>)

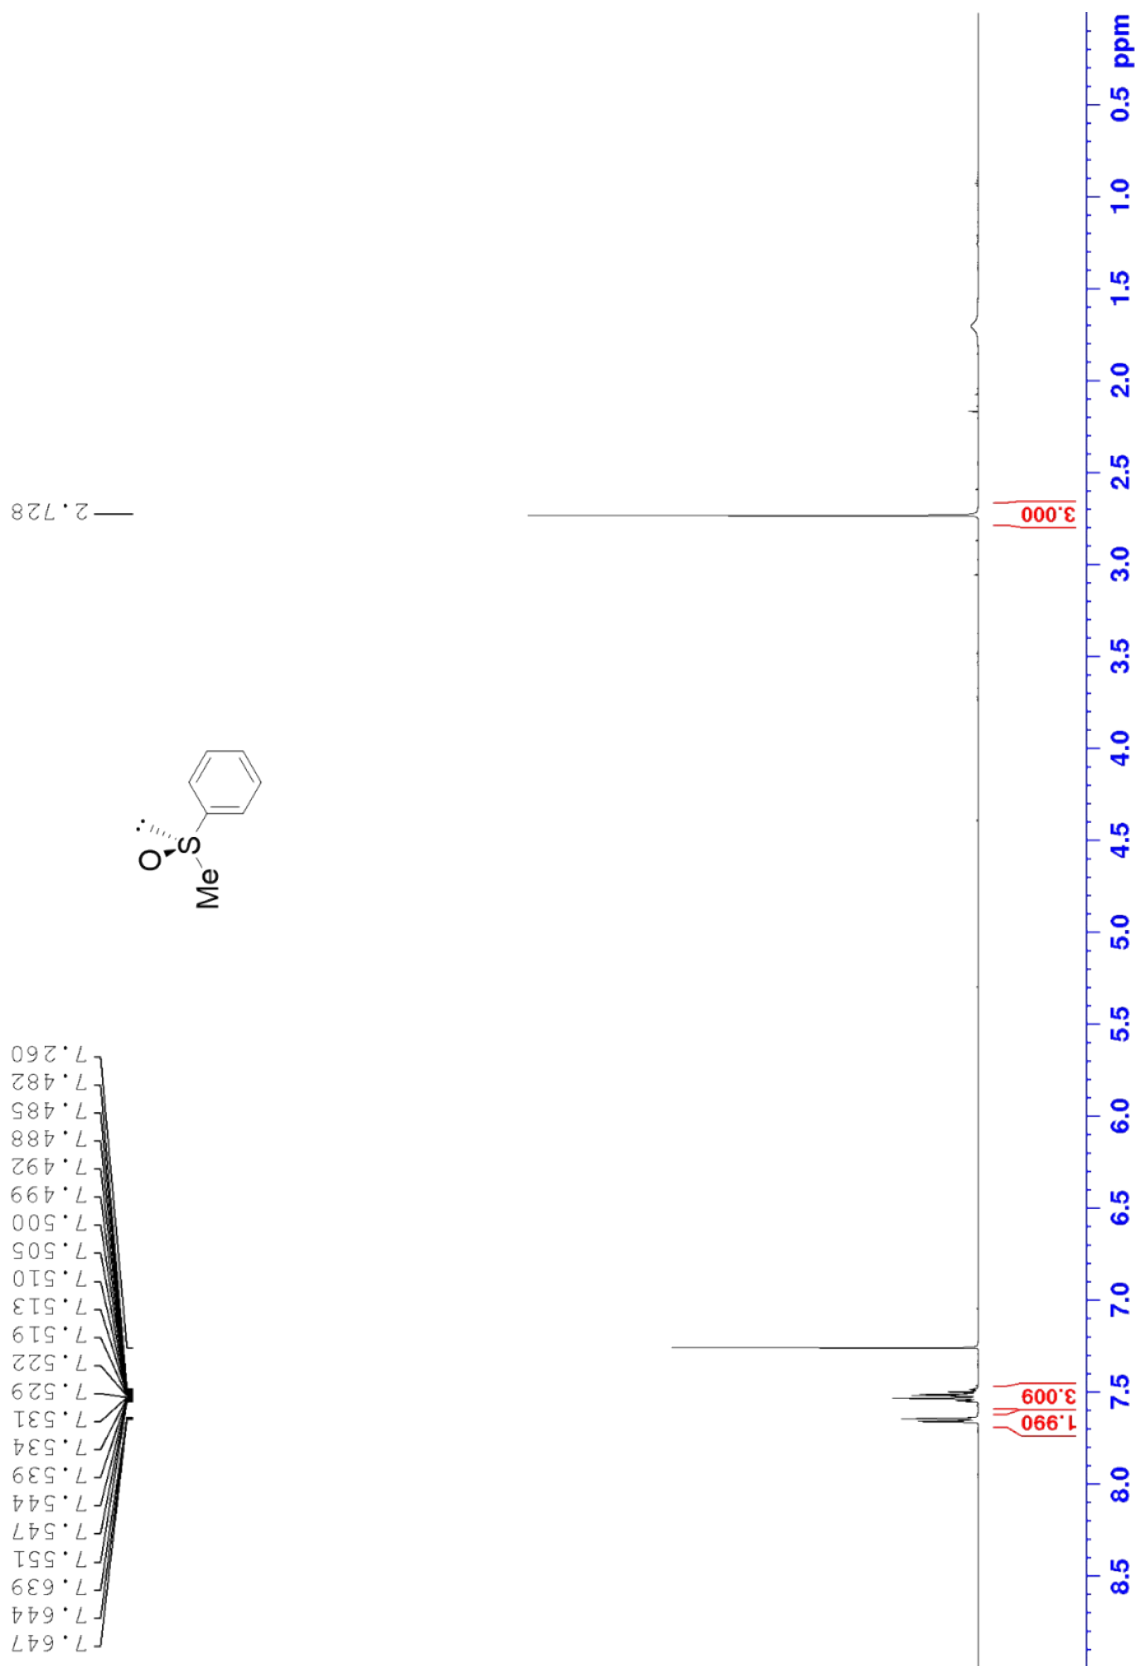

<sup>13</sup>C-NMR (500 MHz, CDCl<sub>3</sub>)

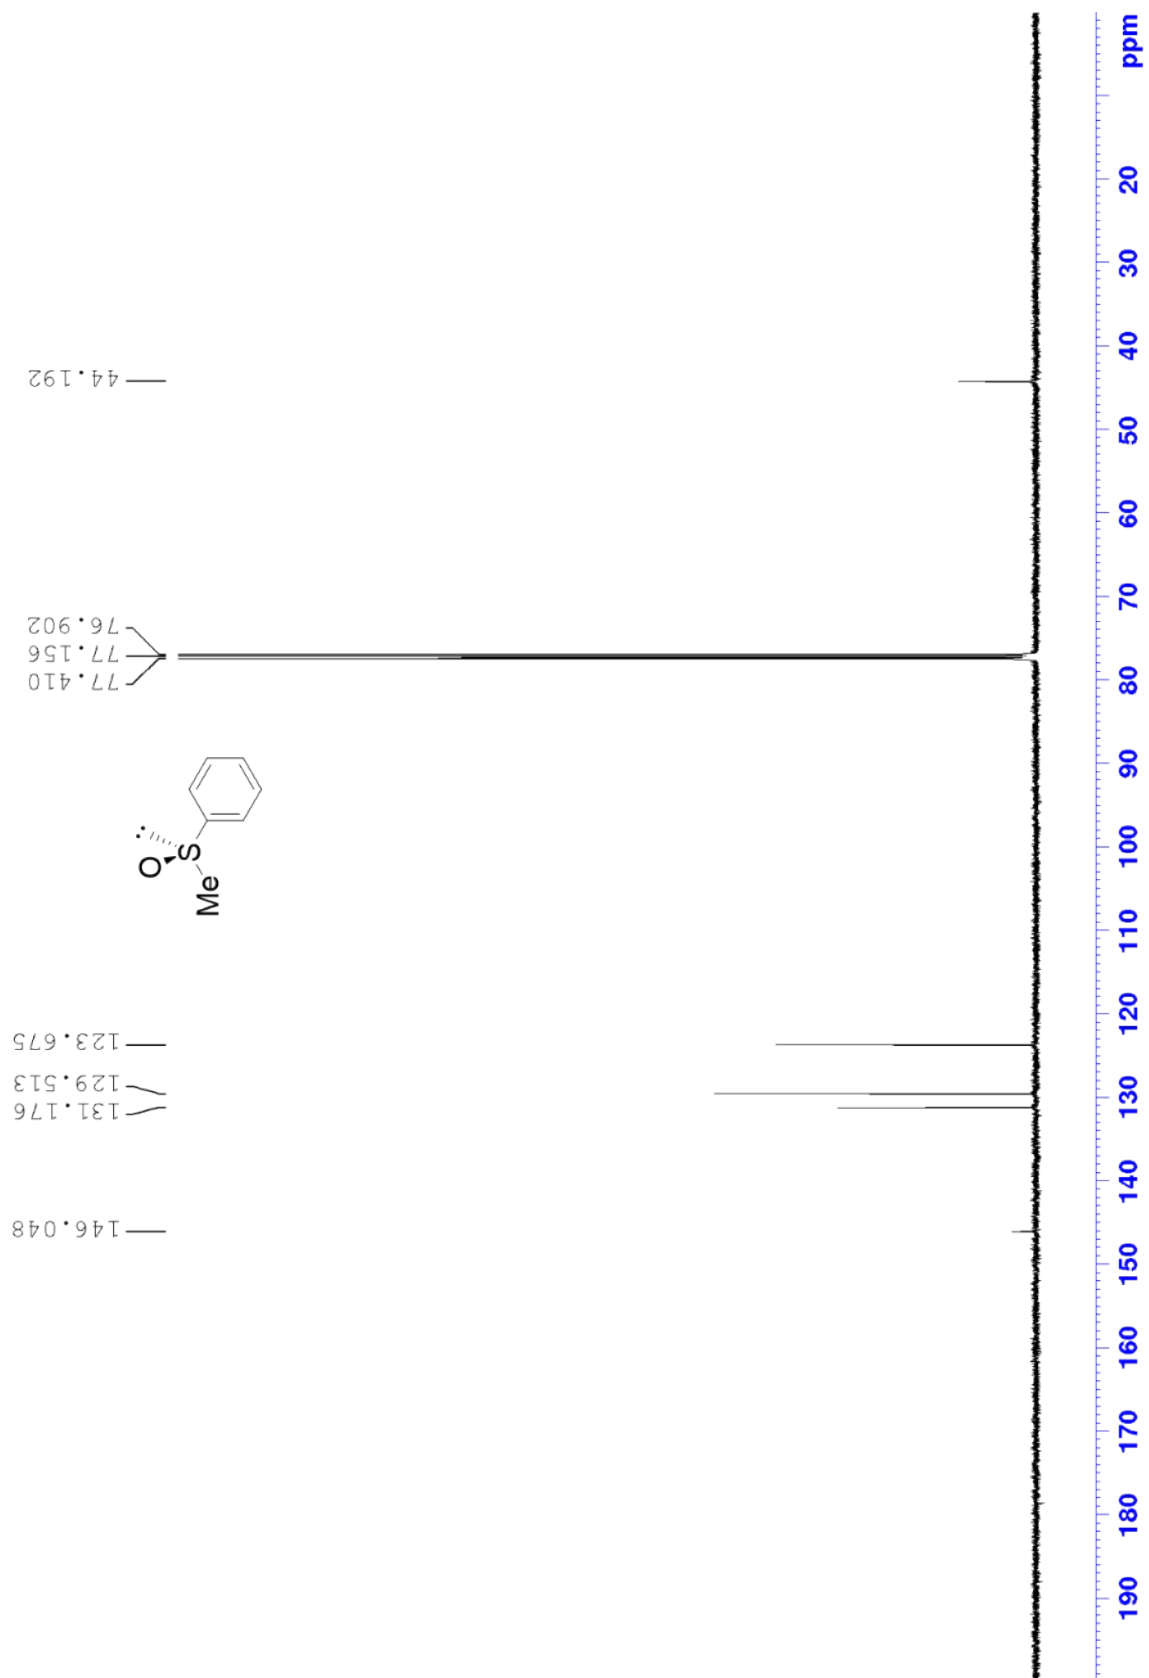

Methyl Tert-butyl sulfoxide, 3(S)

$^1\text{H-NMR}$  (500 MHz,  $\text{CDCl}_3$ )

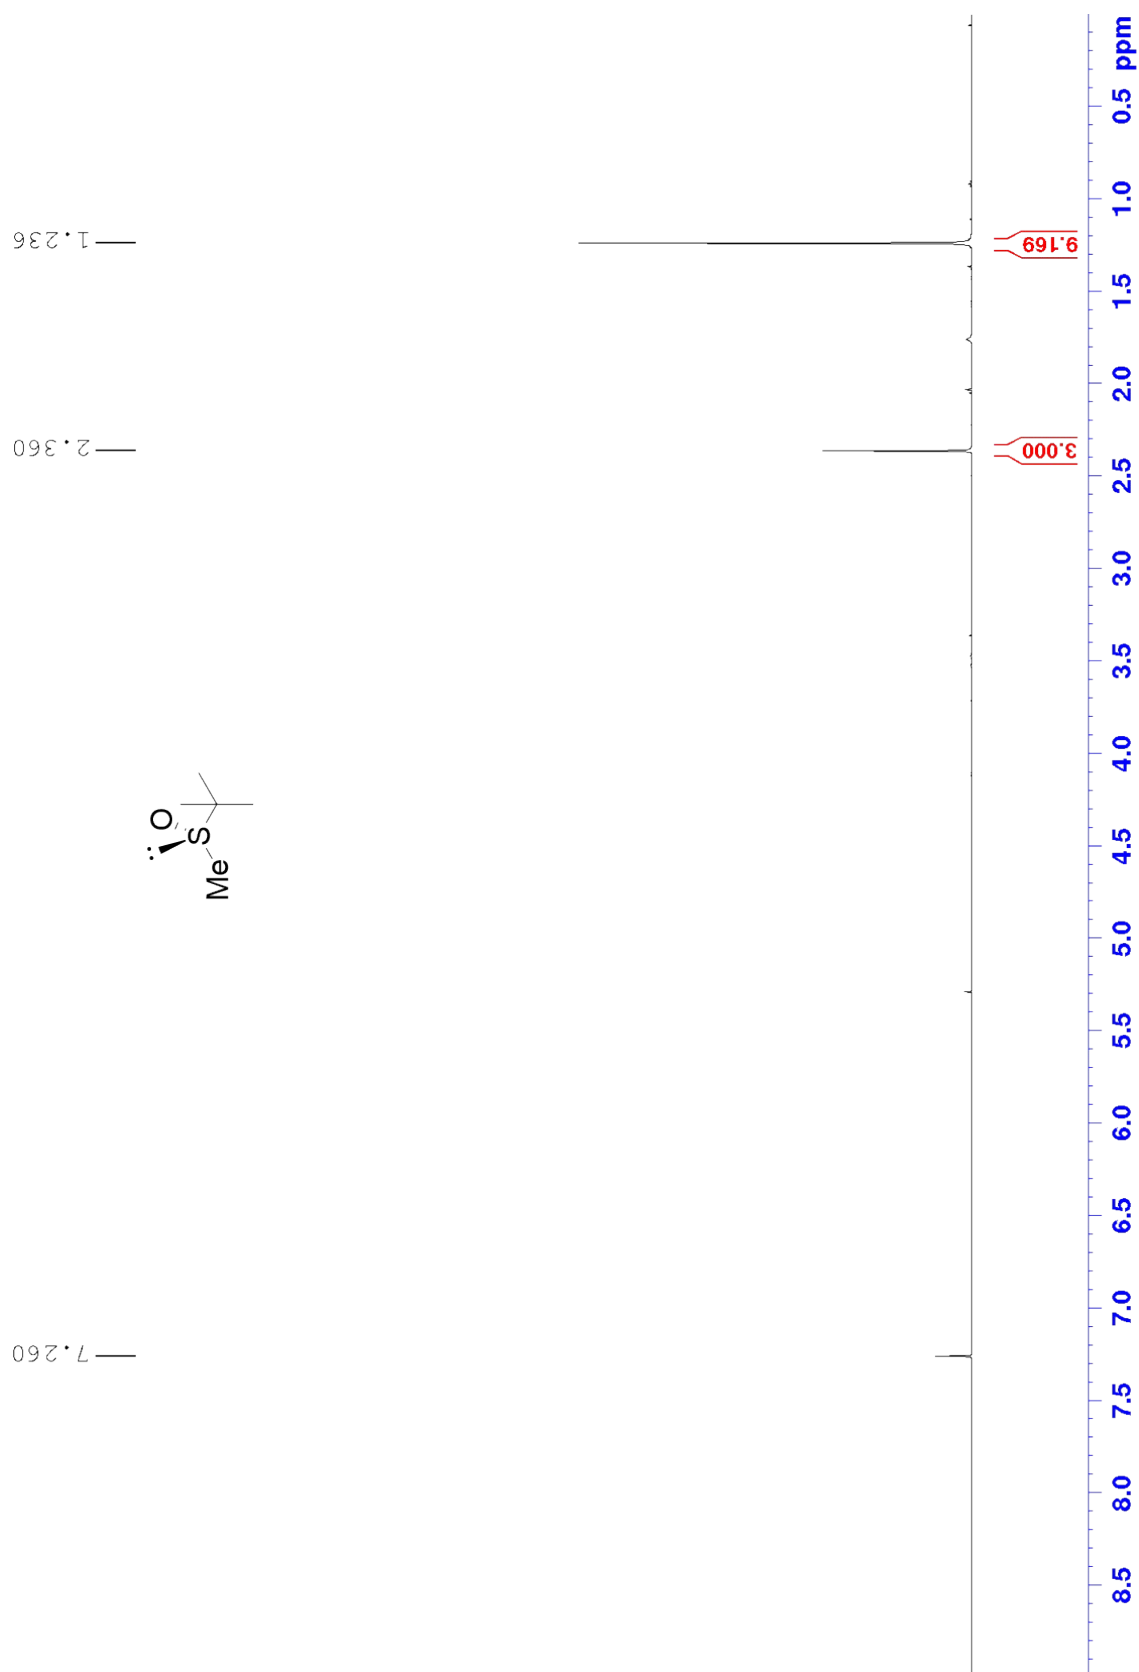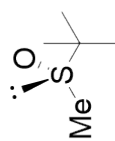

$^{13}\text{C-NMR}$  (500 MHz,  $\text{CDCl}_3$ )

7.260

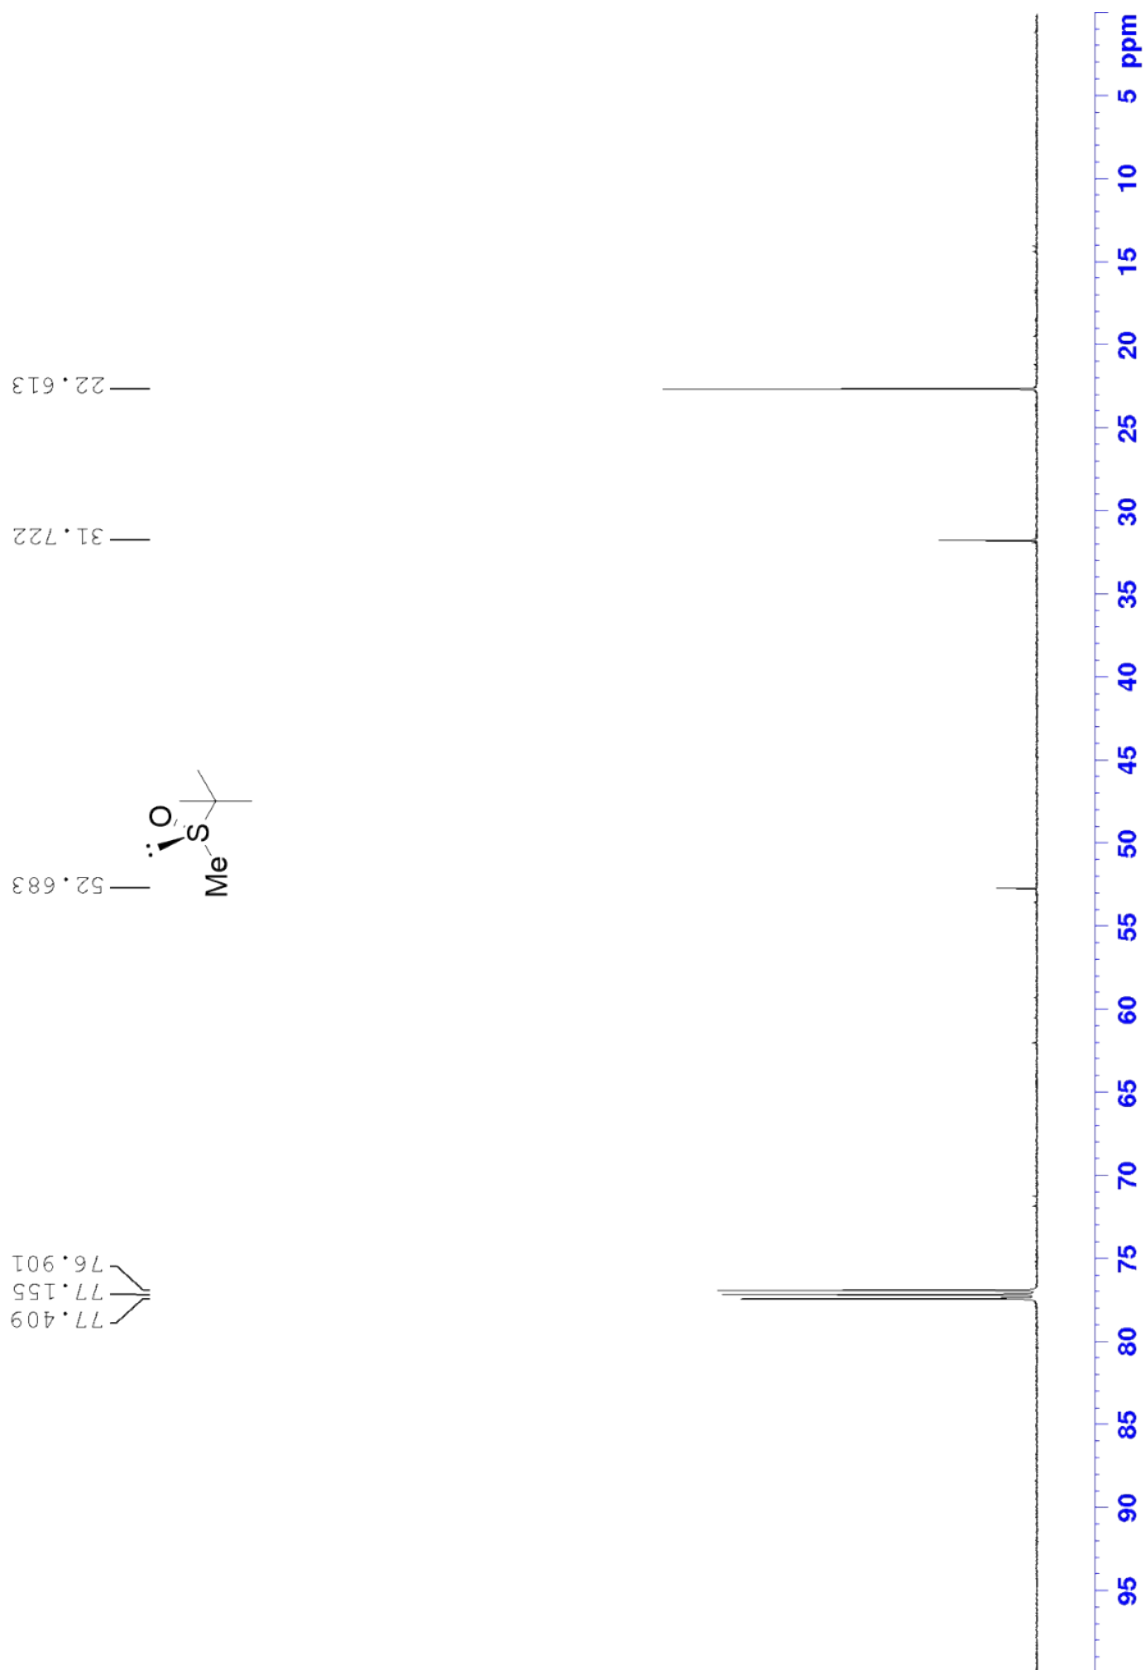

Methyl Tert-butyl sulfoxide, 3(R<sub>s</sub>)

$^1\text{H-NMR}$  (500 MHz,  $\text{CDCl}_3$ )

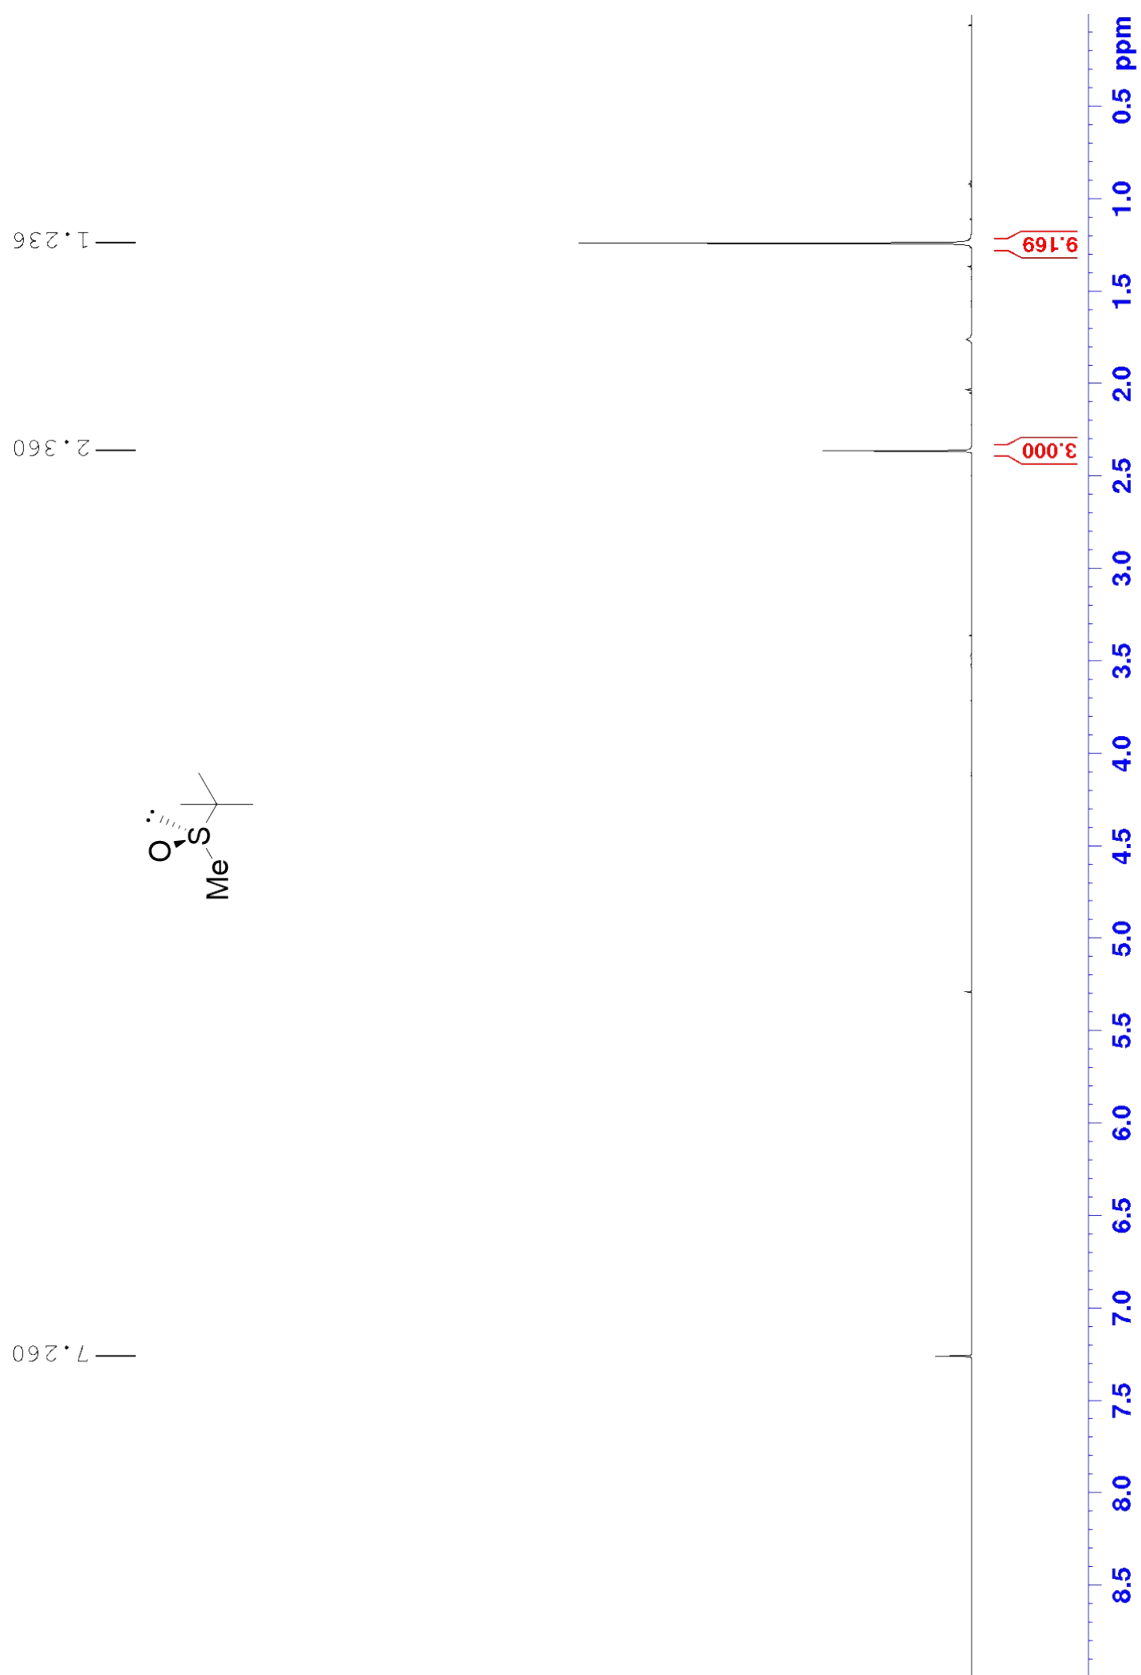

$^{13}\text{C-NMR}$  (500 MHz,  $\text{CDCl}_3$ )

7.260

2.360

1.236

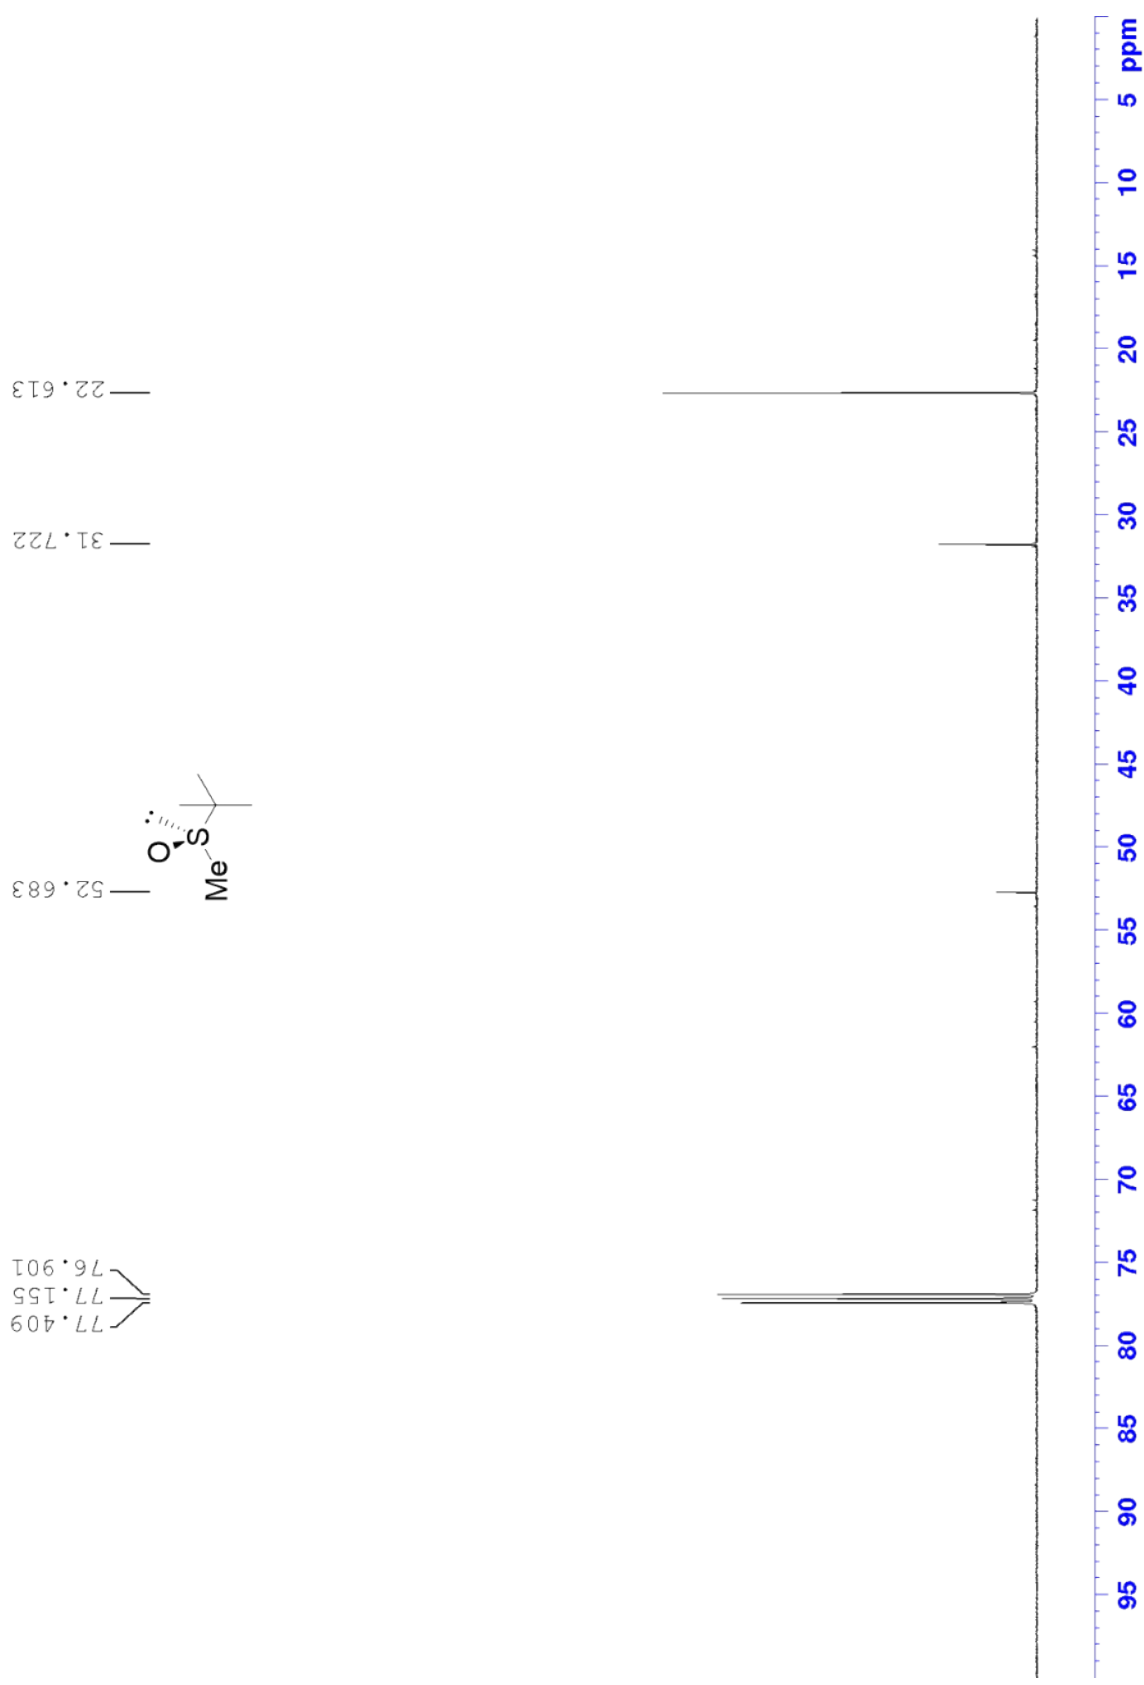

*(R<sub>s</sub>)-N-[(2-Naphthyl)methylidene]-2-methyl-2-propanesulfonamide, 4(R<sub>s</sub>)*

<sup>1</sup>H-NMR (500 MHz, CDCl<sub>3</sub>)

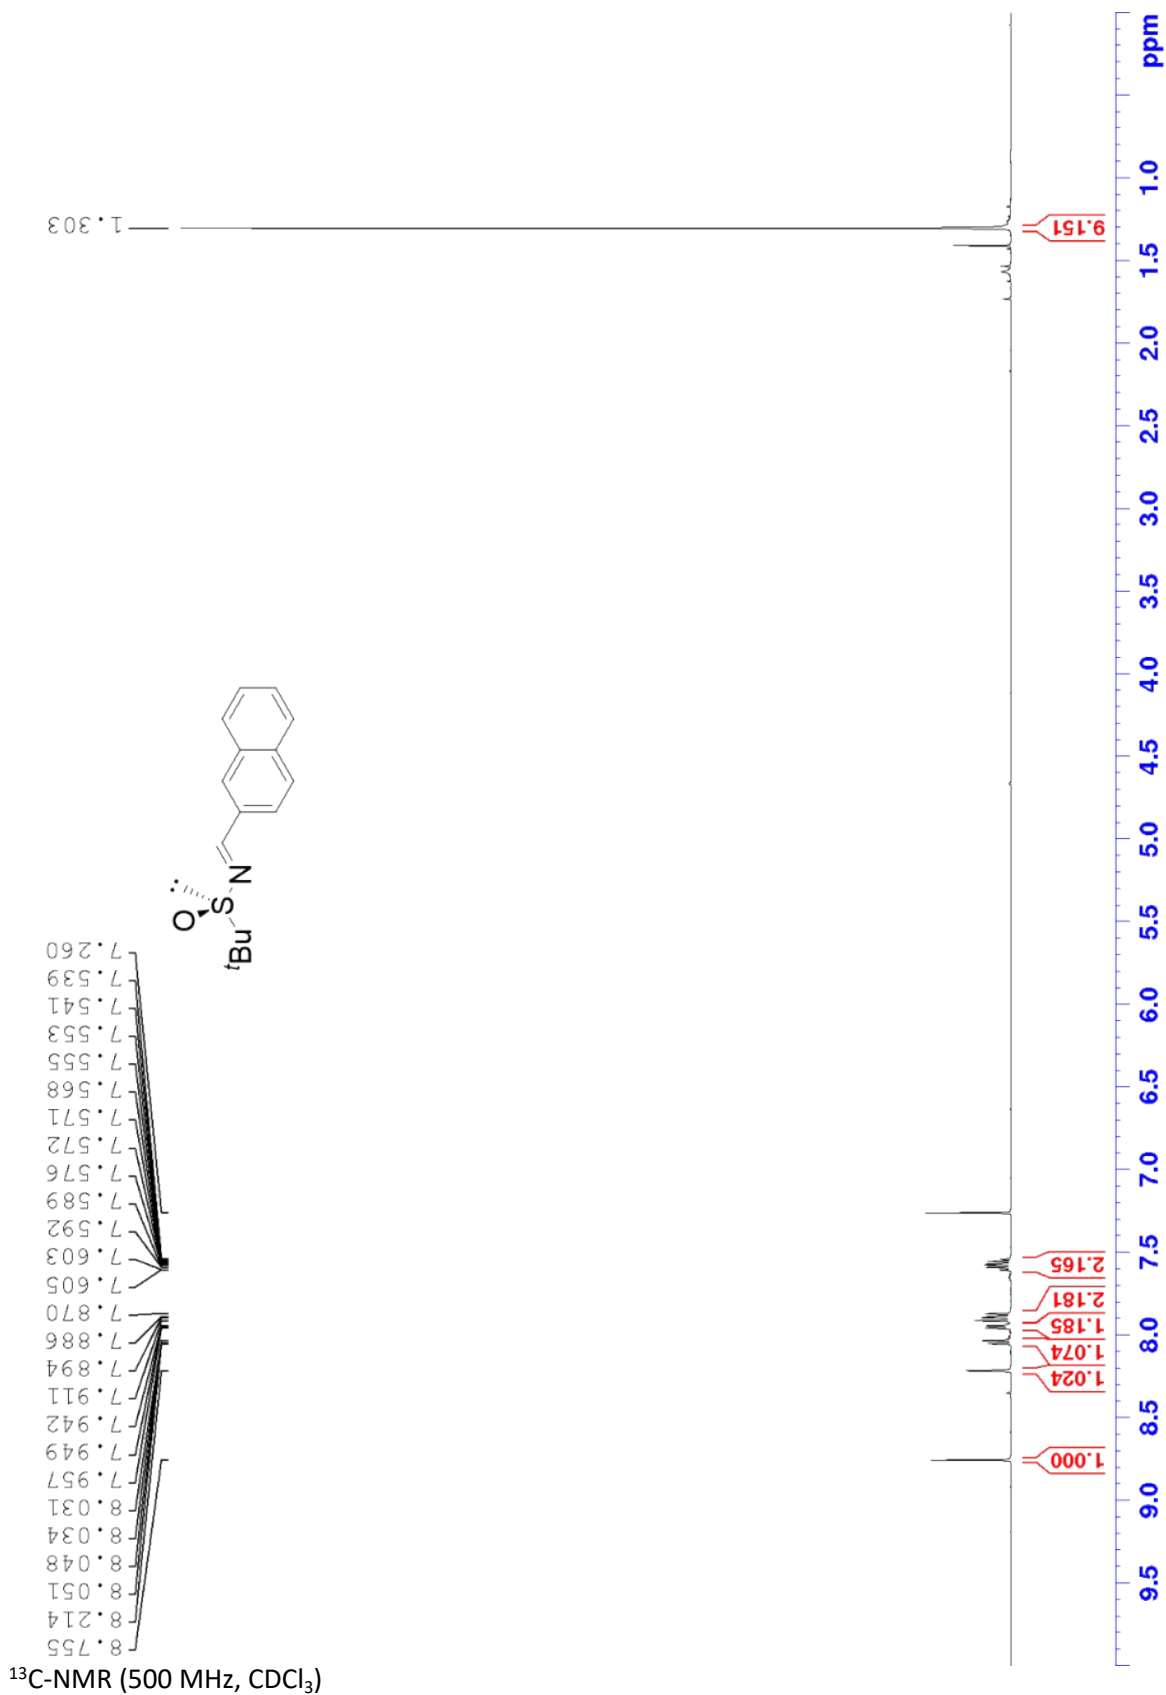



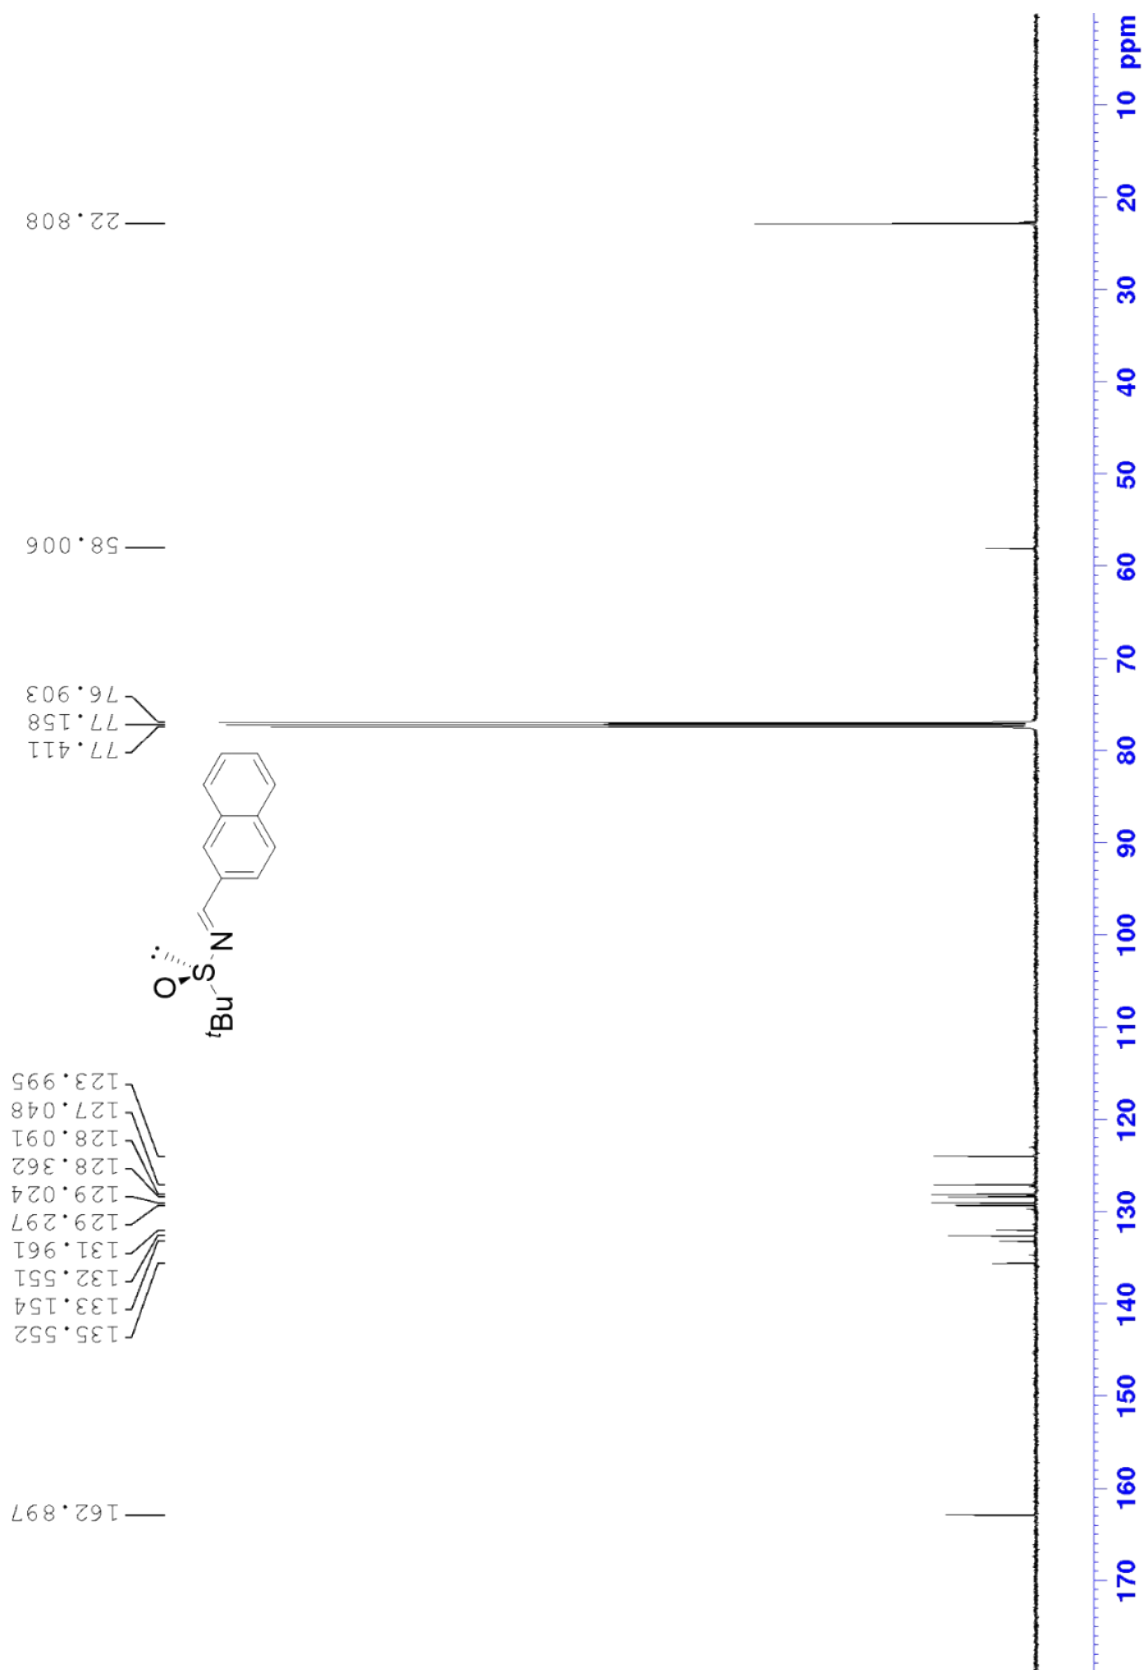

$(R_S)$ -N-Benzylidene-2-methyl-2-propanesulfinamide, **5**( $R_S$ )

$^1\text{H-NMR}$  (500 MHz,  $\text{CDCl}_3$ )

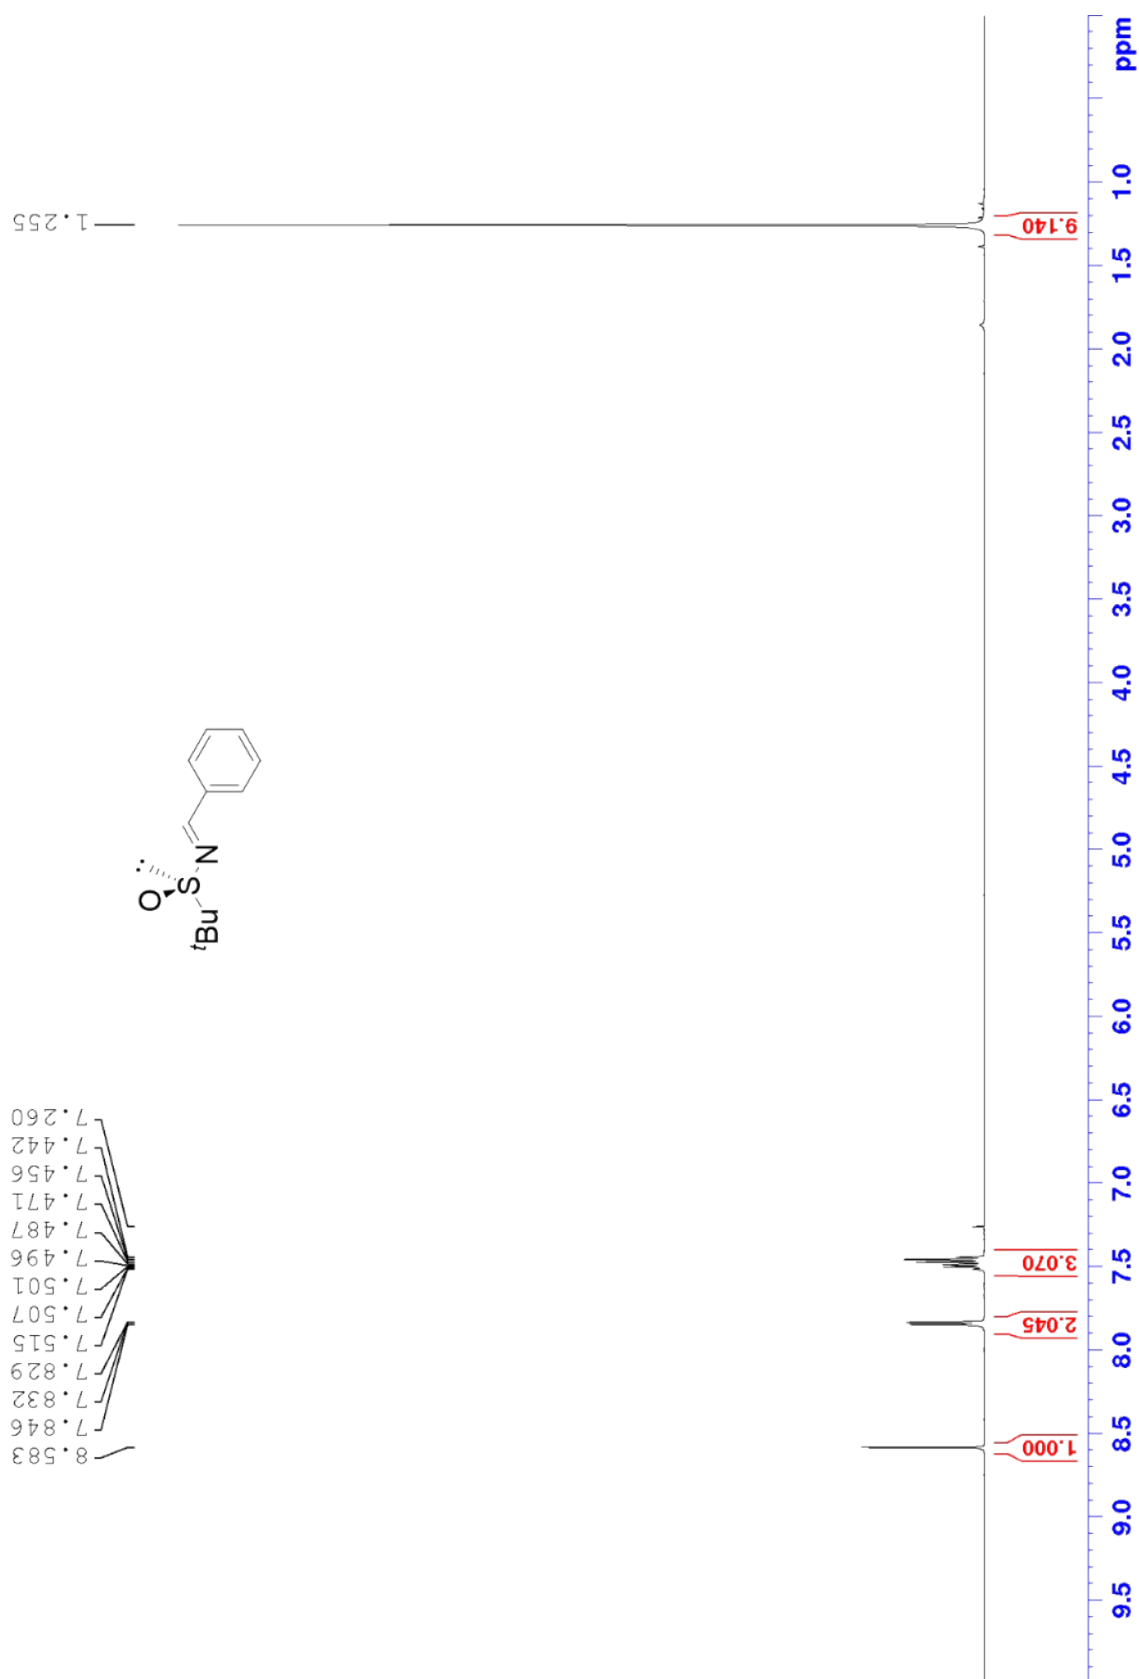

$^{13}\text{C-NMR}$  (500 MHz,  $\text{CDCl}_3$ )

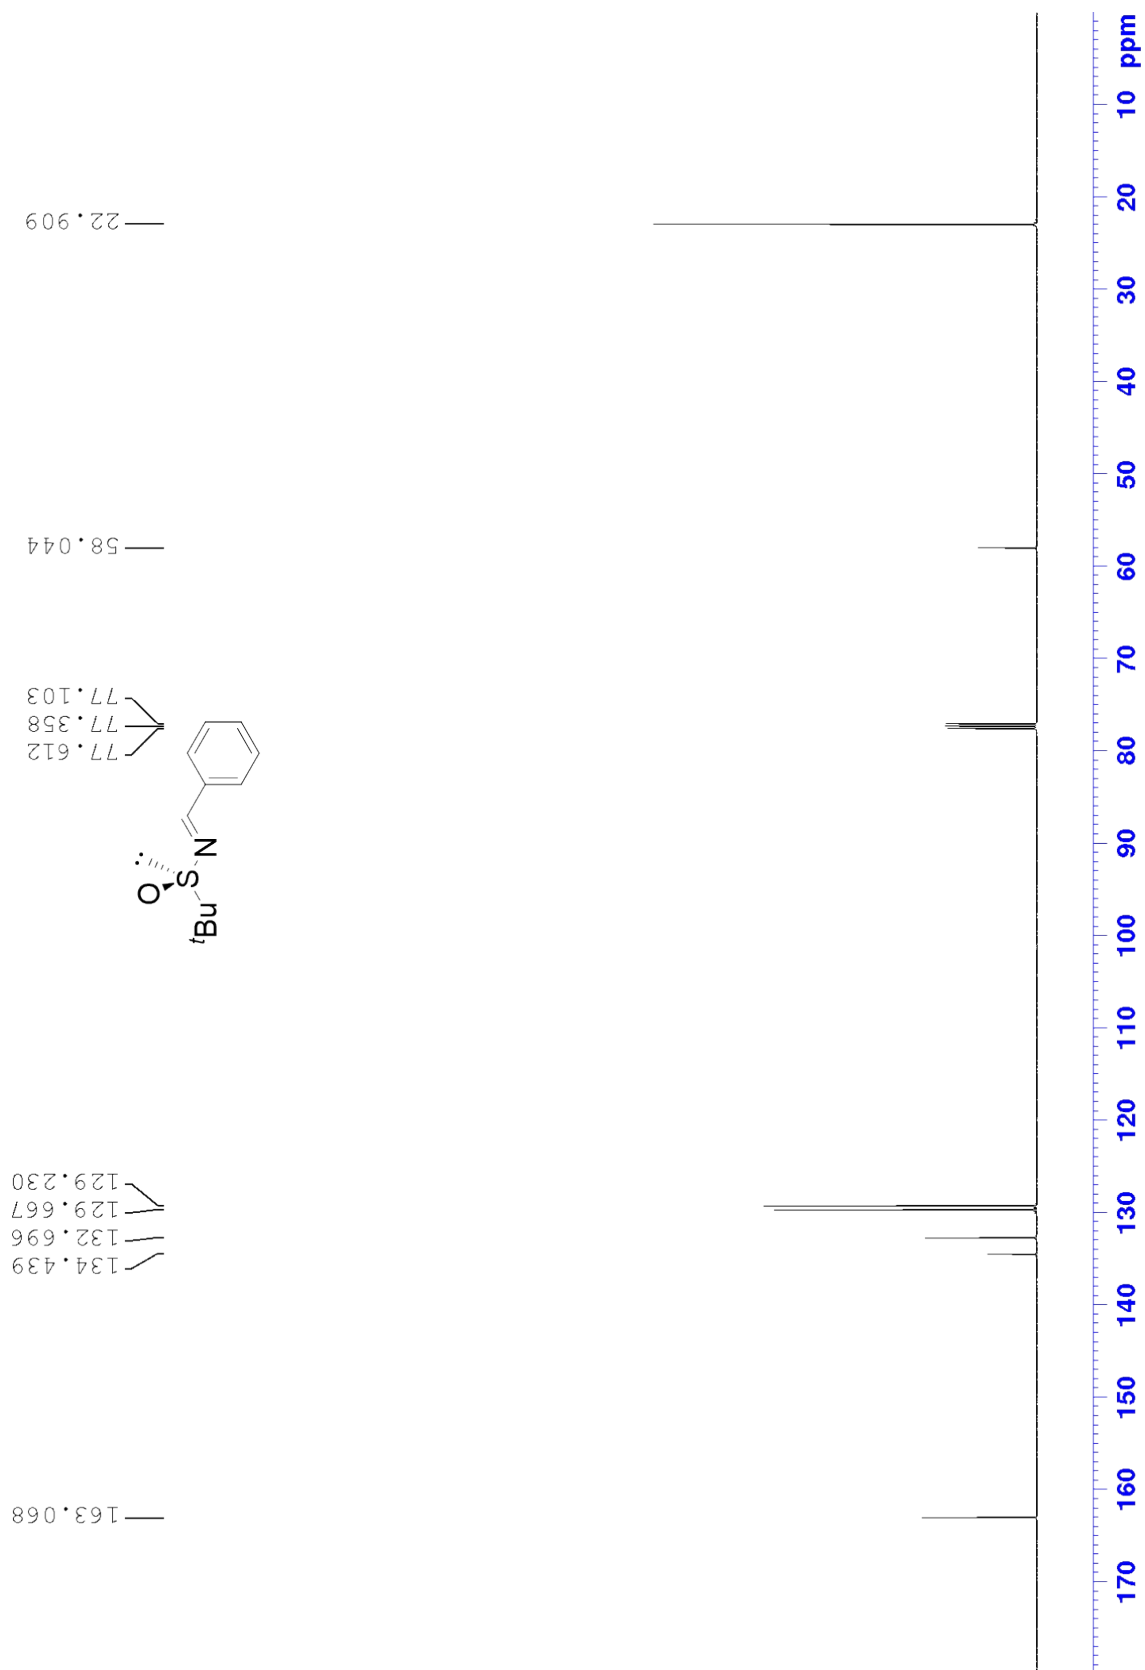

$(R_S)$ -N-(2-methyl-1-propylidene)-2-methyl-2-propanesulfinamide, **6**( $R_S$ )

$^1\text{H-NMR}$  (500 MHz,  $\text{CDCl}_3$ )

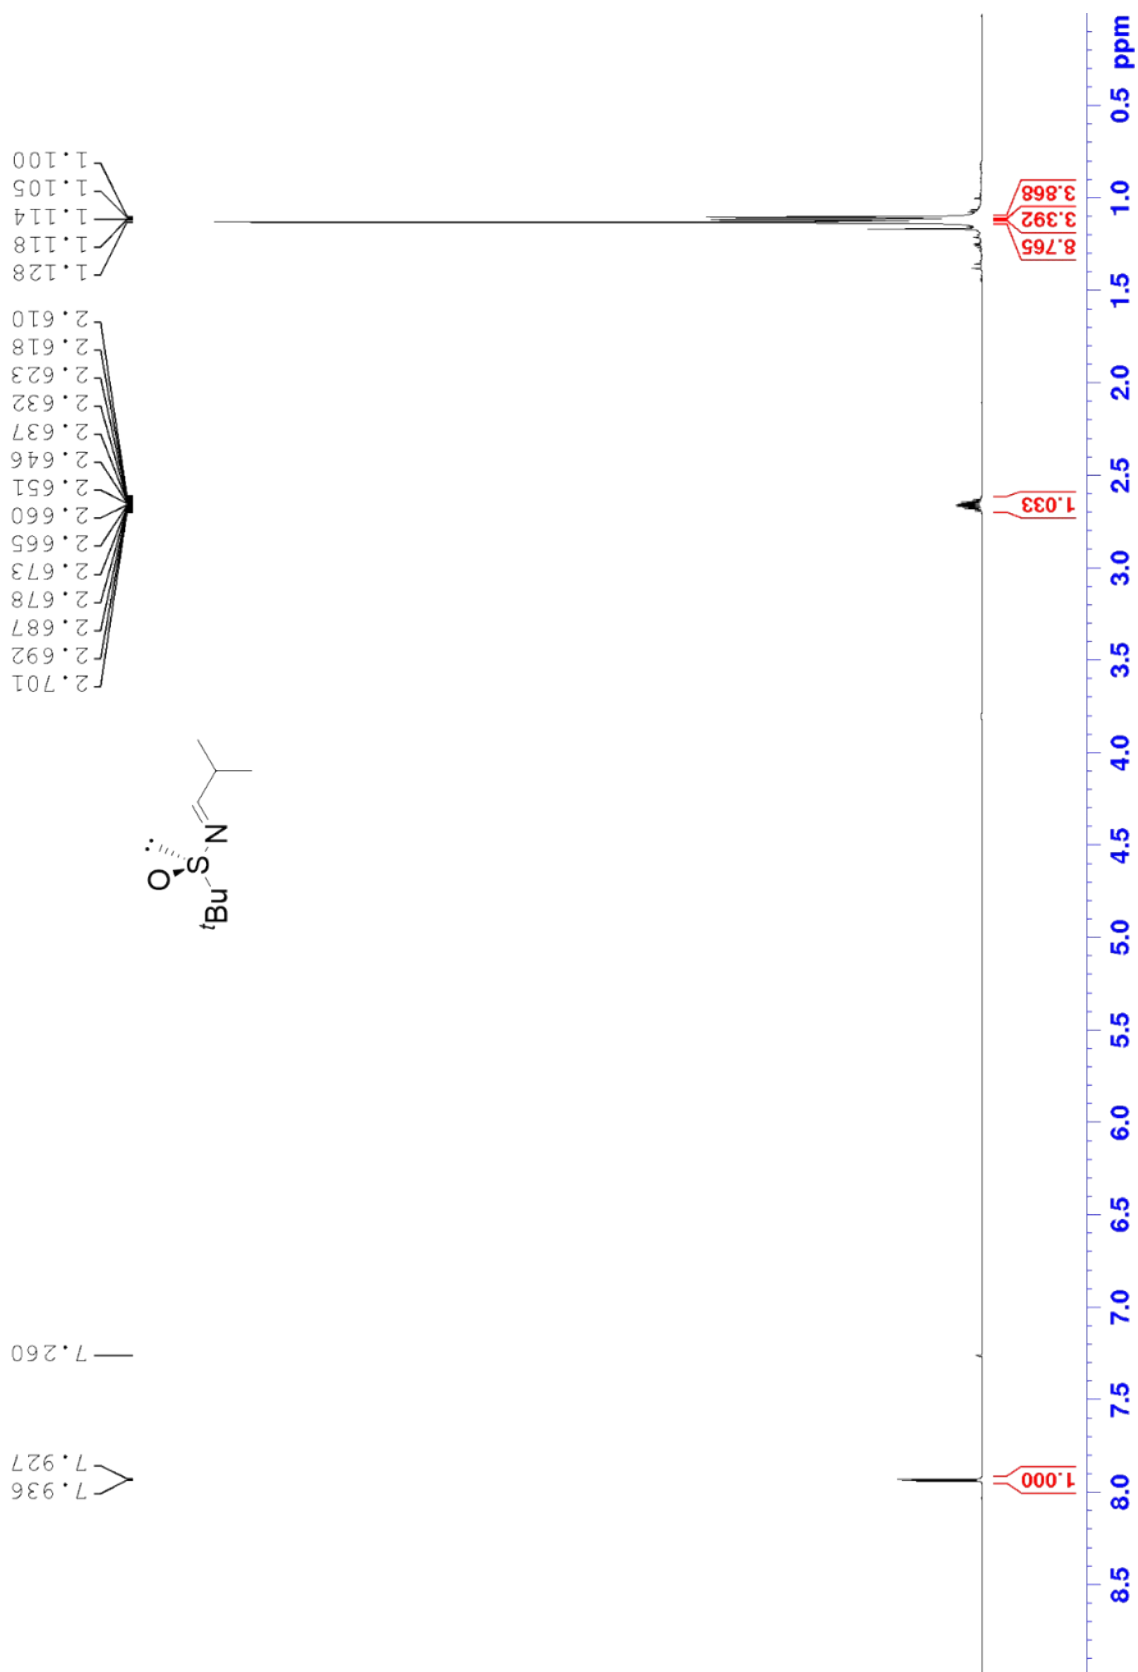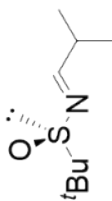

$^{13}\text{C-NMR}$  (500 MHz,  $\text{CDCl}_3$ )

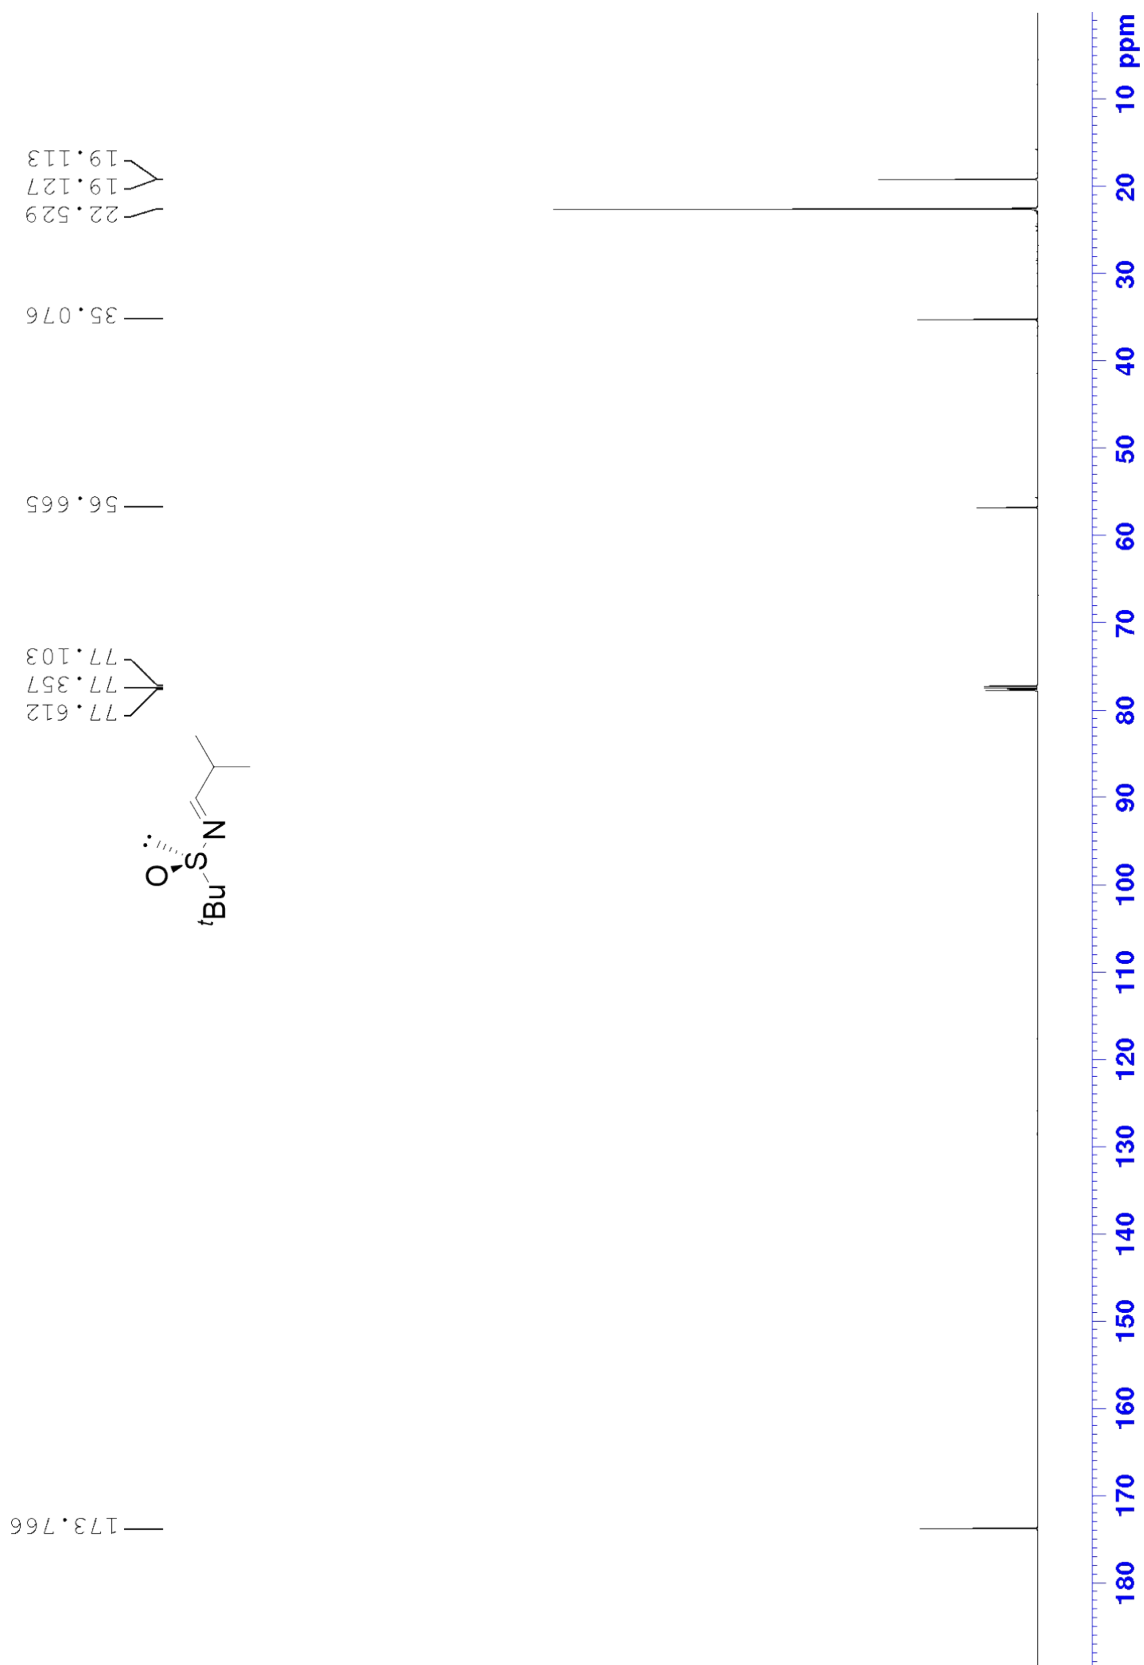

*(R<sub>S</sub>S<sub>C</sub>R<sub>S</sub>)-N-[1-(2-Naphthyl)-2-(phenylsulfinyl)ethyl]-2-methyl-2-propanesulfonamide, 7(R<sub>S</sub>S<sub>C</sub>R<sub>S</sub>)*

$^1\text{H-NMR}$  (500 MHz,  $\text{CD}_3\text{CN}$ )

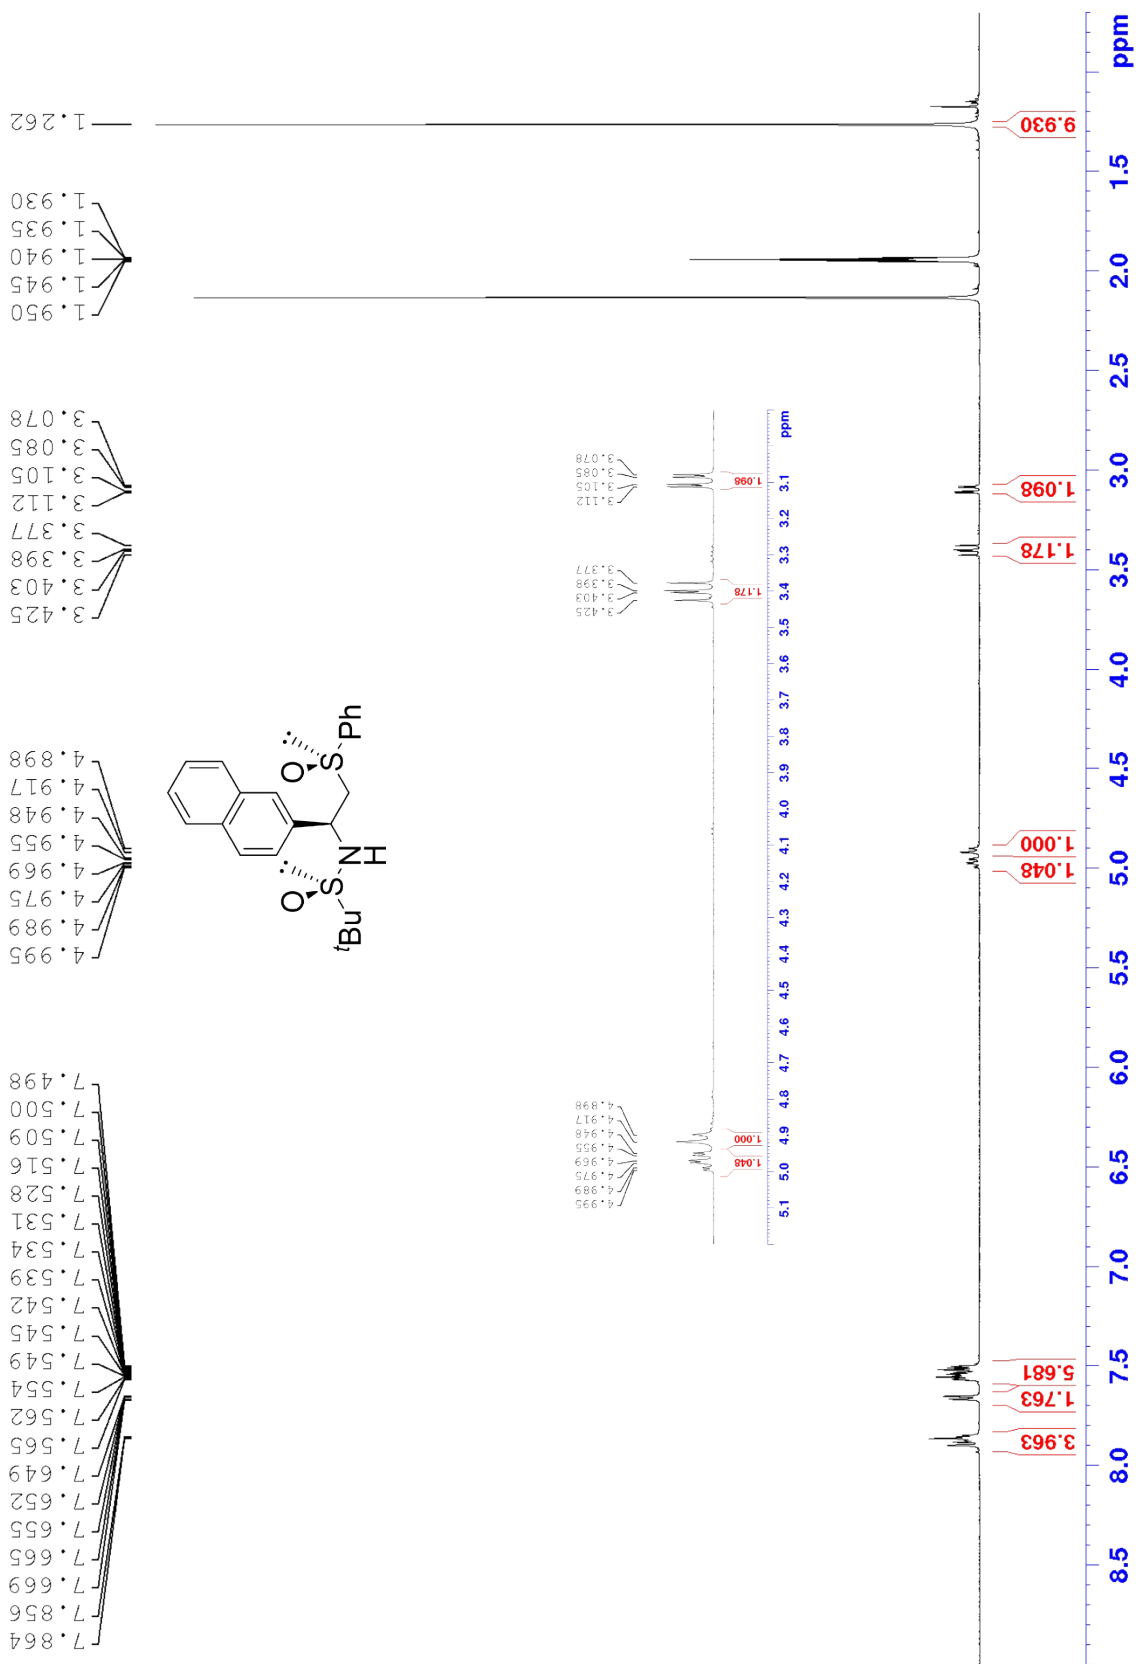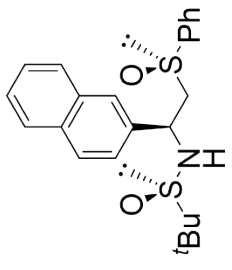

$^{13}\text{C-NMR}$  (500 MHz,  $\text{CD}_3\text{CN}$ )

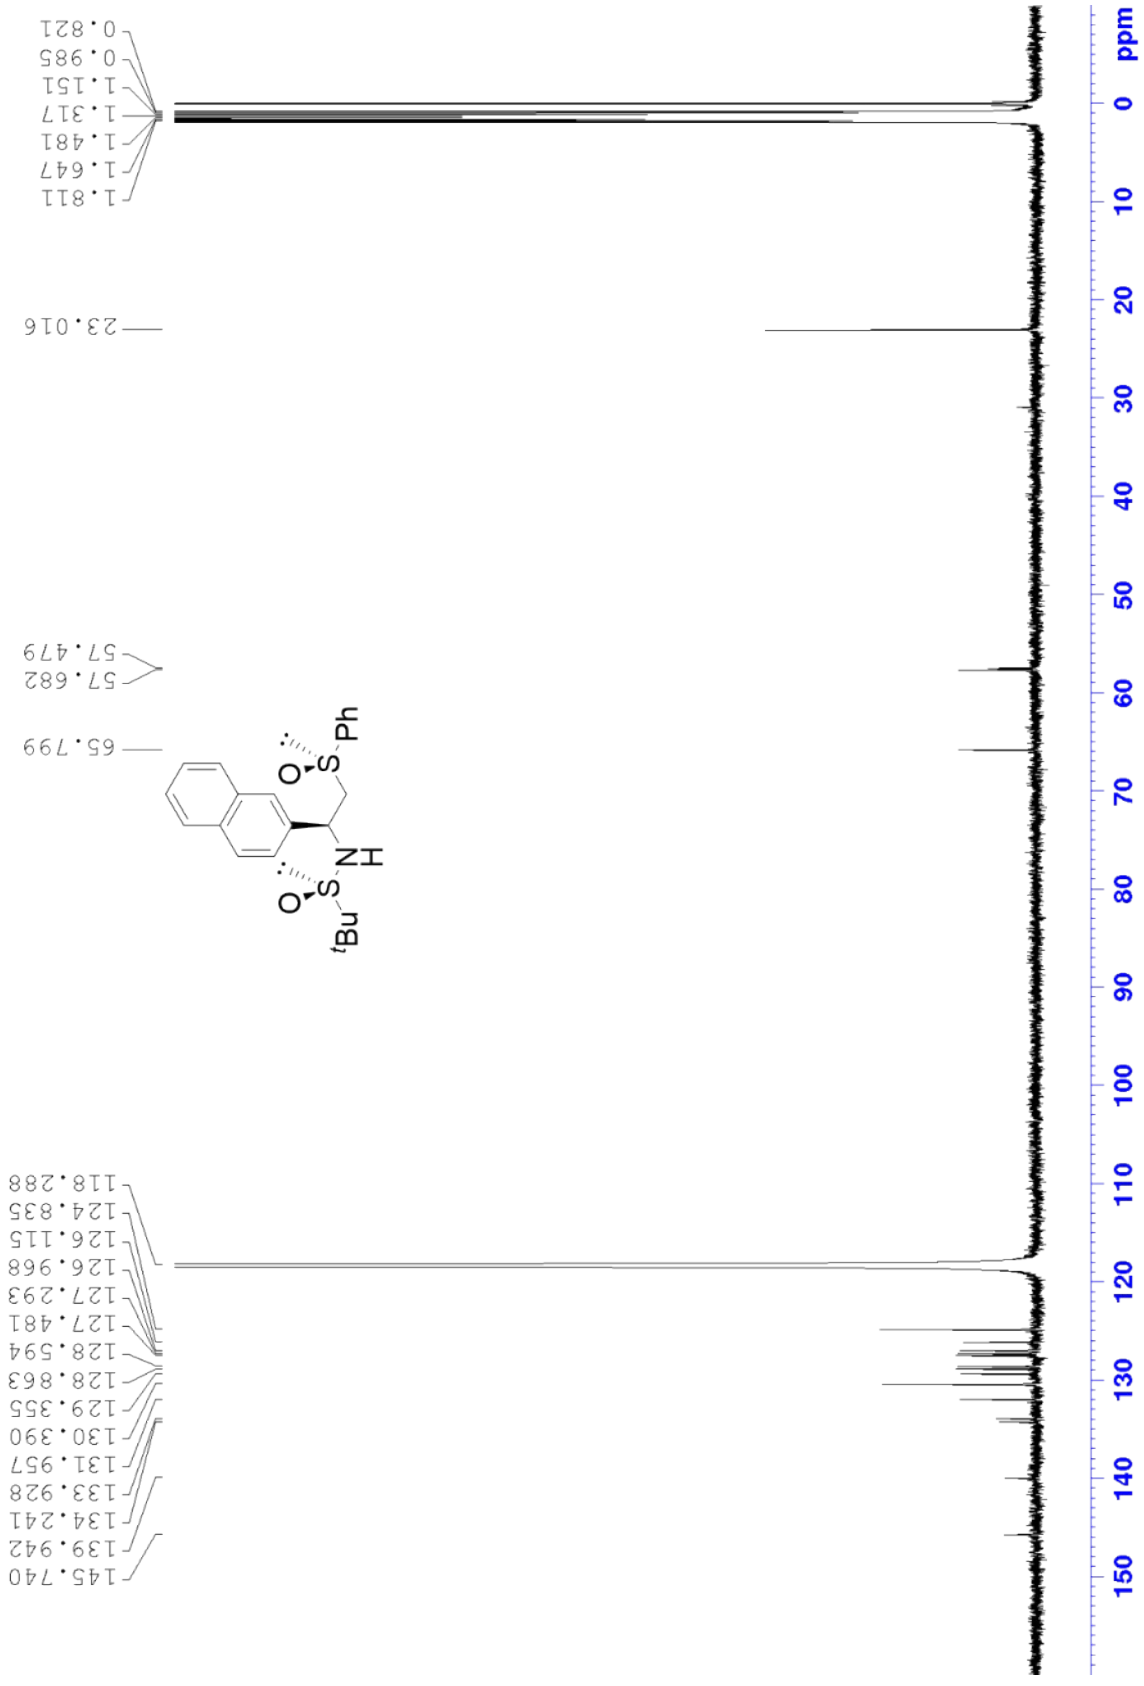

*(R<sub>S</sub>,S<sub>C</sub>,S<sub>S</sub>)-N-[1-(2-Naphthyl)-2-(phenylsulfinyl)ethyl]-2-methyl-2-propanesulfinamide, 7(R<sub>S</sub>,S<sub>C</sub>,S<sub>S</sub>)*

<sup>1</sup>H-NMR (500 MHz, CD<sub>3</sub>CN)

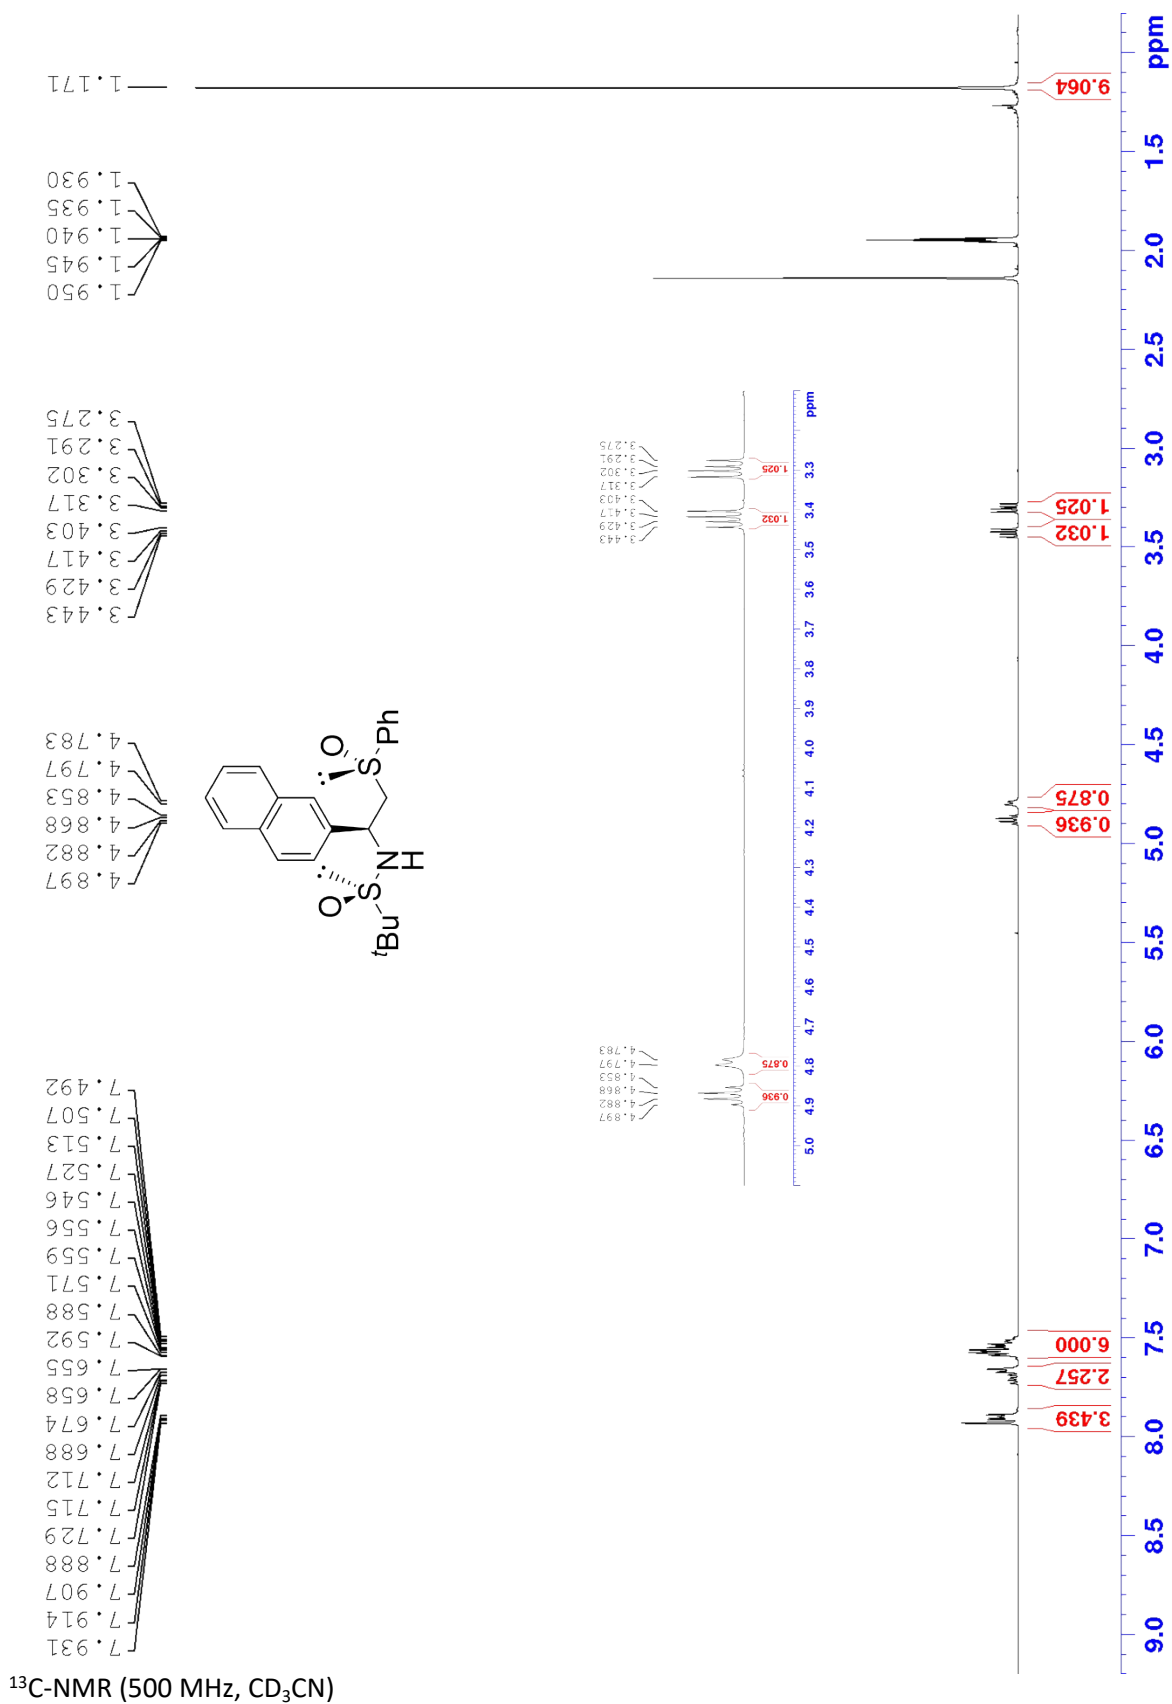



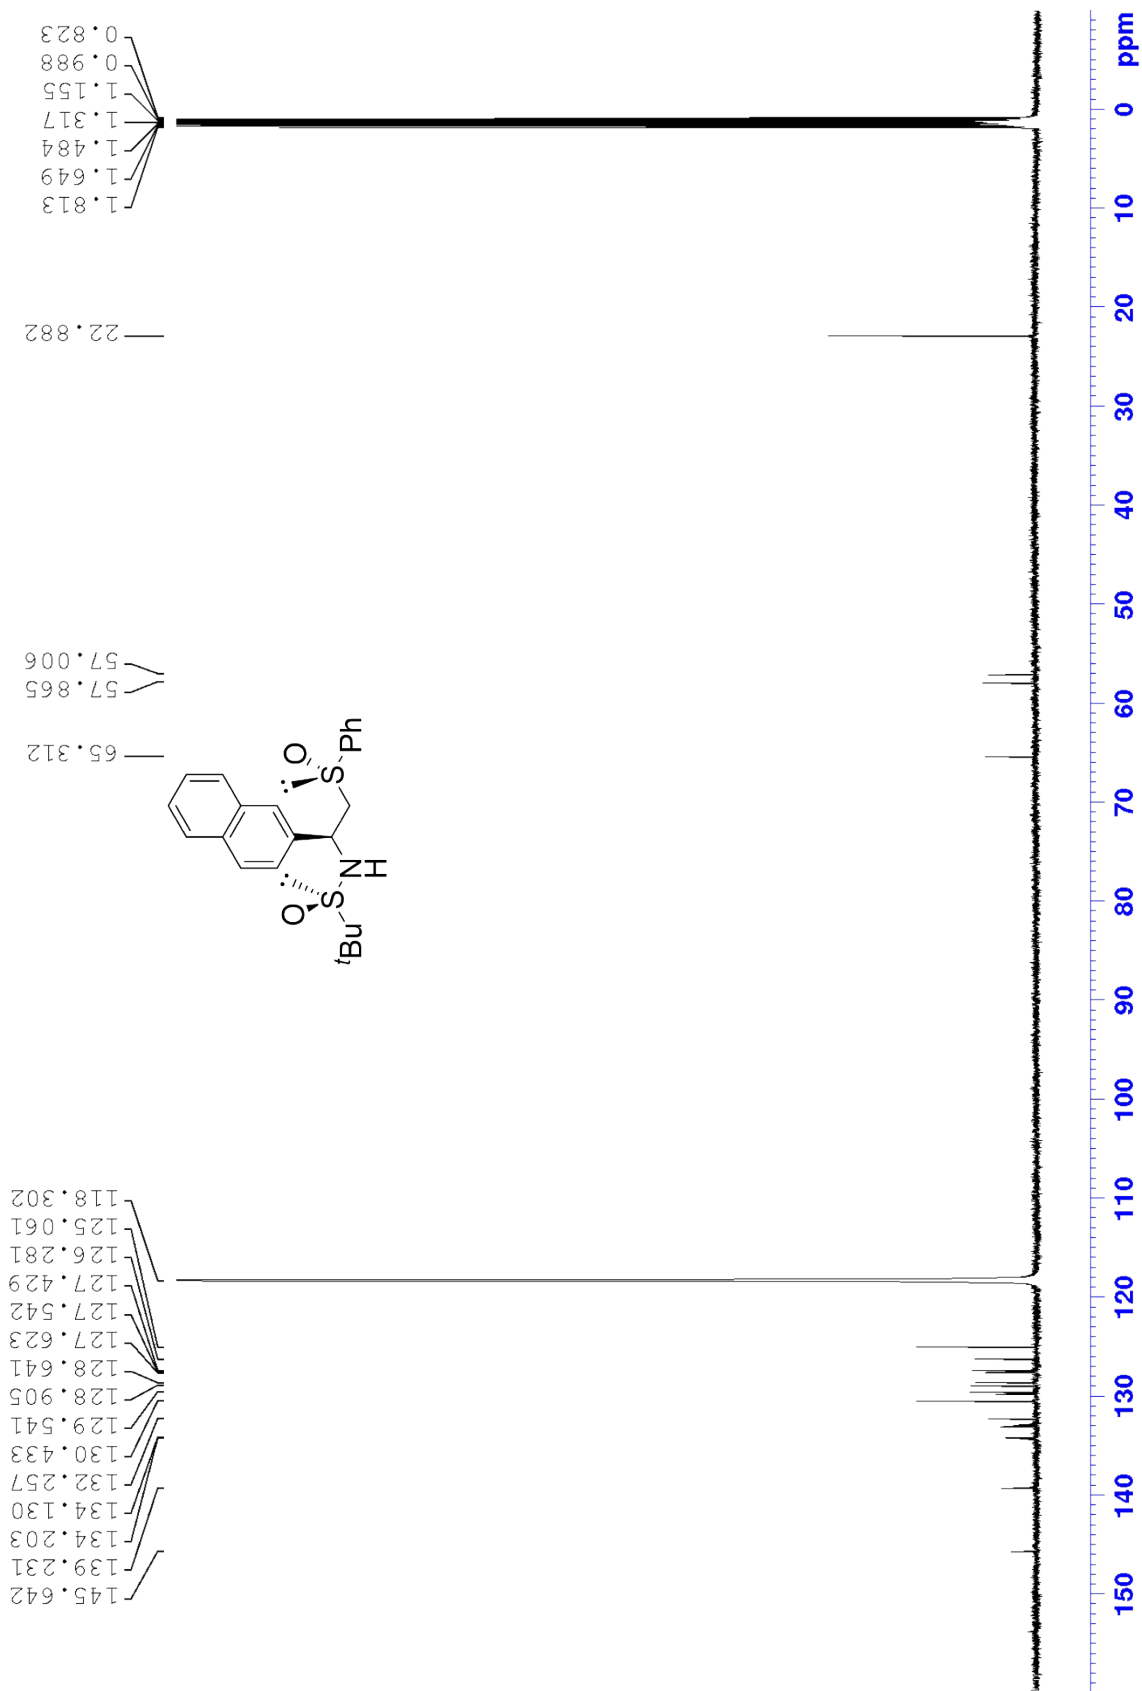

$(R_S, S_C, R_S)$ -N-[1-Phenyl-2-(phenylsulfinyl)ethyl]-2-methyl-2-propanesulfonamide, **8** ( $R_S, S_C, R_S$ )



*(R<sub>S</sub>,S<sub>C</sub>,S<sub>S</sub>)-N-[1-Phenyl-2-(phenylsulfinyl)ethyl]-2-methyl-2-propanesulfinamide, 8* (*R<sub>S</sub>,S<sub>C</sub>,S<sub>S</sub>*)

<sup>1</sup>H-NMR (500 MHz, CD<sub>3</sub>CN)

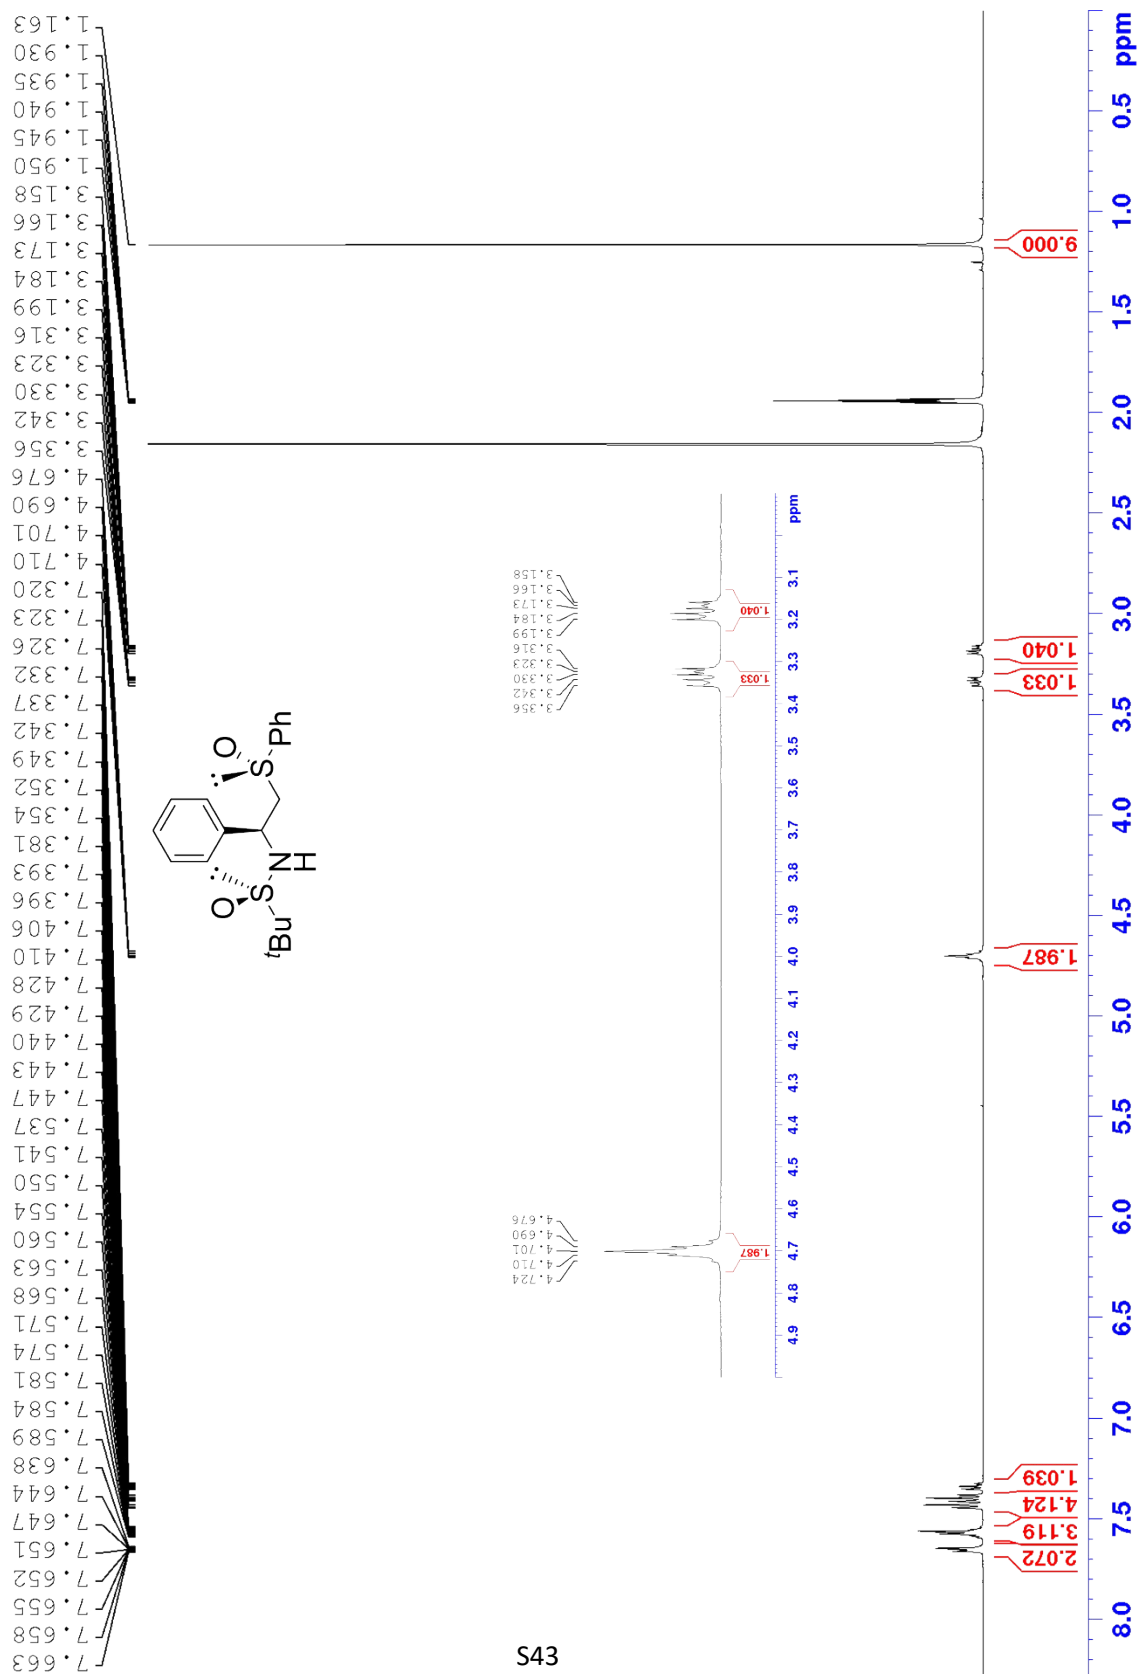

$^{13}\text{C}$ -NMR (500 MHz,  $\text{CD}_3\text{CN}$ )

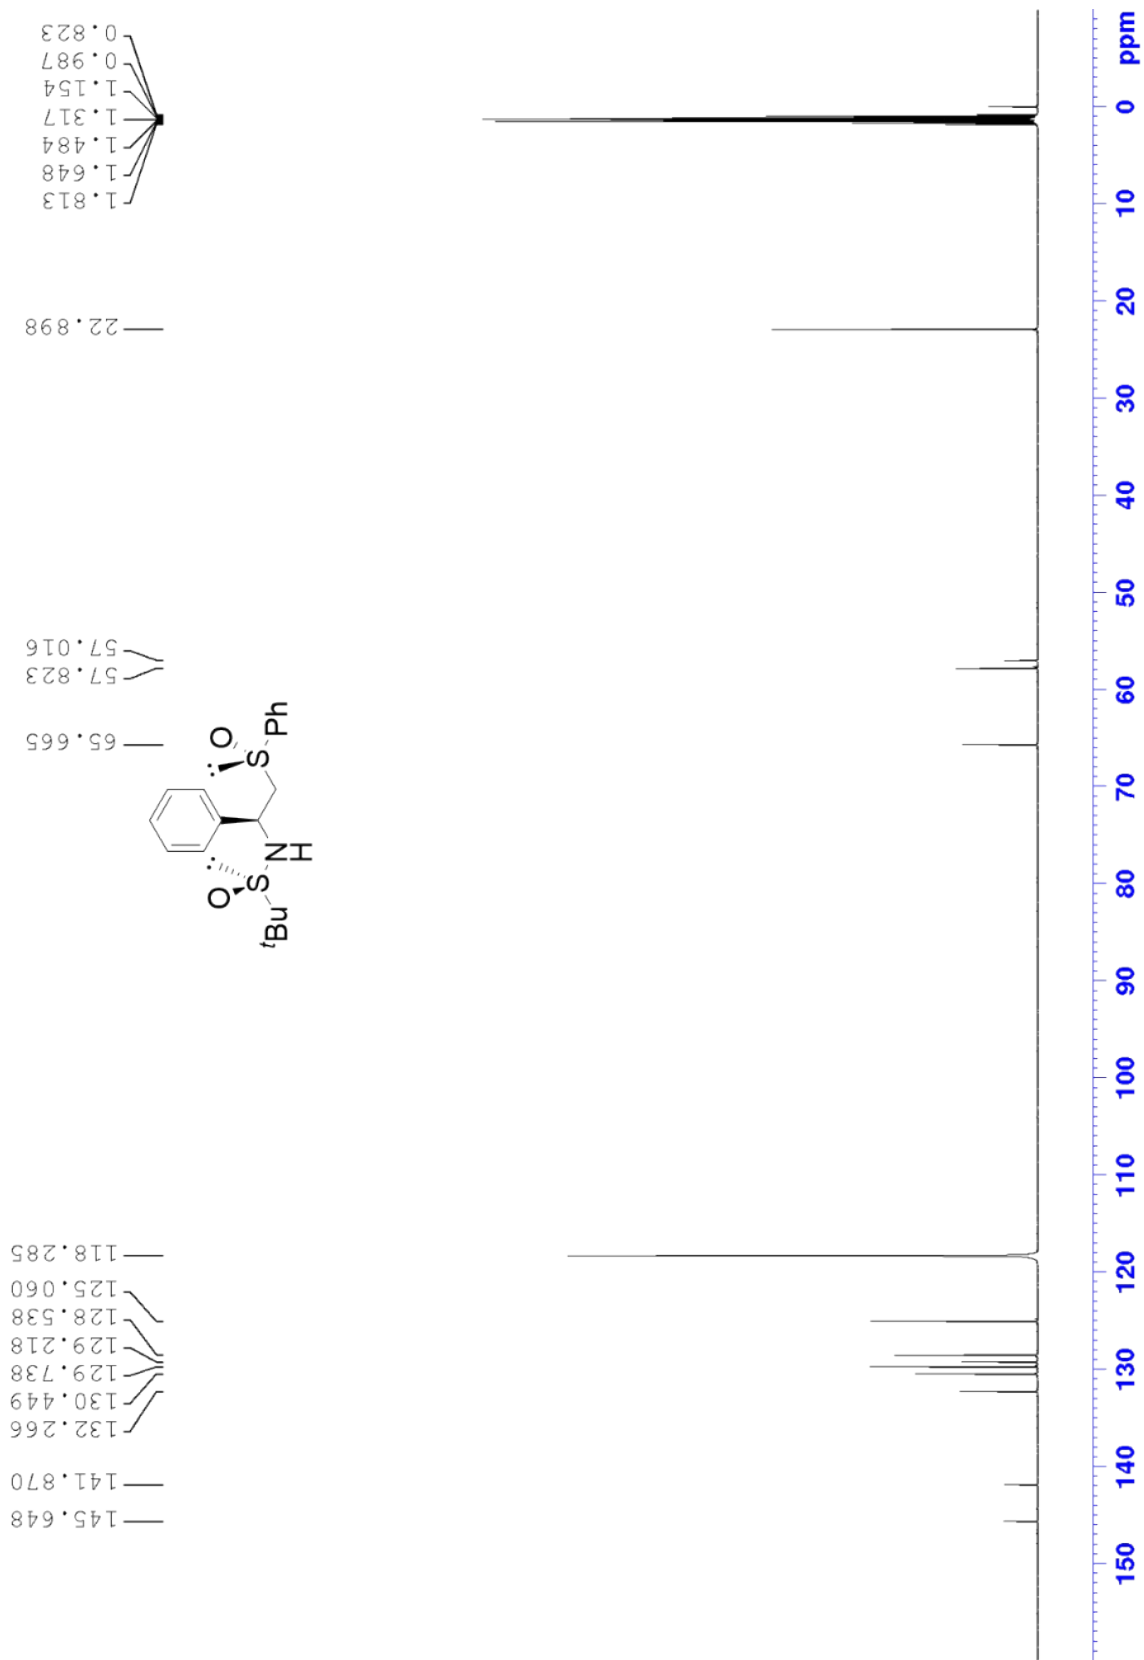



<sup>13</sup>C-NMR (500 MHz, CD<sub>3</sub>CN)

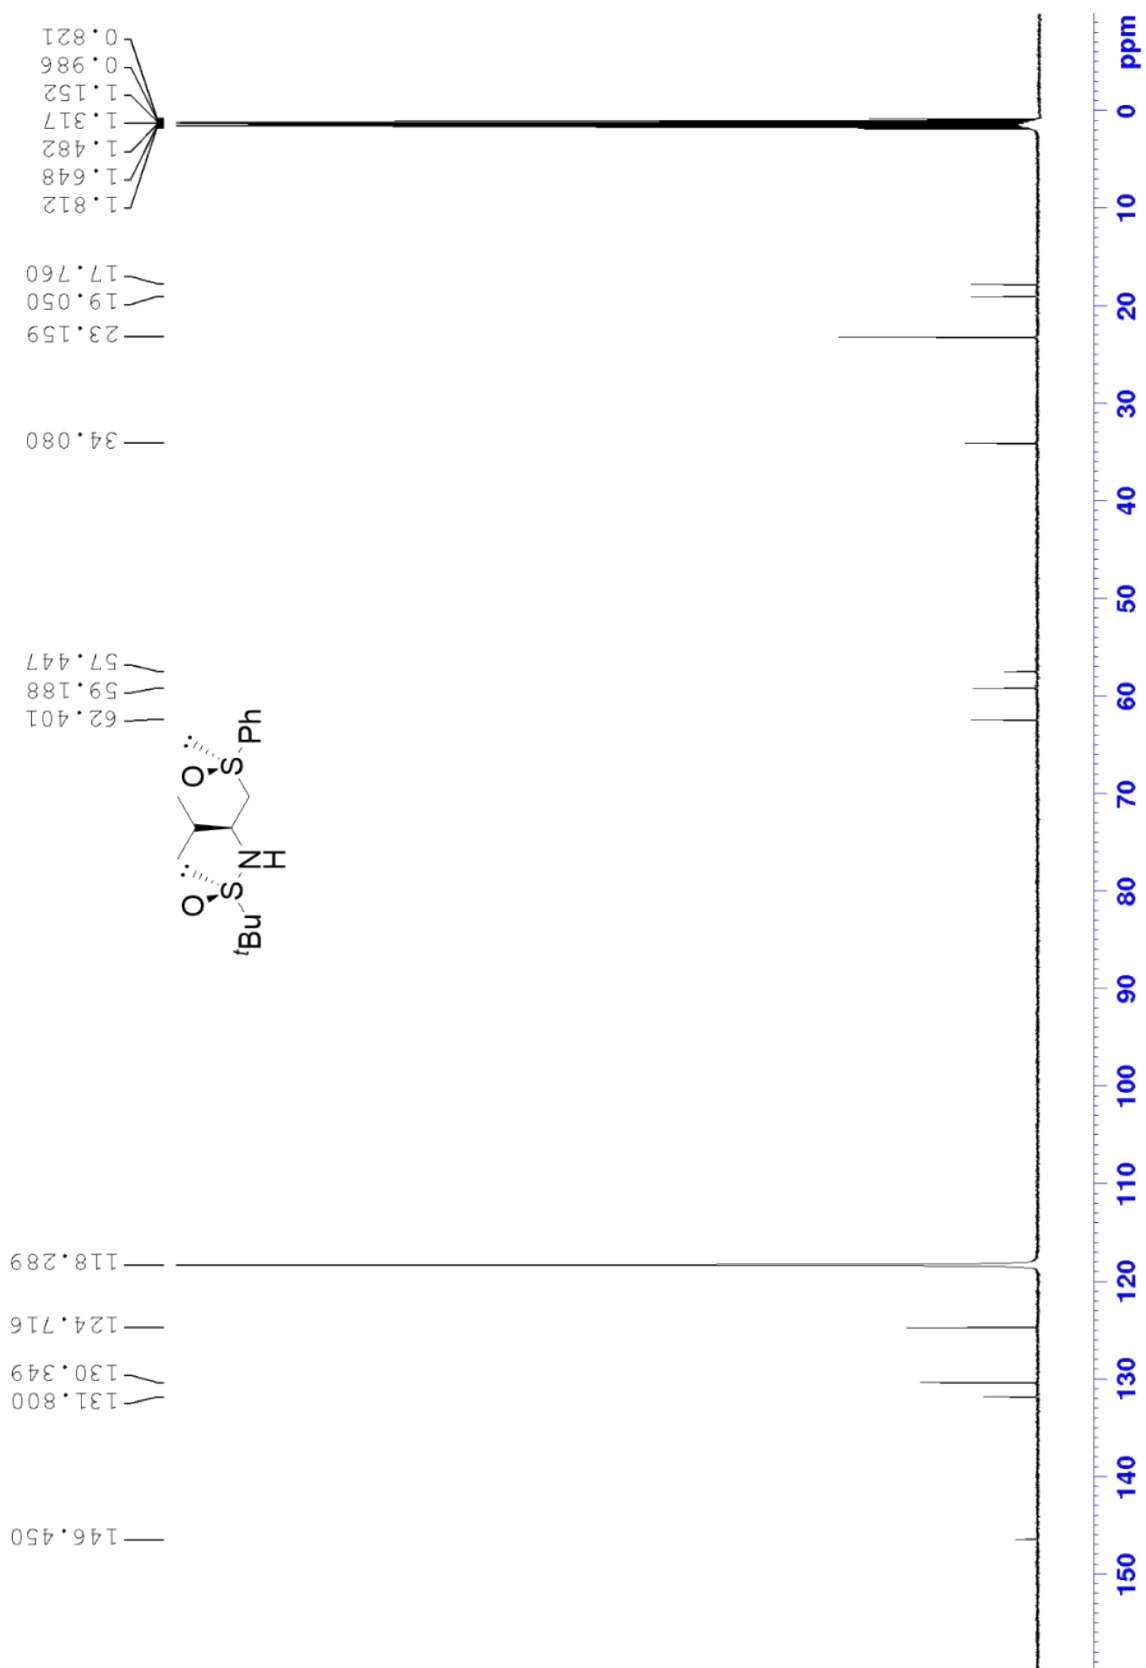

*(R<sub>S</sub>,S<sub>C</sub>,S<sub>S</sub>)-N-[1-(Phenylsulfinyl)-3-methylbut-2-yl]-2-methyl-2-propanesulfinamide, 9(R<sub>S</sub>,S<sub>C</sub>,S<sub>S</sub>)*

<sup>1</sup>H-NMR (500 MHz, CD<sub>3</sub>CN)

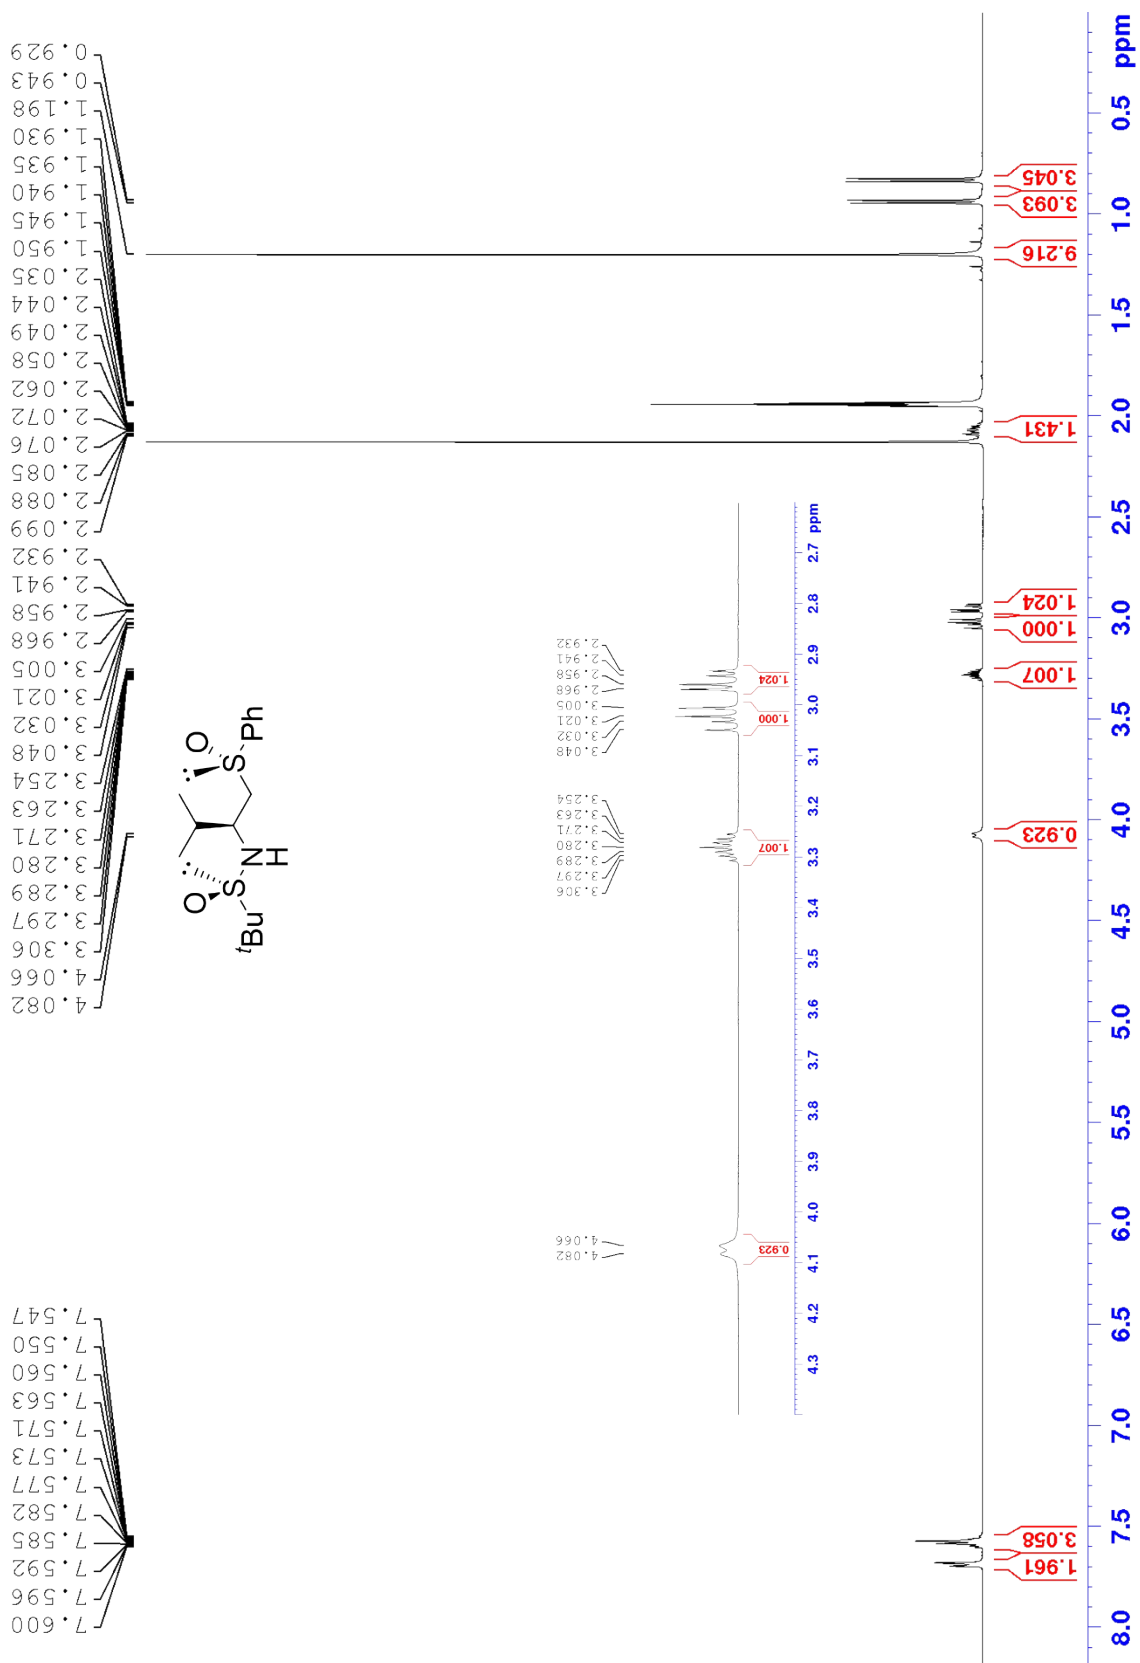

$^{13}\text{C-NMR}$  (500 MHz,  $\text{CD}_3\text{CN}$ )

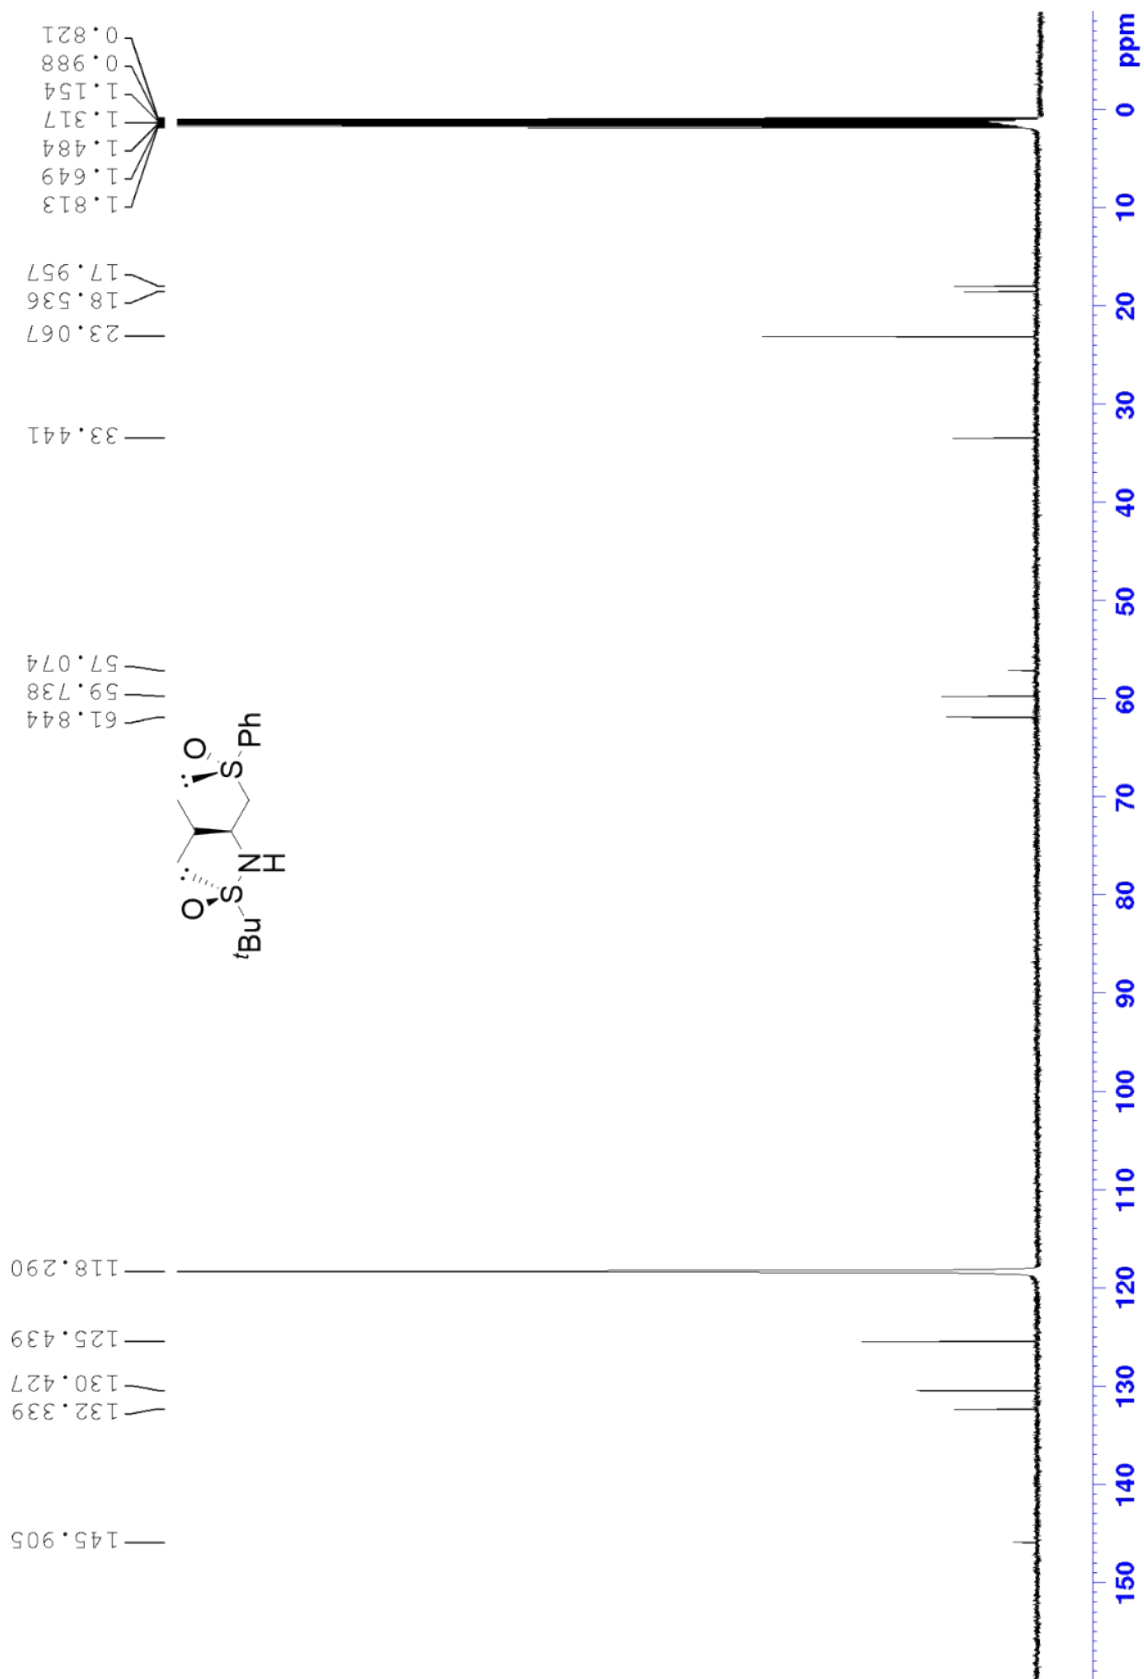



*(R<sub>S</sub>,S<sub>C</sub>,R<sub>S</sub>)-N-[1-(2-Naphthyl)-2-(tert-butylsulfinyl)ethyl]-2-methyl-2-propanesulfonamide, 10(R<sub>S</sub>,S<sub>C</sub>,R<sub>S</sub>)*

<sup>1</sup>H-NMR (500 MHz, CD<sub>3</sub>CN)

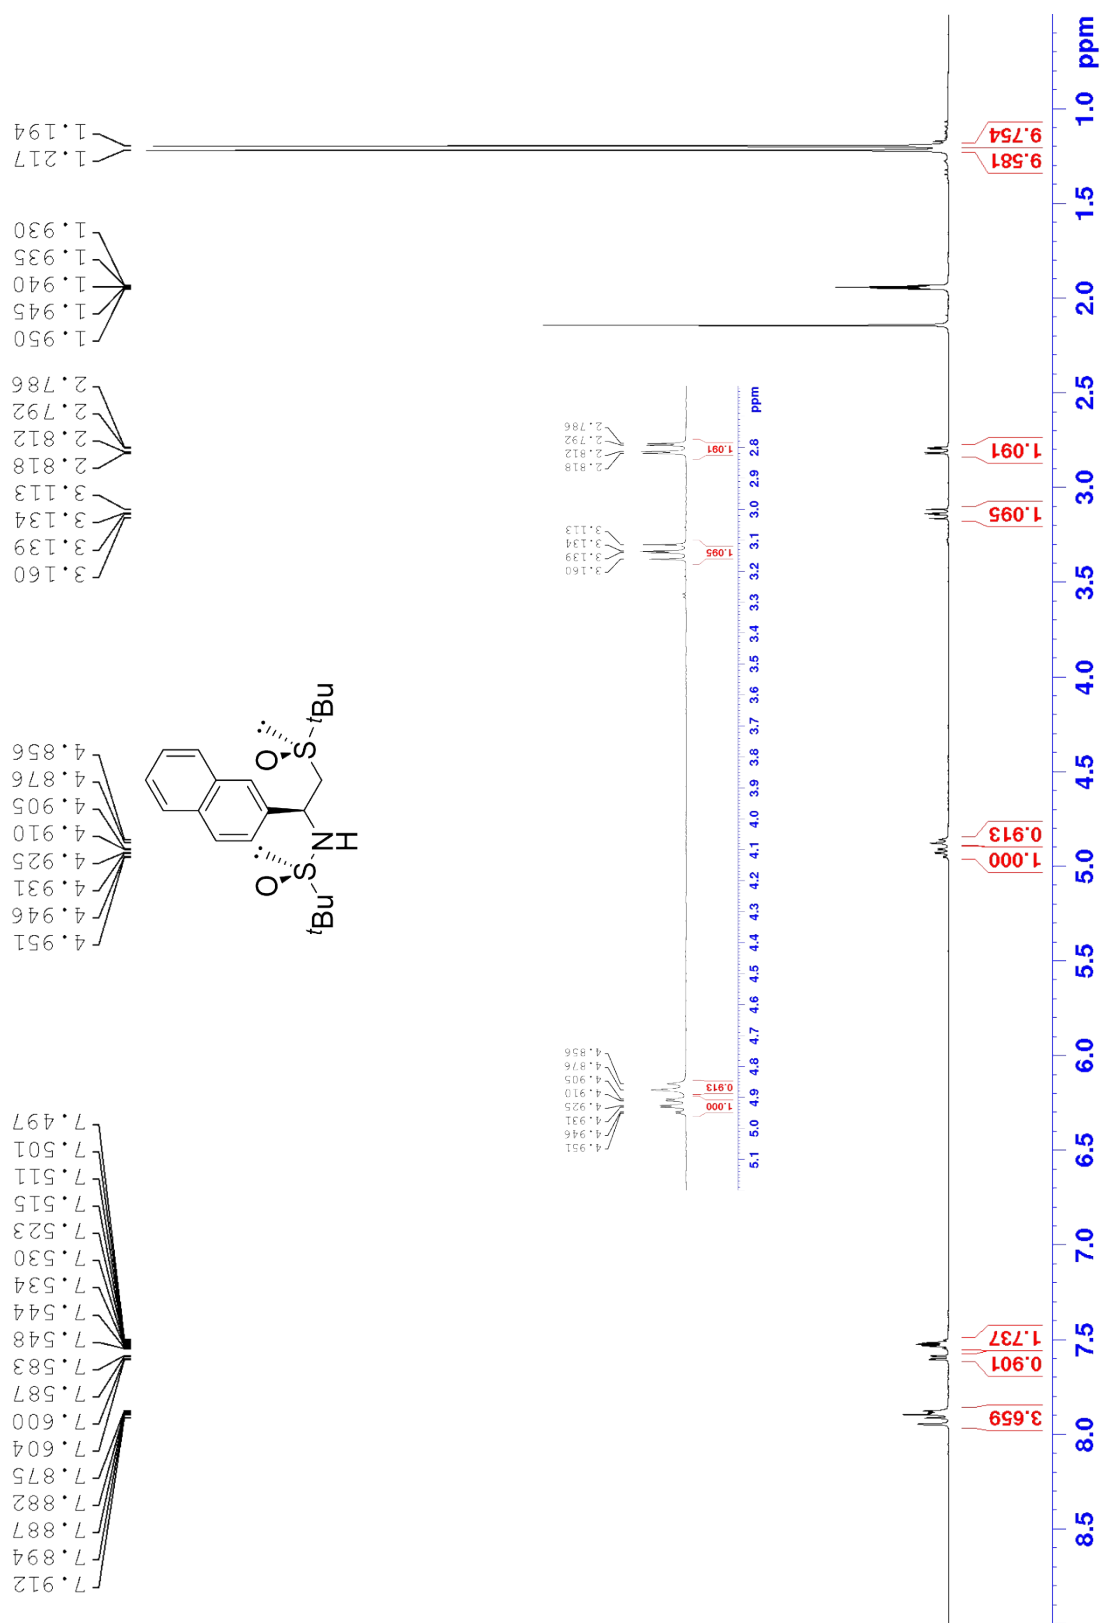

<sup>13</sup>C-NMR (500 MHz, CD<sub>3</sub>CN)

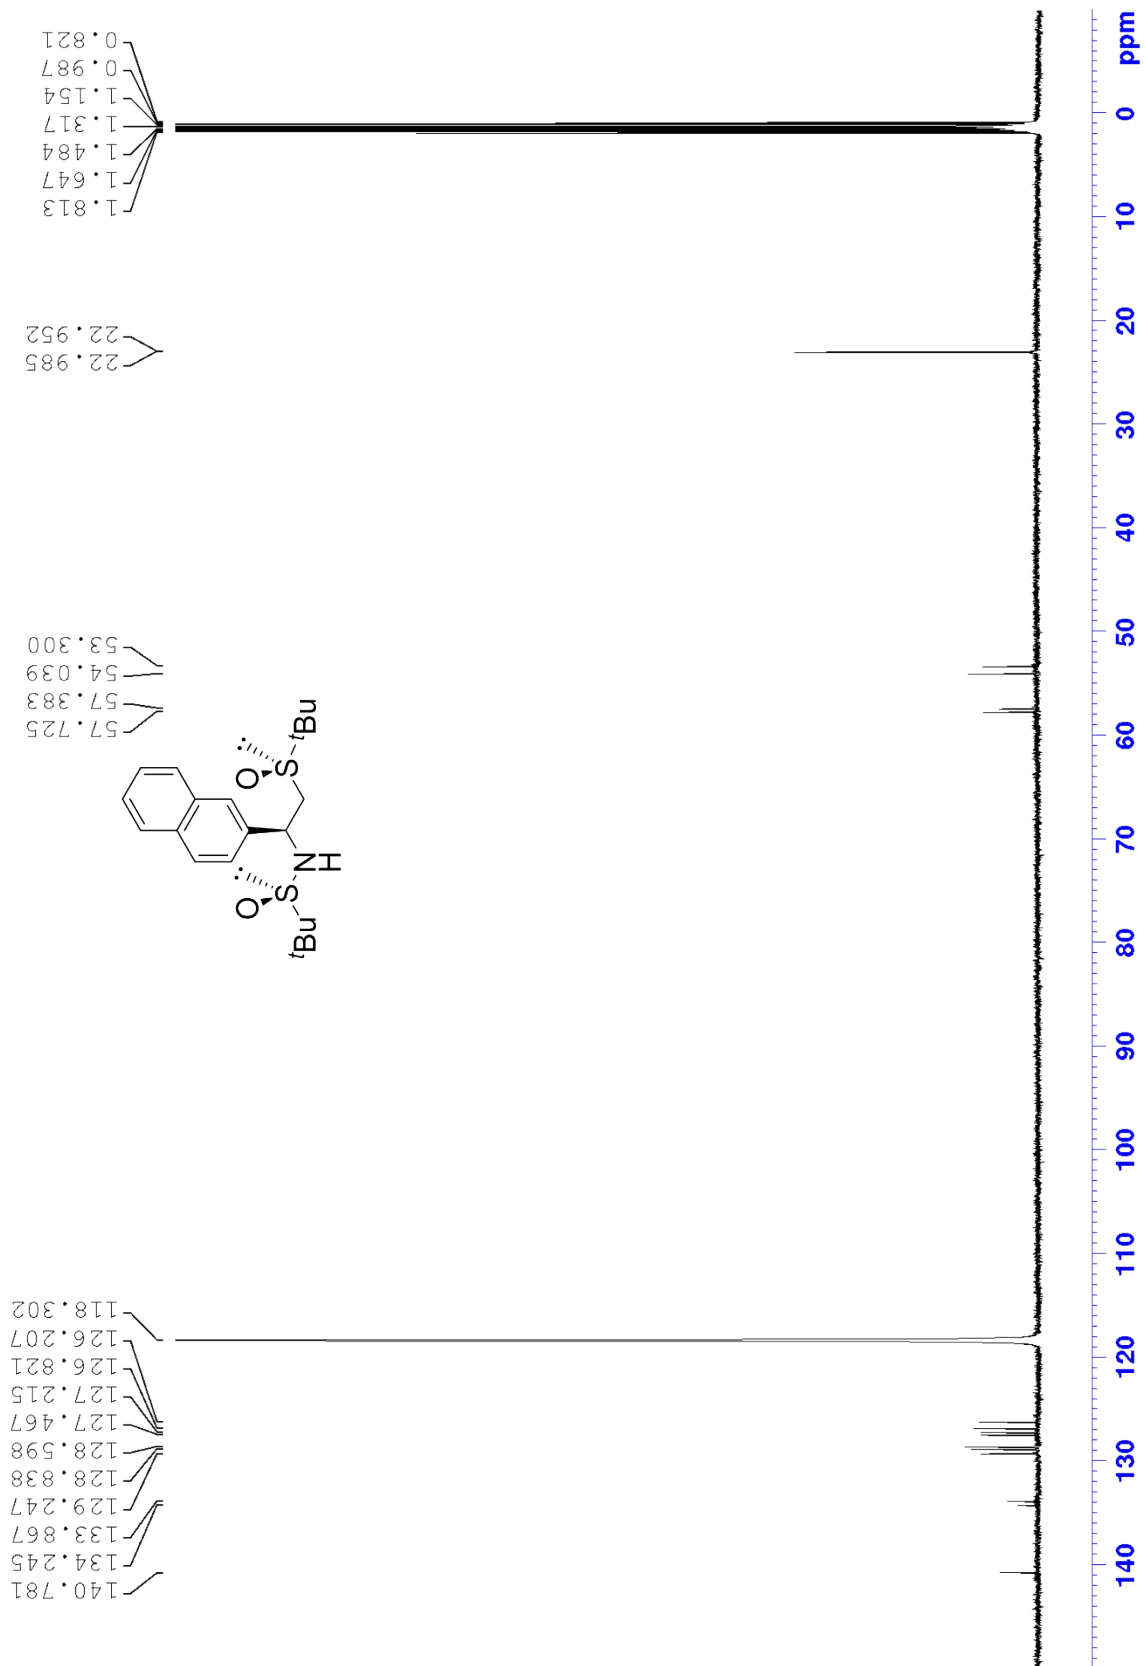

*(R<sub>S</sub>,S<sub>C</sub>,S<sub>S</sub>)-N-[1-(2-Naphthyl)-2-(tert-butylsulfinyl)ethyl]-2-methyl-2-propanesulfinamide, 10* (*R<sub>S</sub>,S<sub>C</sub>,S<sub>S</sub>*)

<sup>1</sup>H-NMR (500 MHz, CD<sub>3</sub>CN)

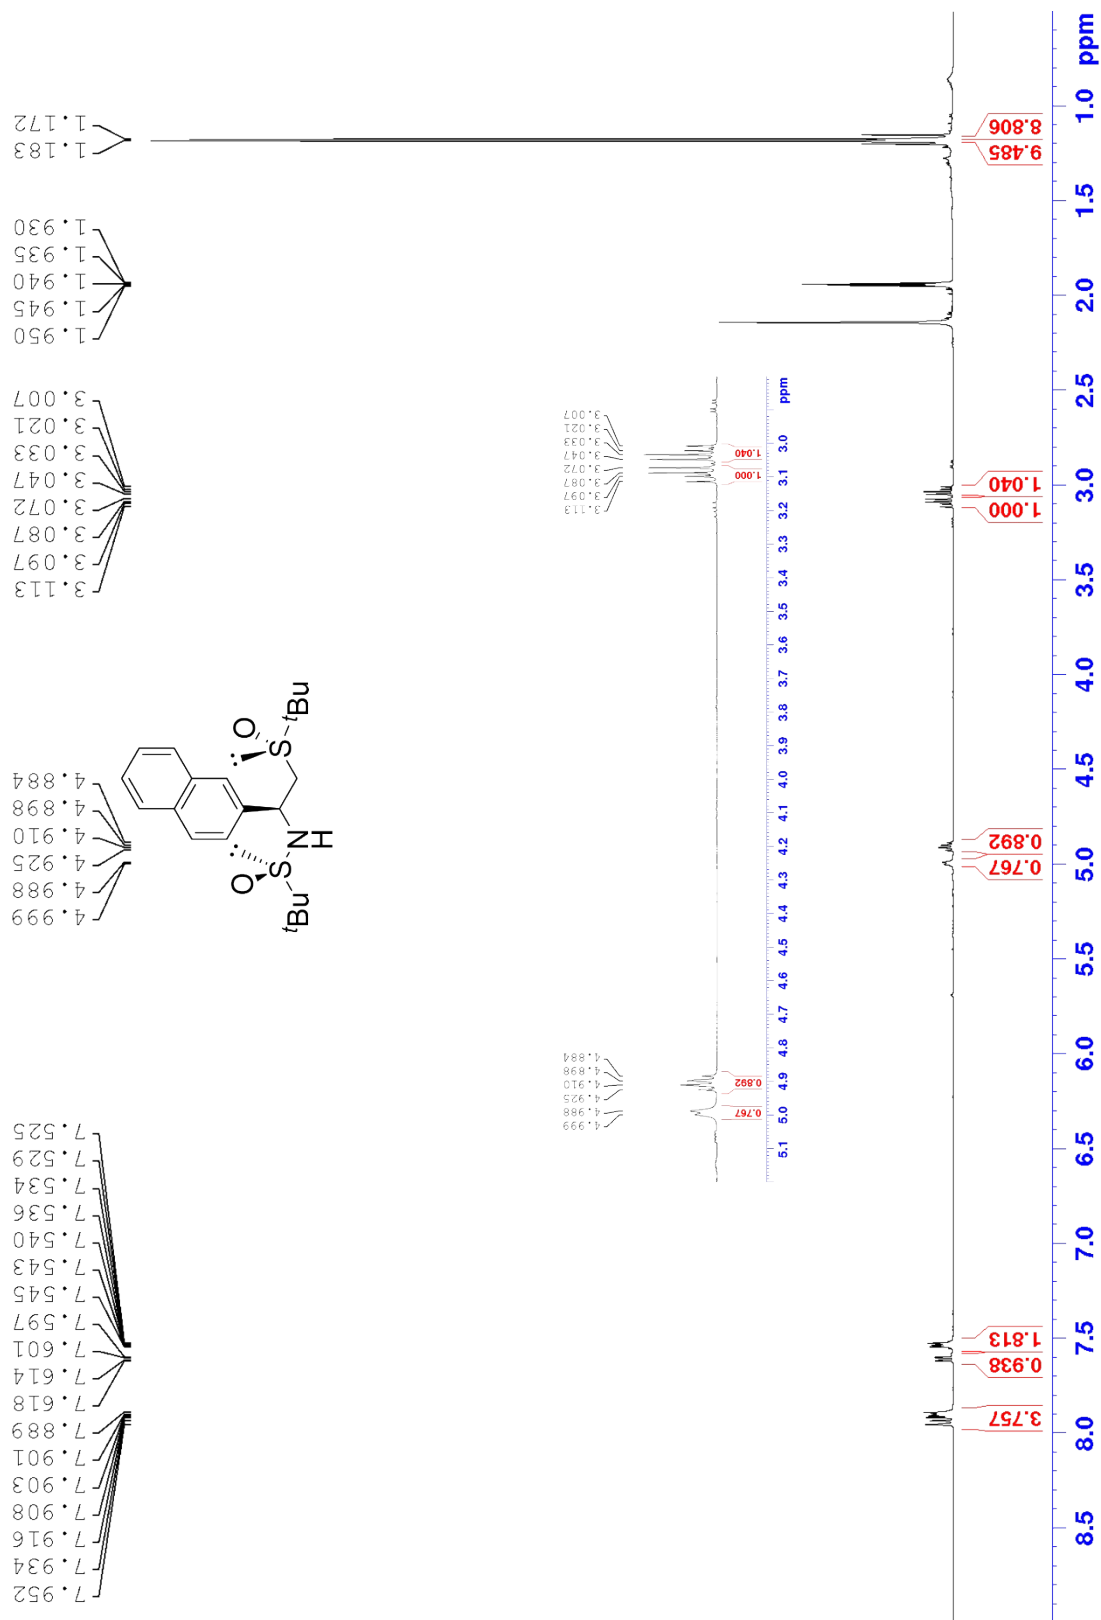

<sup>13</sup>C-NMR (500 MHz, CD<sub>3</sub>CN)

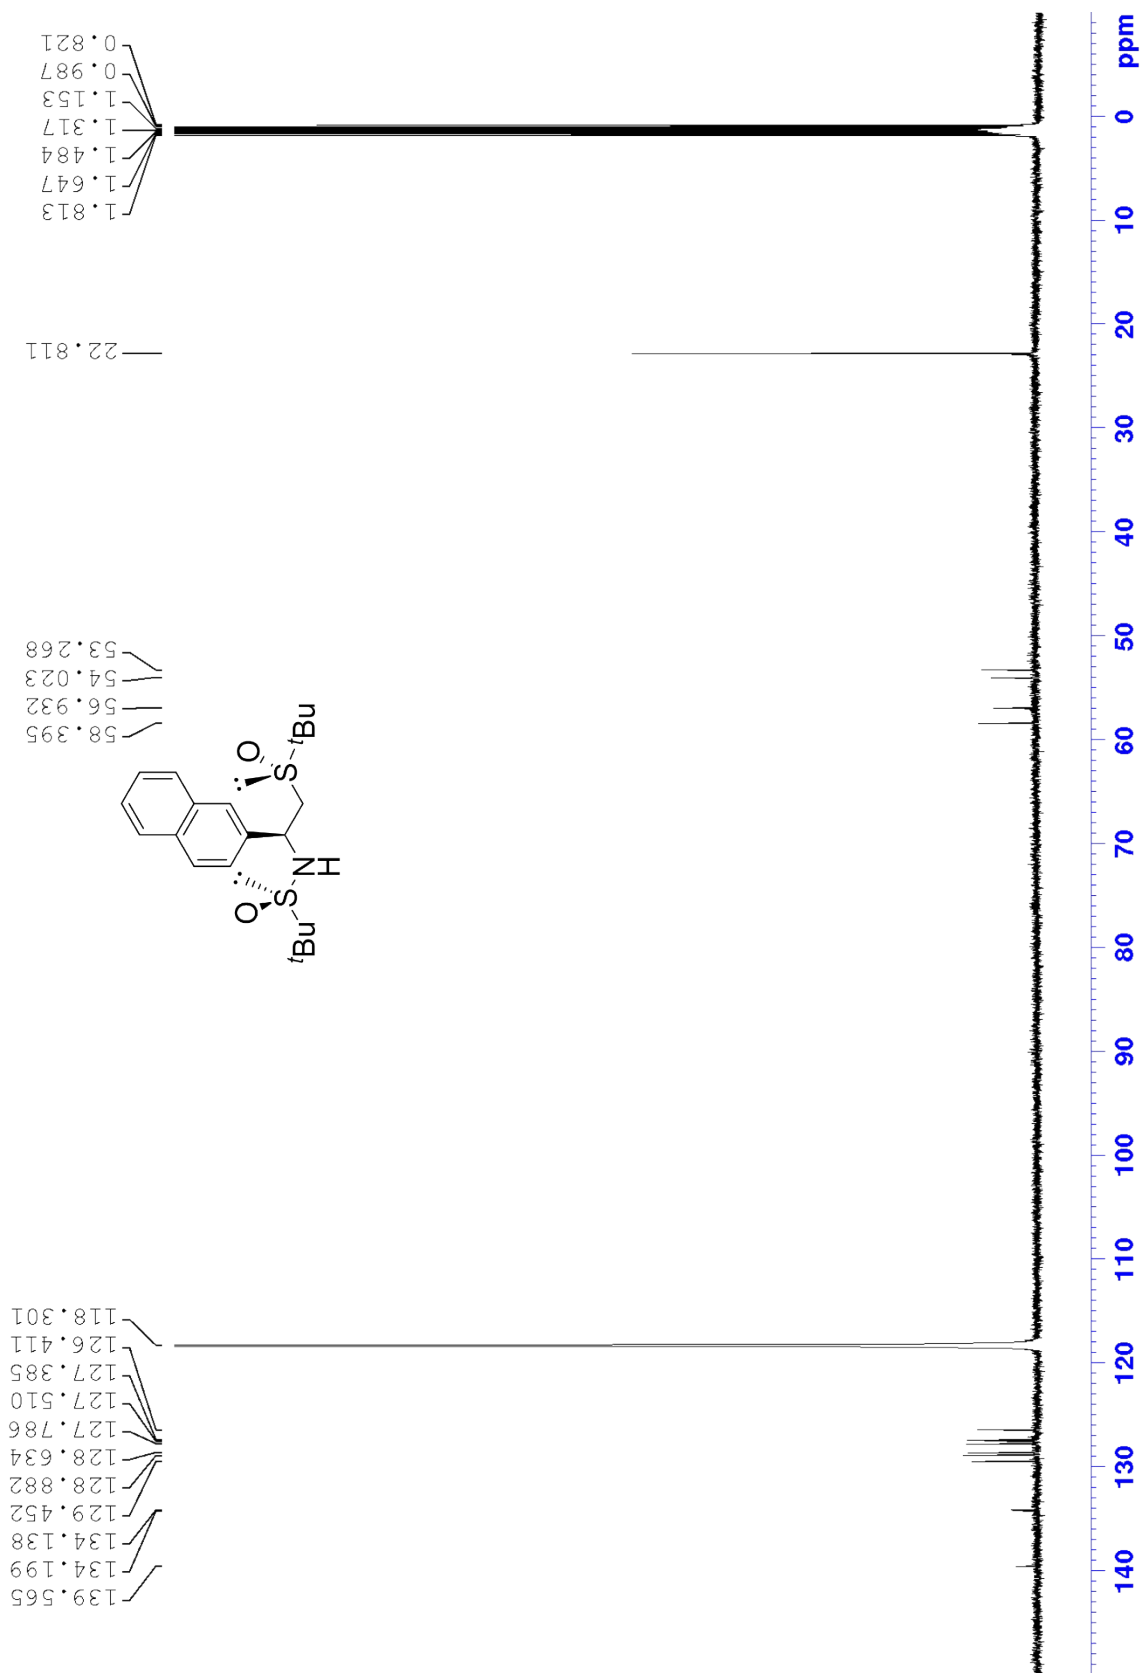

*(R<sub>S</sub>,S<sub>C</sub>,R<sub>S</sub>)-N-[2-(tert-butylsulfinyl)-1-phenylethyl]-2-methyl-2-propanesulfinamide, 11(R<sub>S</sub>,S<sub>C</sub>,R<sub>S</sub>)*

<sup>1</sup>H-NMR (500 MHz, CD<sub>3</sub>CN)

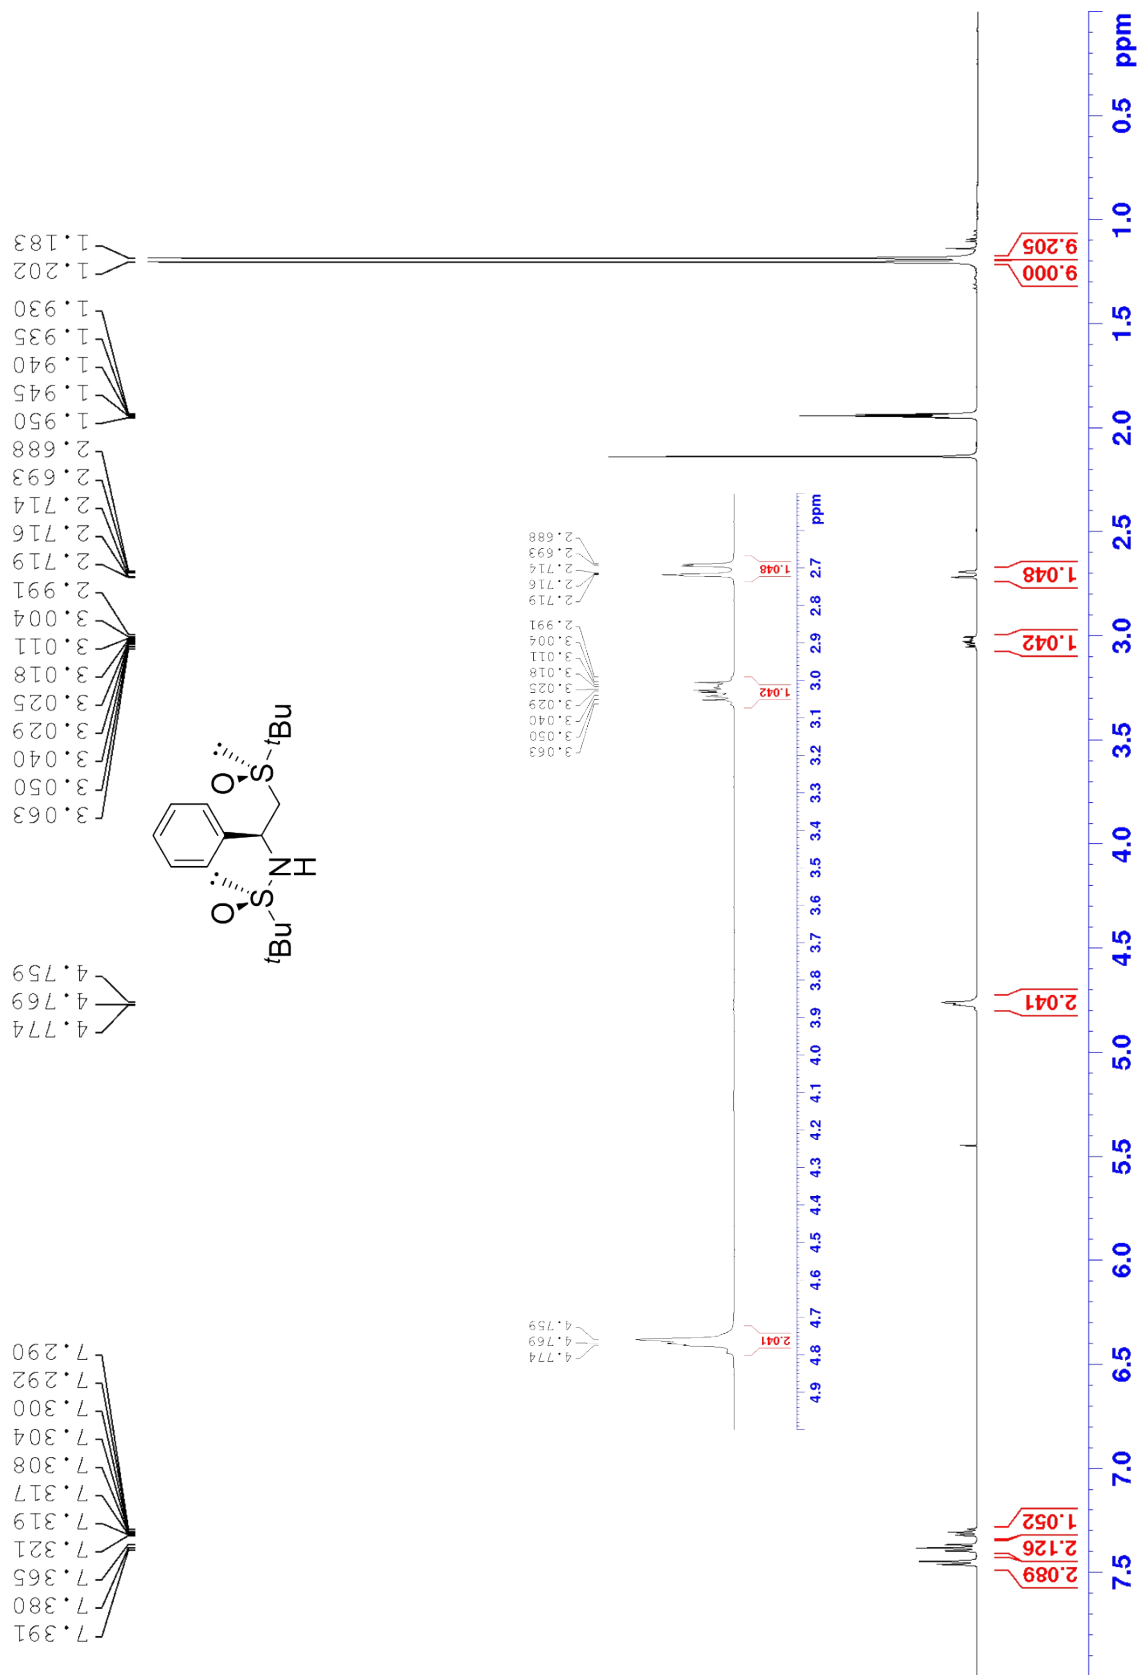

$^{13}\text{C}$ -NMR (500 MHz,  $\text{CD}_3\text{CN}$ )

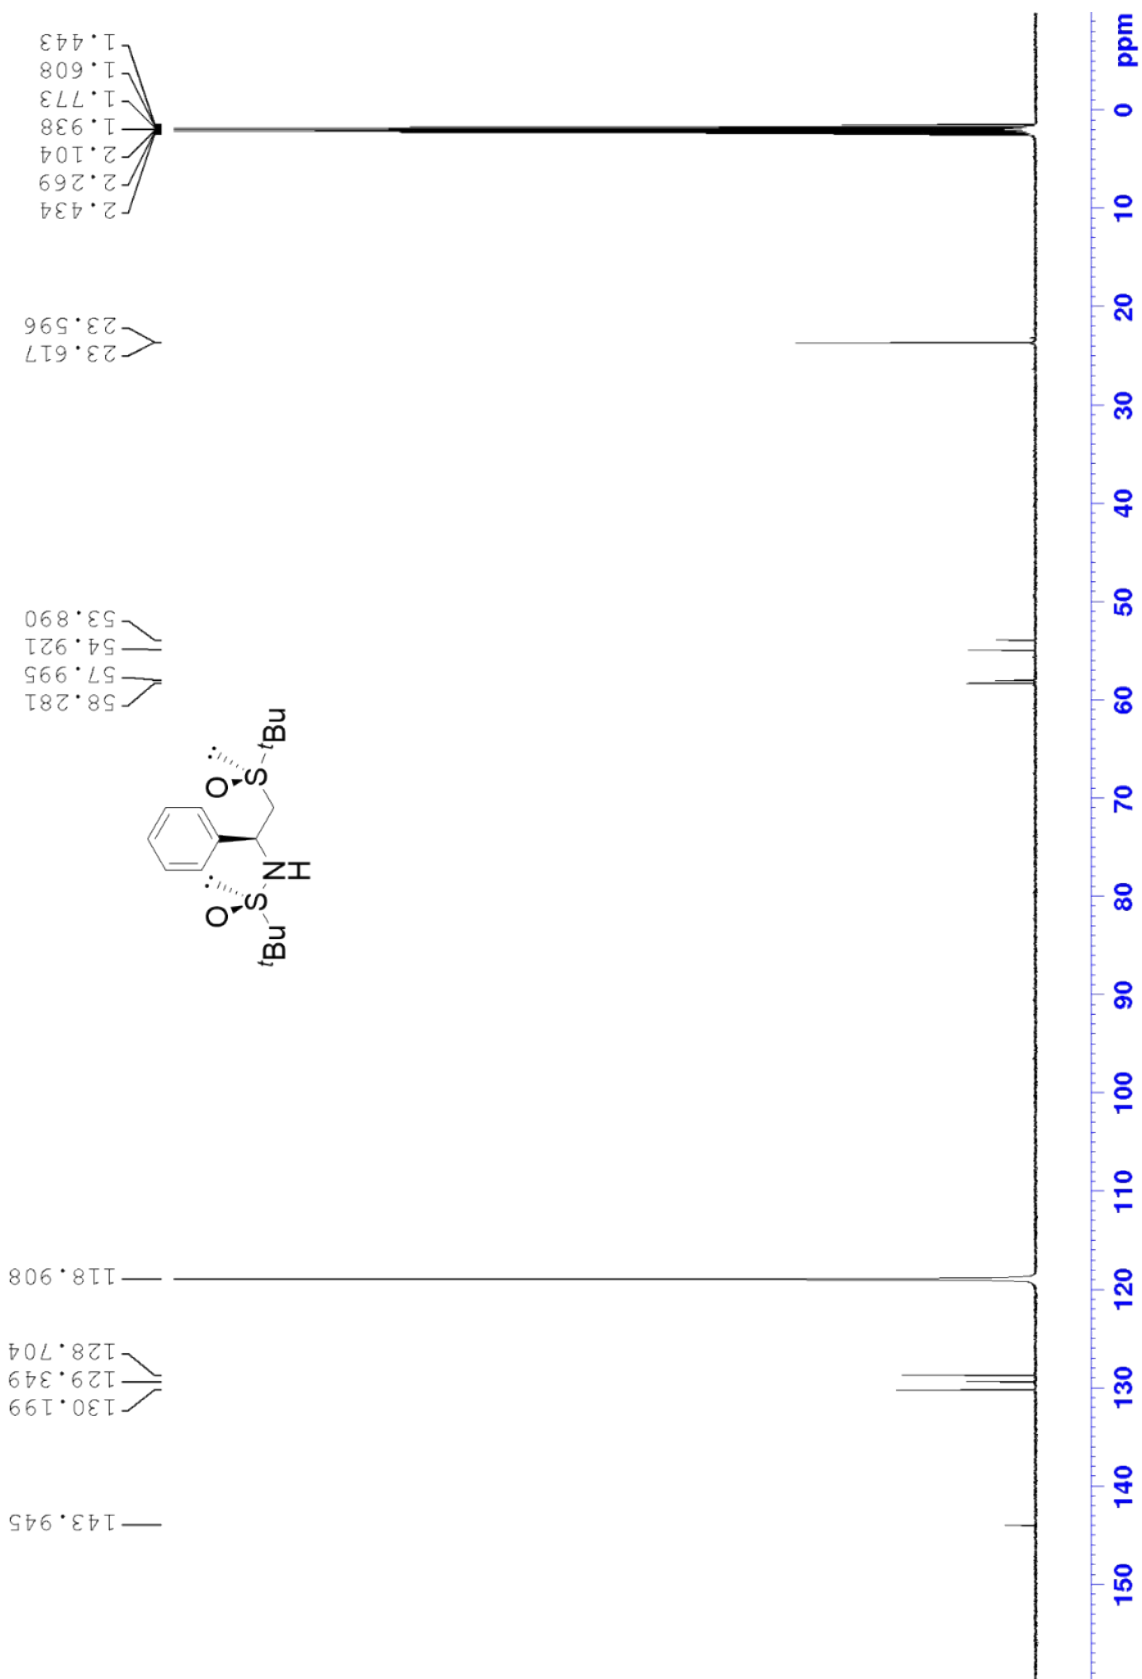

*(R<sub>S</sub>S<sub>C</sub>S<sub>S</sub>)-N-[2-(tert-butylsulfinyl)-1-phenylethyl]-2-methyl-2-propanesulfonamide, 11(R<sub>S</sub>,S<sub>C</sub>,S<sub>S</sub>)*

<sup>1</sup>H-NMR (500 MHz, CD<sub>3</sub>CN)

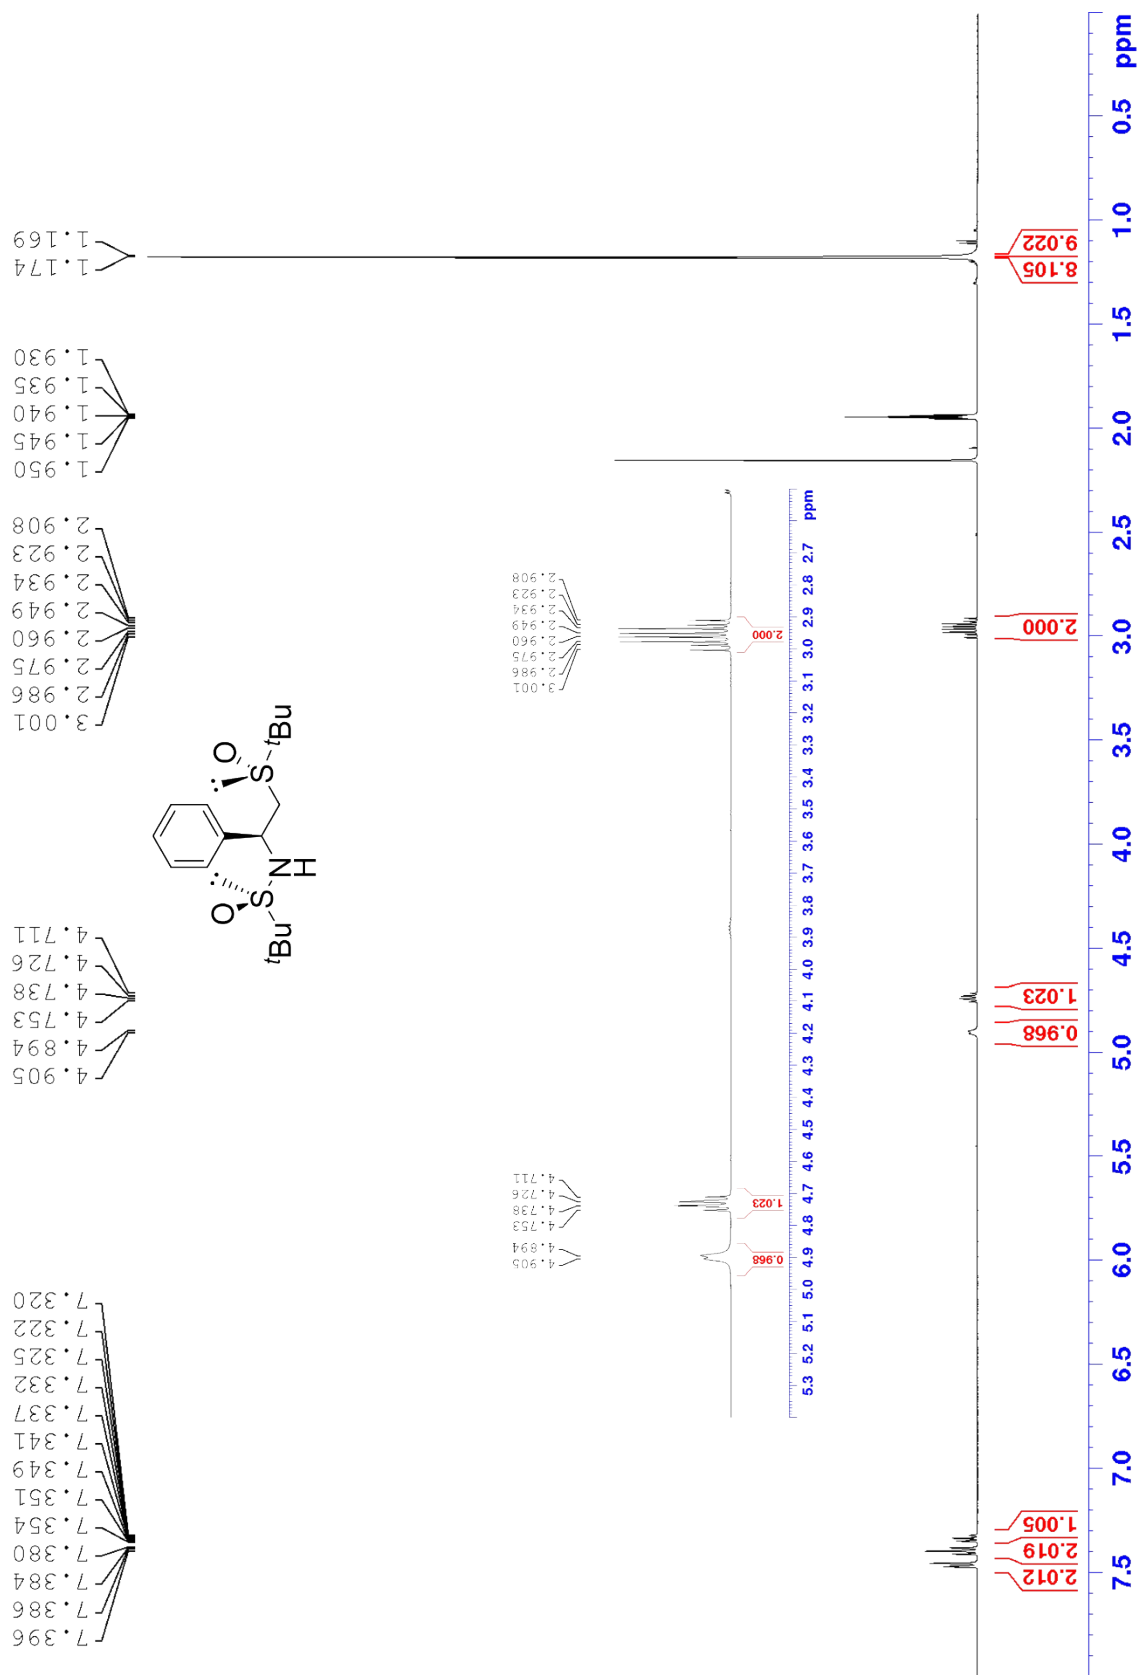

$^{13}\text{C}$ -NMR (500 MHz,  $\text{CD}_3\text{CN}$ )

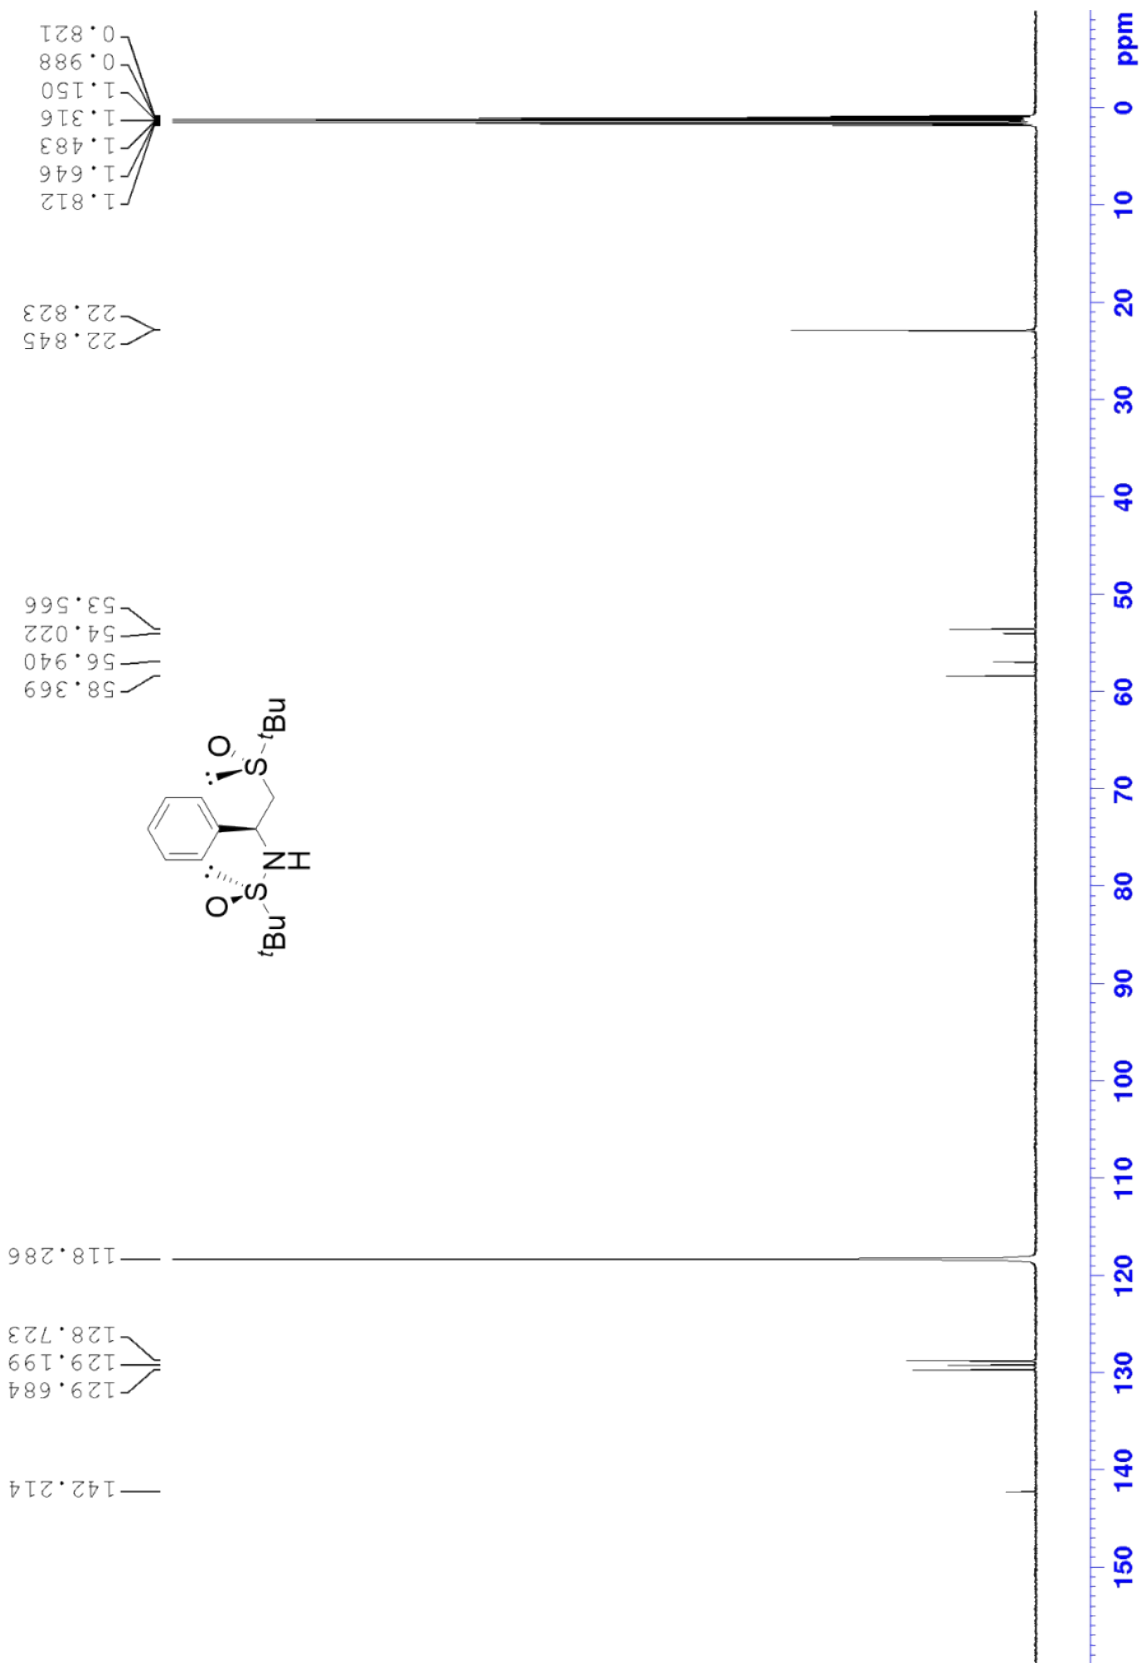





$^{13}\text{C}$ -NMR (500 MHz,  $\text{CD}_3\text{CN}$ )

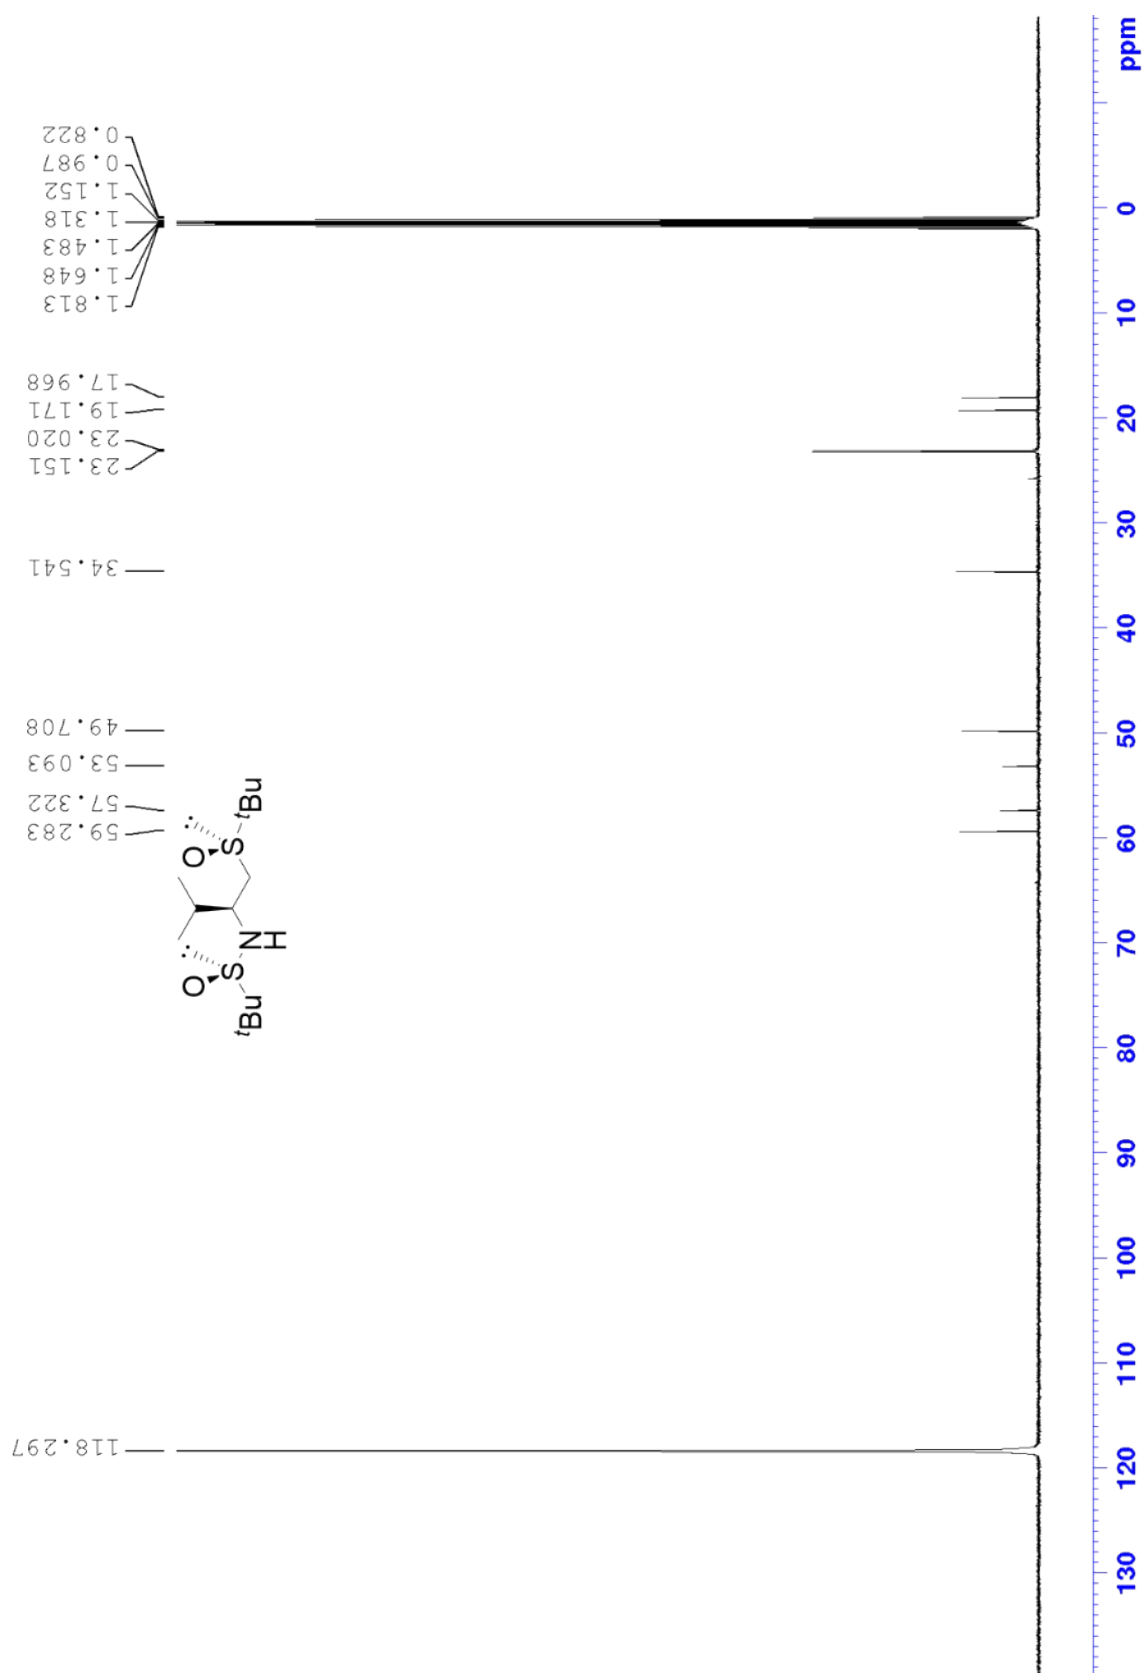

*(R<sub>S</sub>,S<sub>C</sub>,S<sub>S</sub>)-N-[1-(tert-butylsulfinyl)-3-methylbutan-2-yl]-2-methyl-2-propanesulfonamide, 12(R<sub>S</sub>,S<sub>C</sub>,S<sub>S</sub>)*

<sup>1</sup>H-NMR (500 MHz, CD<sub>3</sub>CN)

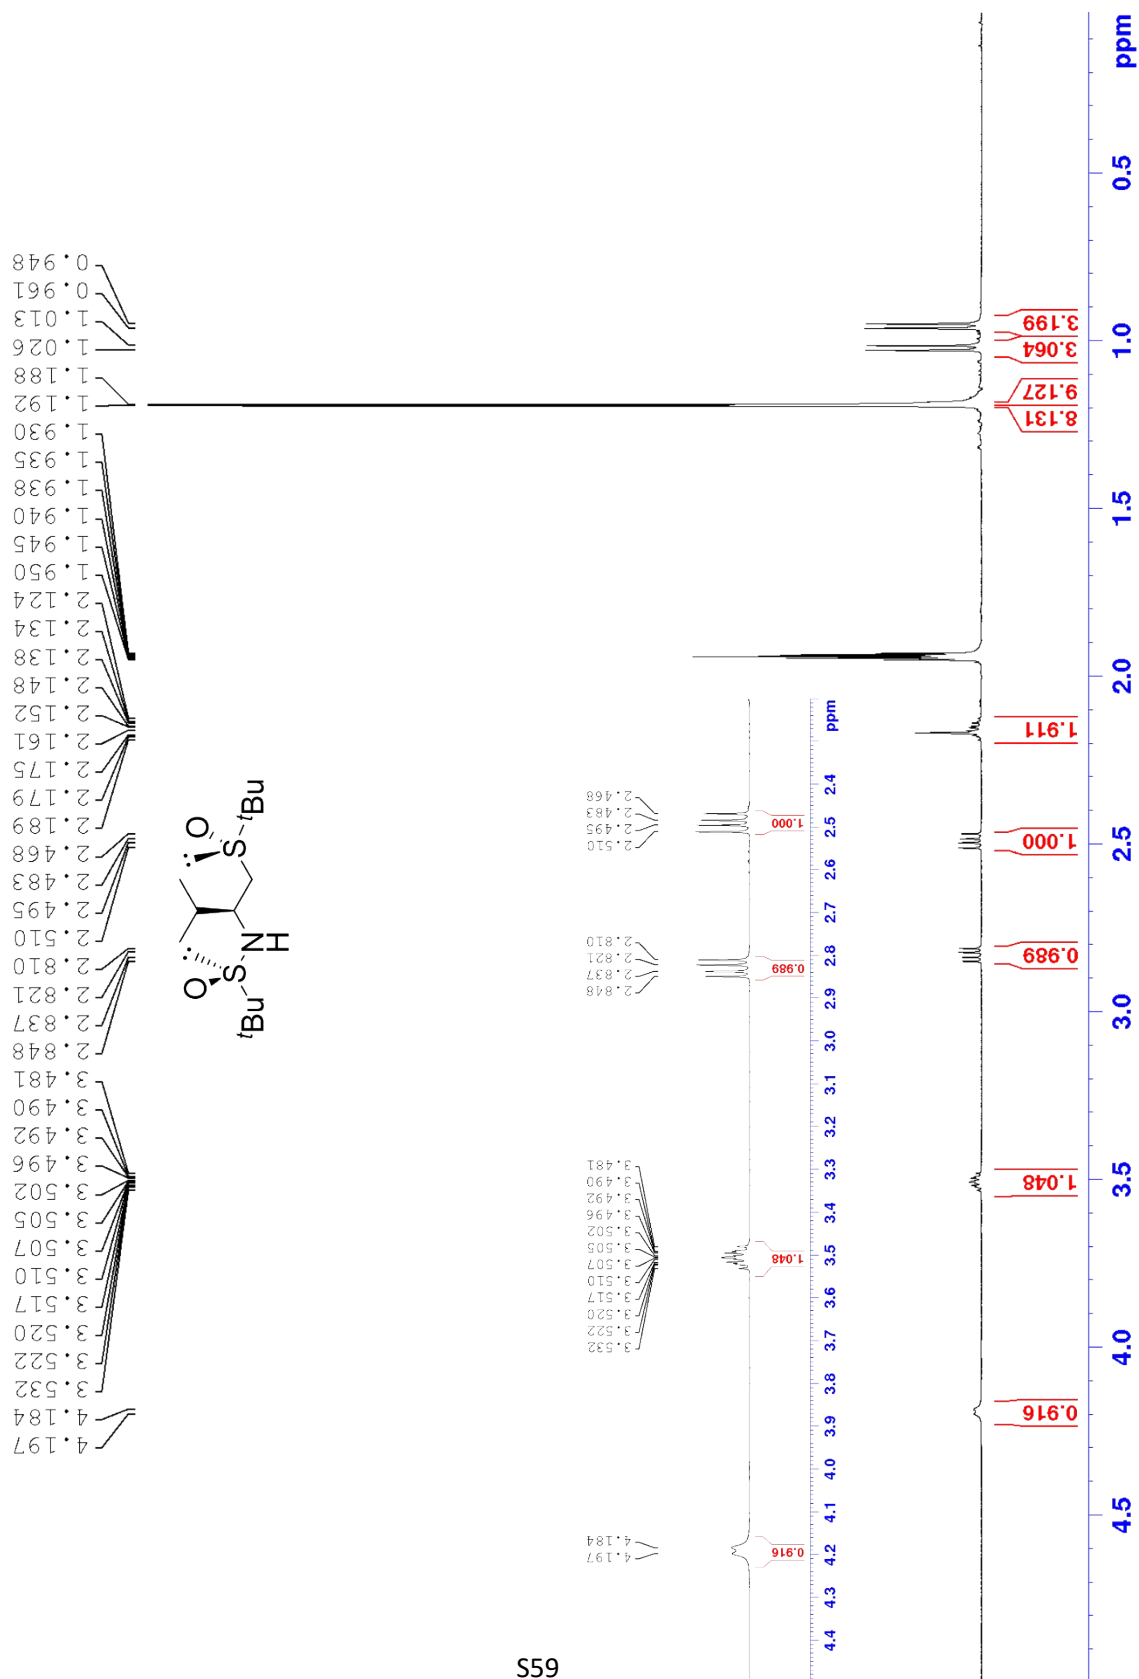

<sup>13</sup>C-NMR (500 MHz, CD<sub>3</sub>CN)

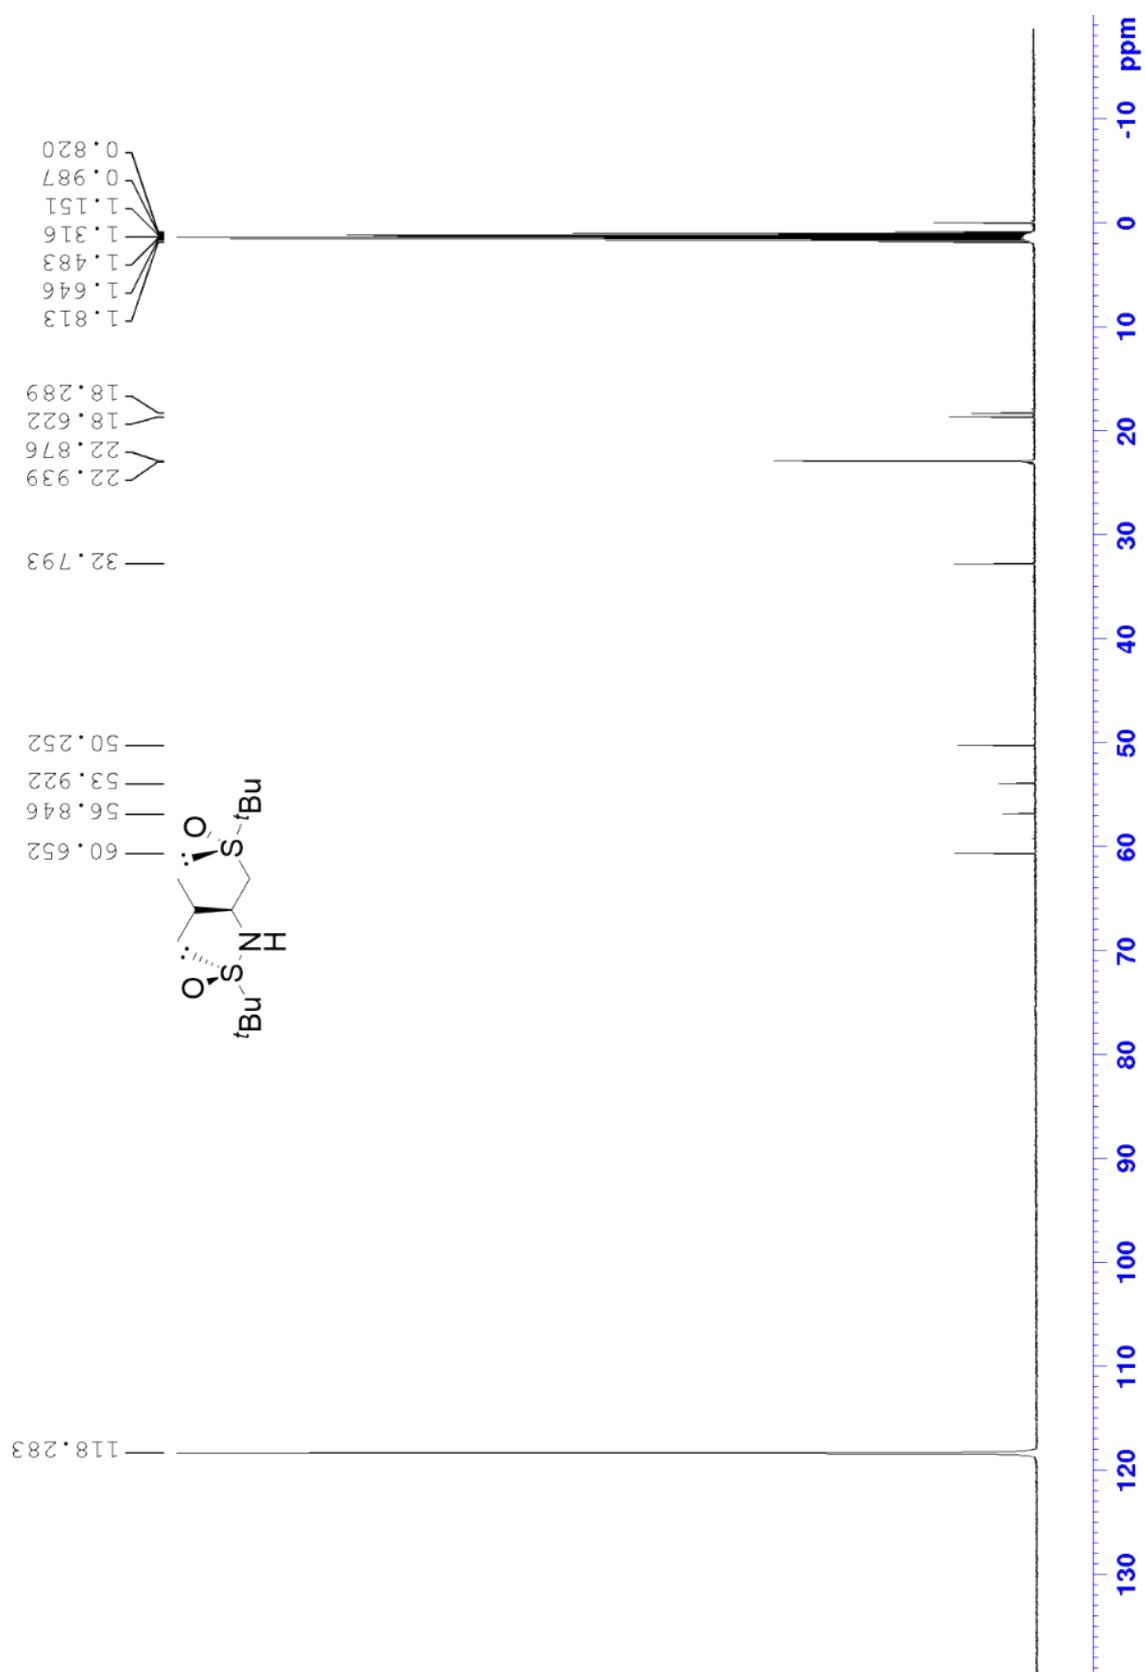

Methyl Tert-butyl sulfone, **20**

$^1\text{H-NMR}$  (500 MHz,  $\text{CDCl}_3$ )

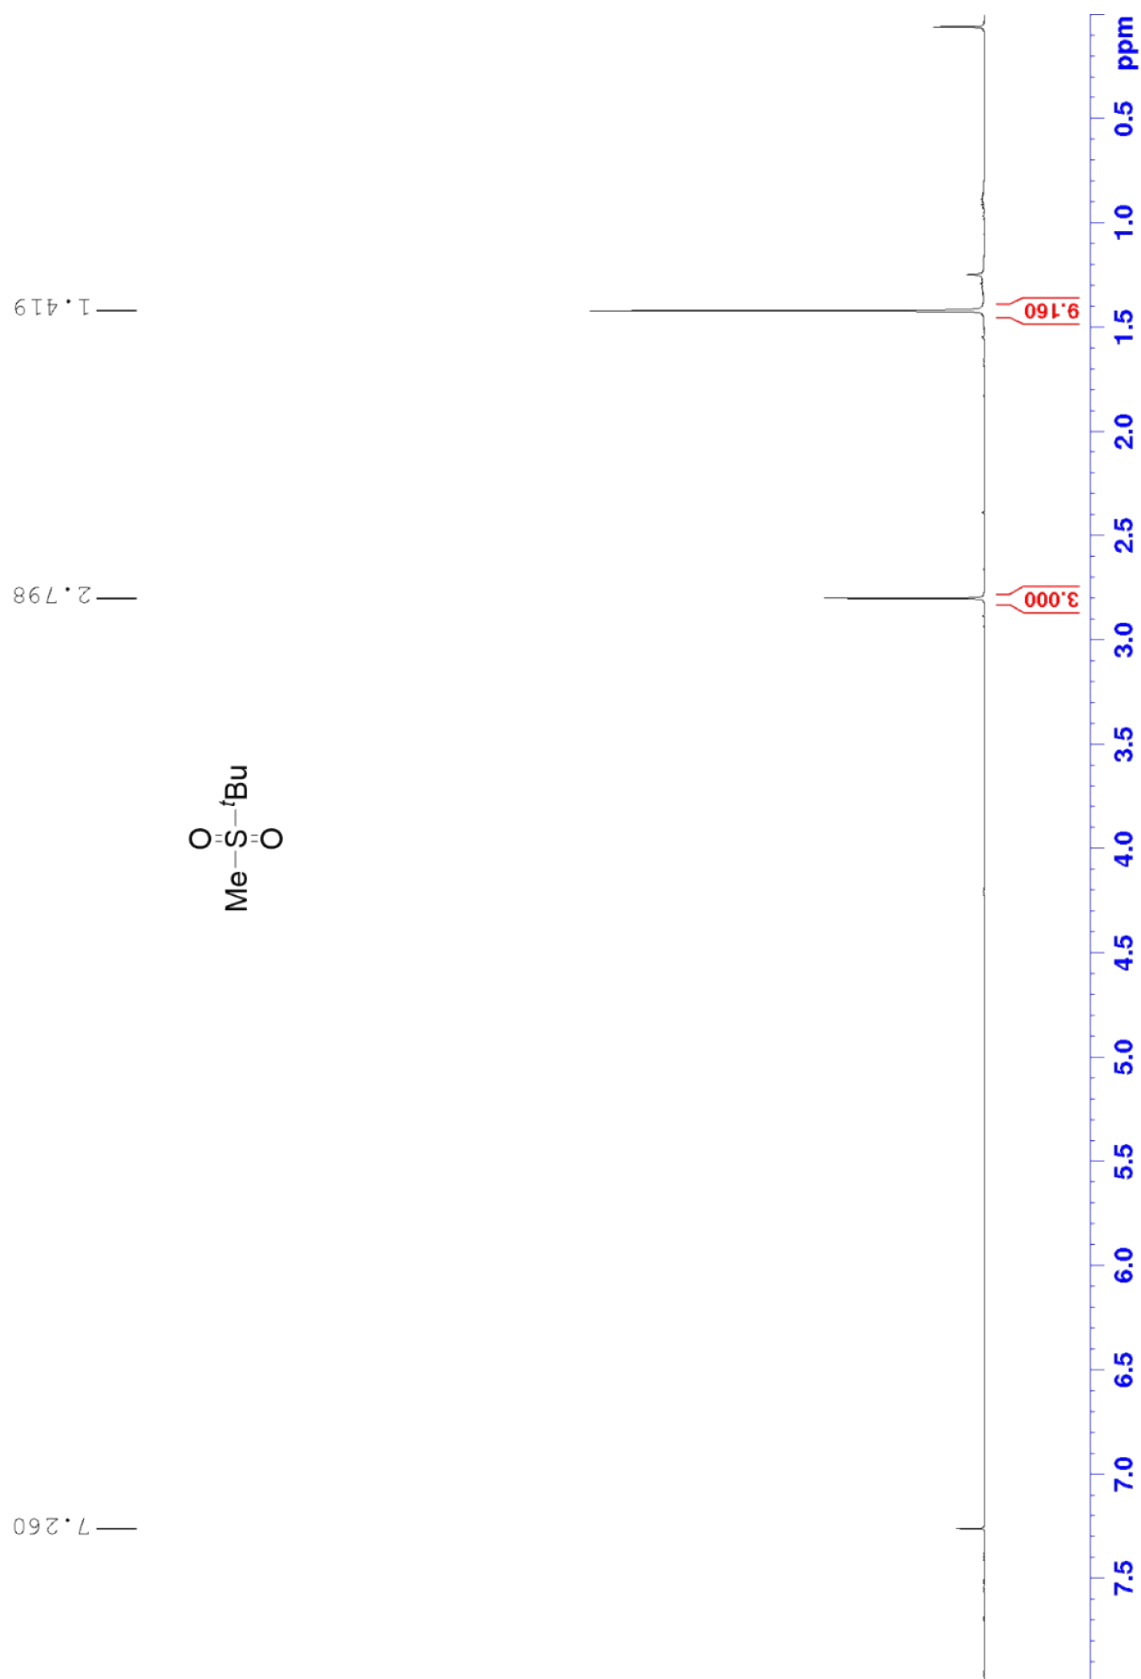

$^{13}\text{C}$ -NMR (500 MHz,  $\text{CDCl}_3$ )

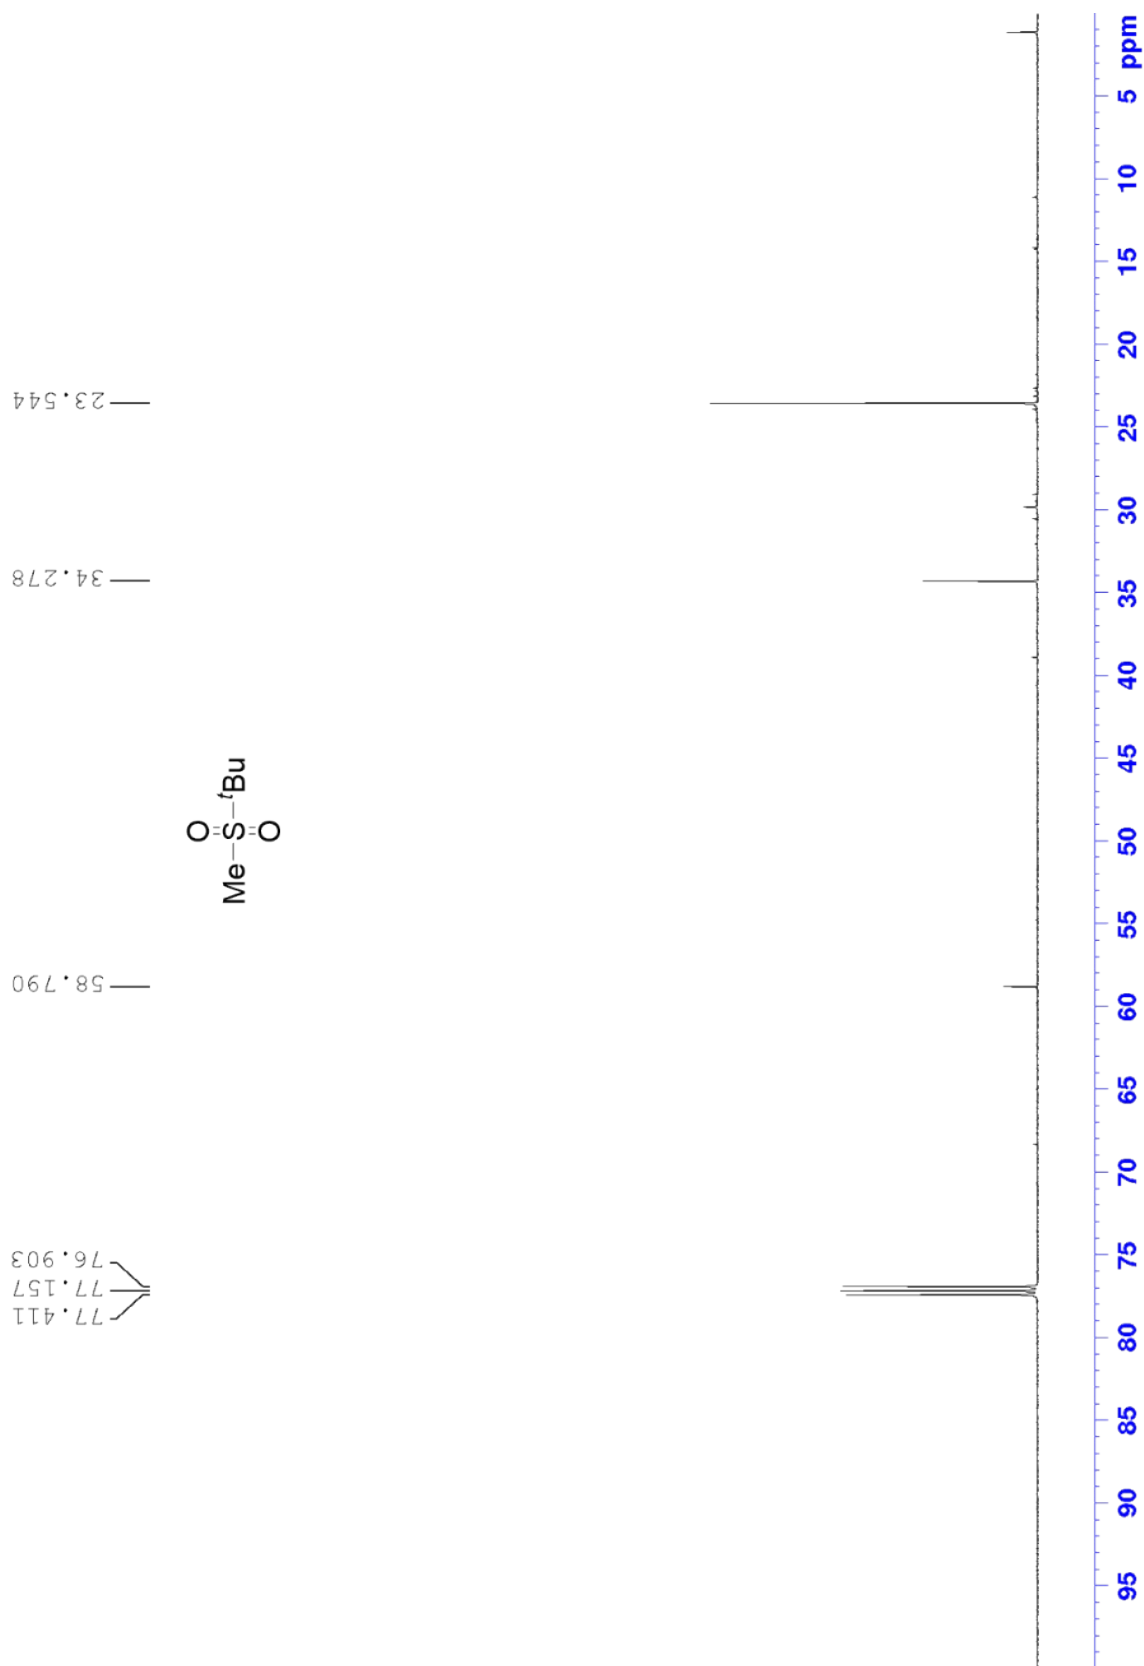

*(R<sub>s</sub>,S<sub>c</sub>)-N-[2-(Tert-butylsulfonyl)-1-(2-naphthyl)ethyl]-2-methyl-2-propanesulfonamide, 21(R<sub>s</sub>,S<sub>c</sub>)*

<sup>1</sup>H-NMR (500 MHz, CD<sub>3</sub>CN)

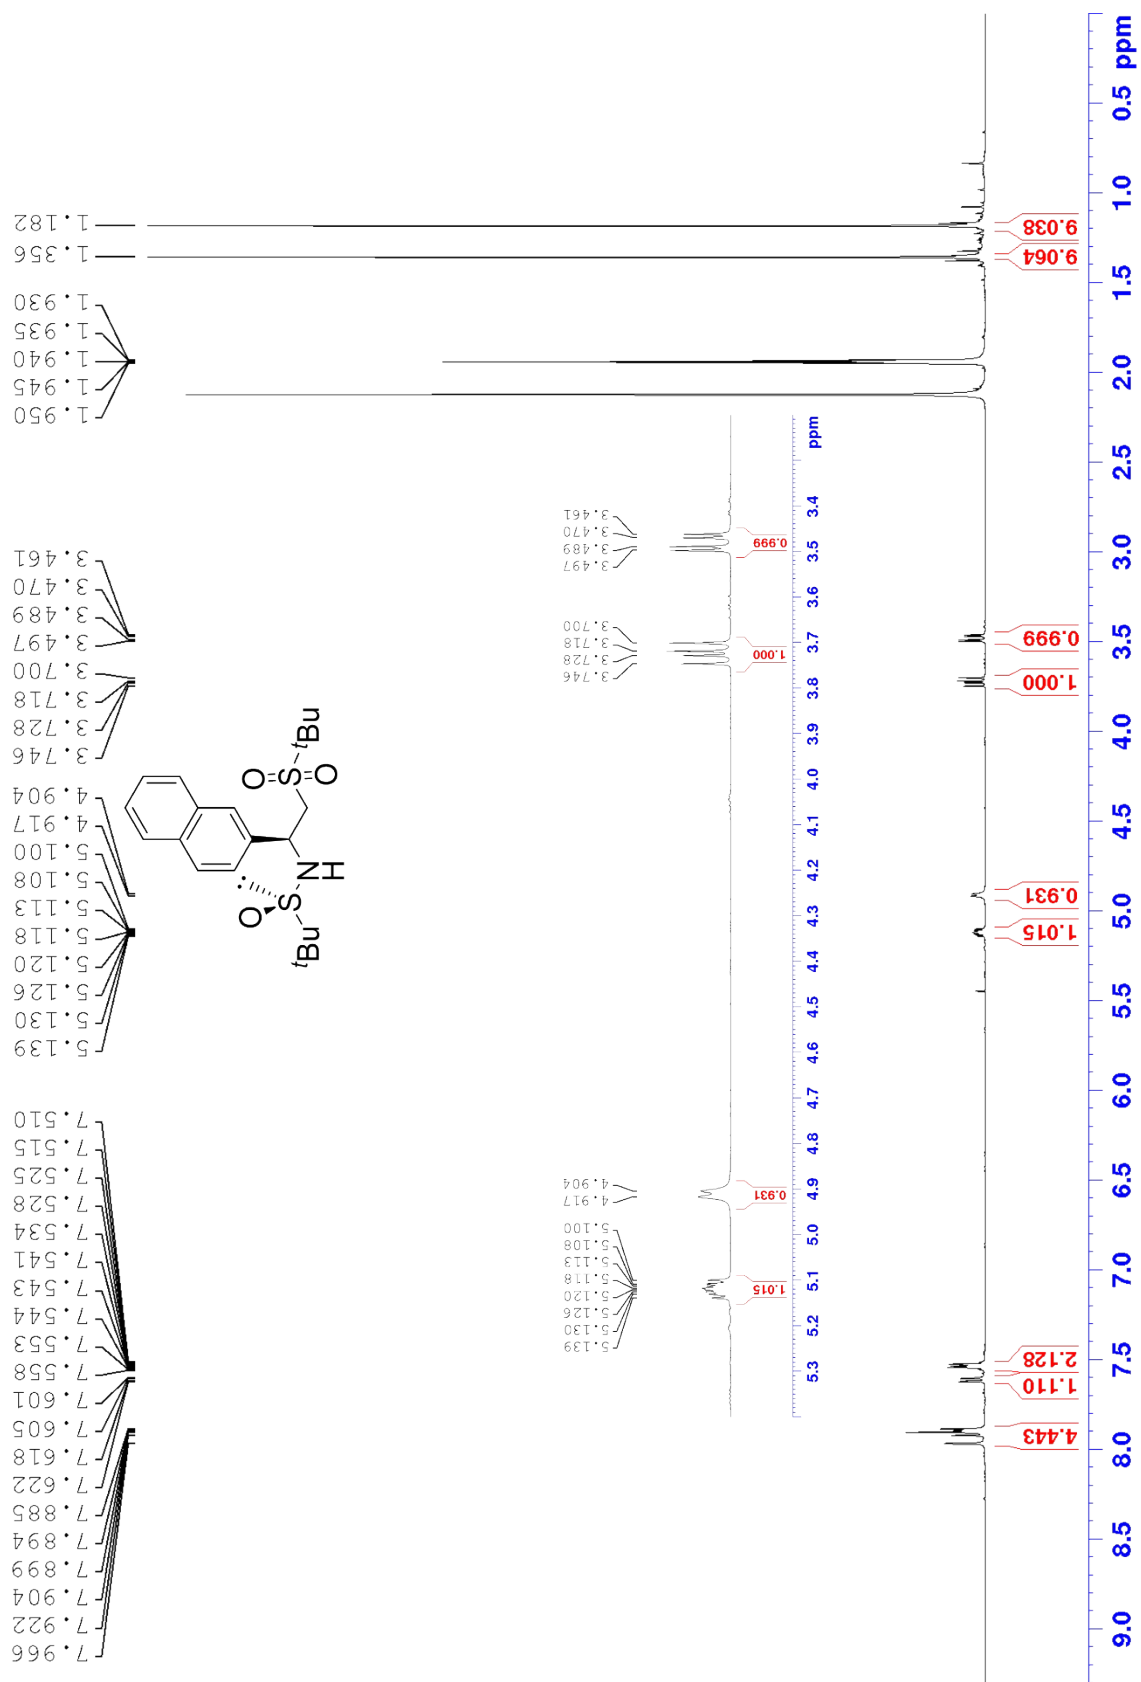

$^{13}\text{C}$ -NMR (500 MHz,  $\text{CD}_3\text{CN}$ )

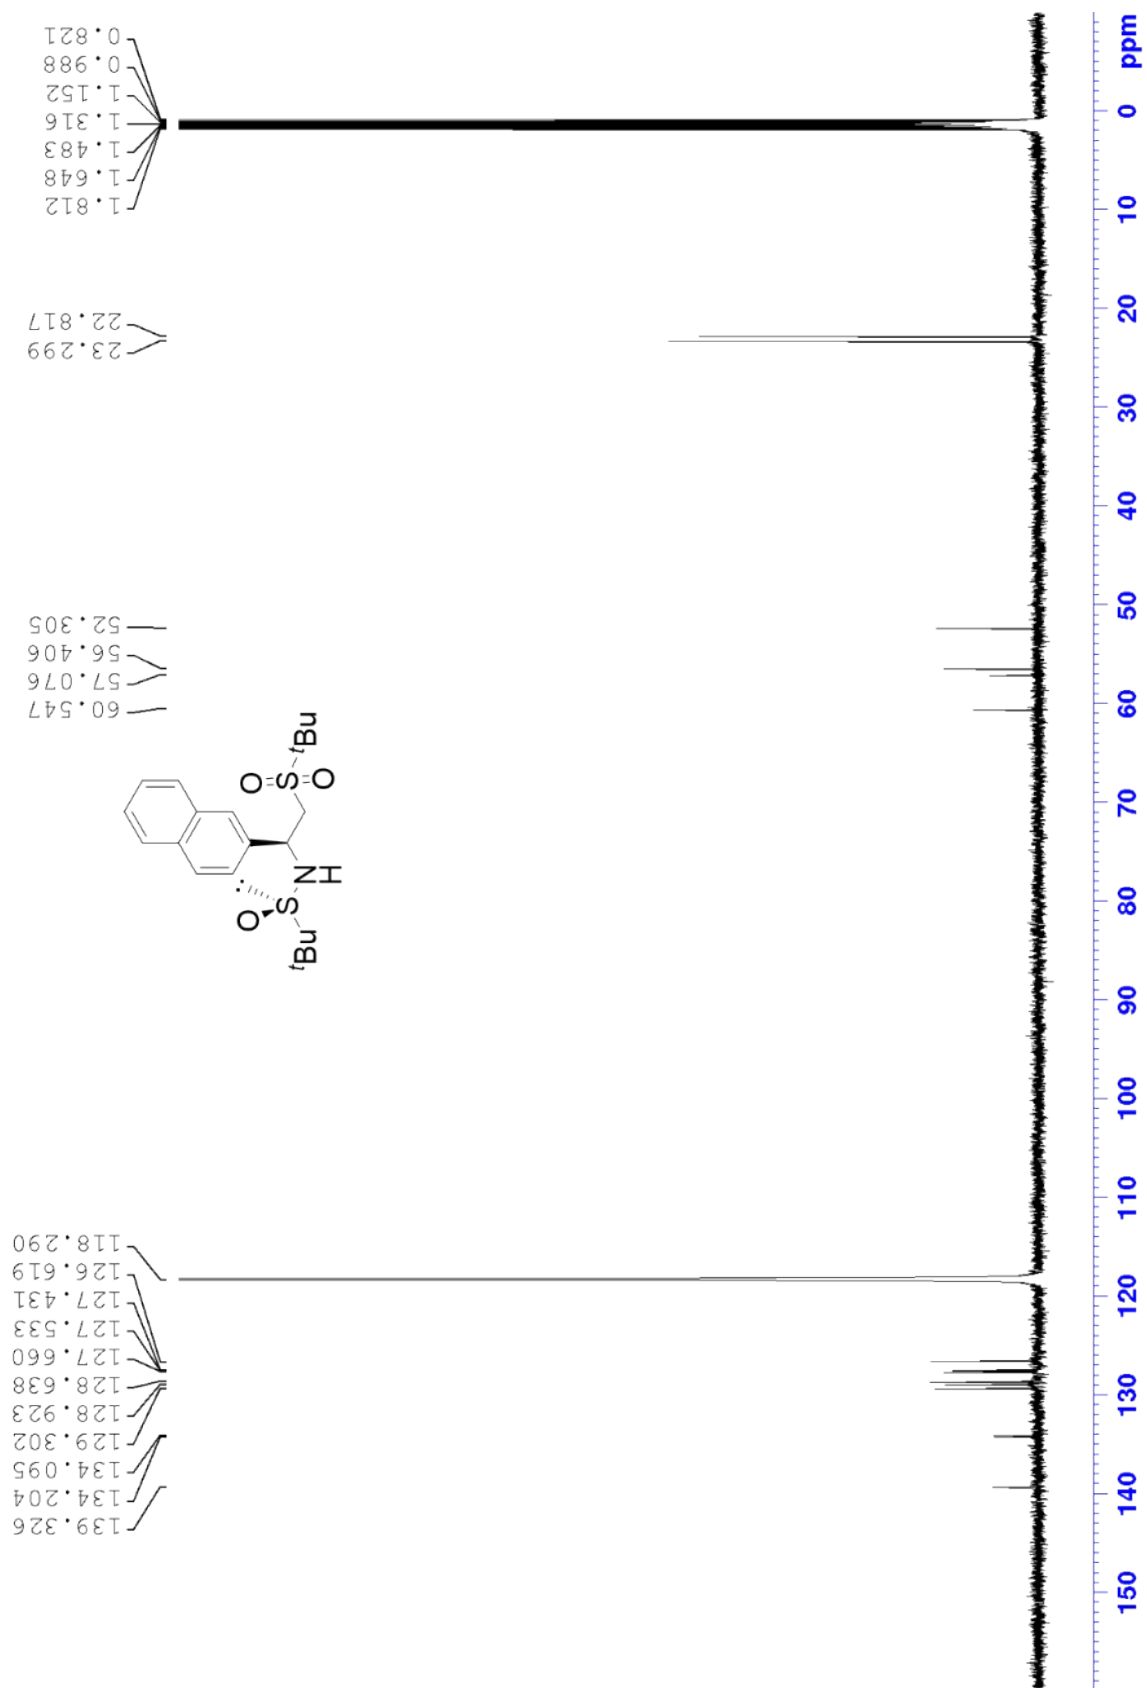





$^{13}\text{C}$ -NMR (500 MHz,  $\text{CD}_3\text{CN}$ )

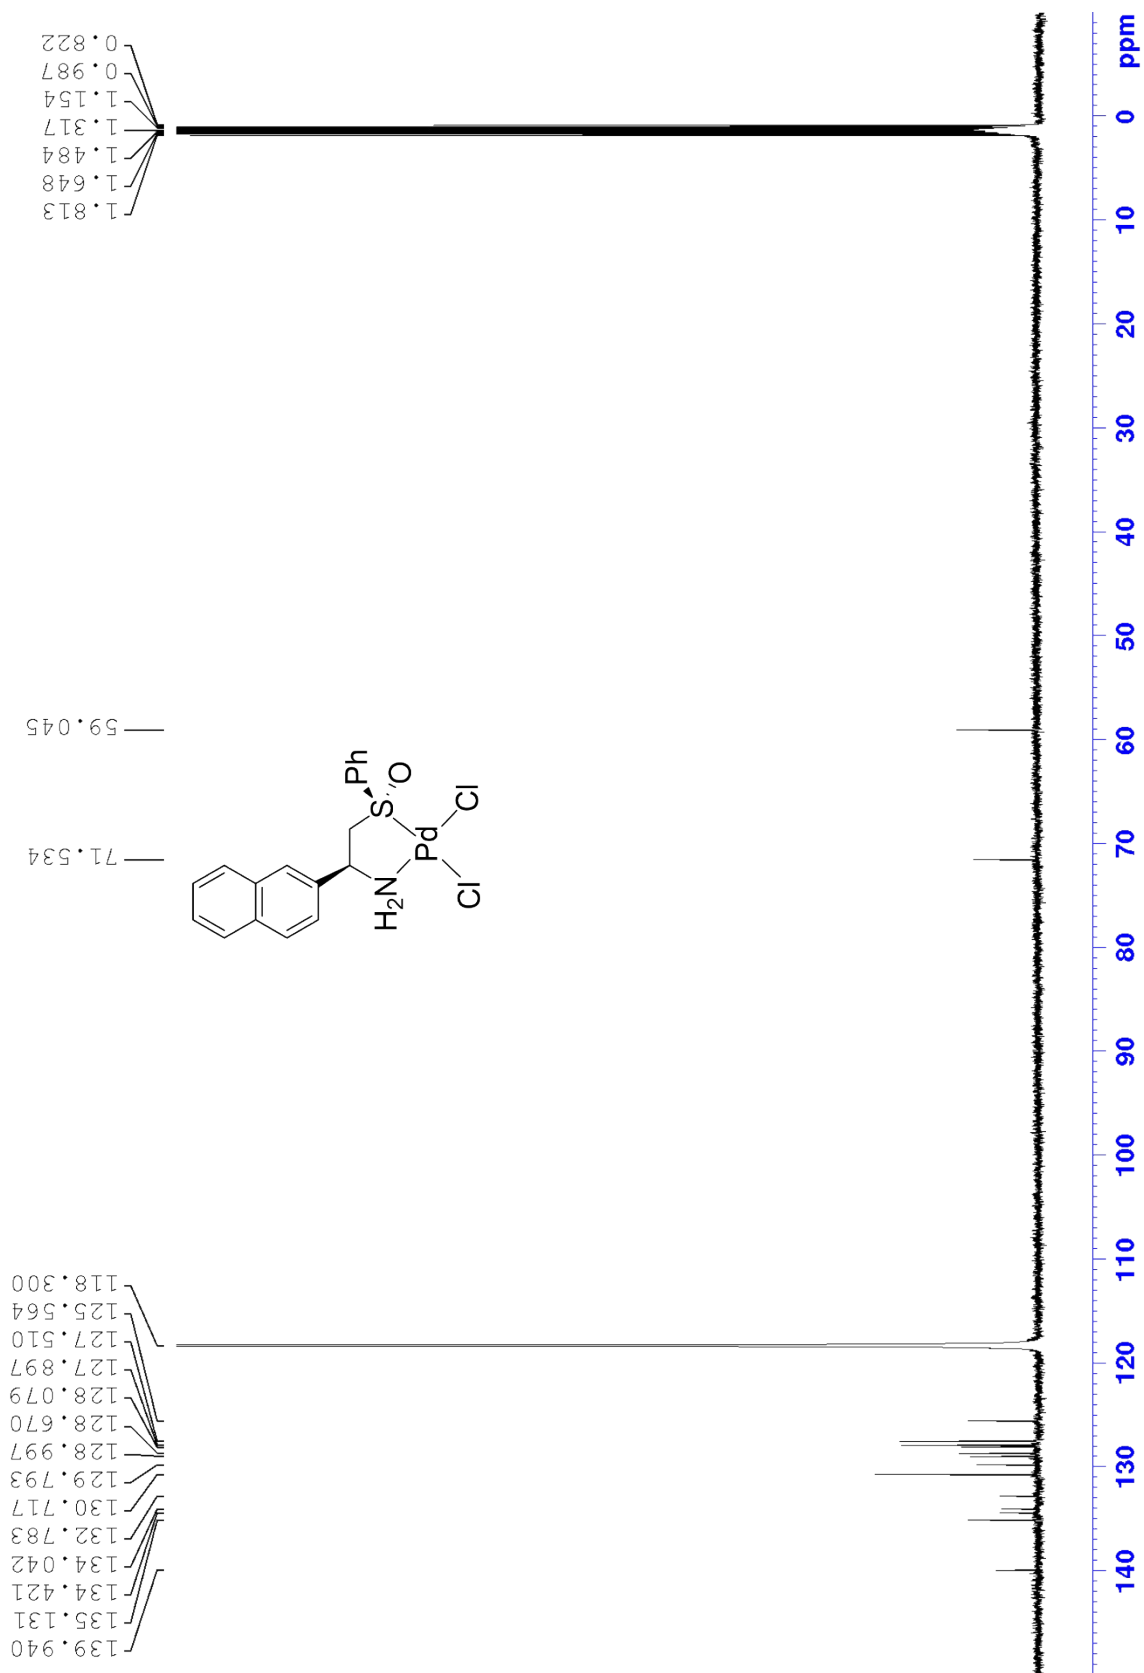

*cis*-Dichloro[(*S<sub>C</sub>R<sub>S</sub>*)-1-(2-Naphthyl)-2-(phenylsulfinyl)ethylamine]palladium (II), **13**(*S<sub>C</sub>R<sub>S</sub>*)

<sup>1</sup>H-NMR (500 MHz, CD<sub>3</sub>CN)

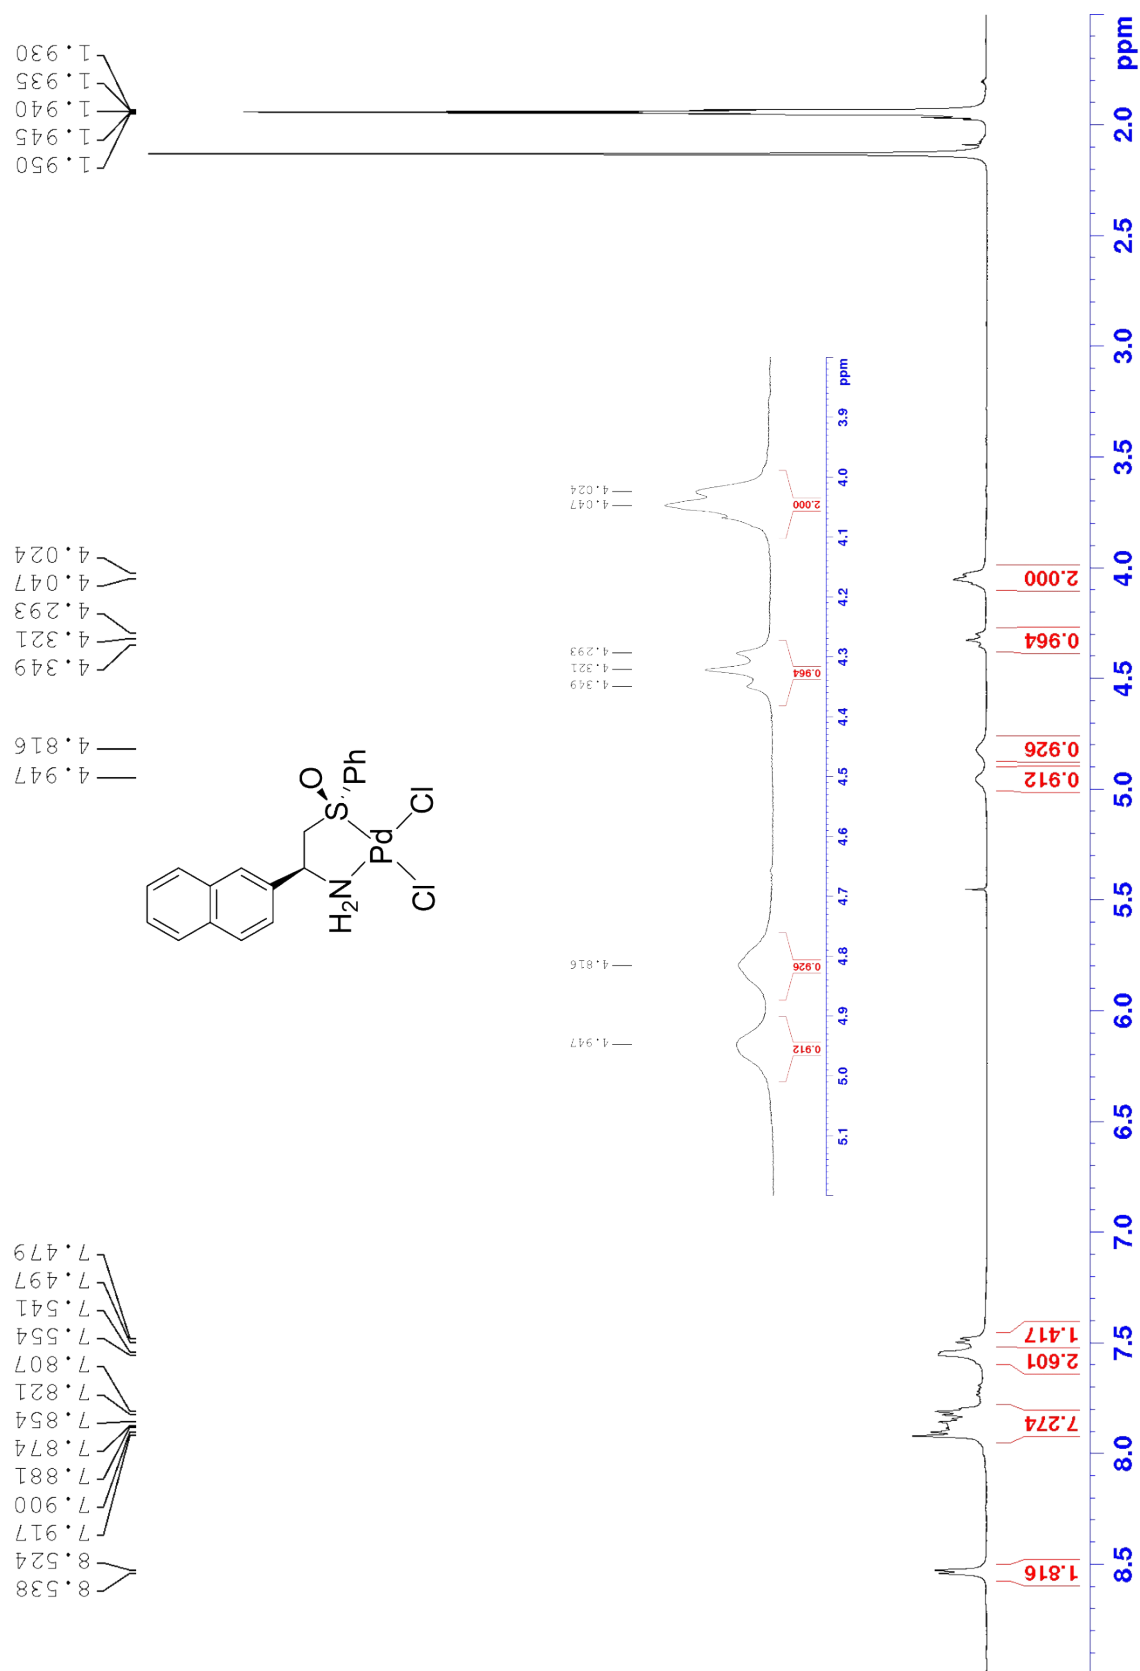

$^{13}\text{C}$ -NMR (500 MHz,  $\text{CD}_3\text{CN}$ )

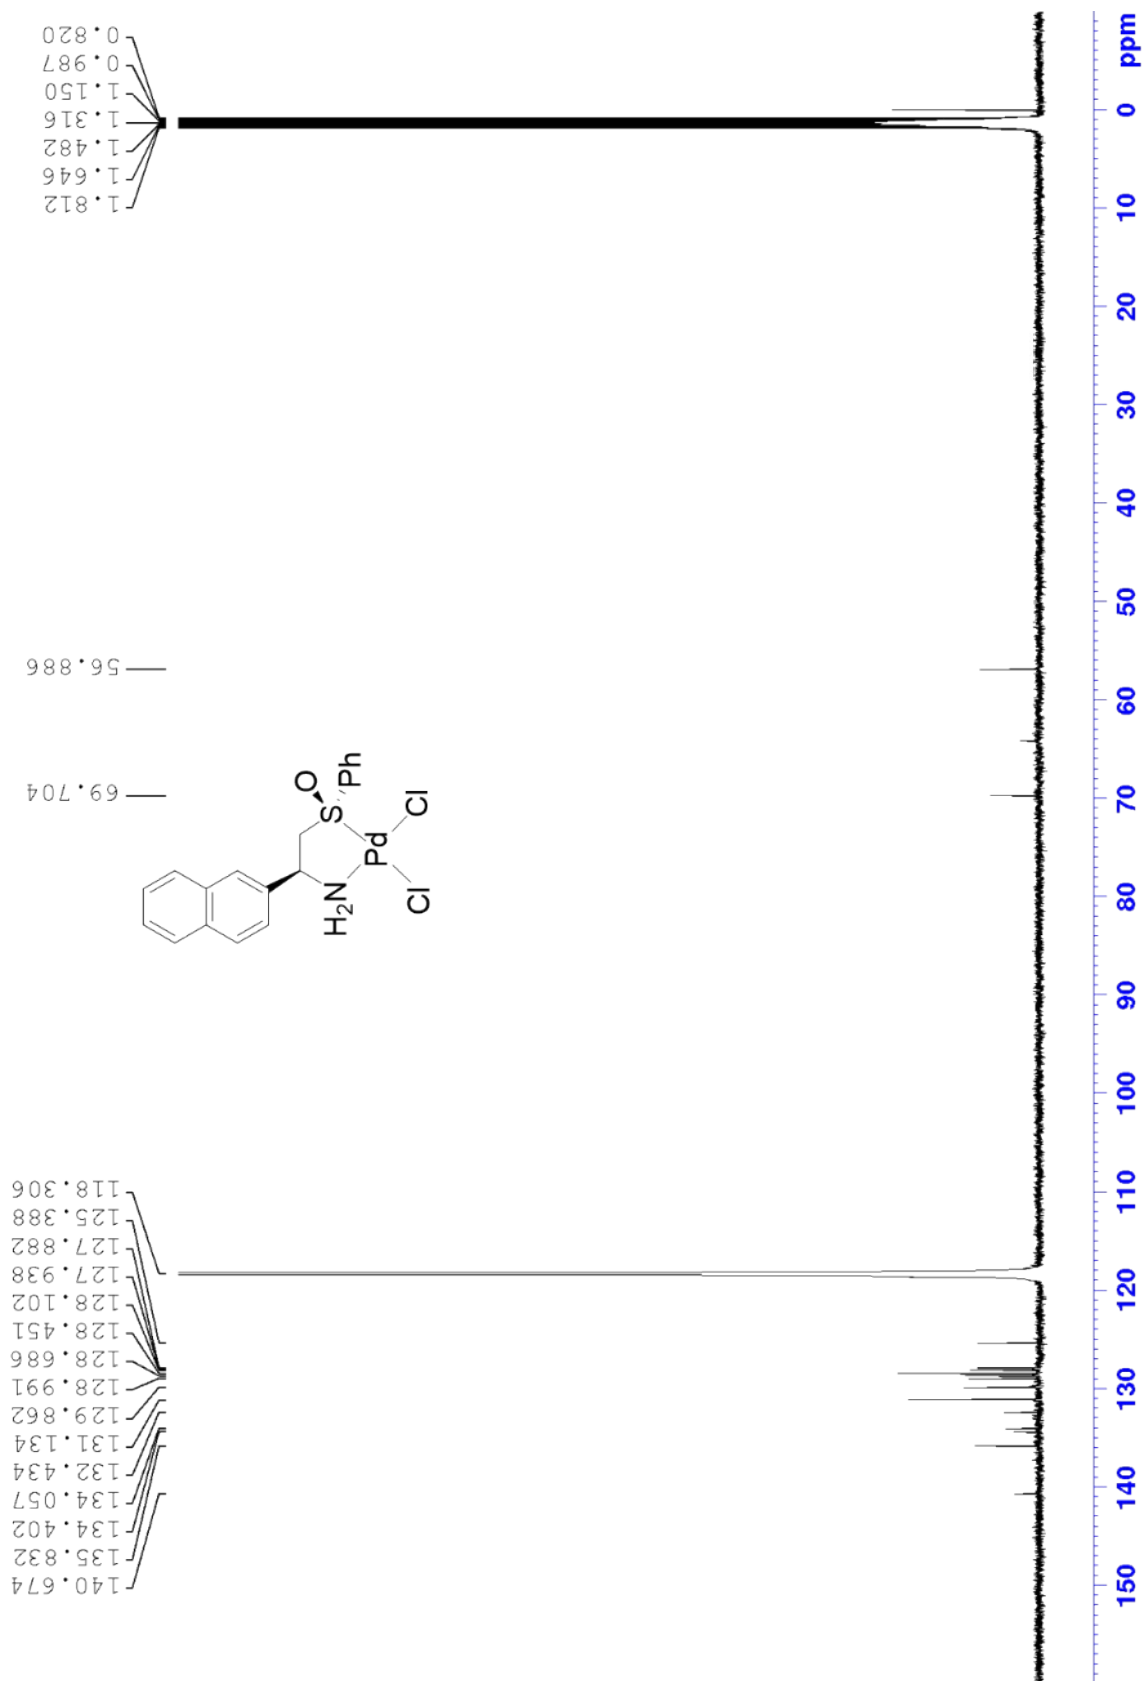

*cis*-Dichloro[(*S<sub>C</sub>S<sub>S</sub>*)-1-(Phenyl)-2-(phenylsulfinyl)ethylamine]palladium (II), **14**(*S<sub>C</sub>S<sub>S</sub>*)

<sup>1</sup>H-NMR (500 MHz, CD<sub>3</sub>CN)

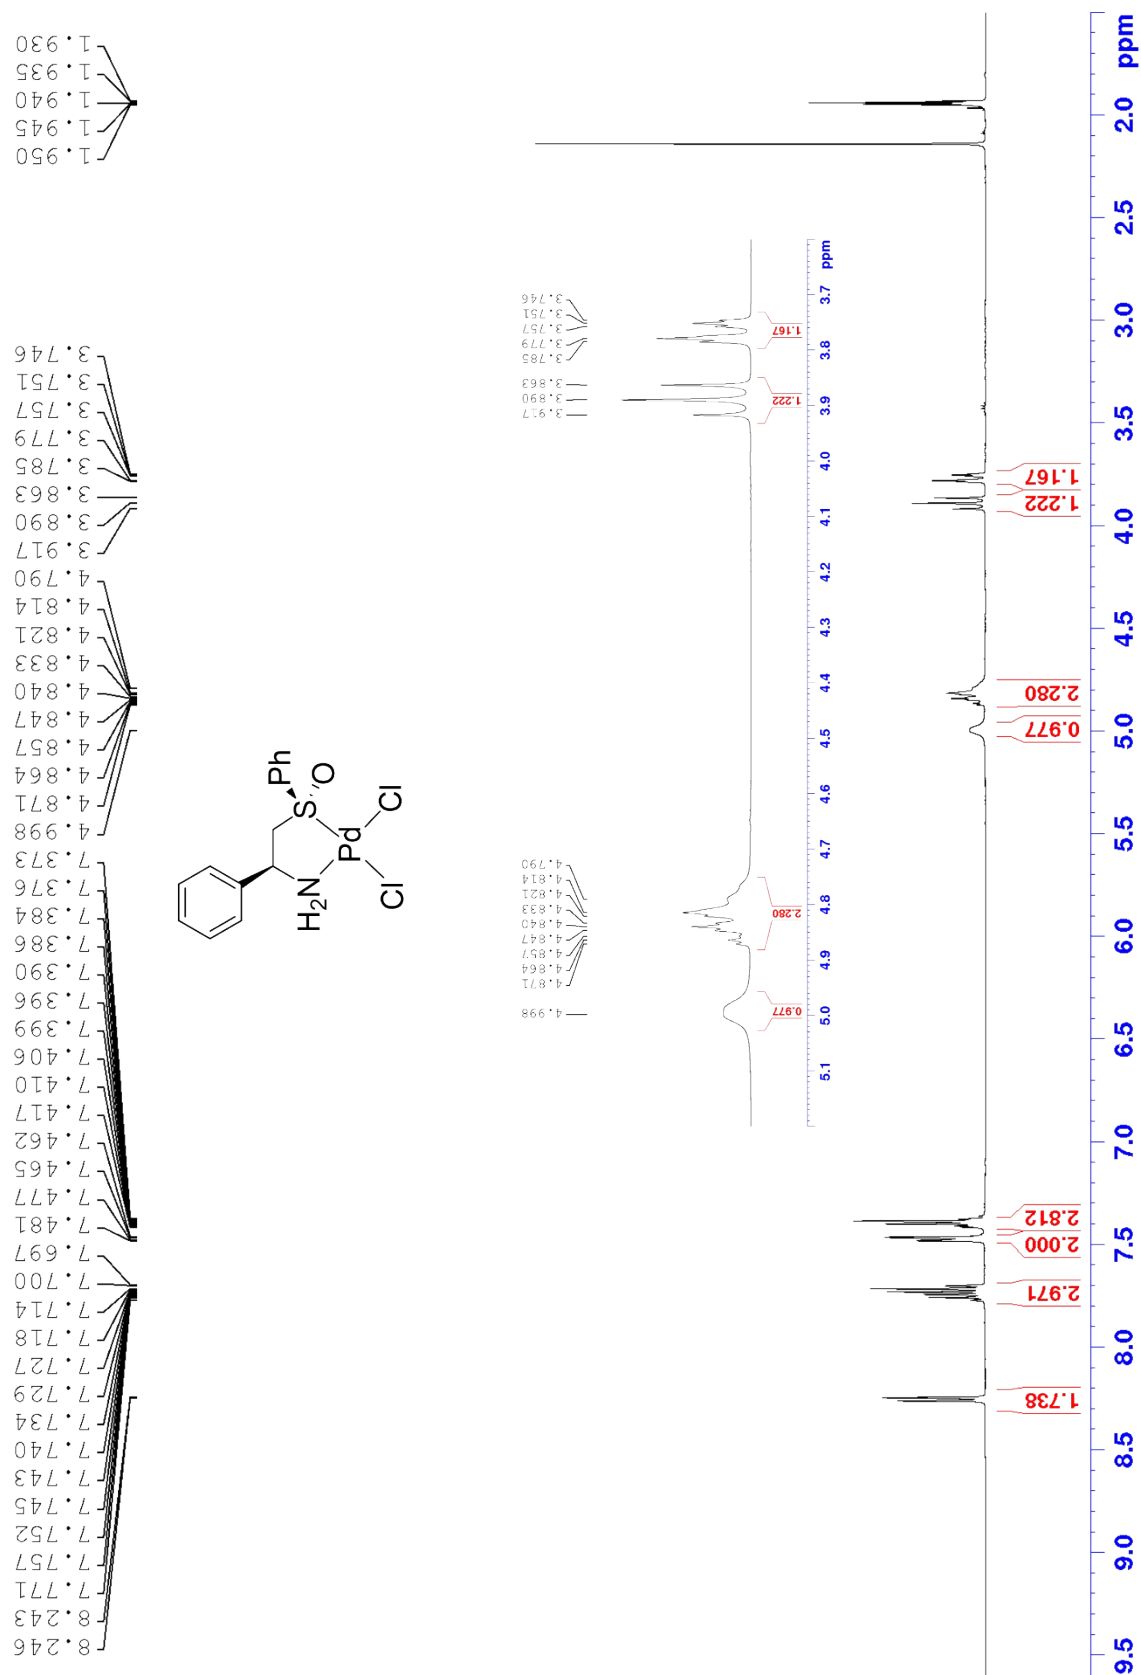

$^{13}\text{C}$ -NMR (500 MHz,  $\text{CD}_3\text{CN}$ )

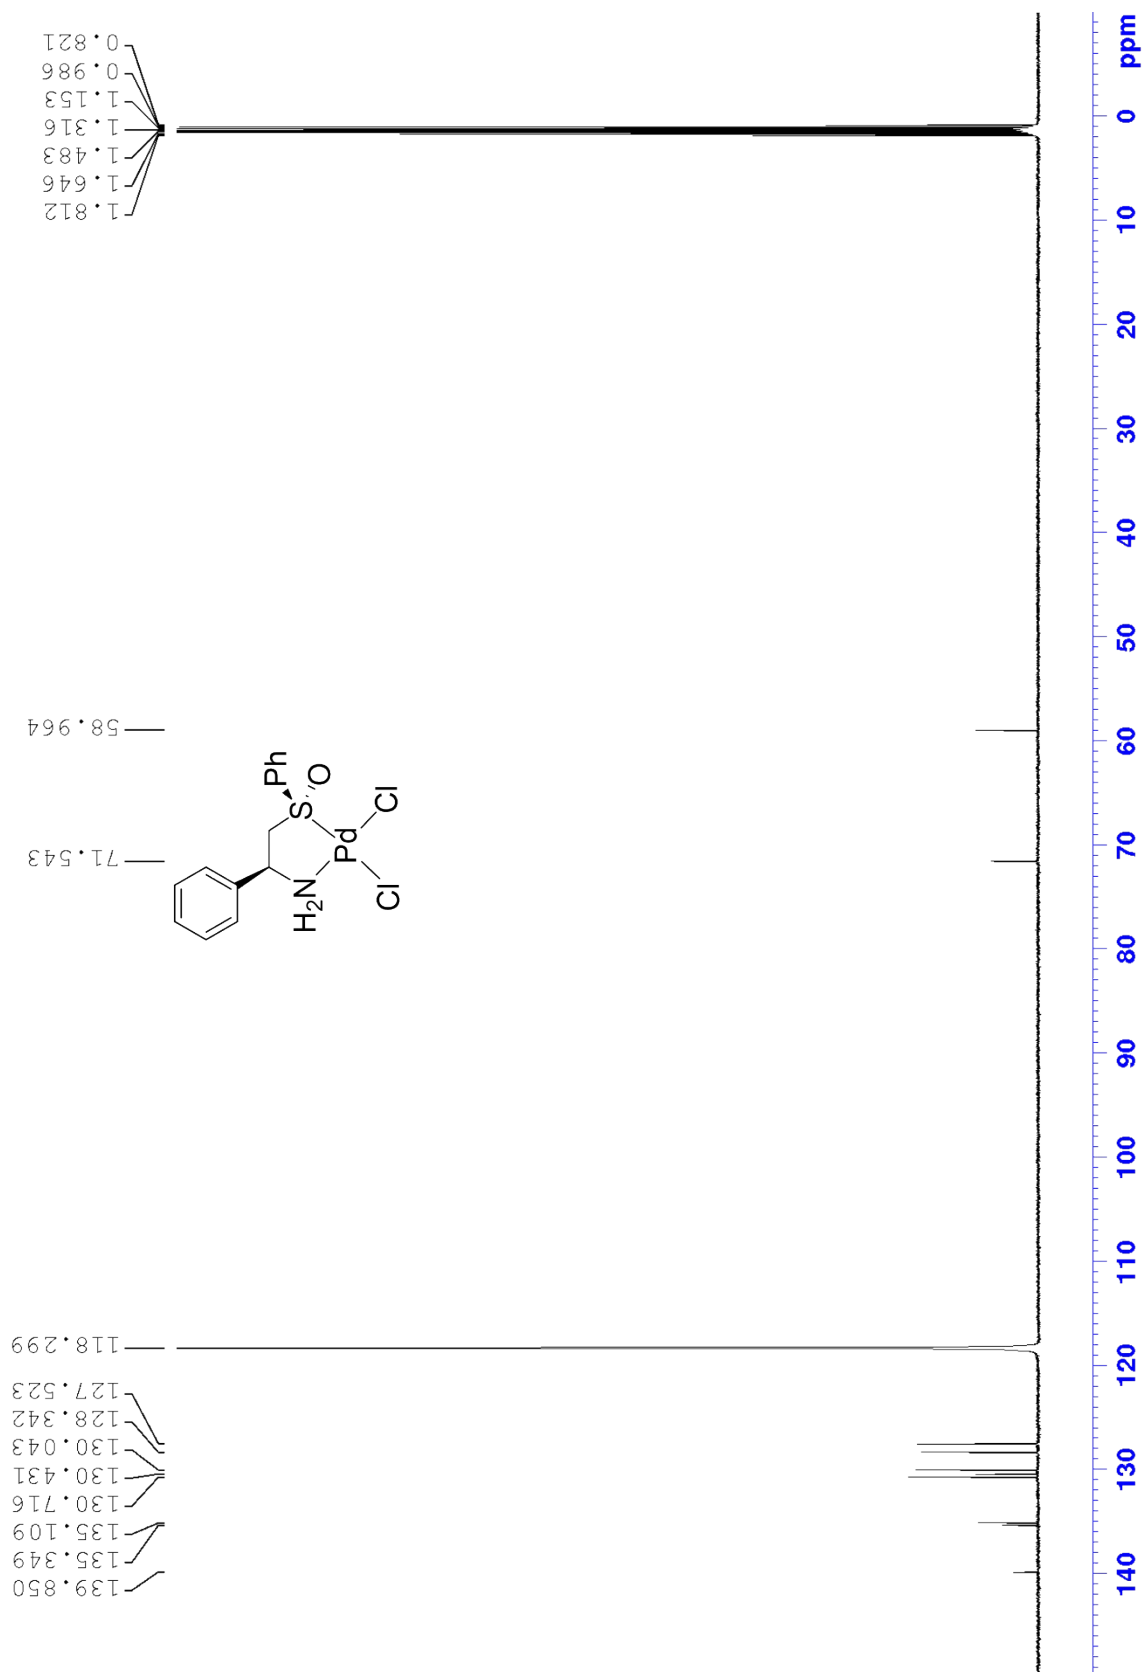

*cis*-Dichloro[(*S<sub>C</sub>R<sub>S</sub>*)-1-(Phenyl)-2-(phenylsulfinyl)ethylamine]palladium (II), **14**(*S<sub>C</sub>R<sub>S</sub>*)

<sup>1</sup>H-NMR (500 MHz, CD<sub>3</sub>CN)

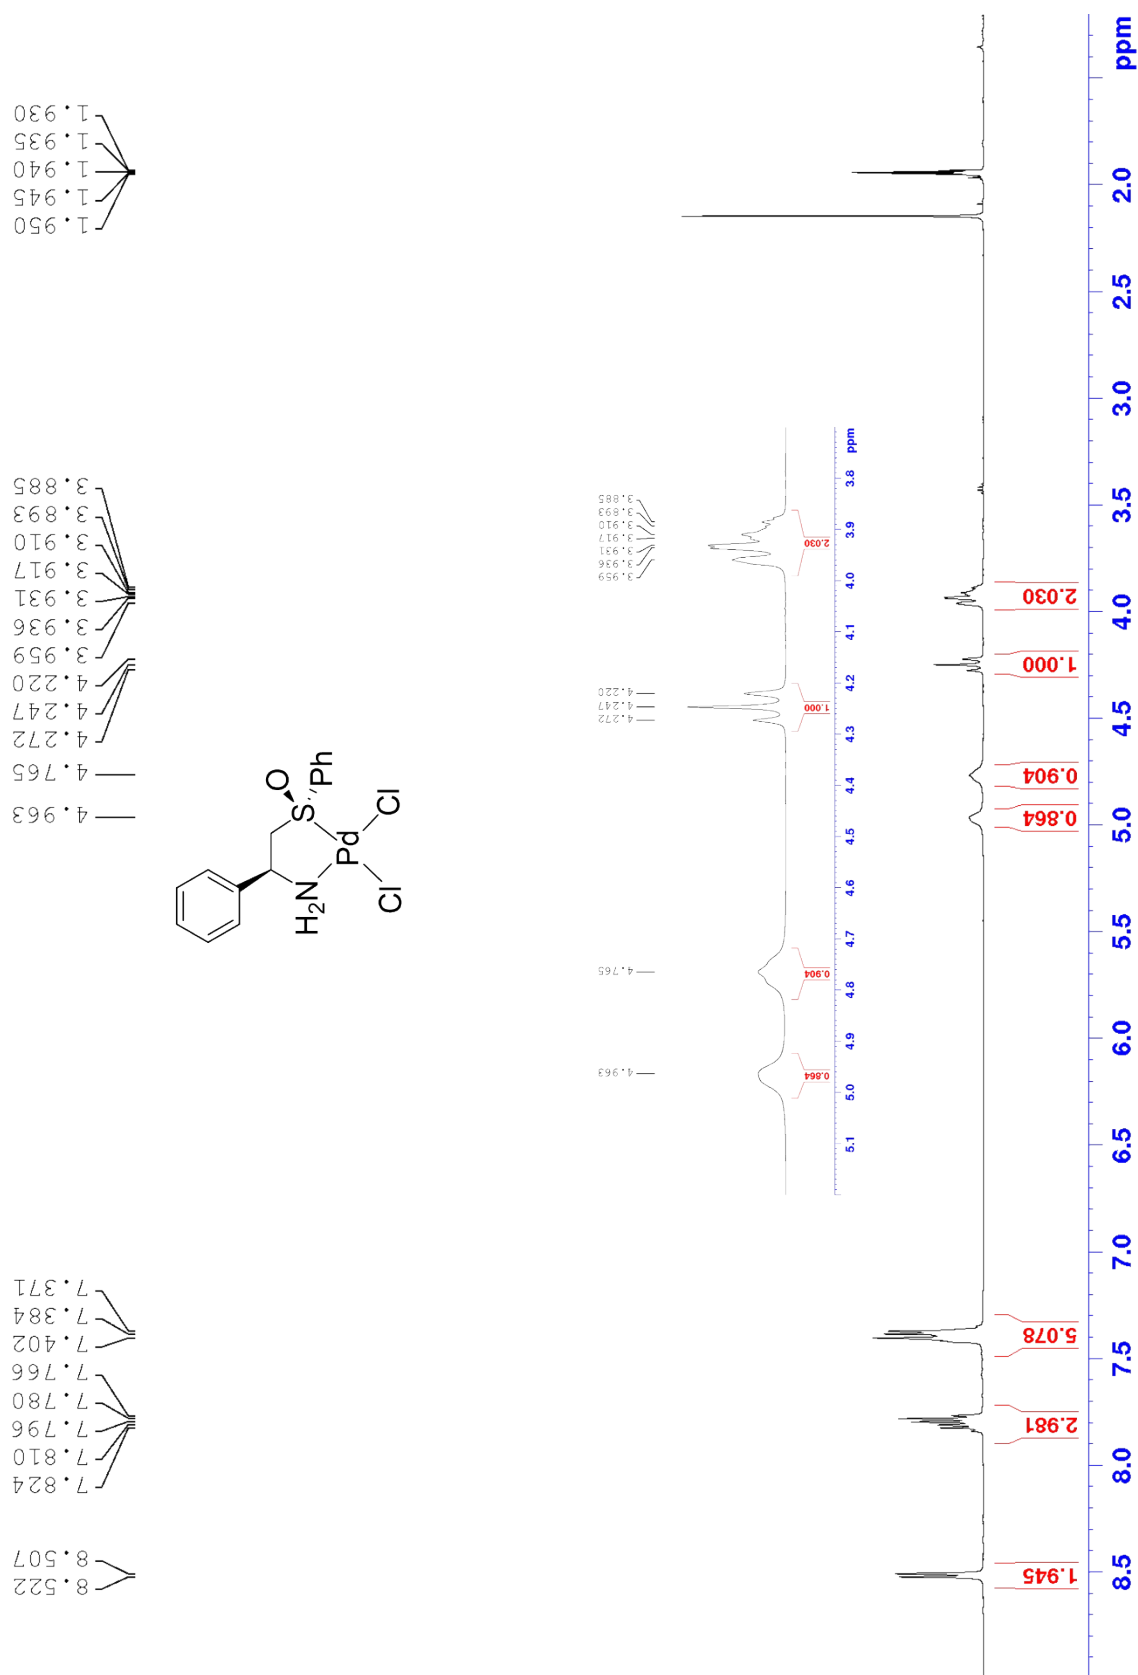

$^{13}\text{C}$ -NMR (500 MHz,  $\text{CD}_3\text{CN}$ )

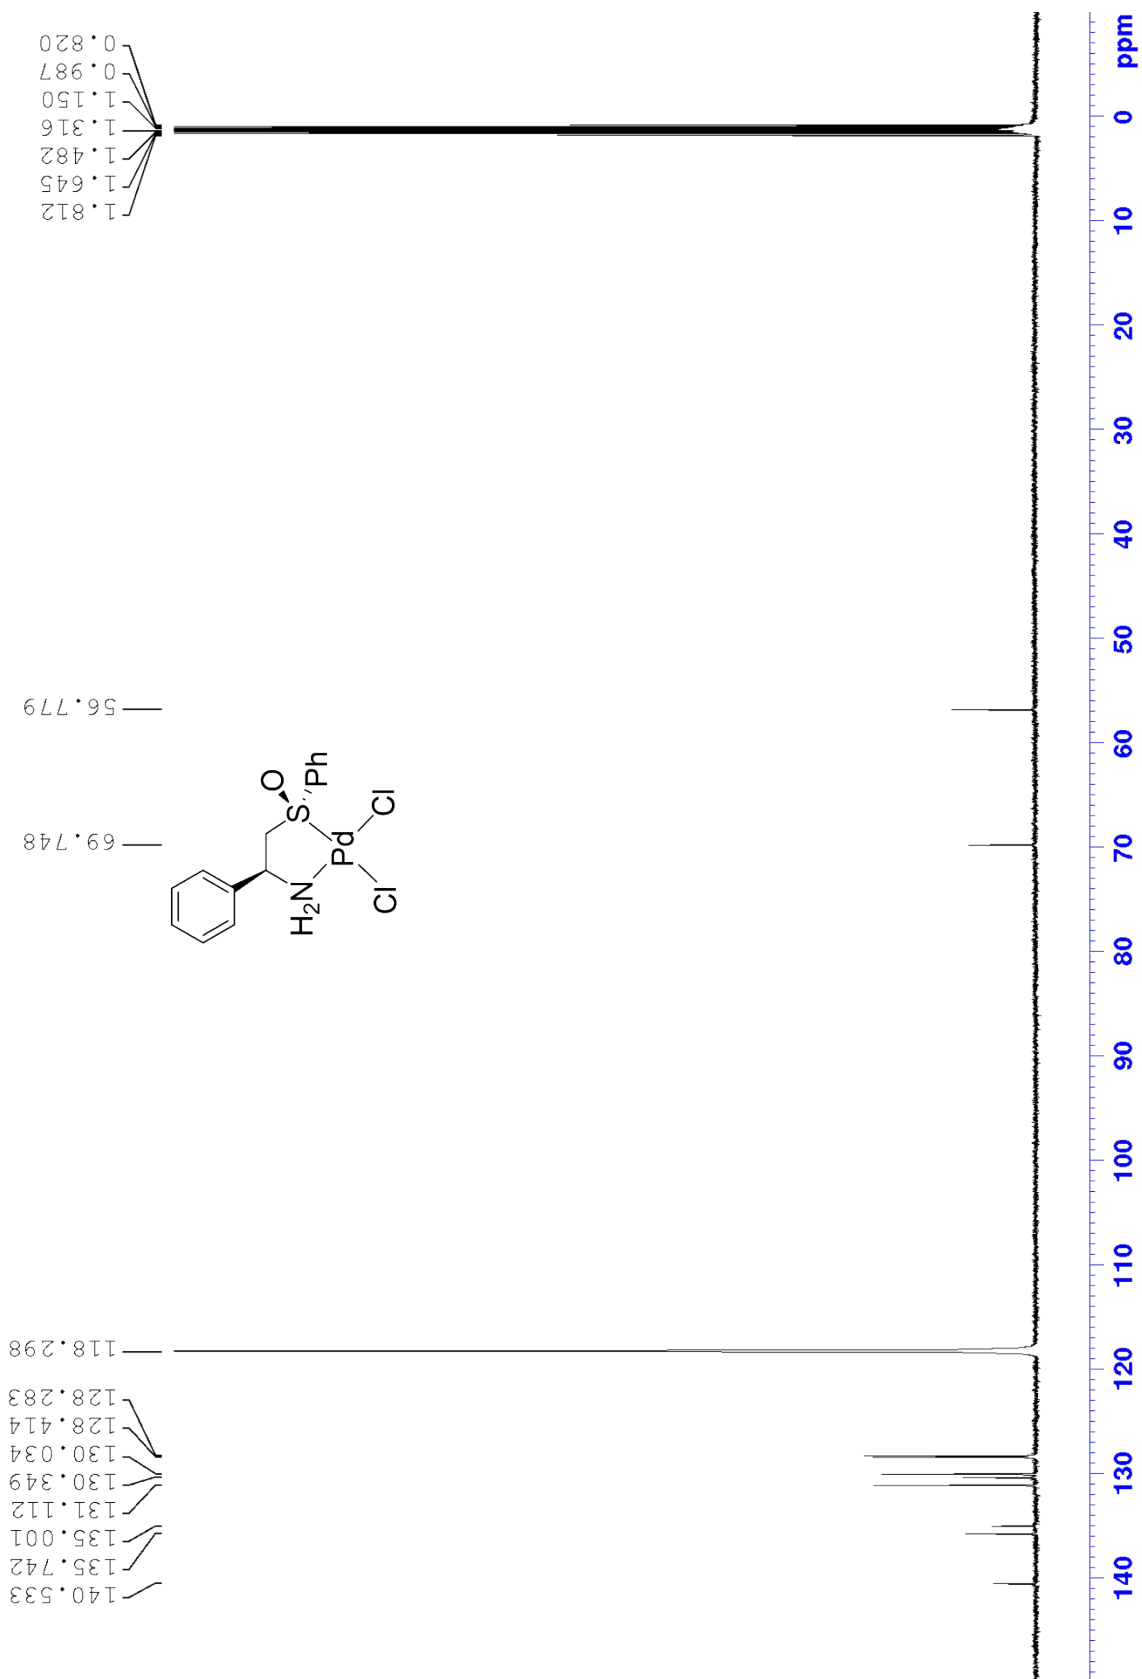



*cis*-Dichloro[(*S<sub>C</sub>S<sub>S</sub>*)-3-methyl-1-(phenylsulfinyl)-2-butylamine]palladium (II), **15**(*S<sub>C</sub>S<sub>S</sub>*)

<sup>1</sup>H-NMR (500 MHz, CD<sub>3</sub>CN)

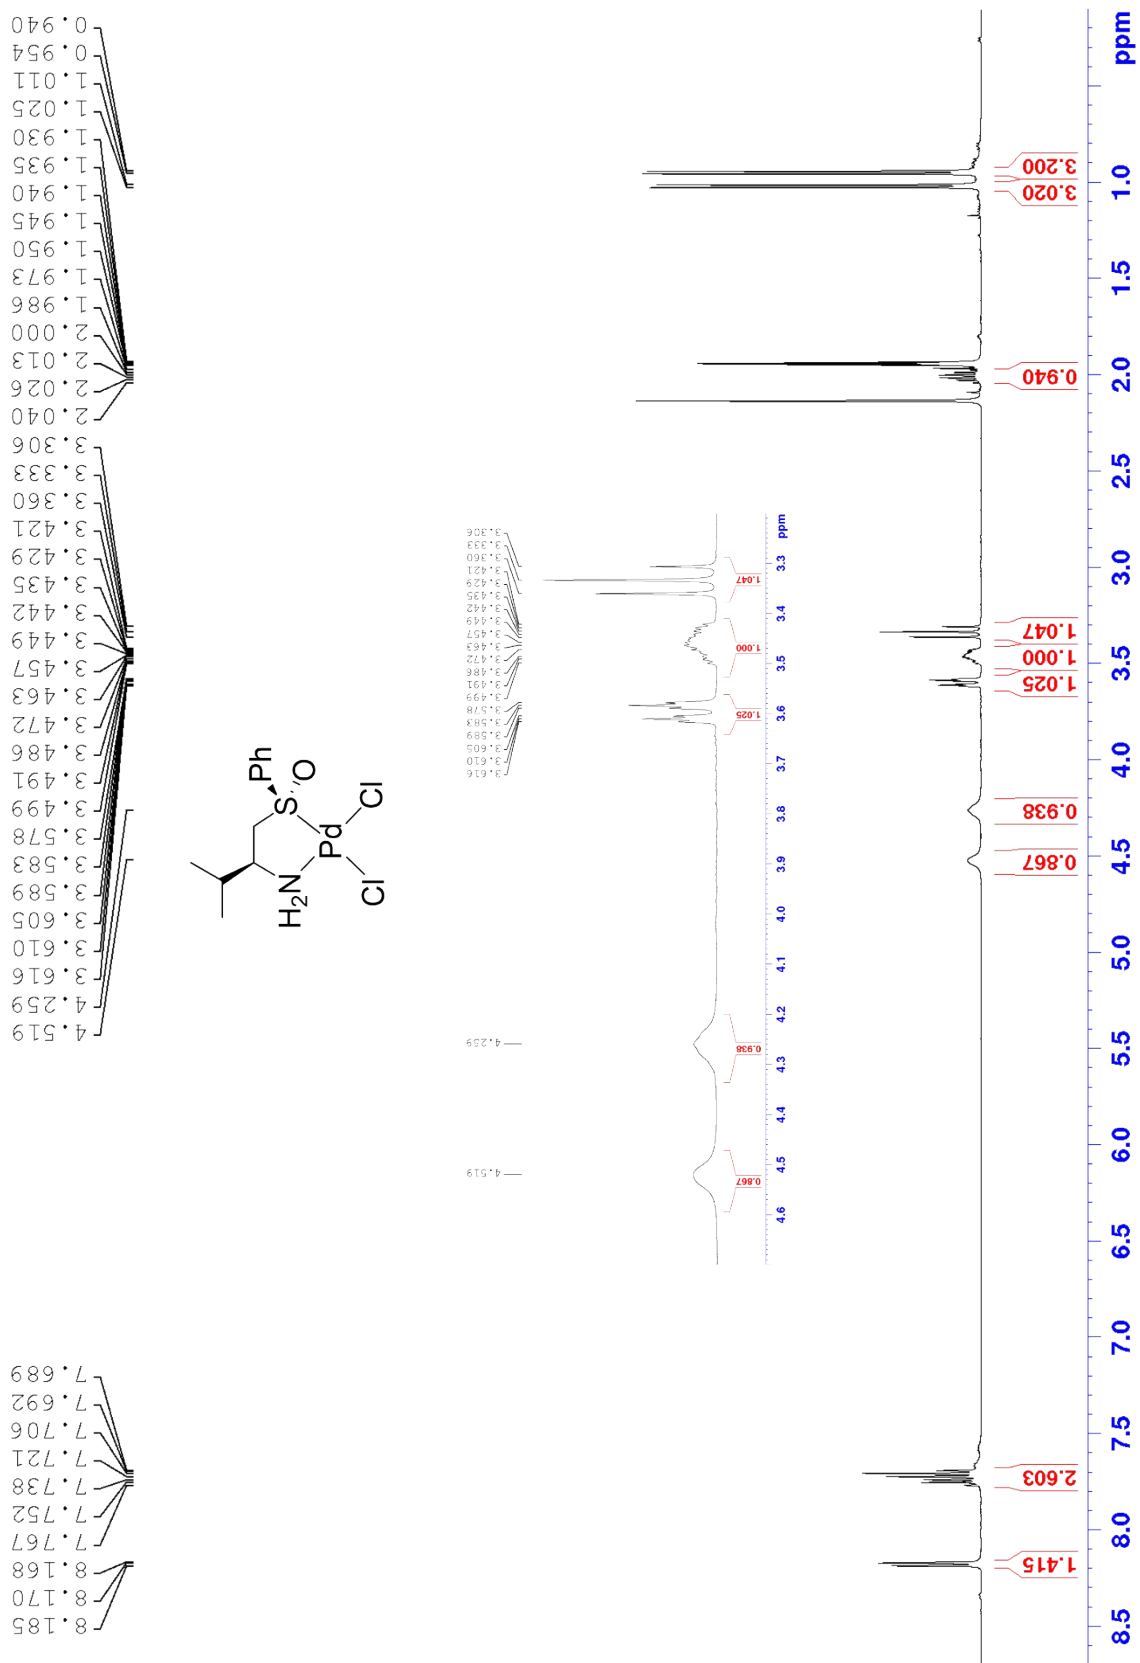

$^{13}\text{C}$ -NMR (500 MHz,  $\text{CD}_3\text{CN}$ )

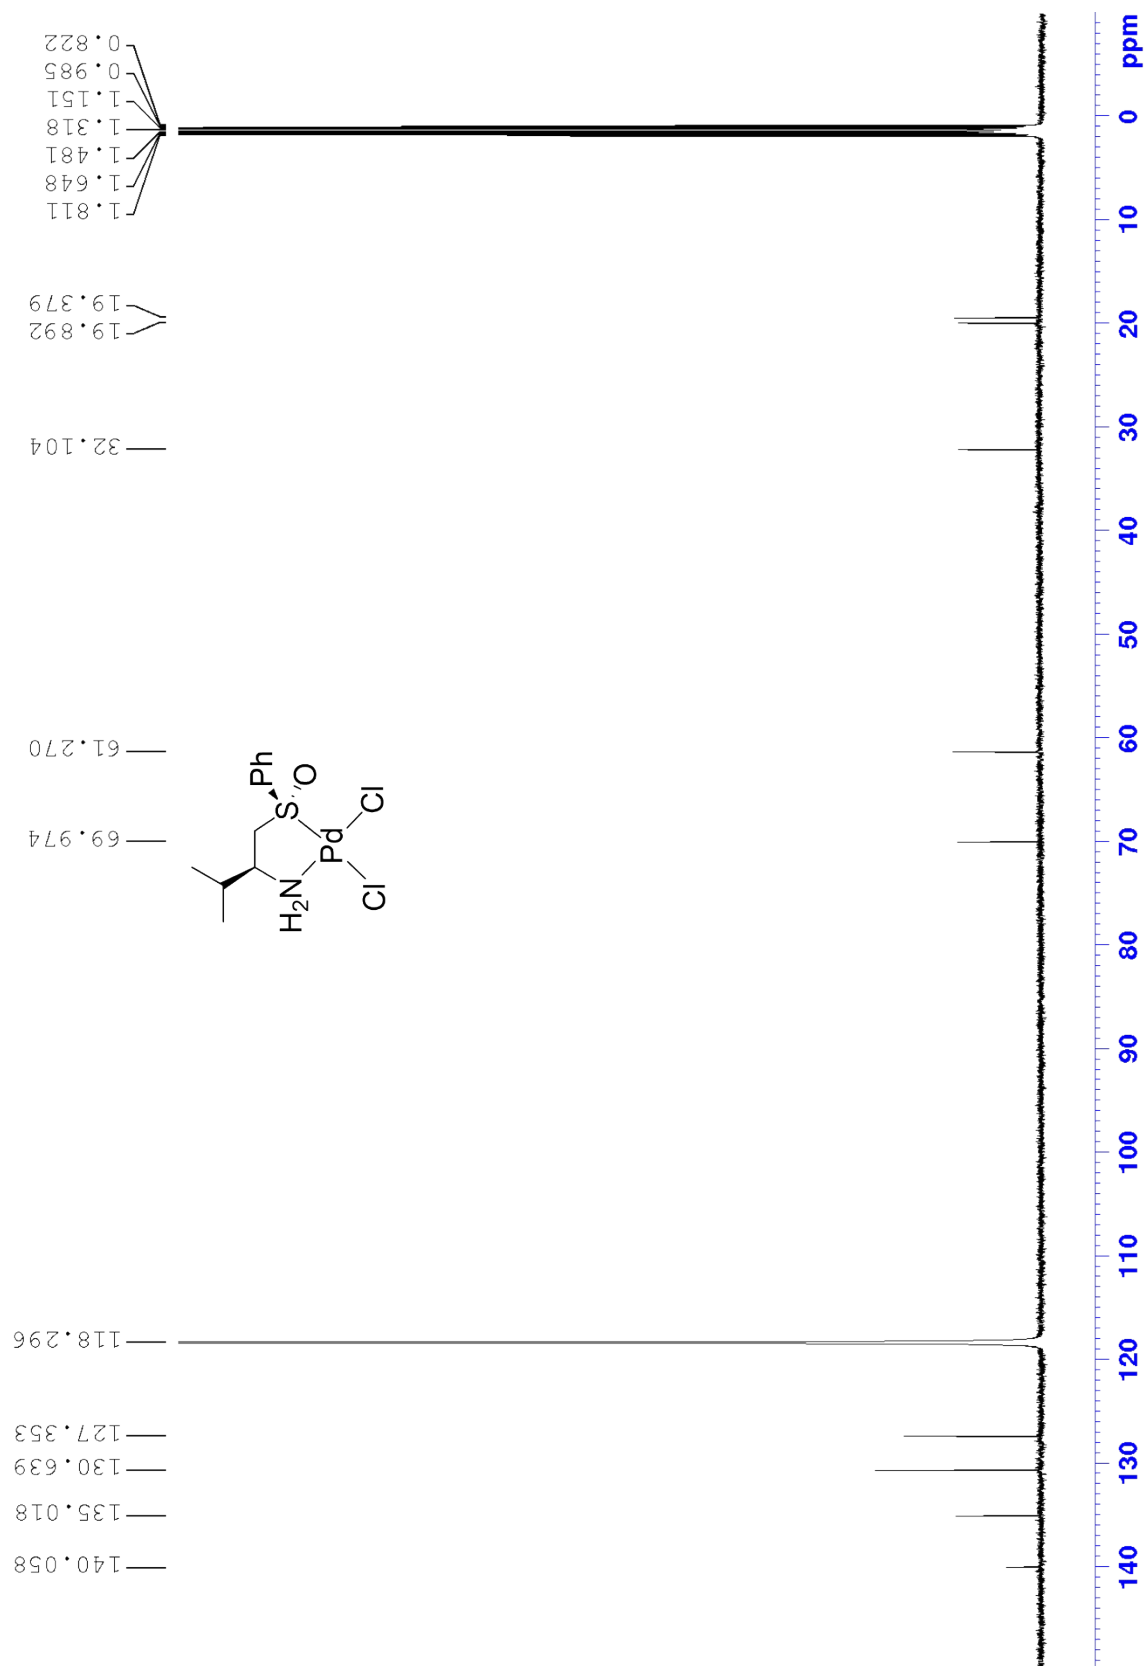

*cis*-Dichloro[( $S_C$ , $R_S$ )-3-methyl-1-(phenylsulfinyl)-2-butylamine]palladium (II), **15**( $S_C$ , $R_S$ )



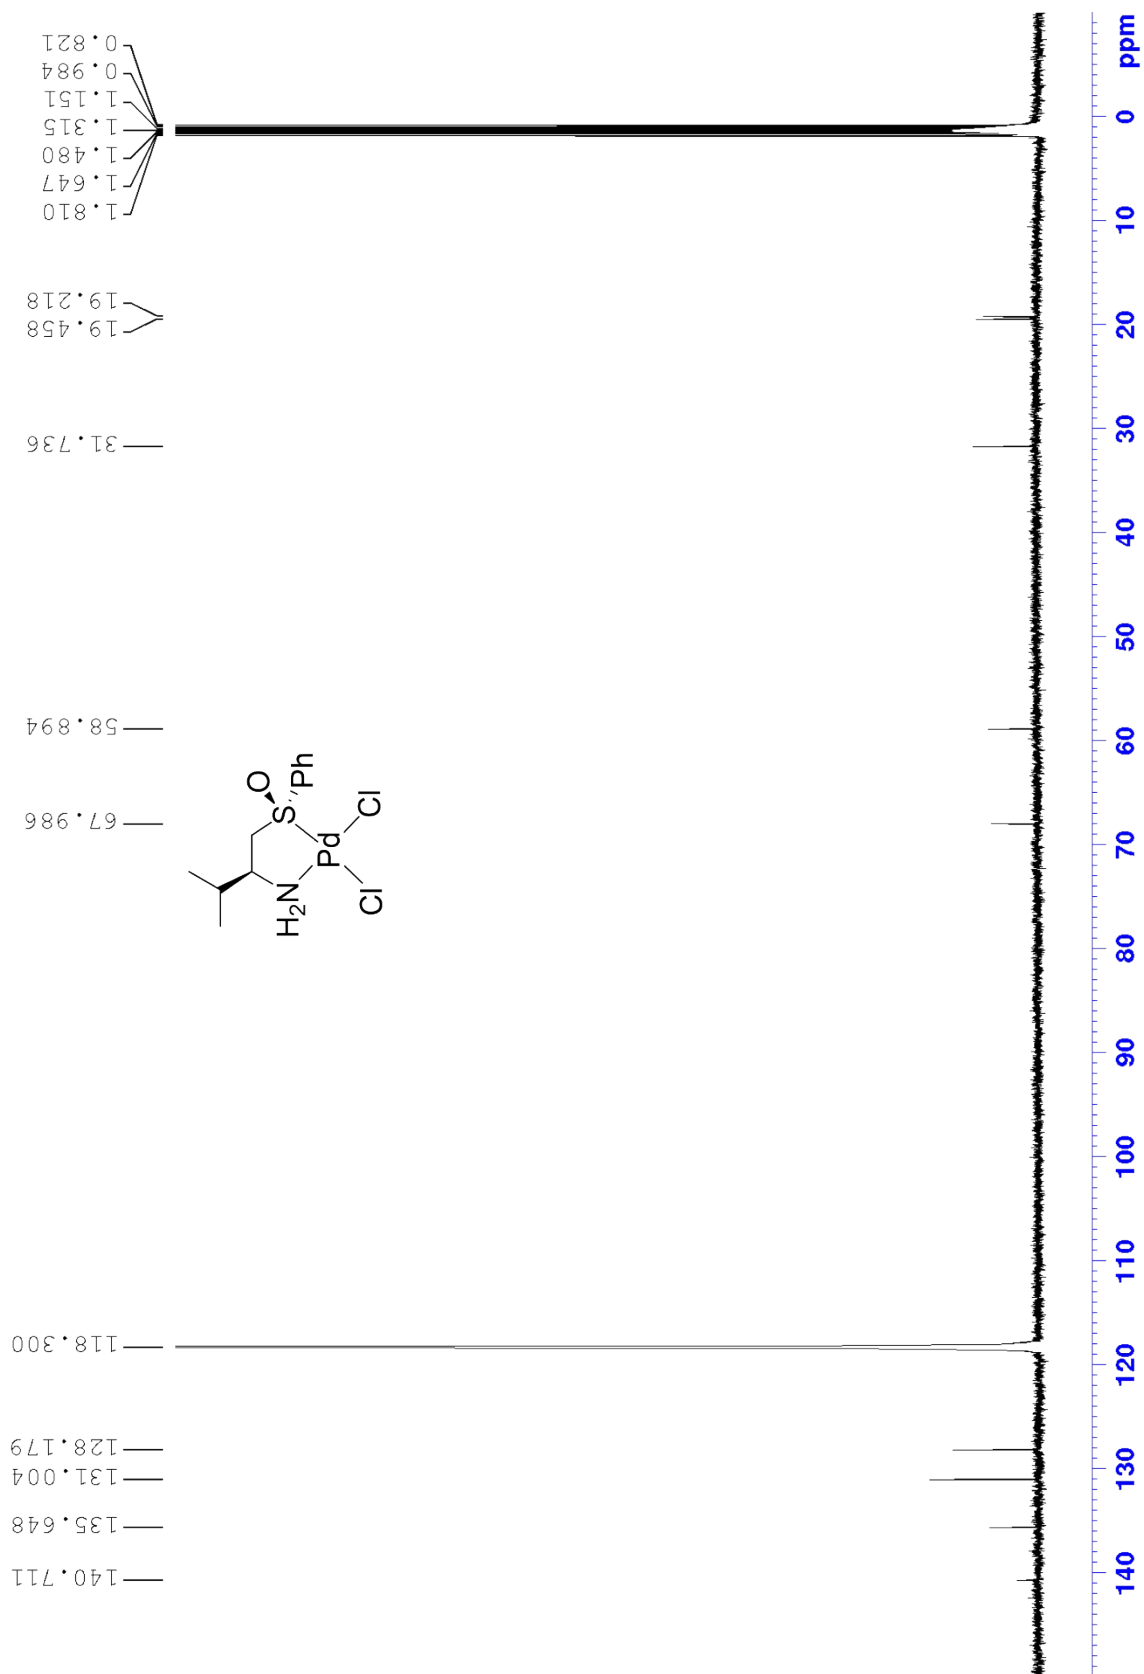

*cis*-Dichloro[(*S<sub>C</sub>S<sub>S</sub>*)-1-(2-Naphthyl)-2-(*tert*-butylsulfinyl)ethylamine]palladium (II), **16**(*S<sub>C</sub>S<sub>S</sub>*)

<sup>1</sup>H-NMR (500 MHz, CD<sub>3</sub>CN)

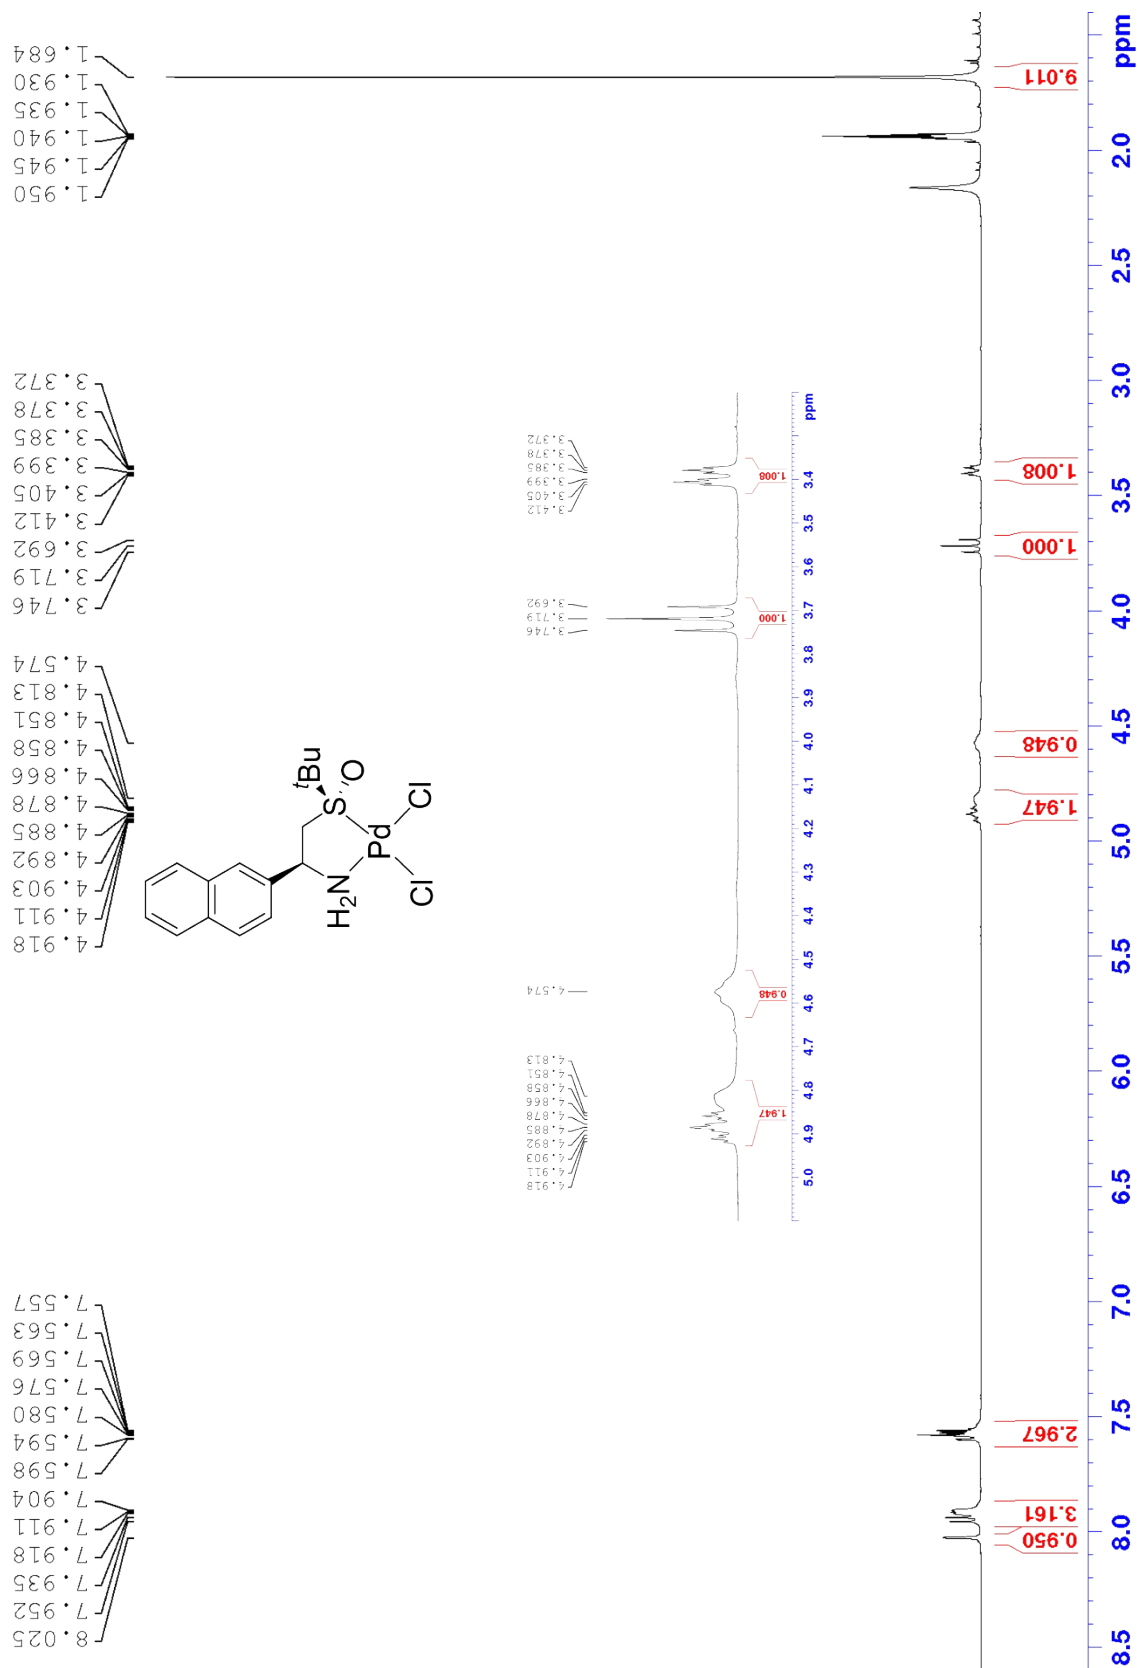

<sup>13</sup>C-NMR (500 MHz, CD<sub>3</sub>CN)

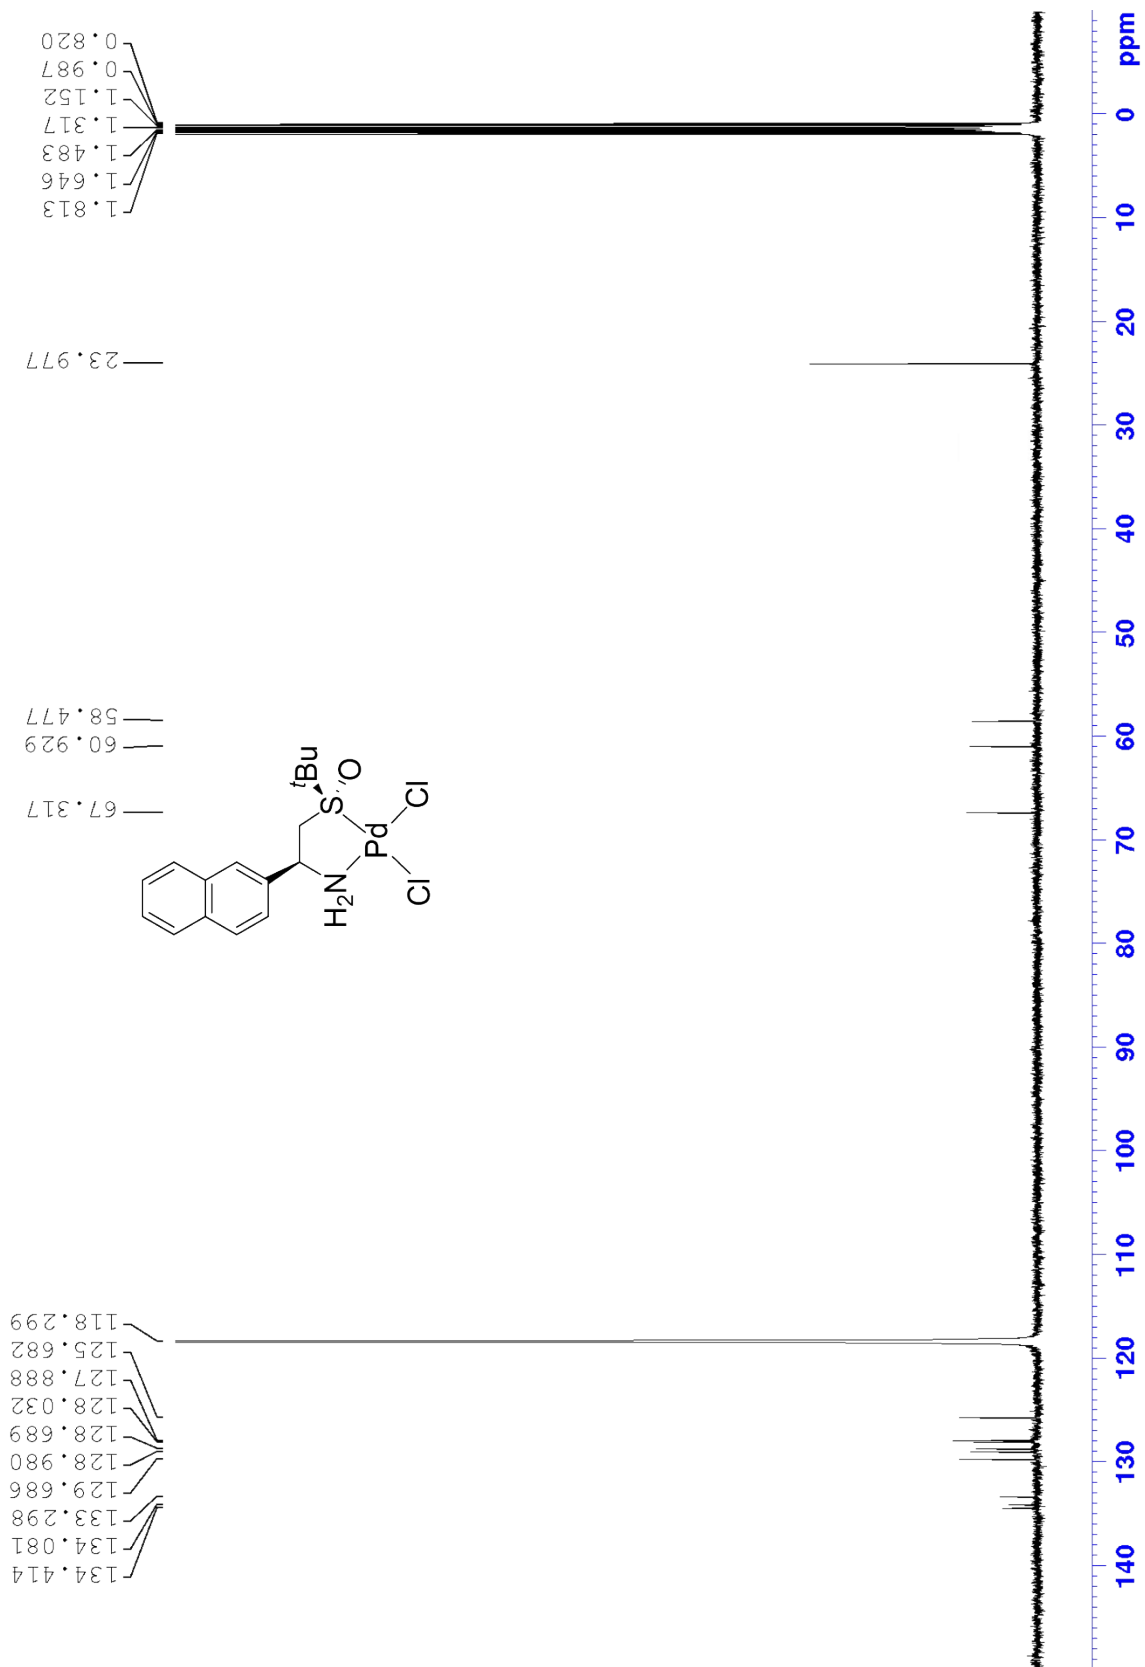

*cis*-Dichloro[(*S<sub>C</sub>R<sub>S</sub>*)-1-(2-Naphthyl)-2-(*tert*-butylsulfinyl)ethylamine]palladium (II), **16**(*S<sub>C</sub>R<sub>S</sub>*)

<sup>1</sup>H-NMR (500 MHz, CD<sub>3</sub>CN)

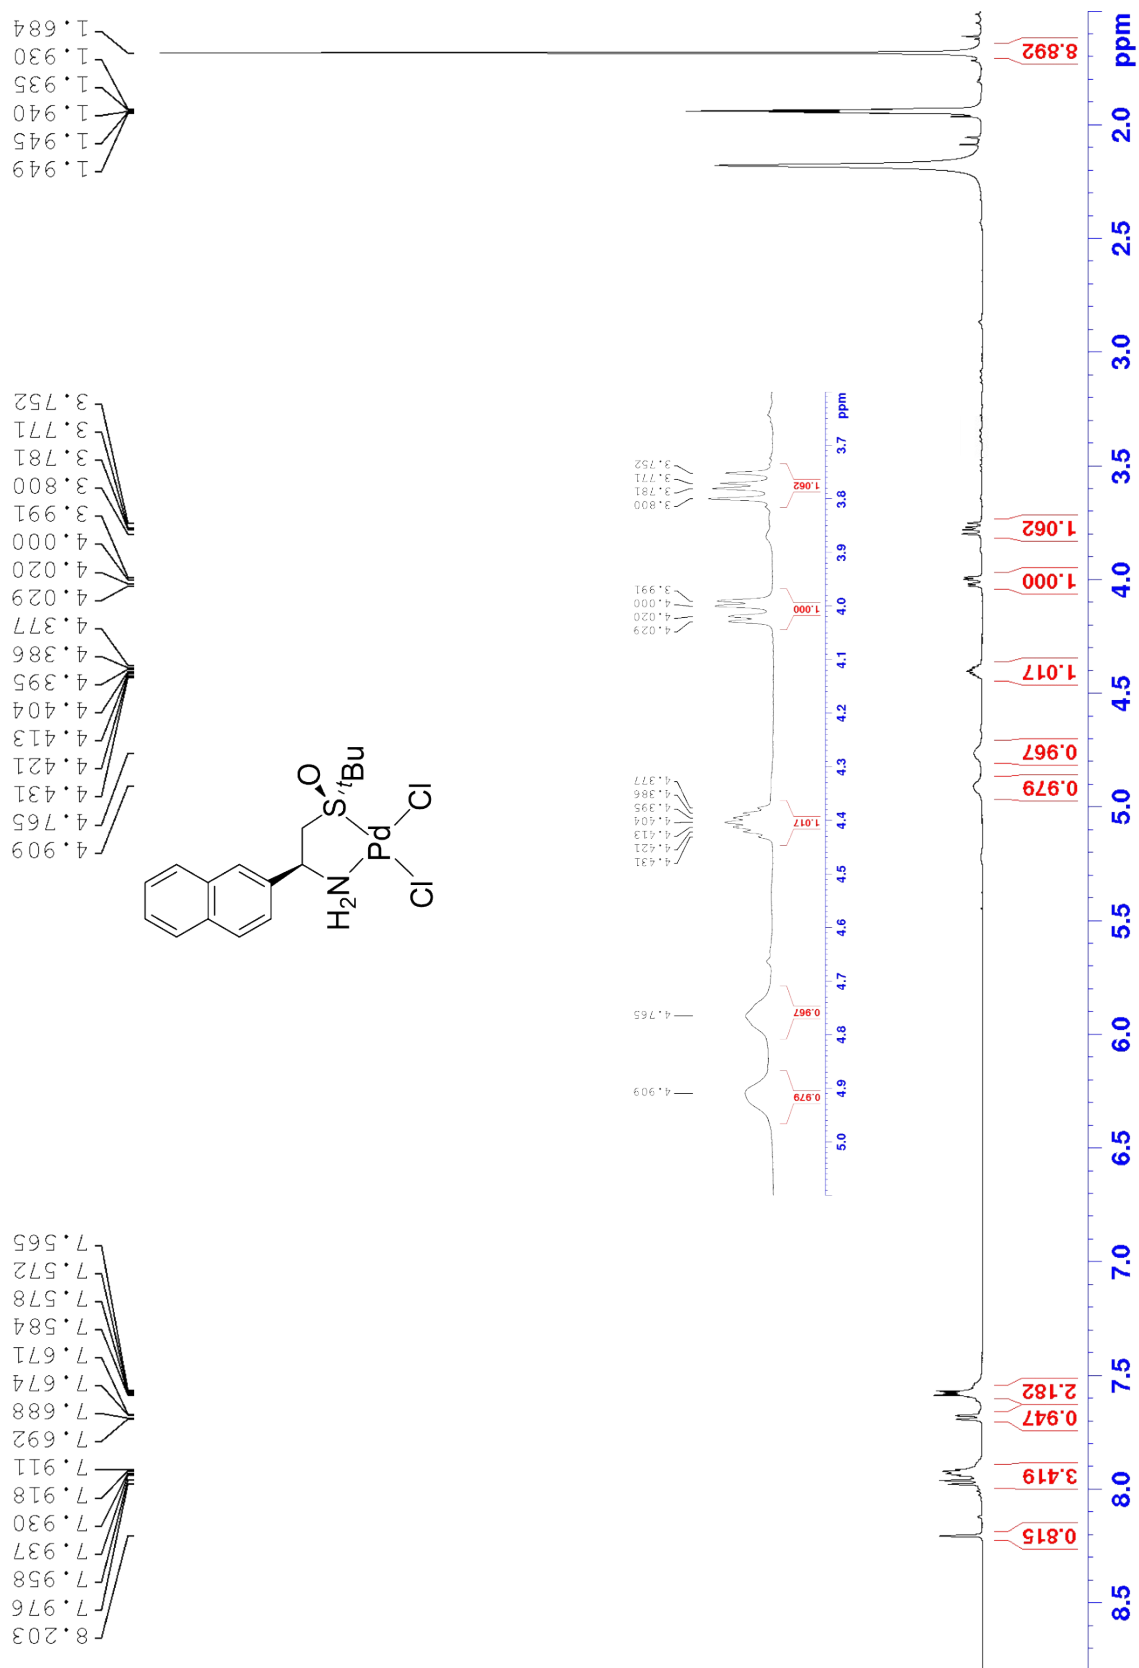

$^{13}\text{C-NMR}$  (500 MHz,  $\text{CD}_3\text{CN}$ )

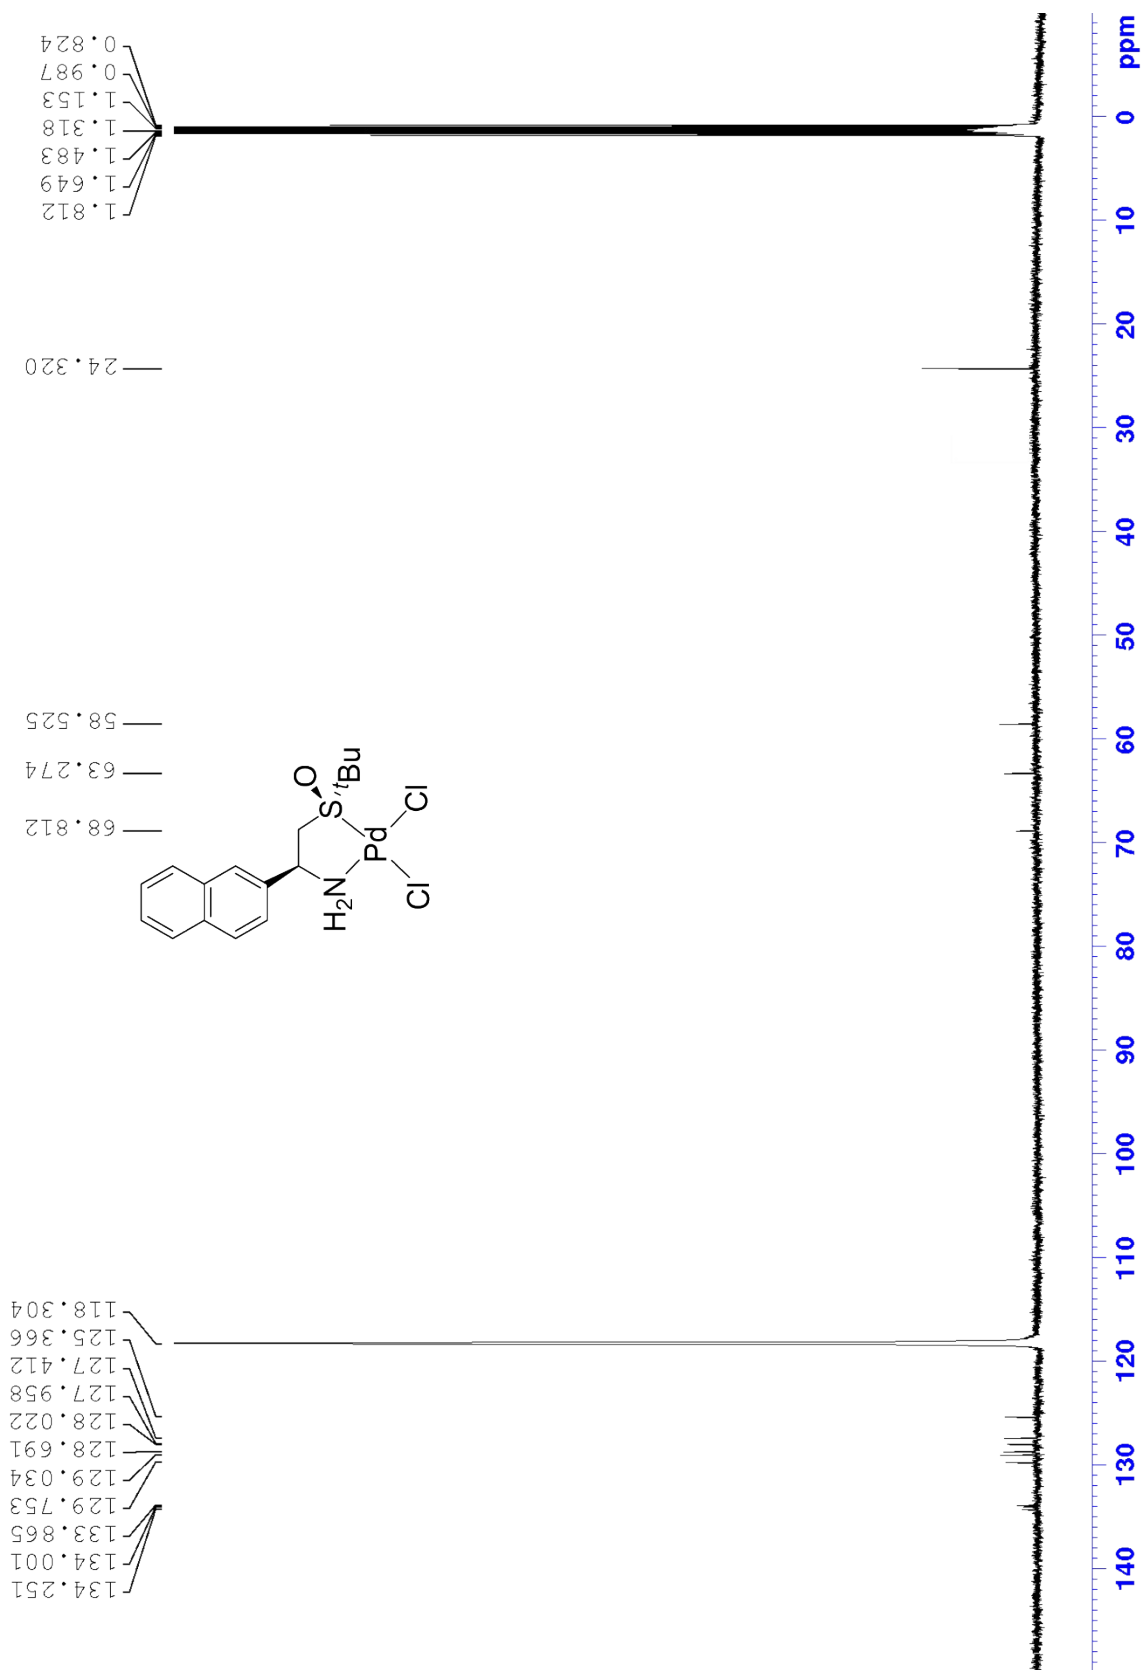



*cis*-Dichloro[(*S*<sub>C</sub>*S*<sub>S</sub>)-2-(*tert*-butylsulfinyl)-1-(phenyl)ethylamine]palladium (II), **17**(*S*<sub>C</sub>*S*<sub>S</sub>)

<sup>1</sup>H-NMR (500 MHz, CD<sub>3</sub>CN)

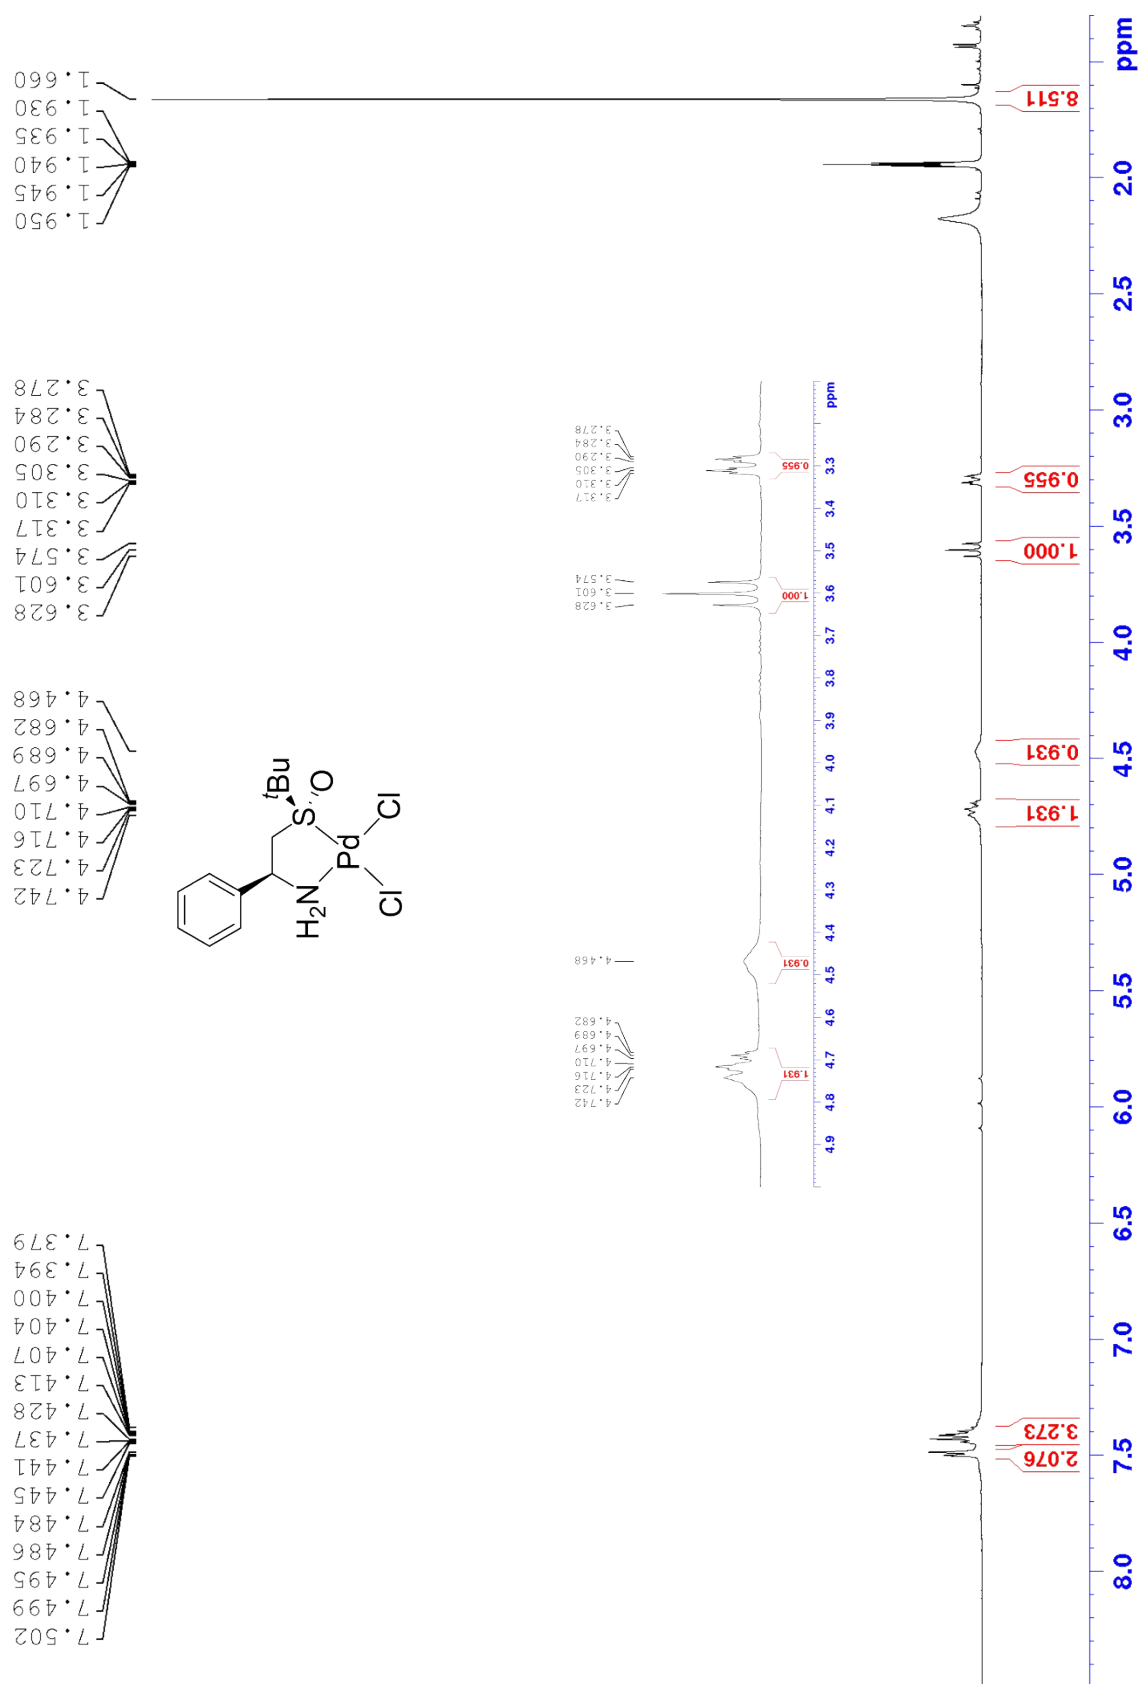

$^{13}\text{C-NMR}$  (500 MHz,  $\text{CD}_3\text{CN}$ )

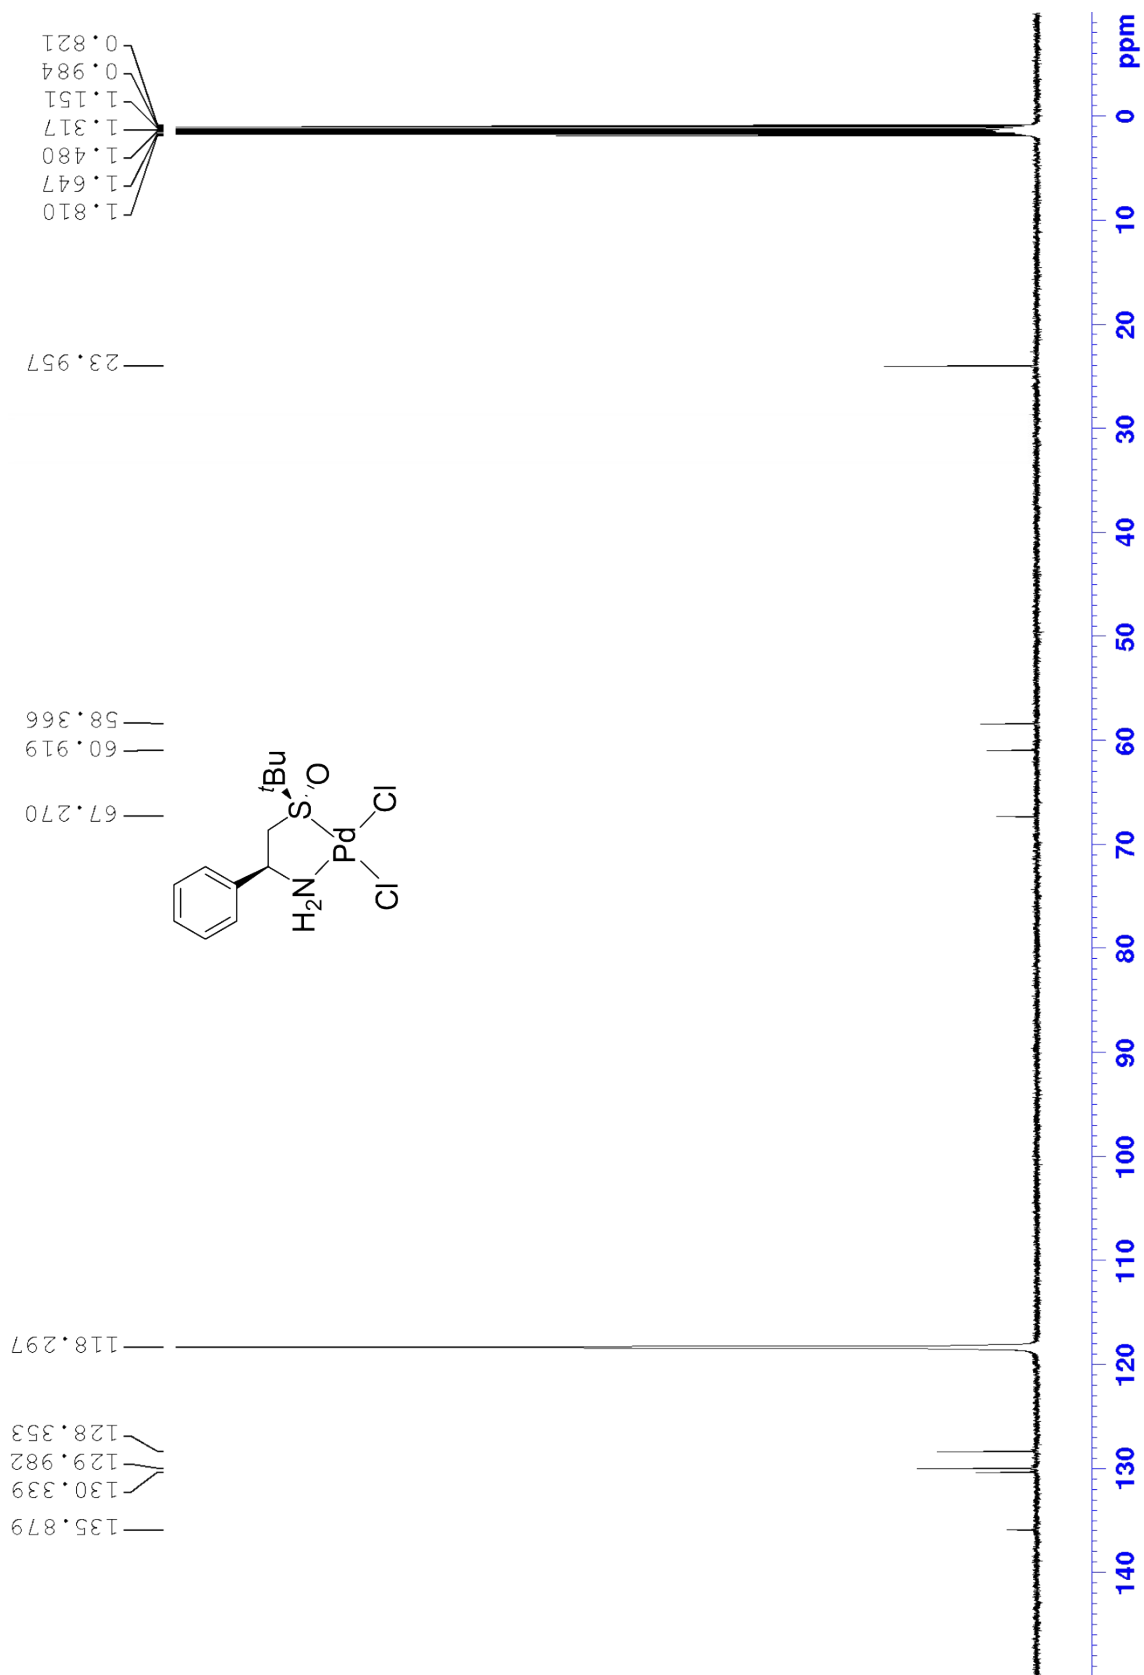

*cis*-Dichloro[(*S<sub>C</sub>R<sub>S</sub>*)-2-(*tert*-butylsulfinyl)-1-(phenyl)ethylamine]palladium (II), **17**(*S<sub>C</sub>R<sub>S</sub>*)

<sup>1</sup>H-NMR (500 MHz, CD<sub>3</sub>CN)

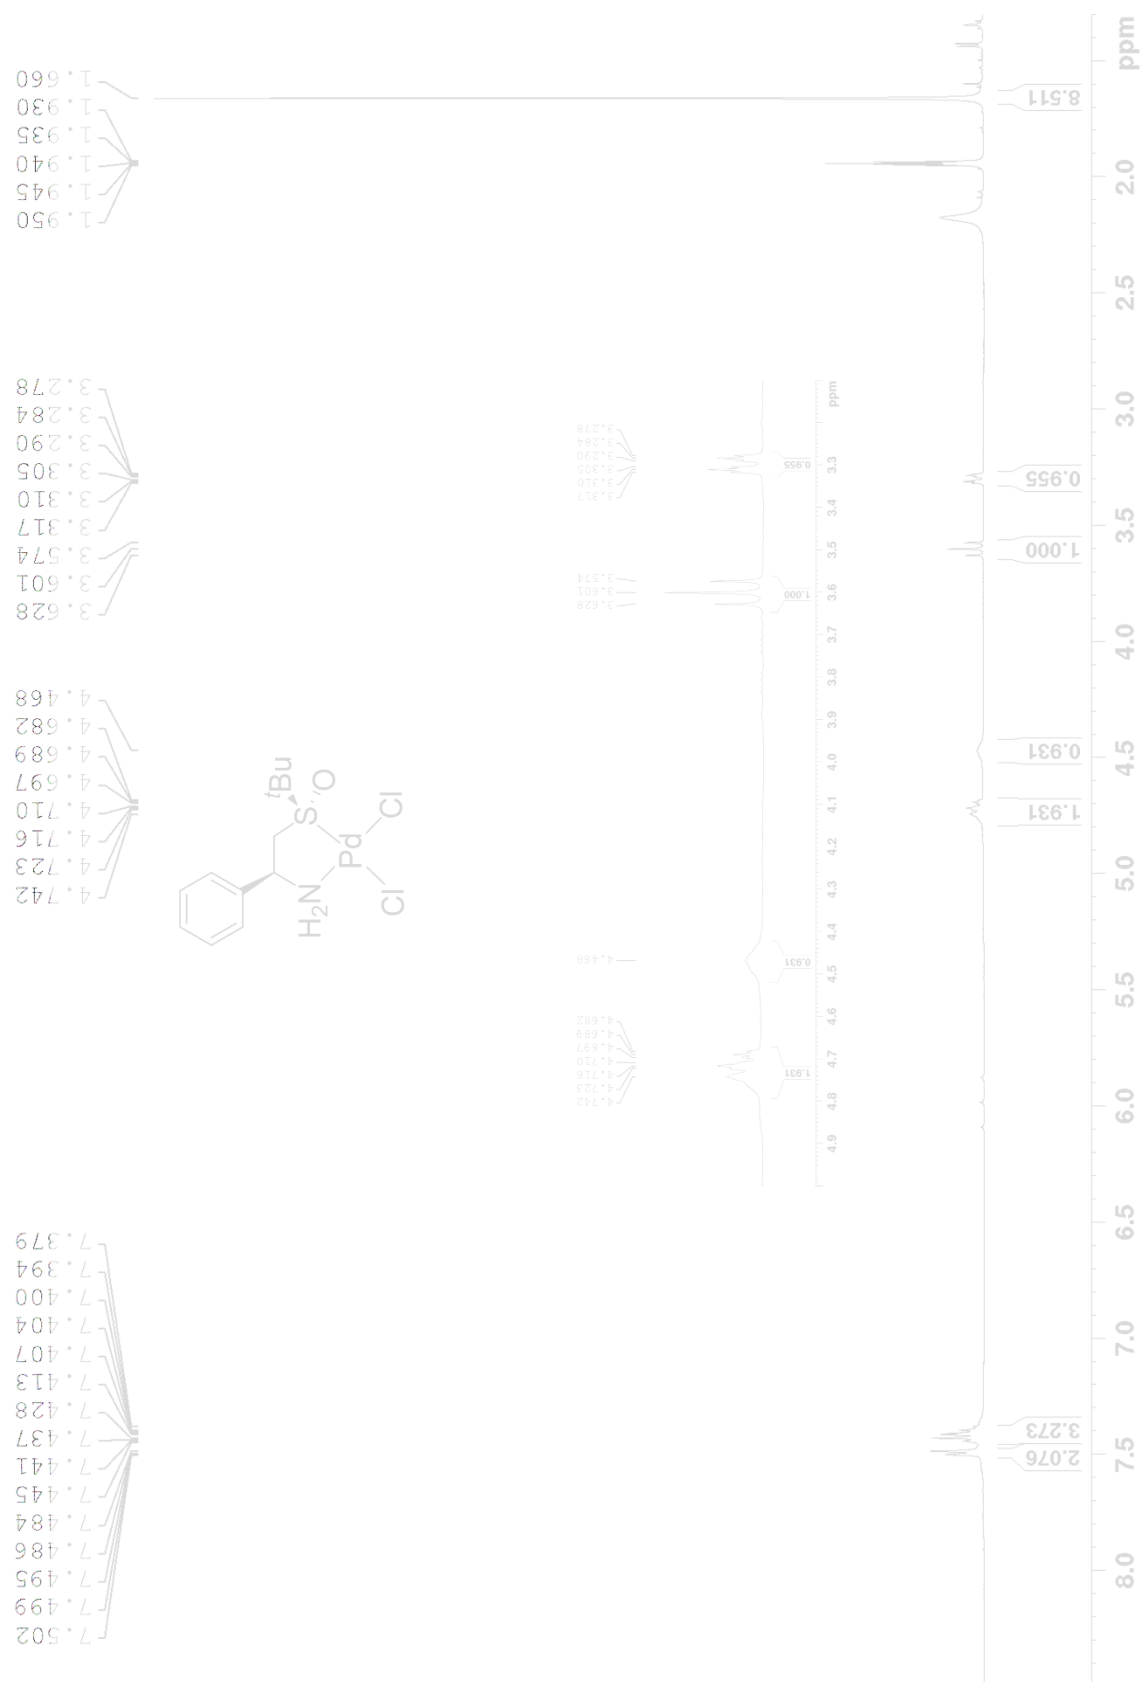

$^{13}\text{C-NMR}$  (500 MHz,  $\text{CD}_3\text{CN}$ )

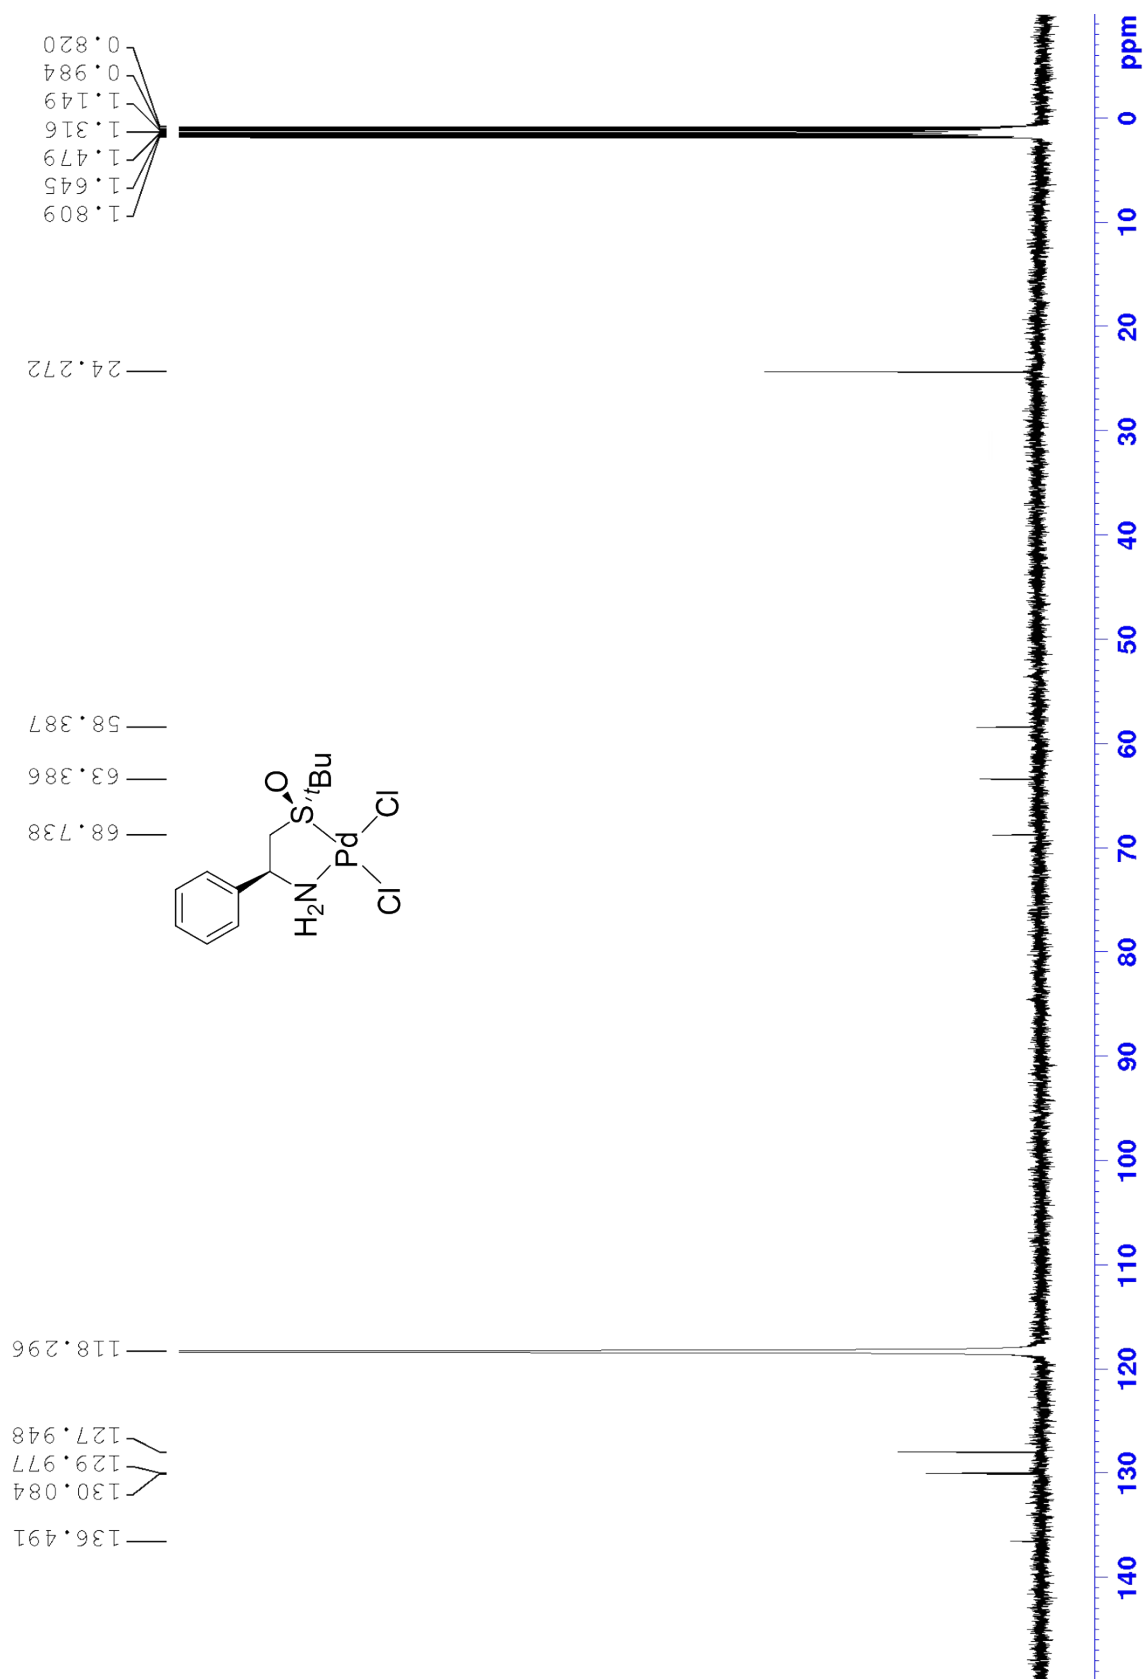

*cis*-Dichloro[(*S,C,S,S*)-1-(*tert*-butylsulfinyl)-3-methyl-2-butylamine]palladium (II), **18**(*S,C,S,S*)

$^1\text{H-NMR}$  (500 MHz,  $\text{CD}_3\text{CN}$ )

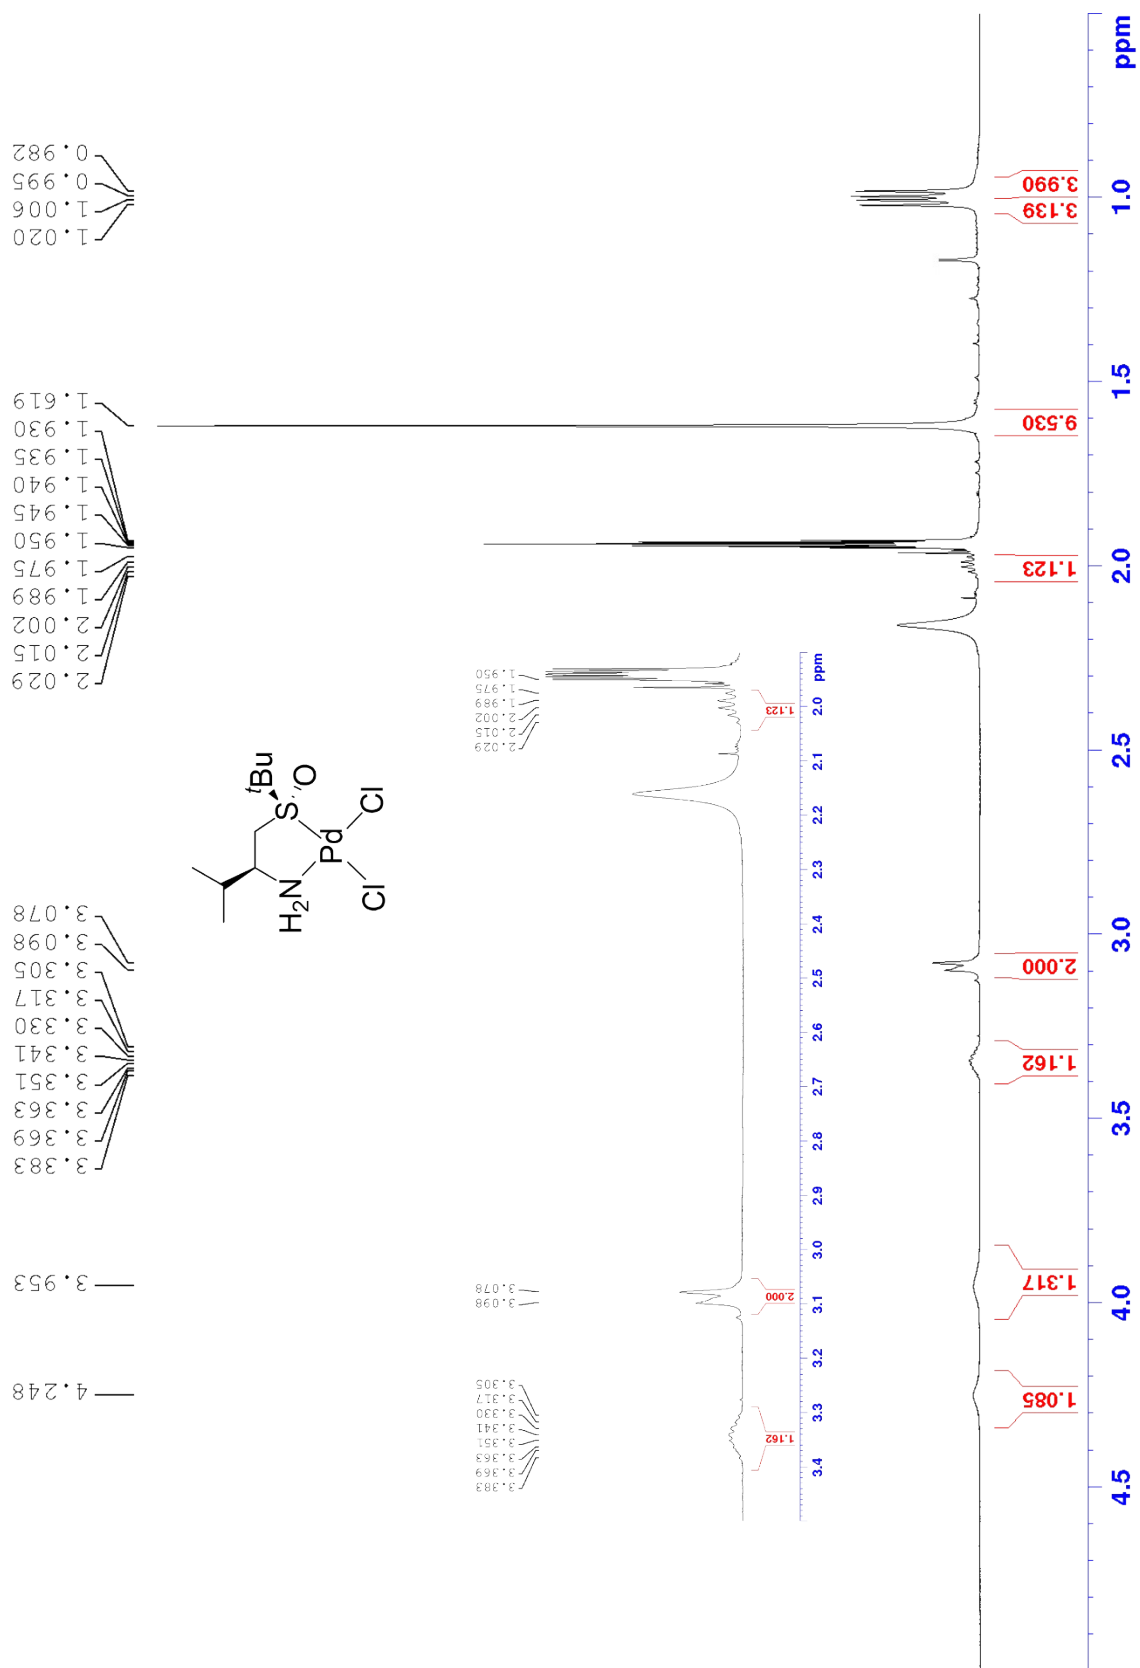

$^{13}\text{C}$ -NMR (500 MHz,  $\text{CD}_3\text{CN}$ )

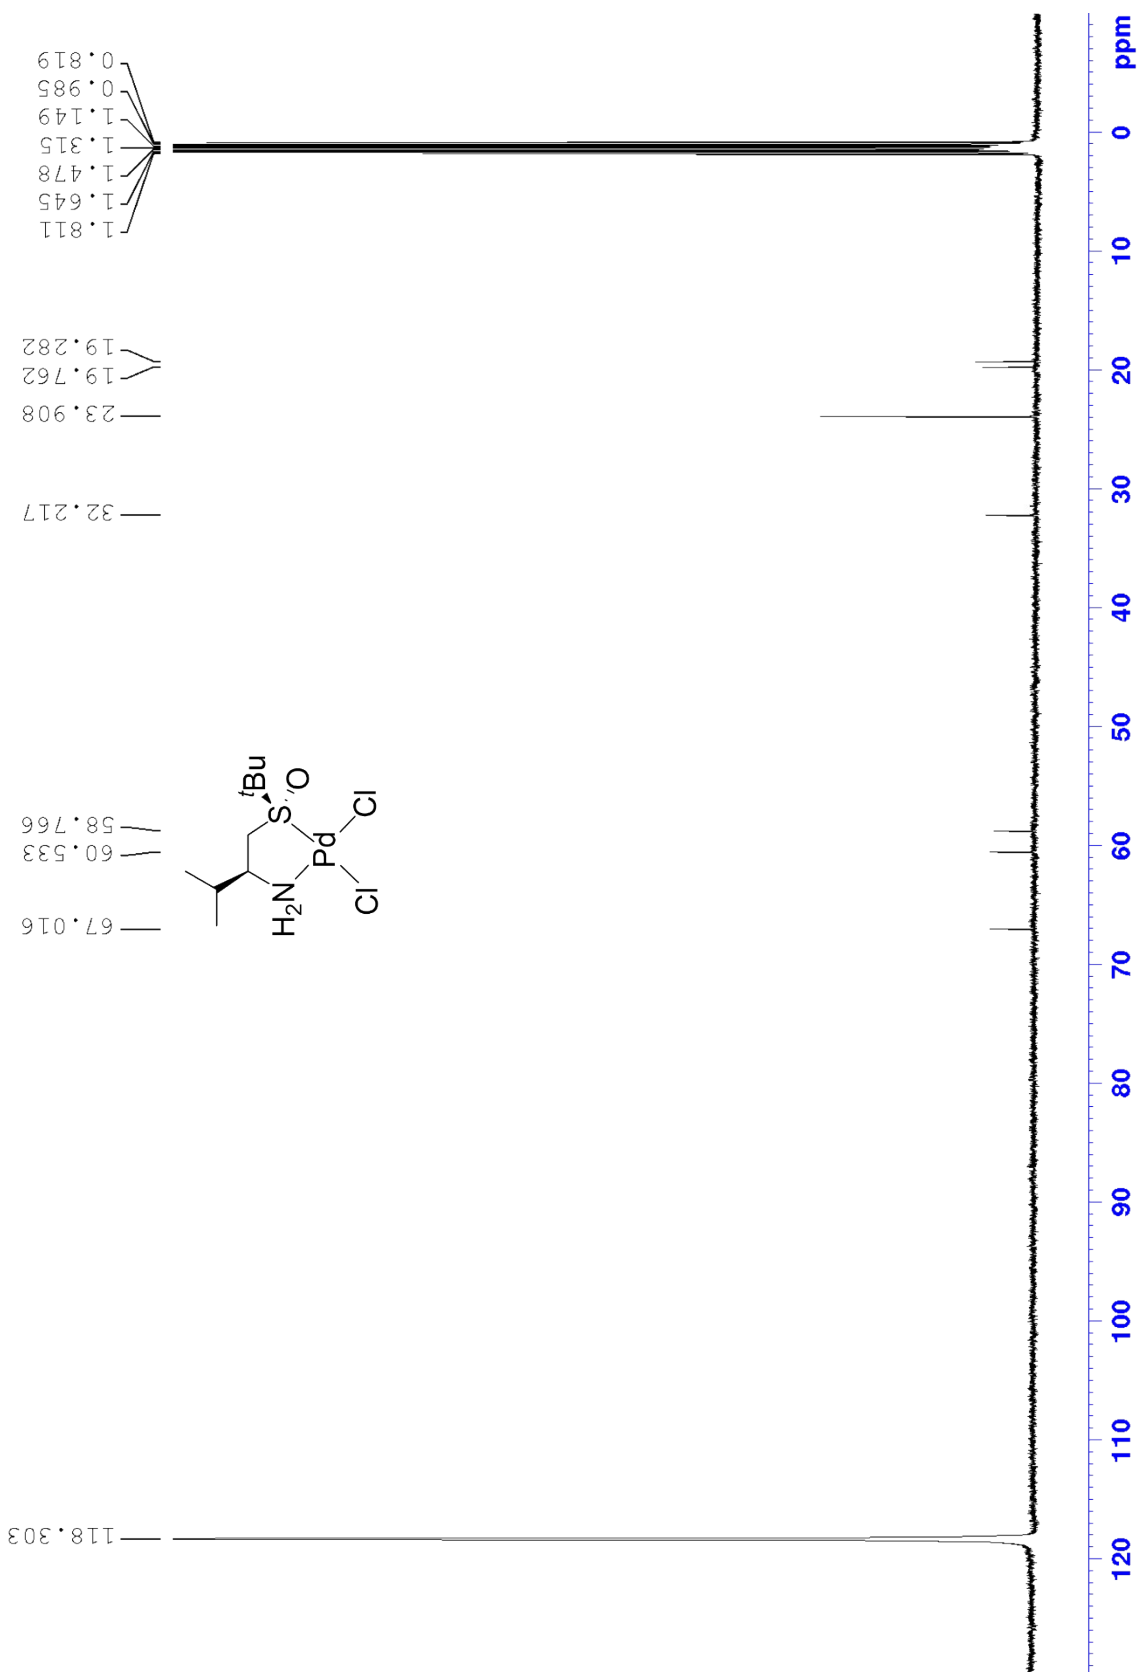



$^{13}\text{C-NMR}$  (500 MHz,  $\text{CD}_3\text{CN}$ )

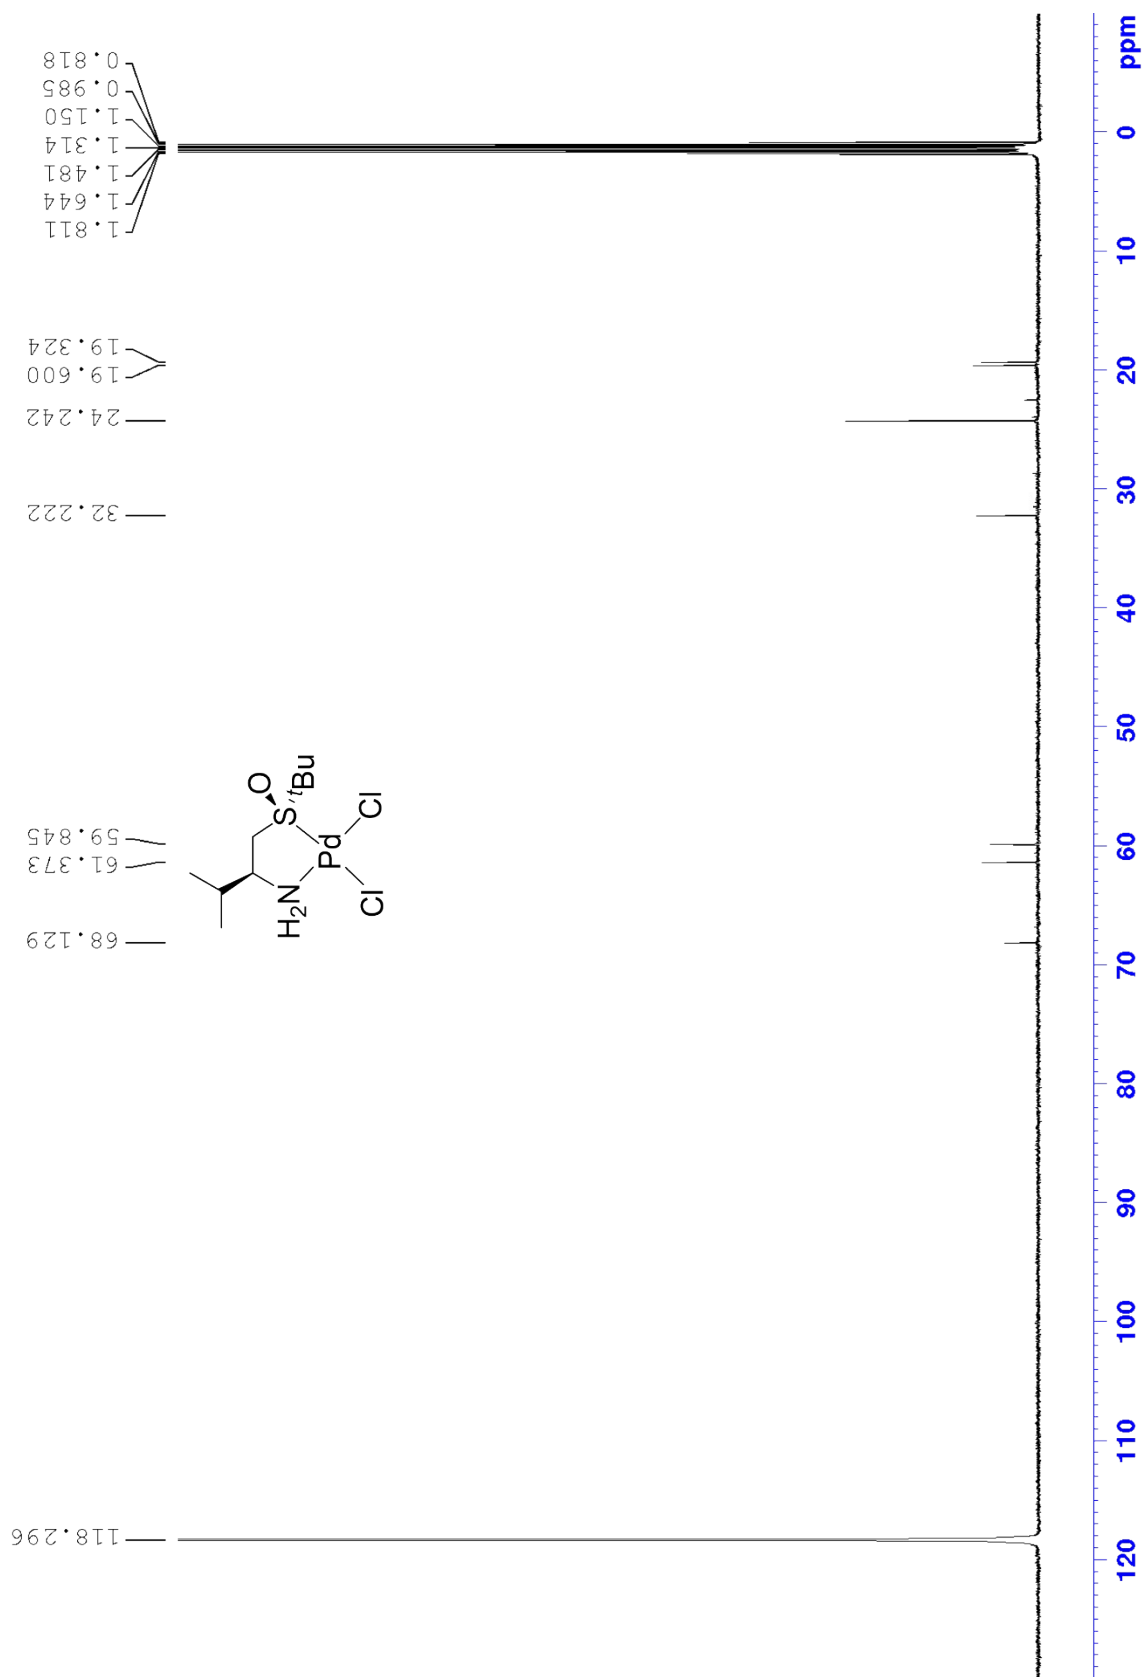



*cis*-Dichloro[(*S<sub>C</sub>R<sub>S</sub>*)/(*S<sub>C</sub>S<sub>S</sub>*)-1-(2-Naphthyl)-2-(*tert*-butylsulfonyl)ethylamine]palladium (II),  
**22**(*S<sub>C</sub>R<sub>S</sub>*)/(*S<sub>C</sub>S<sub>S</sub>*)

<sup>1</sup>H-NMR (500 MHz, CD<sub>3</sub>CN)

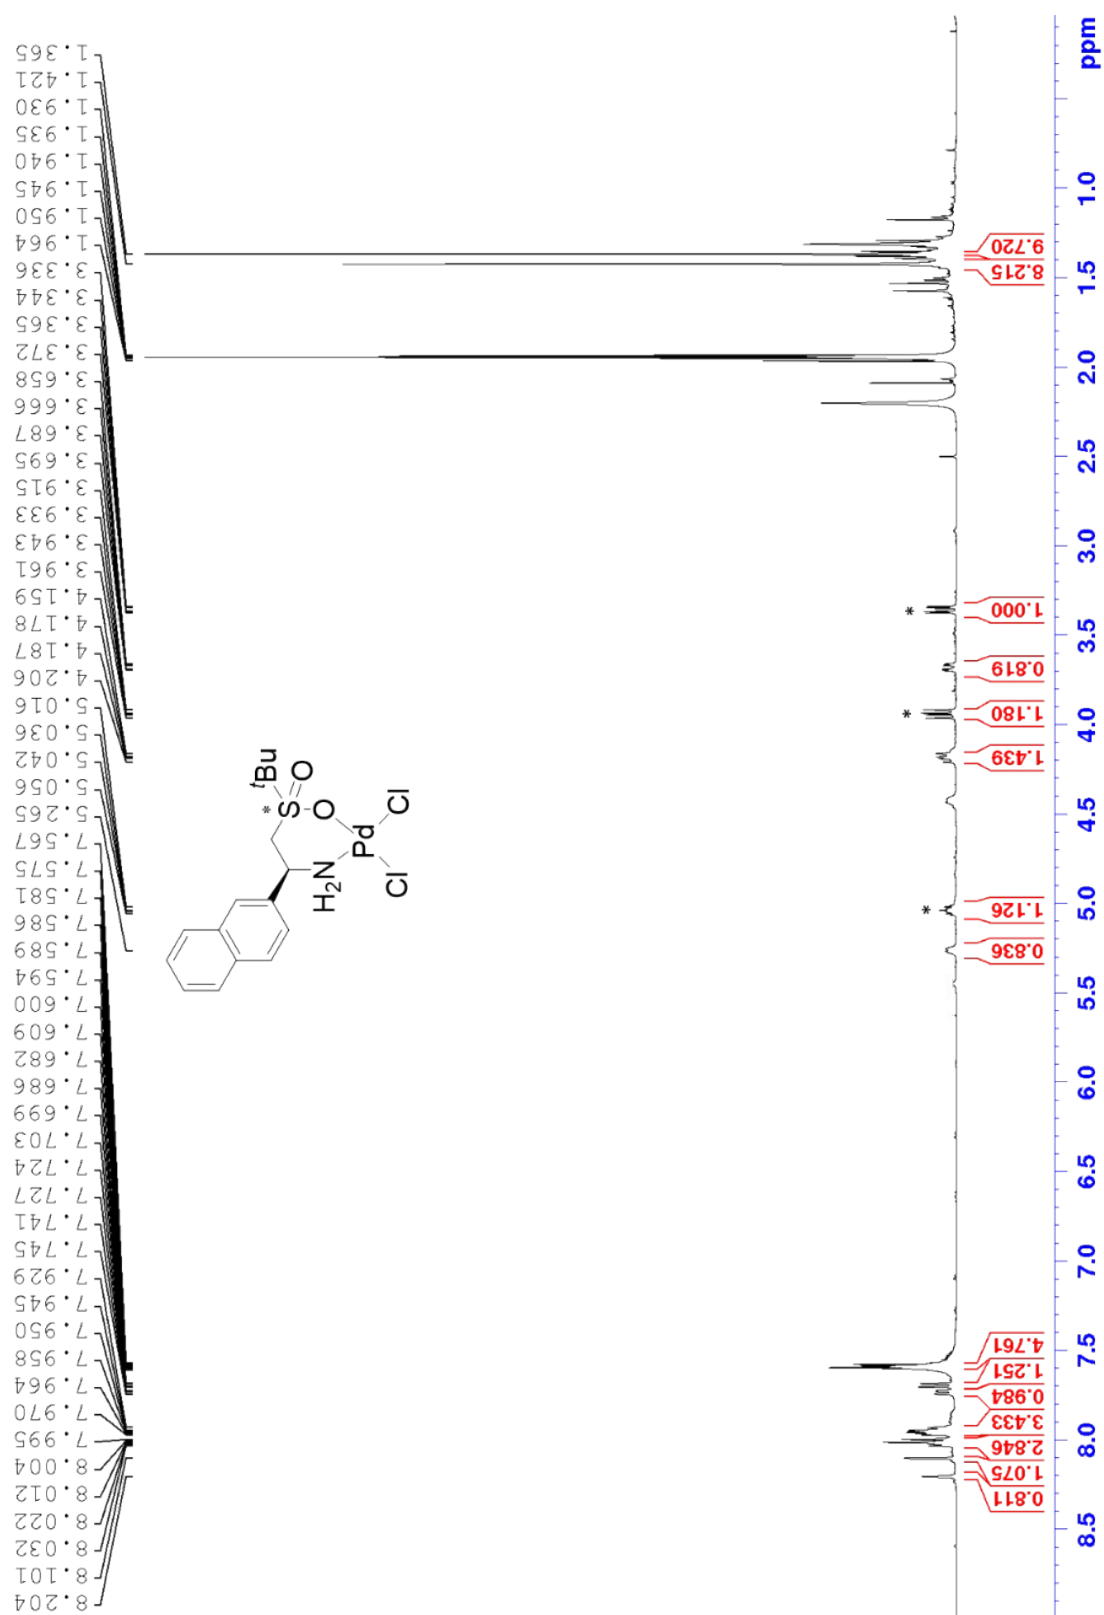

$^{13}\text{C}$ -NMR (500 MHz,  $\text{CD}_3\text{CN}$ )

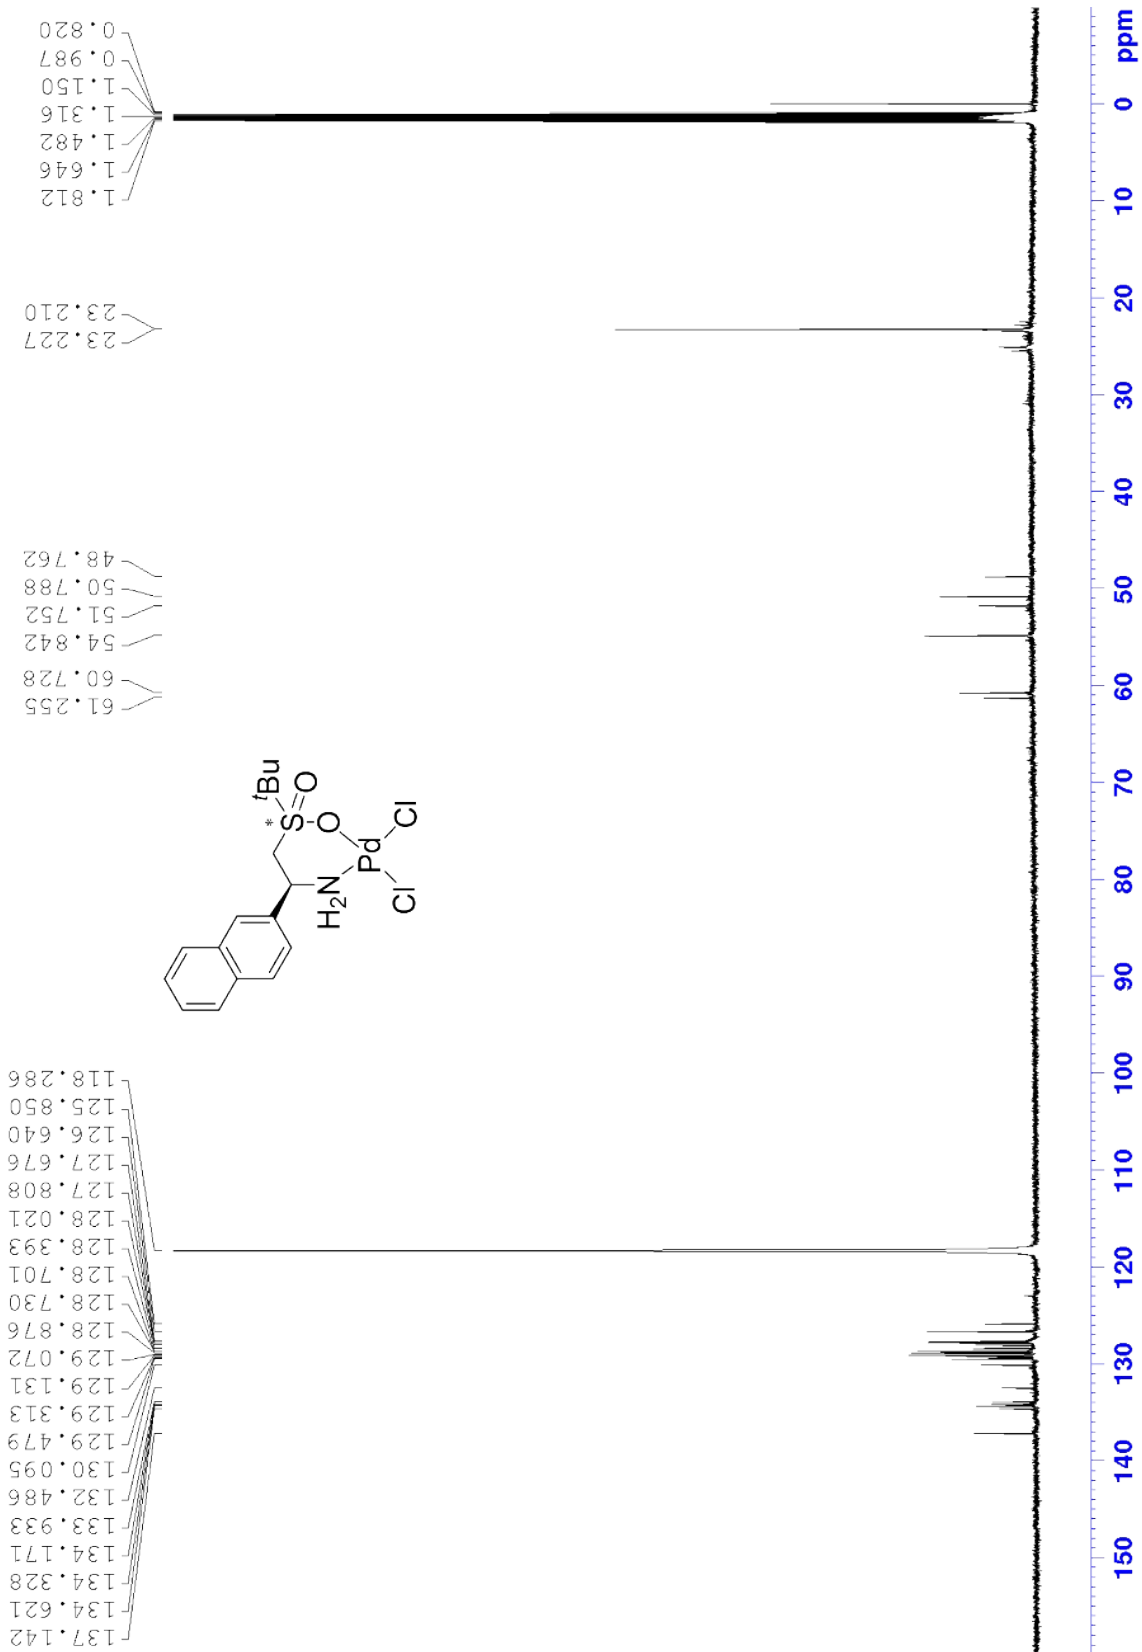

*(S<sub>C</sub>S<sub>S</sub>)-1-Phenyl-2-(phenylsulfinyl)ethylamine, 19(S<sub>C</sub>S<sub>S</sub>)*

<sup>1</sup>H-NMR (500 MHz, CDCl<sub>3</sub>)

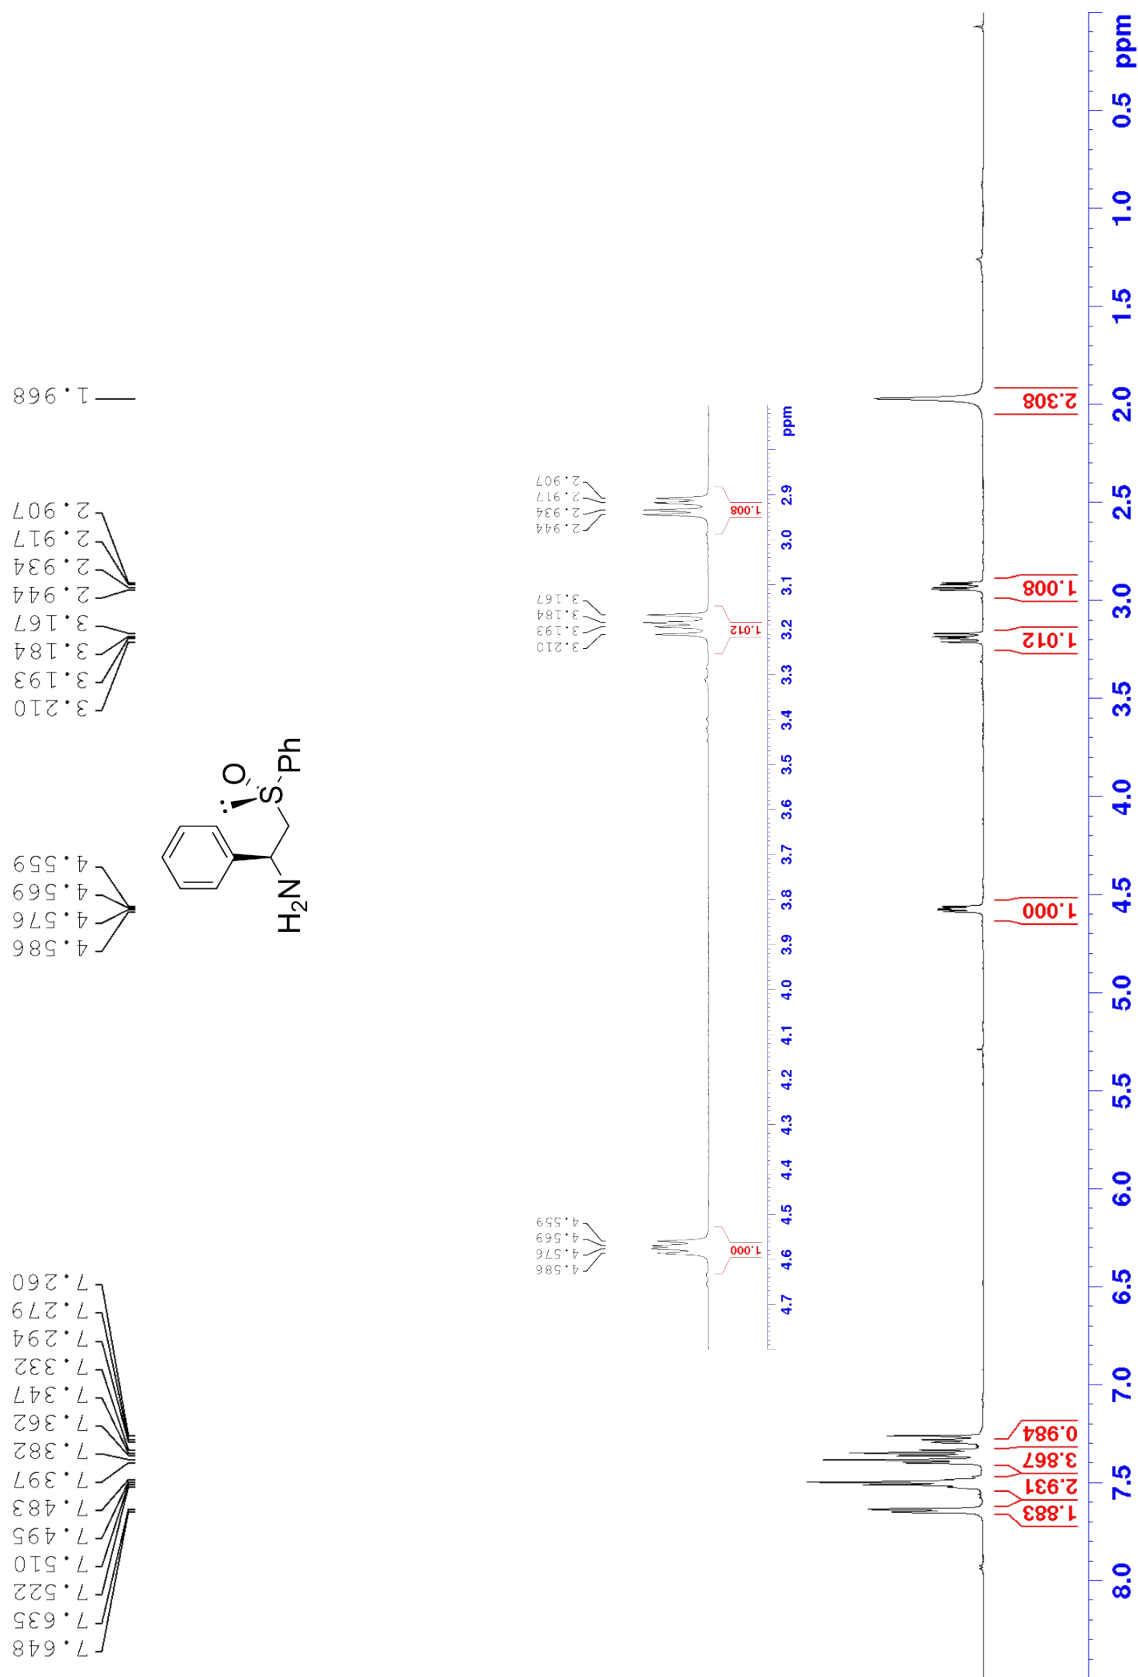

<sup>13</sup>C-NMR (500 MHz, CDCl<sub>3</sub>)

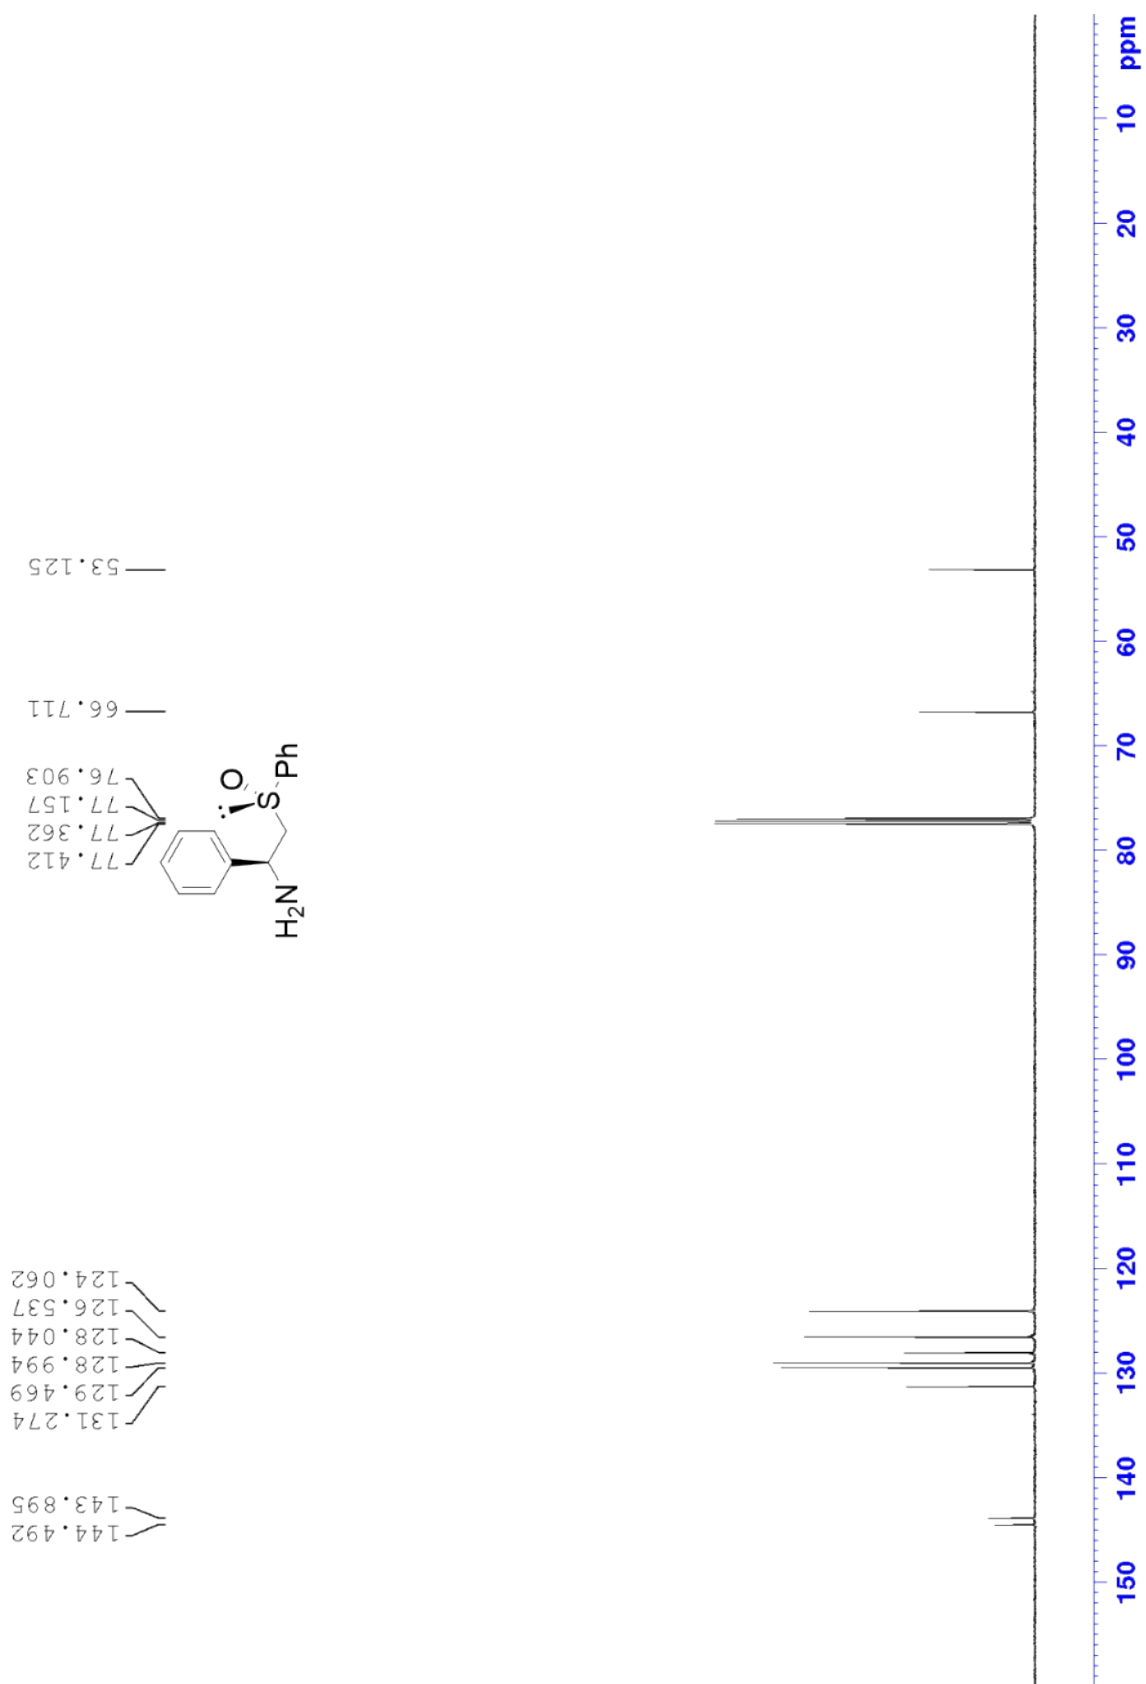

*(S<sub>C</sub>,R<sub>S</sub>)-1-(Phenylsulfinyl)-3-methylbut-2-ylamine, 23(S<sub>C</sub>,R<sub>S</sub>)*

<sup>1</sup>H-NMR (500 MHz, MeOD)

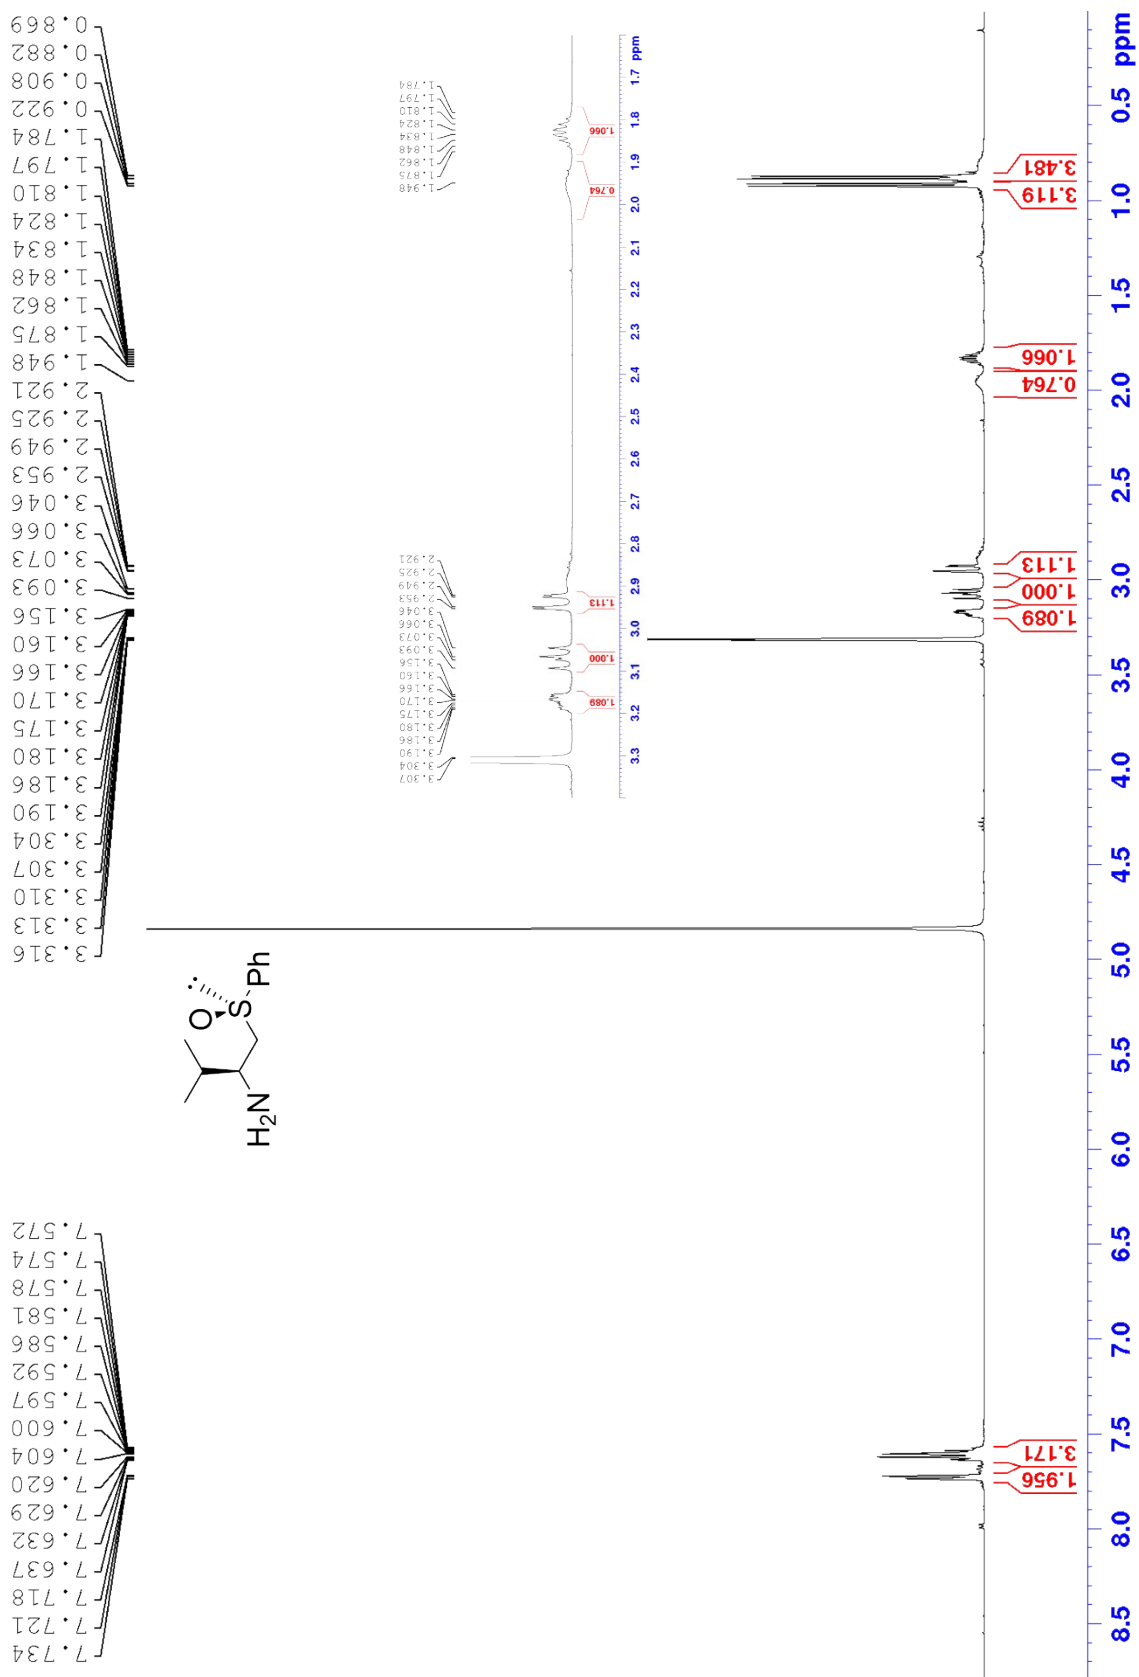

$^{13}\text{C}$ -NMR (500 MHz, MeOD)

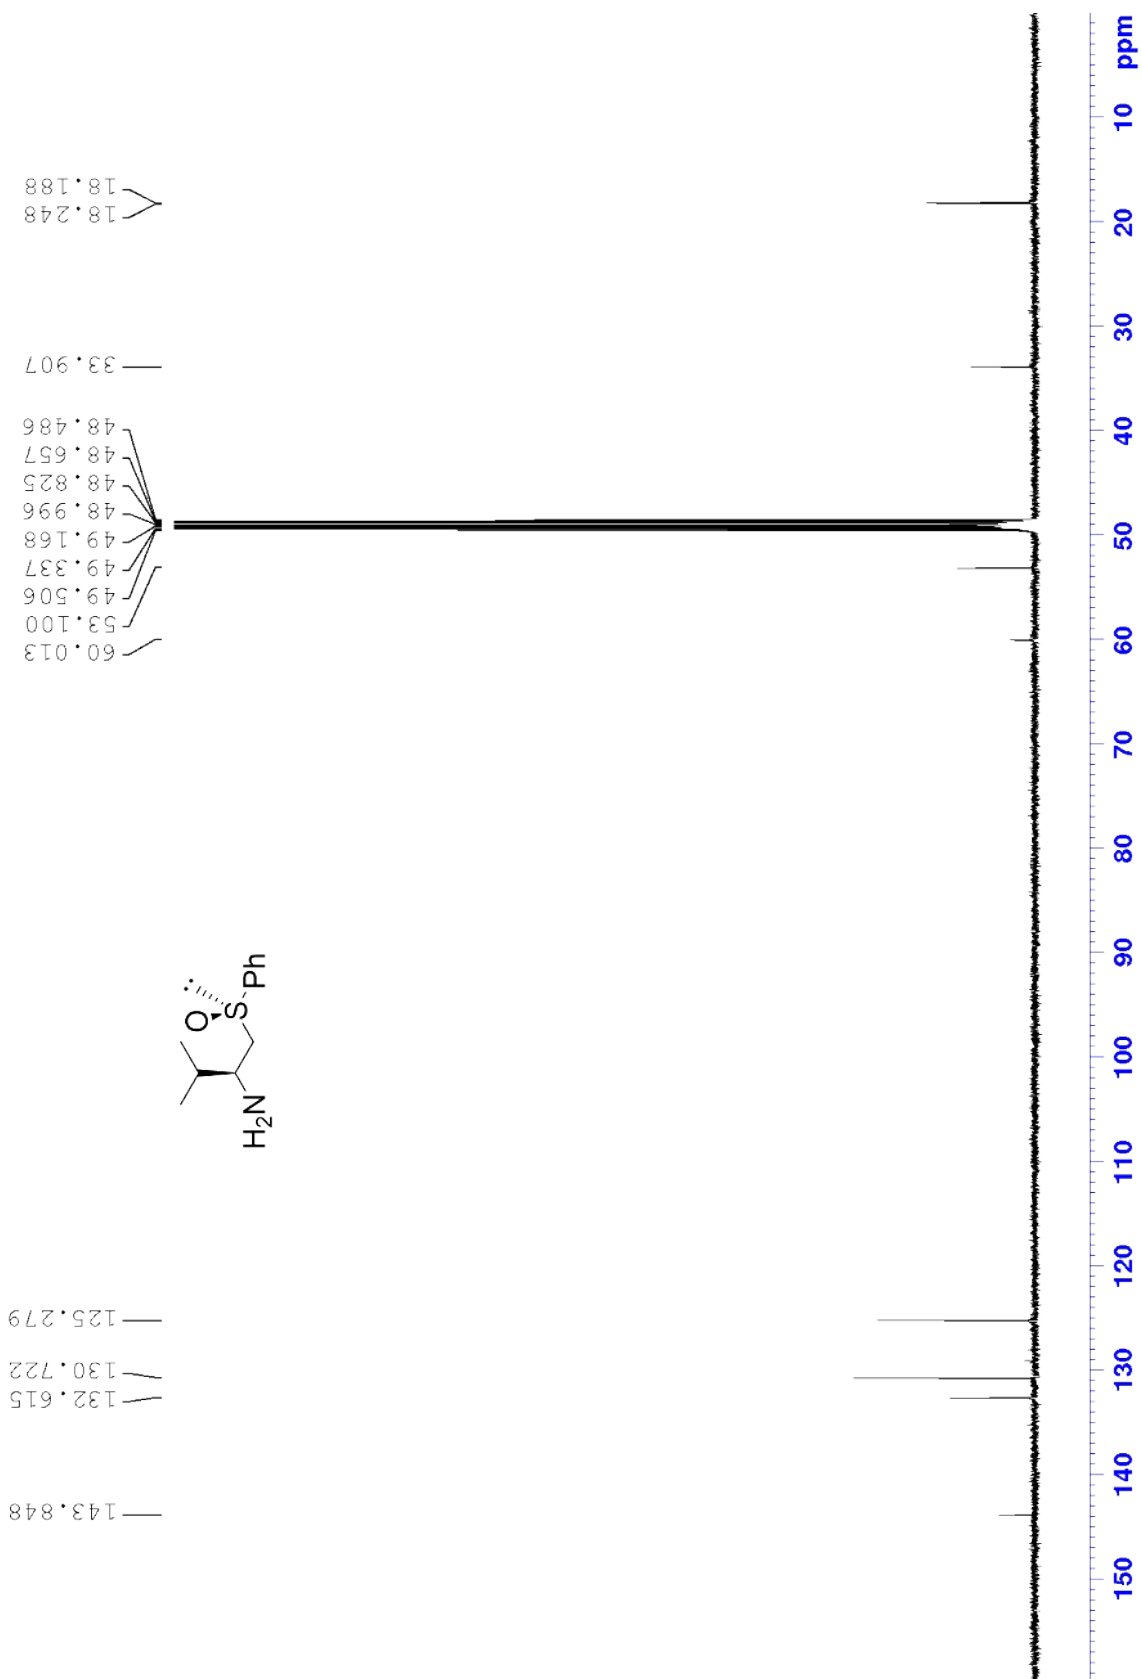

*(S<sub>C</sub>R<sub>S</sub>)-1-(2-Naphthyl)-2-(tert-butylsulfinyl)ethylamine, 24(S<sub>C</sub>R<sub>S</sub>)*

<sup>1</sup>H-NMR (500 MHz, MeOD)

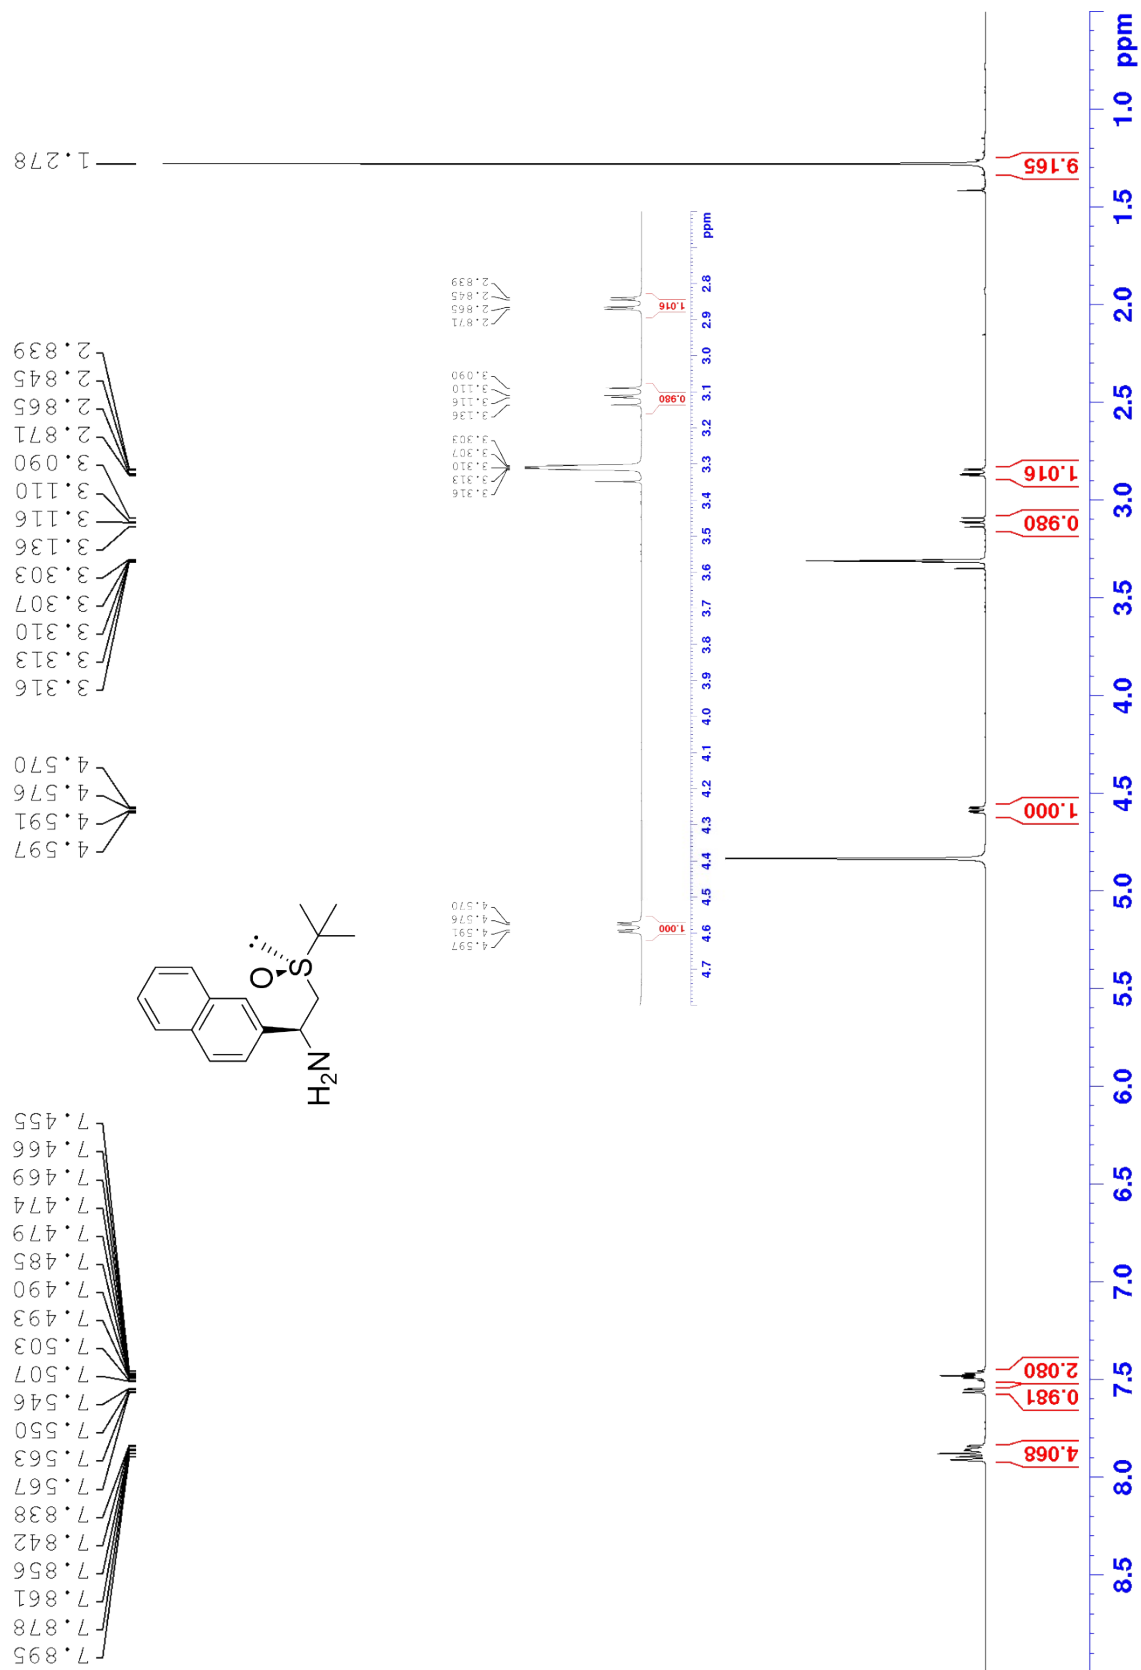

<sup>13</sup>C-NMR (500 MHz, MeOD)

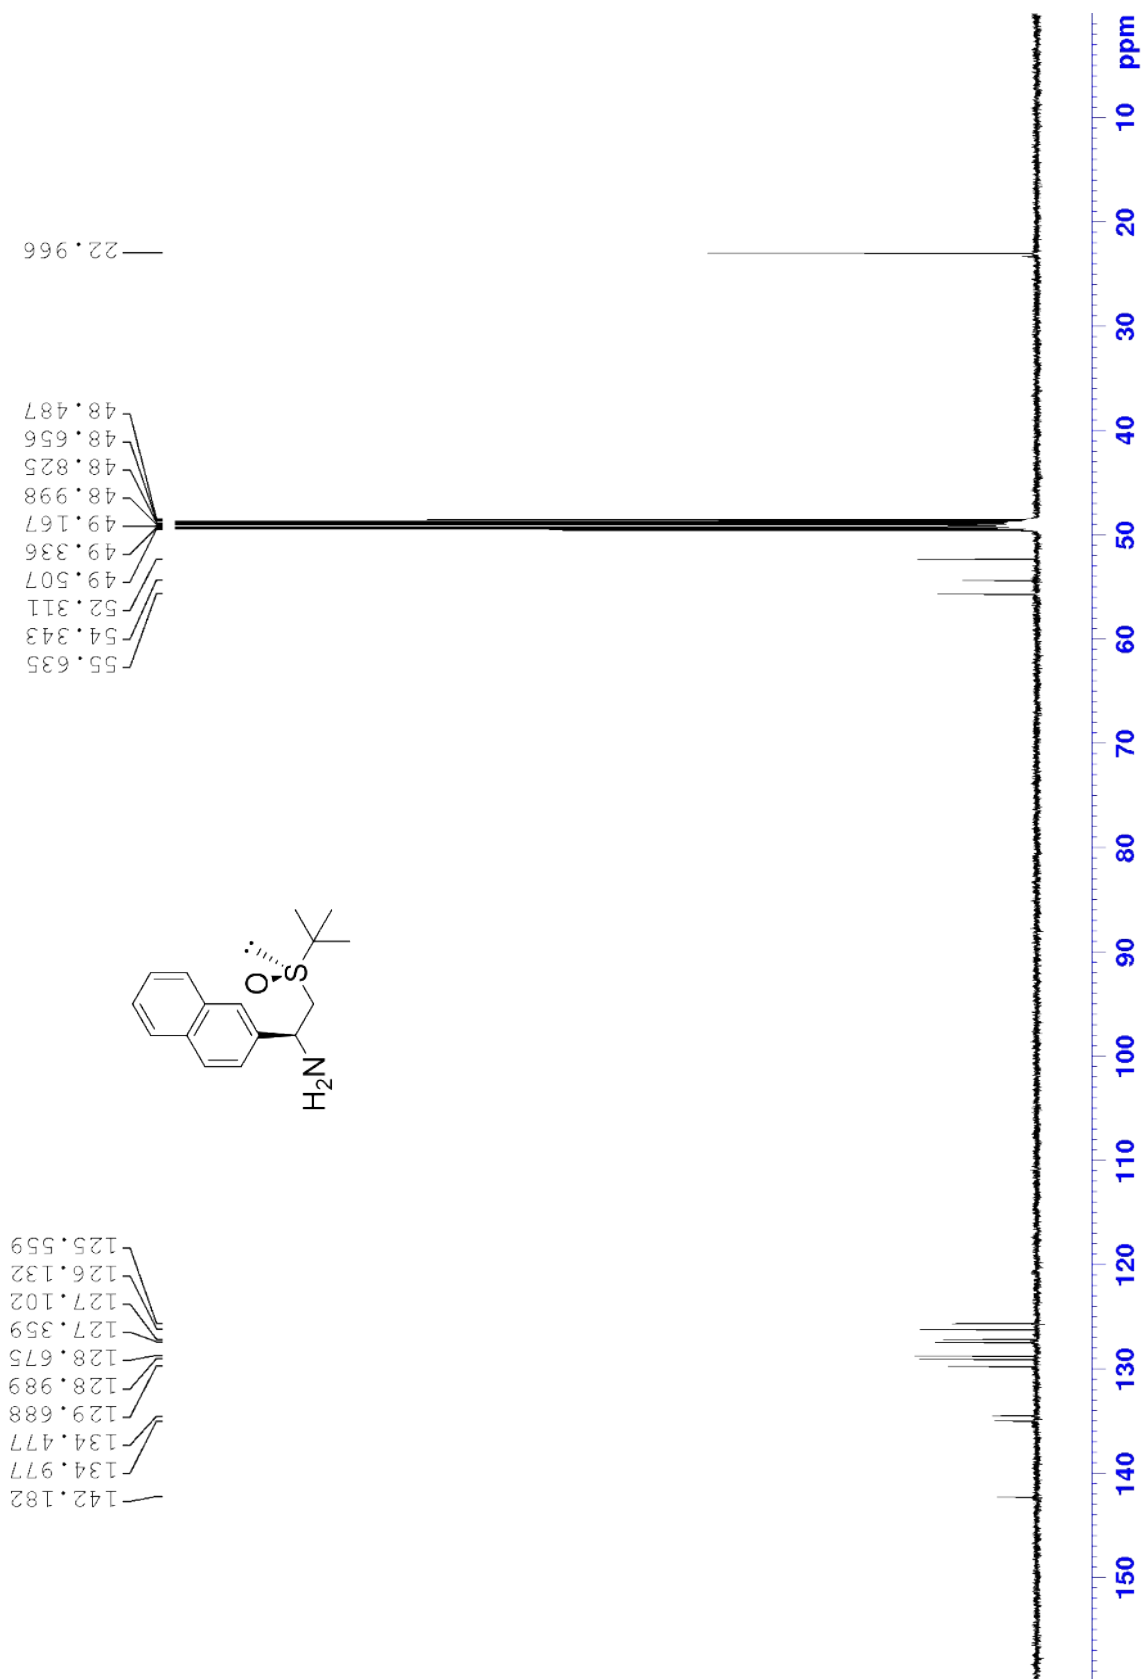



(S<sub>C</sub>S<sub>S</sub>)- 1-(2-Naphthyl)-2-(tert-butylsulfinyl)ethylamine, **24**(S<sub>C</sub>S<sub>S</sub>)

<sup>1</sup>H-NMR (500 MHz, MeOD)

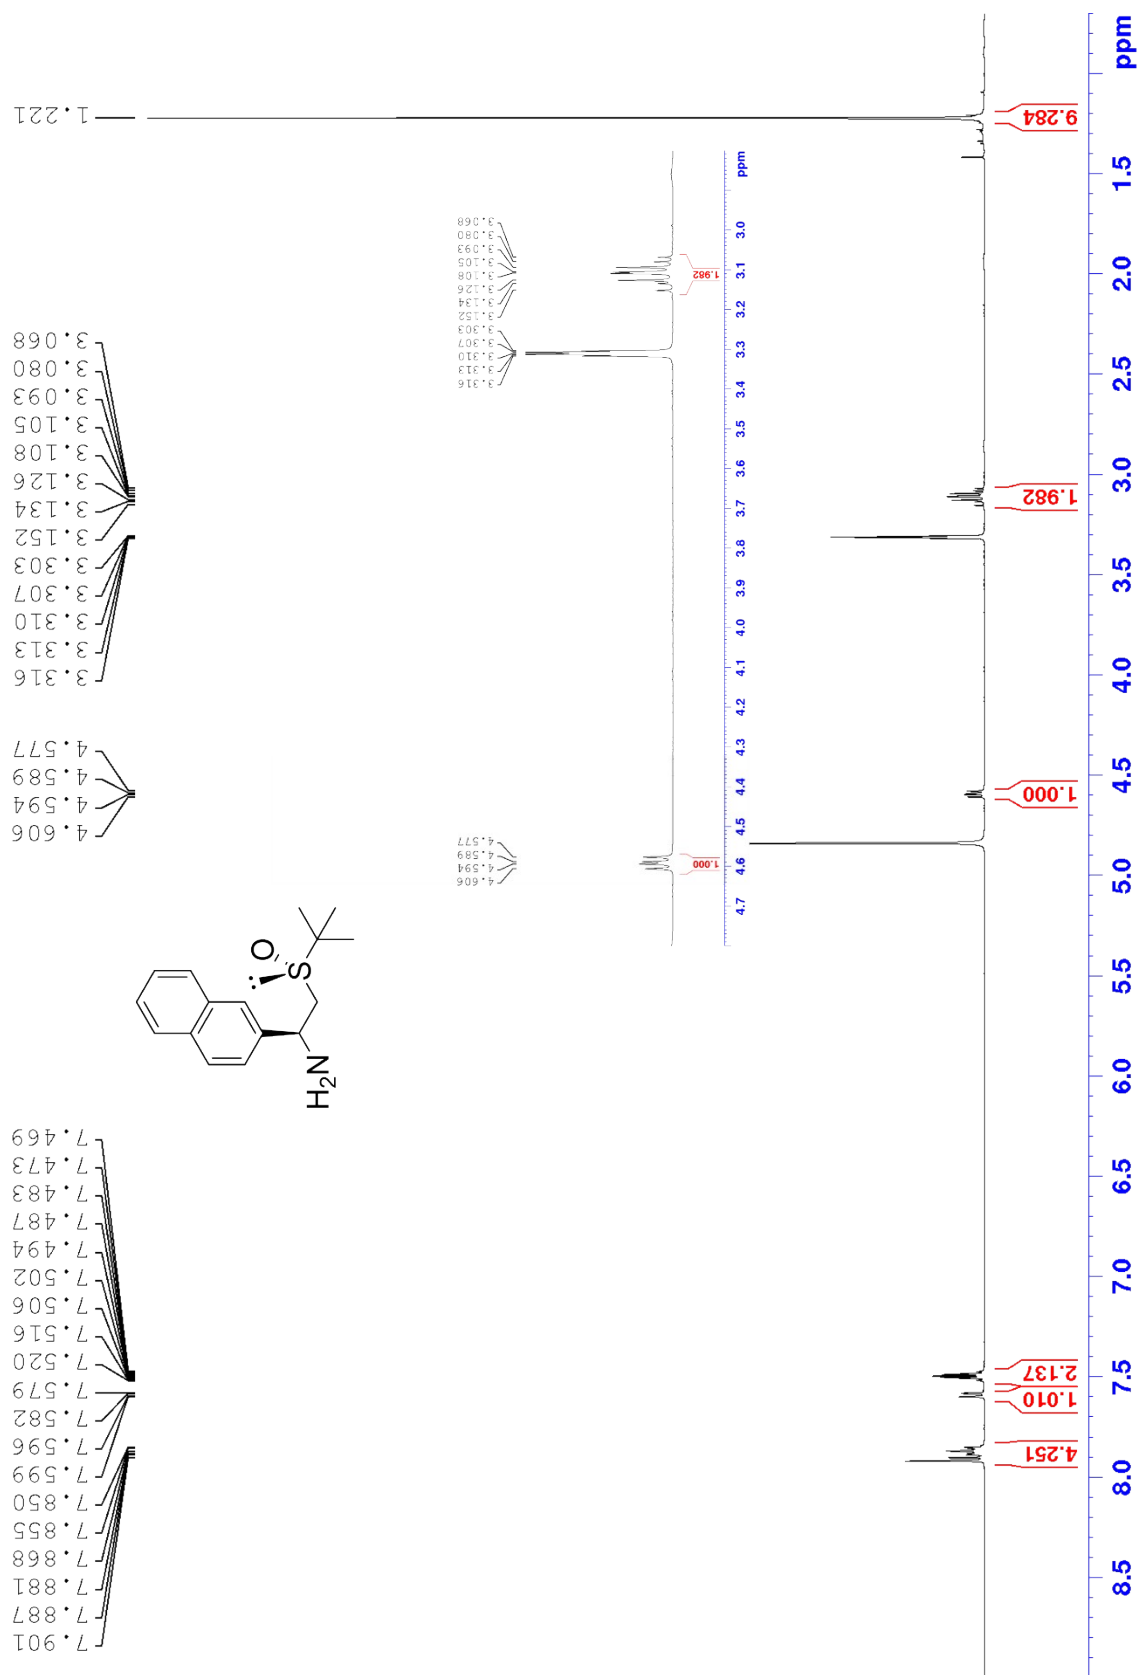

<sup>13</sup>C-NMR (500 MHz, MeOD)

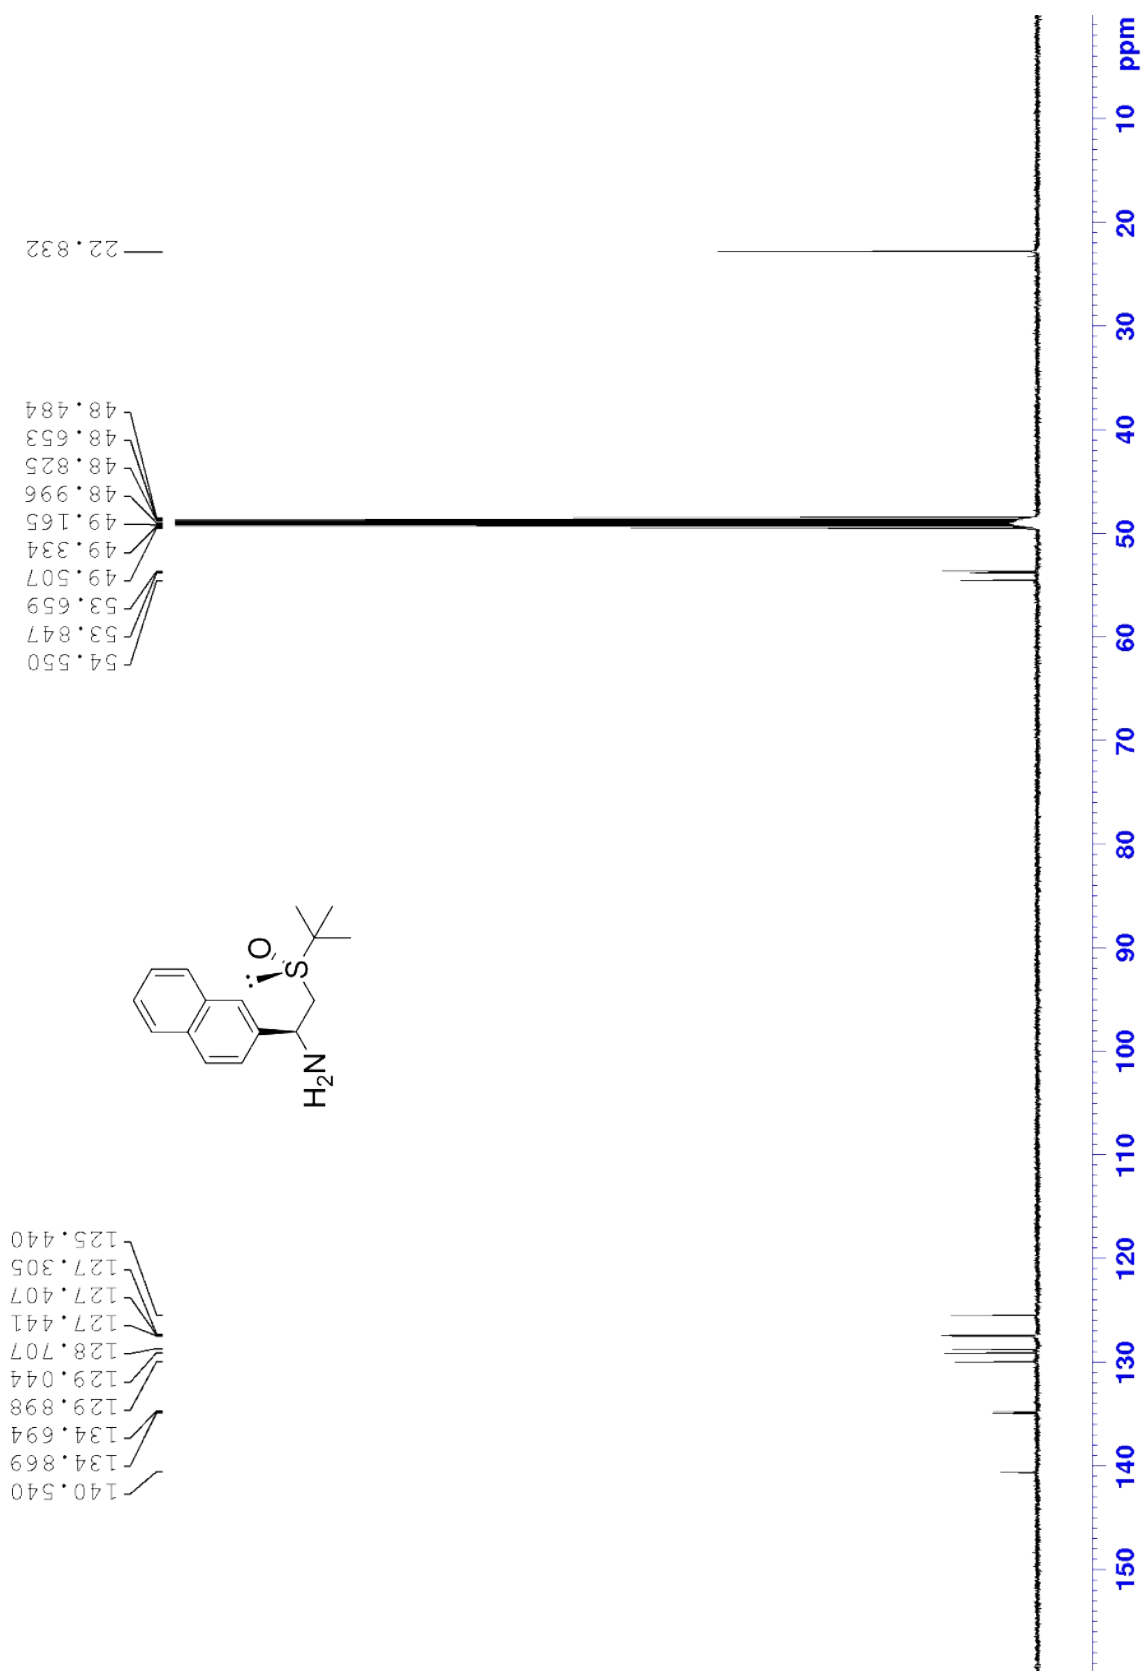

*(S<sub>C</sub>S<sub>S</sub>)-N-Acetyl-1-phenyl-2-(phenylsulfinyl)ethylamine, 25(S<sub>C</sub>S<sub>S</sub>)*

<sup>1</sup>H-NMR (500 MHz, CDCl<sub>3</sub>)

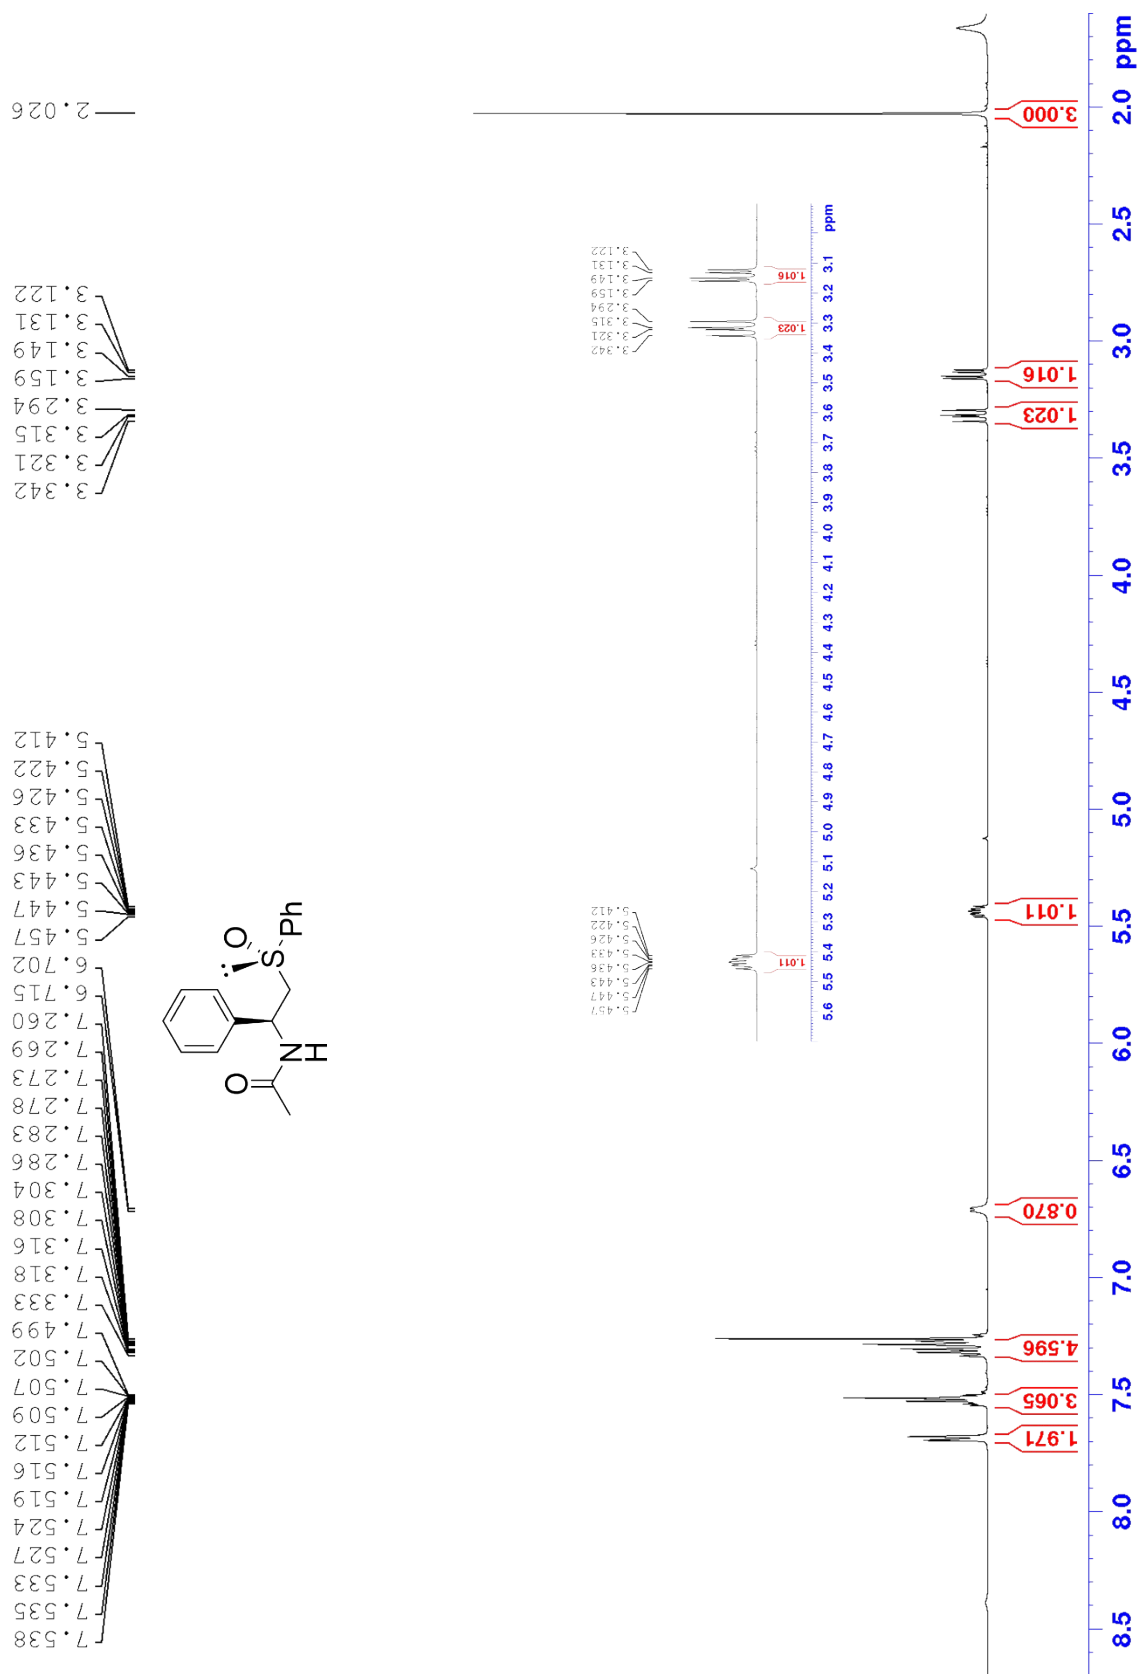

$^{13}\text{C}$ -NMR (500 MHz,  $\text{CDCl}_3$ )

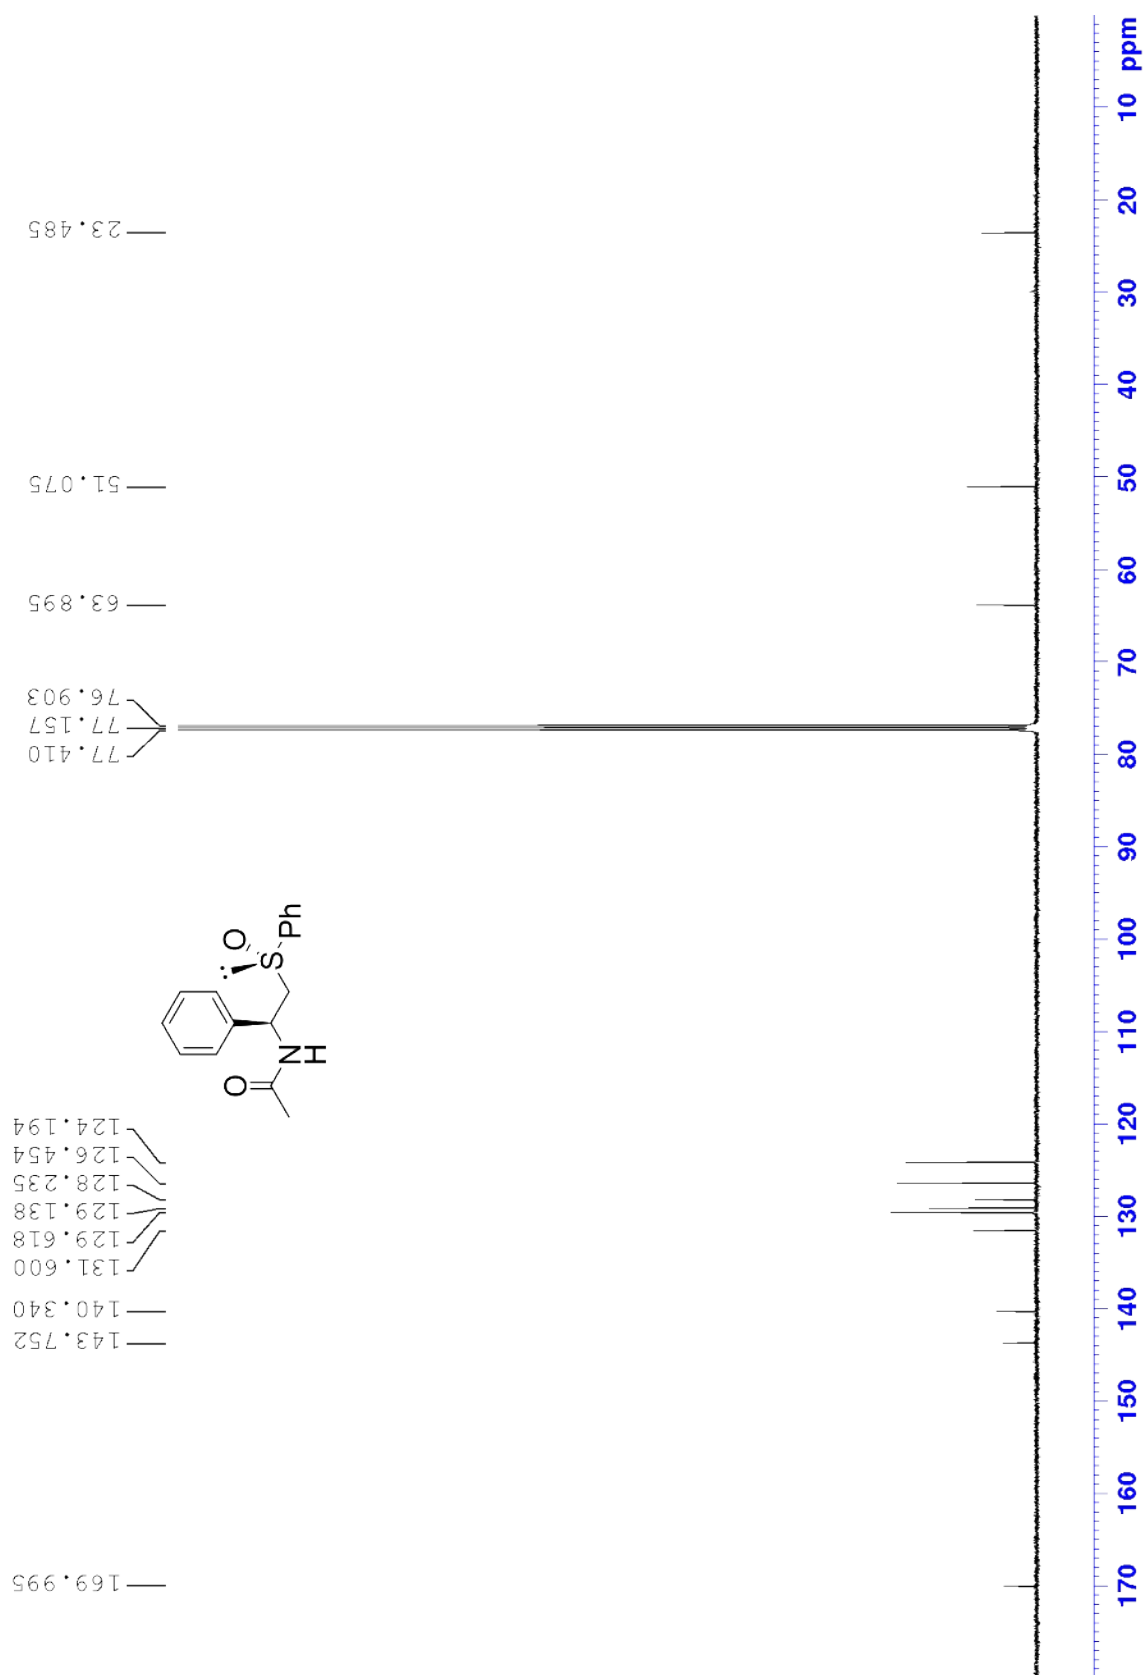

*(S<sub>C</sub>R<sub>S</sub>)-N-Acetyl-1-(Phenylsulfinyl)-3-methylbut-2-ylamine, 26(S<sub>C</sub>R<sub>S</sub>)*

<sup>1</sup>H-NMR (500 MHz, CDCl<sub>3</sub>)

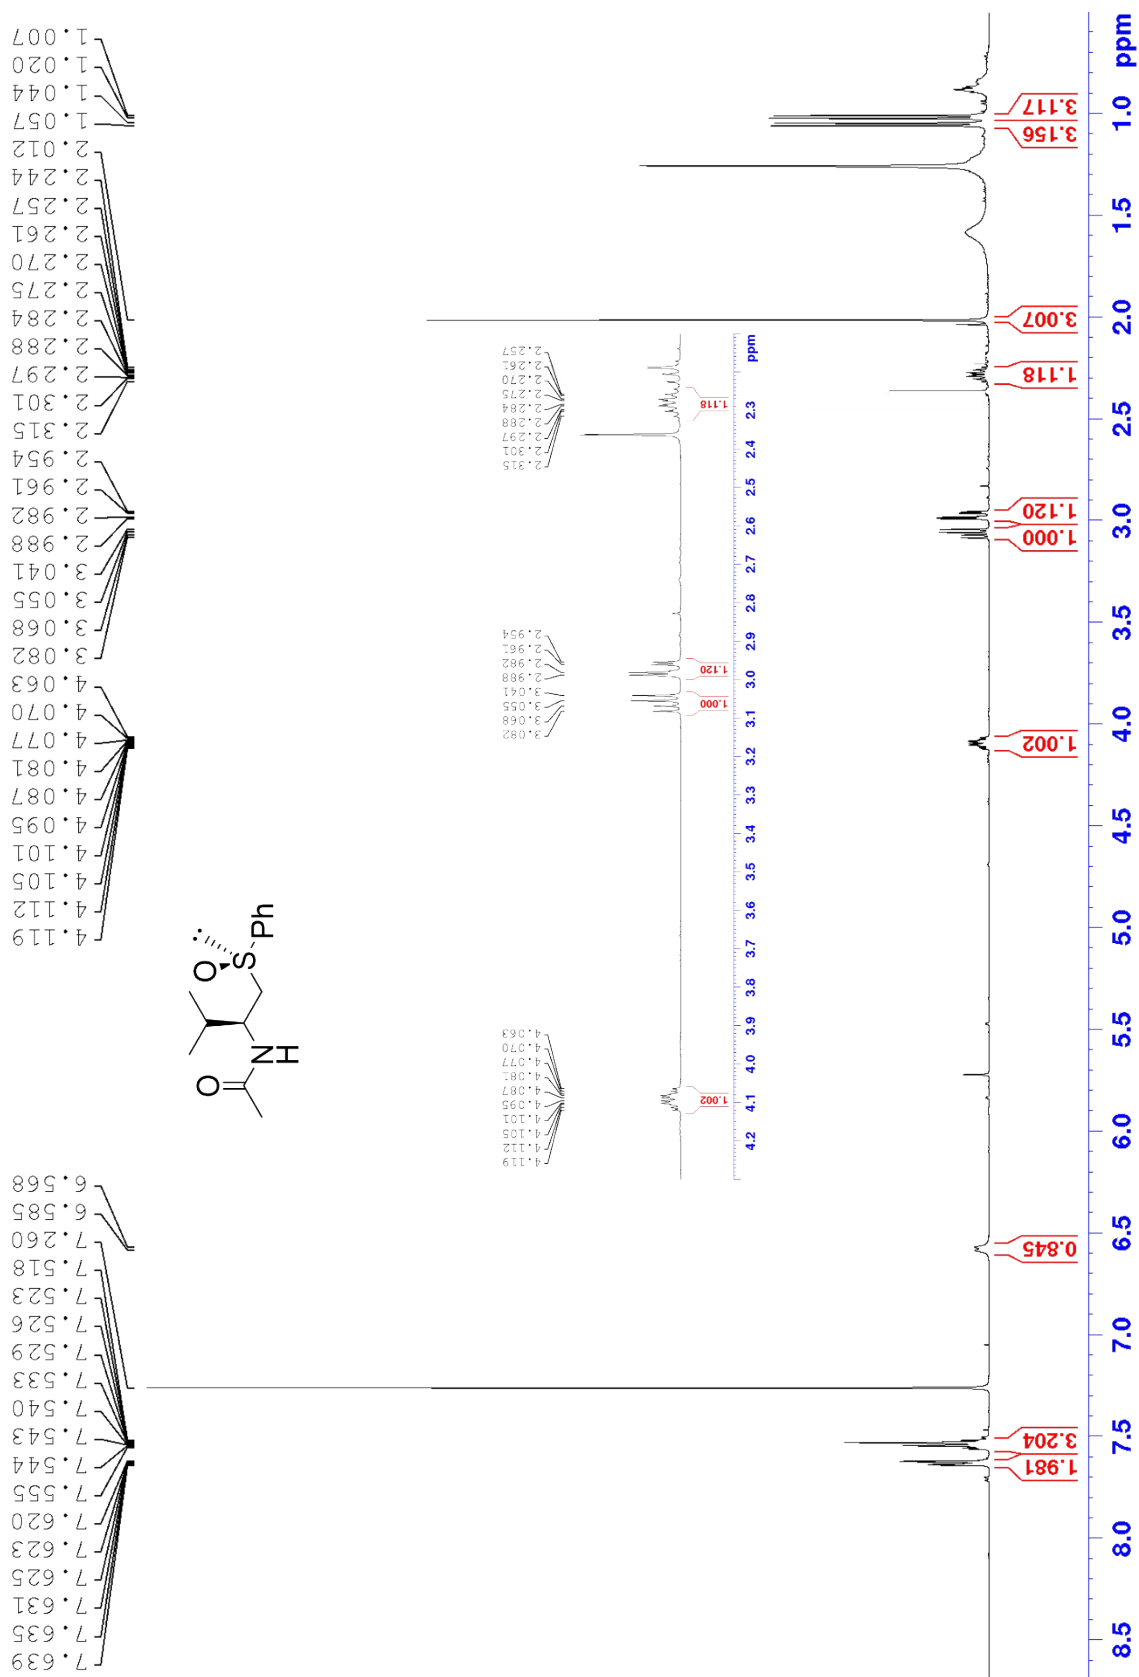

$^{13}\text{C-NMR}$  (500 MHz,  $\text{CDCl}_3$ )

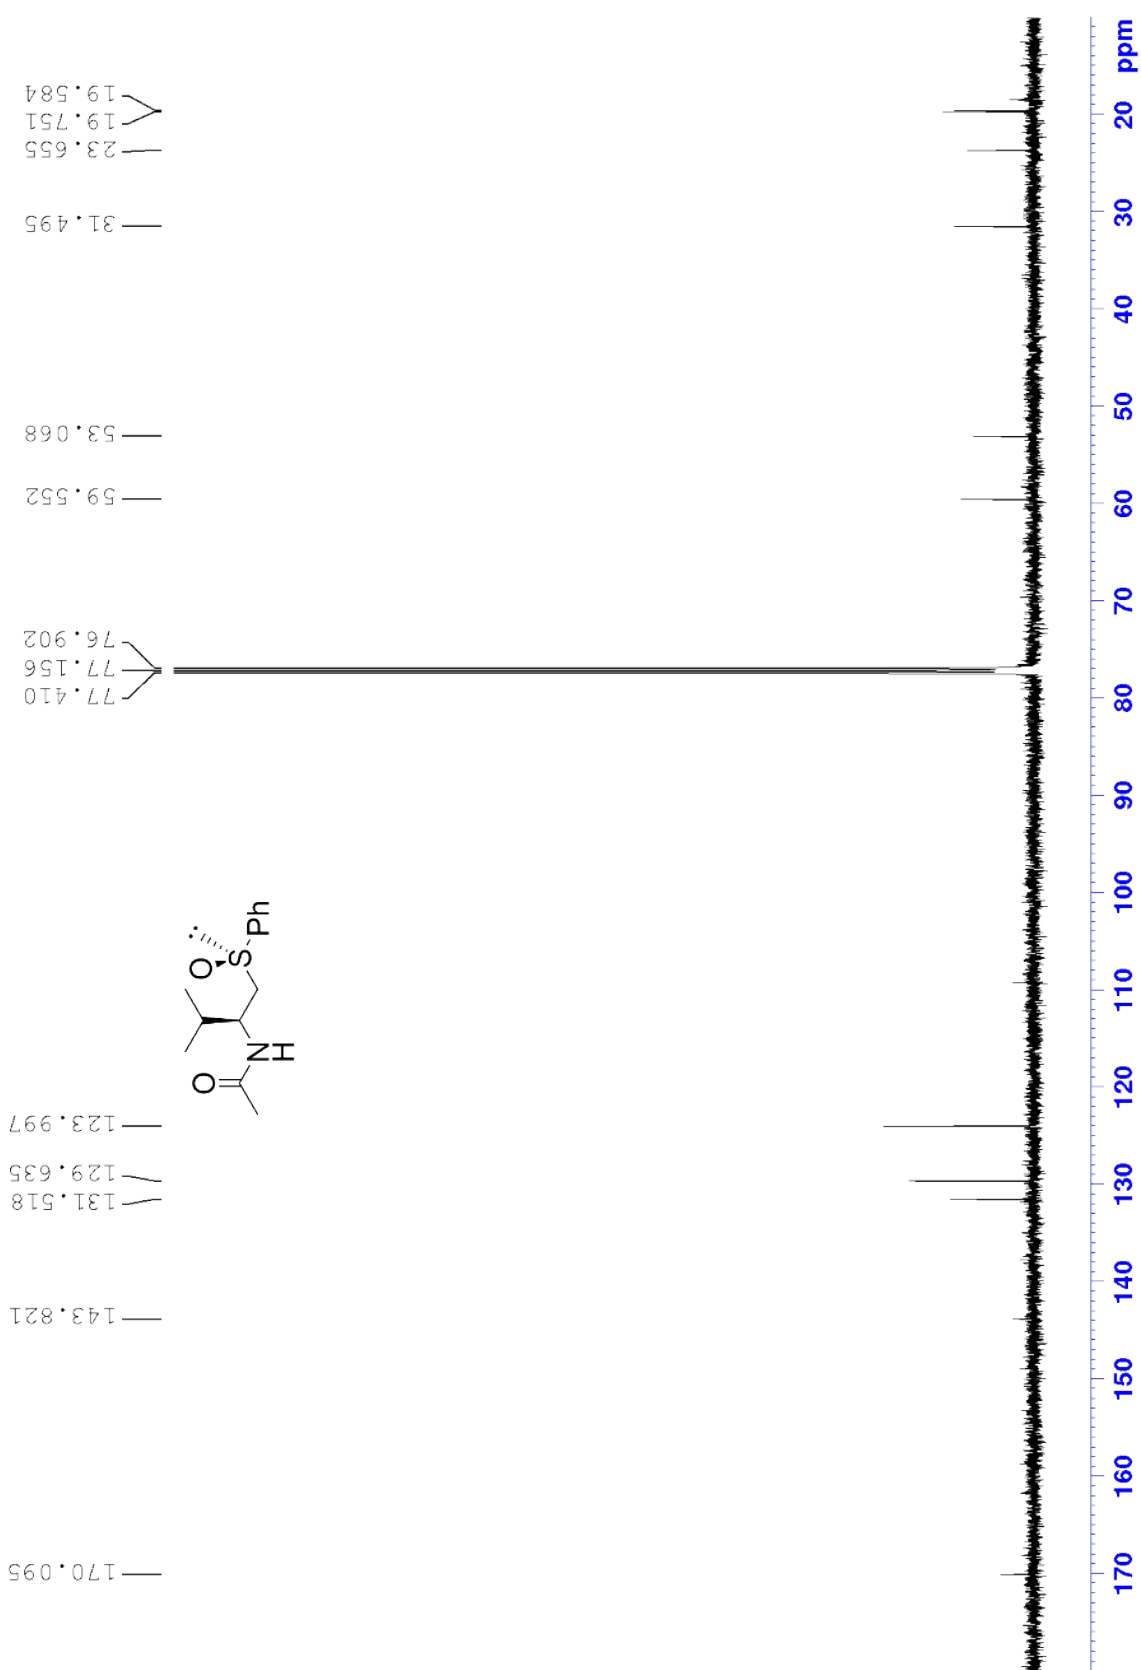

*(S<sub>C</sub>R<sub>S</sub>)-N-Acetyl-1-(2-naphthyl)-2-(tert-butylsulfinyl)ethylamine, 27(S<sub>C</sub>R<sub>S</sub>)*

<sup>1</sup>H-NMR (500 MHz, CDCl<sub>3</sub>)

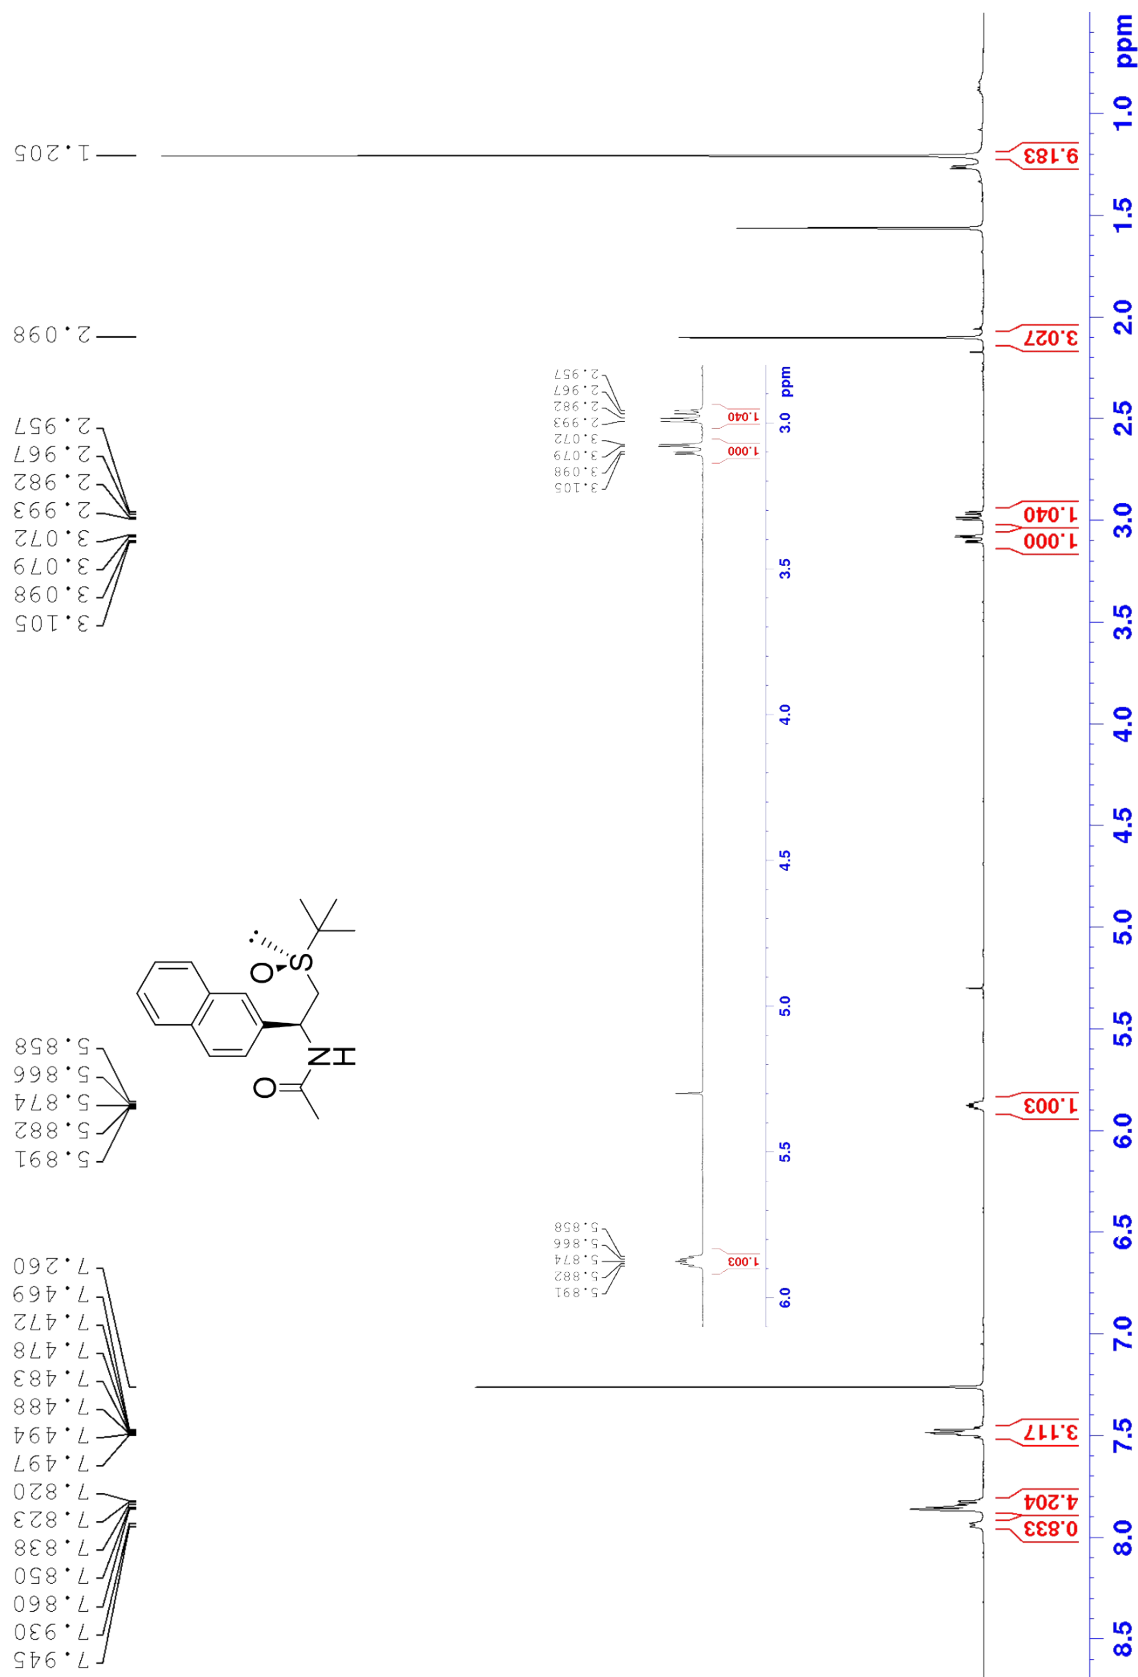

$^{13}\text{C}$ -NMR (500 MHz,  $\text{CDCl}_3$ )

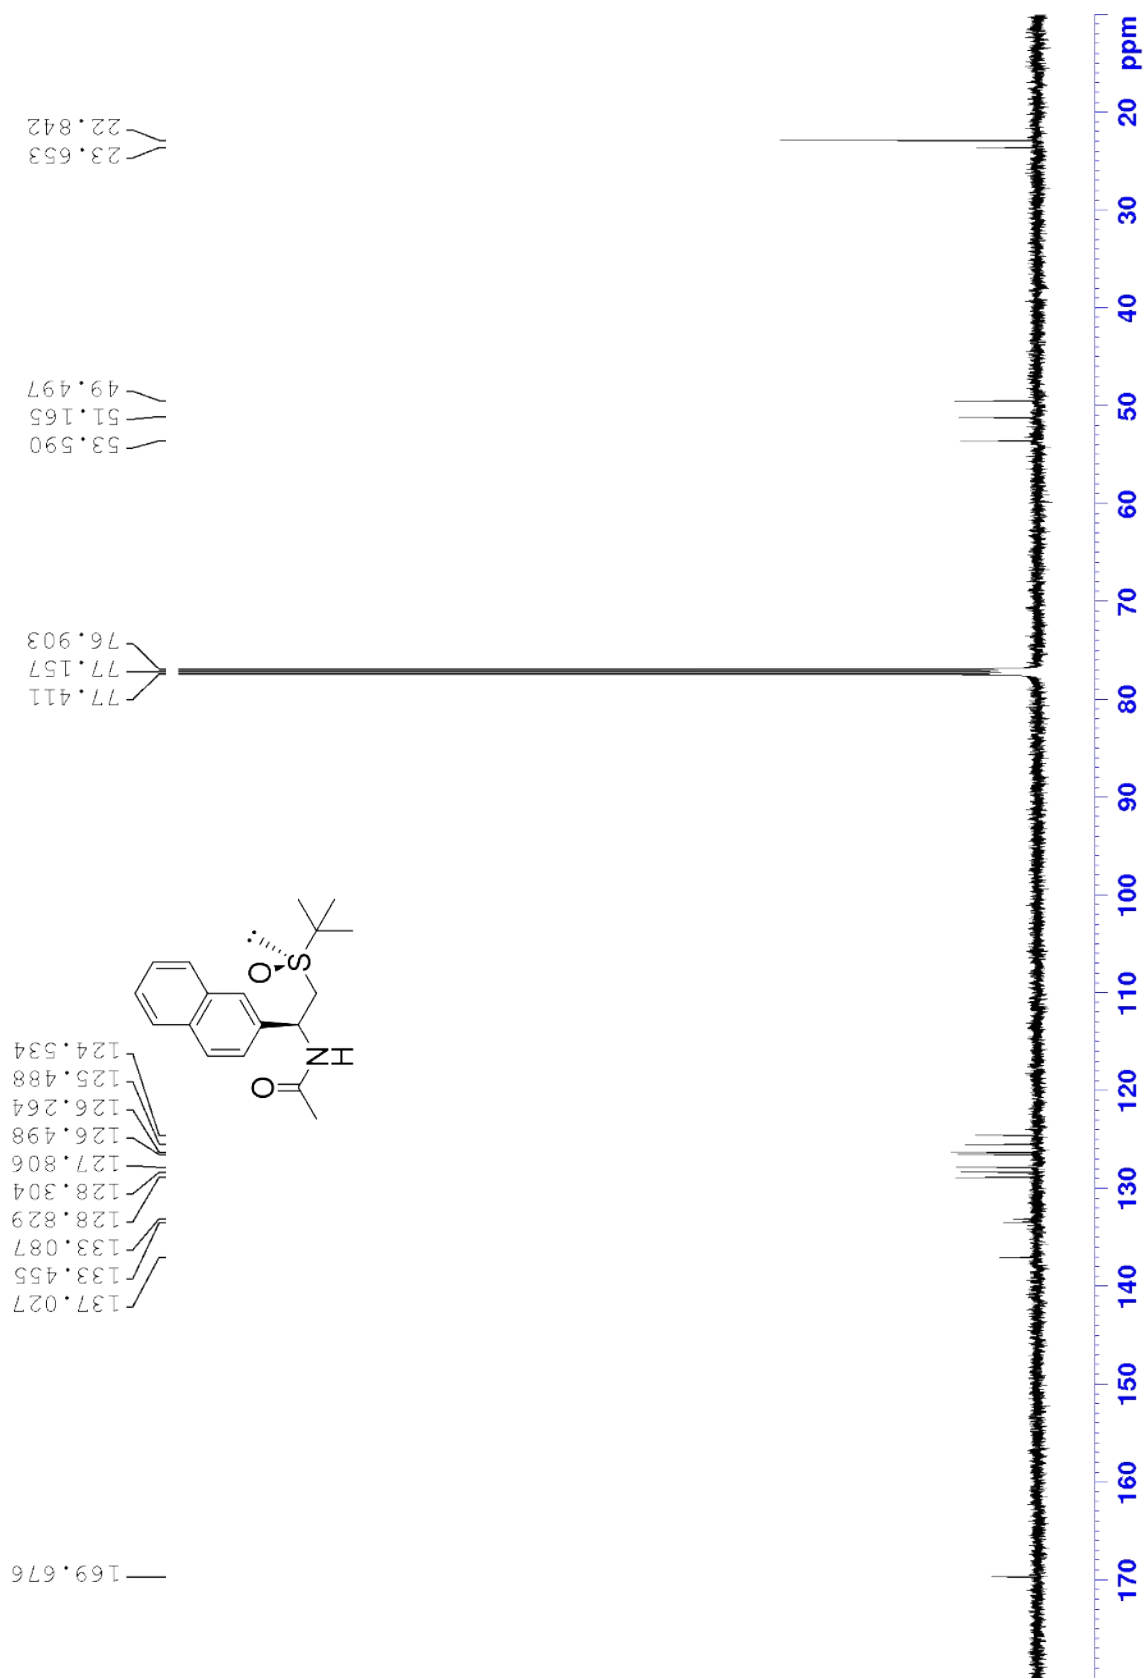



*(S<sub>C</sub>S<sub>S</sub>)-N-Acetyl-1-(2-naphthyl)-2-(tert-butylsulfinyl)ethylamine, 27(S<sub>C</sub>S<sub>S</sub>)*

<sup>1</sup>H-NMR (500 MHz, CDCl<sub>3</sub>)

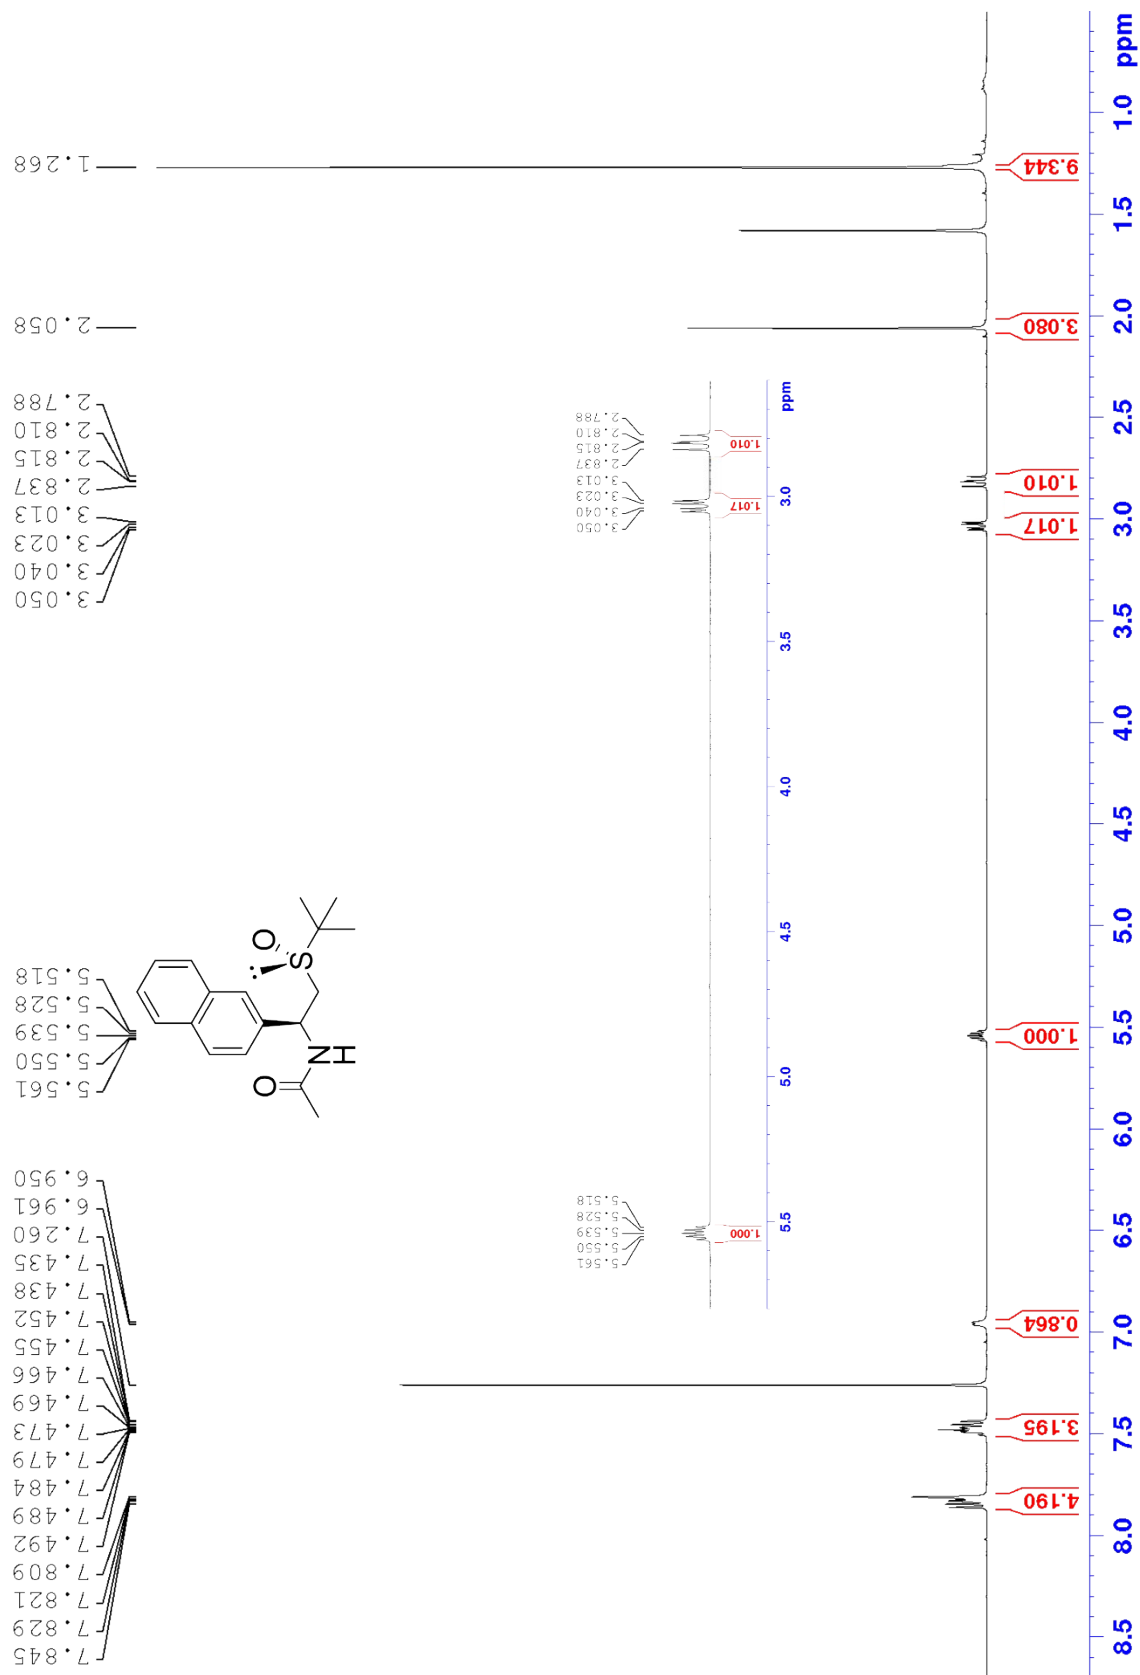

$^{13}\text{C}$ -NMR (500 MHz,  $\text{CDCl}_3$ )

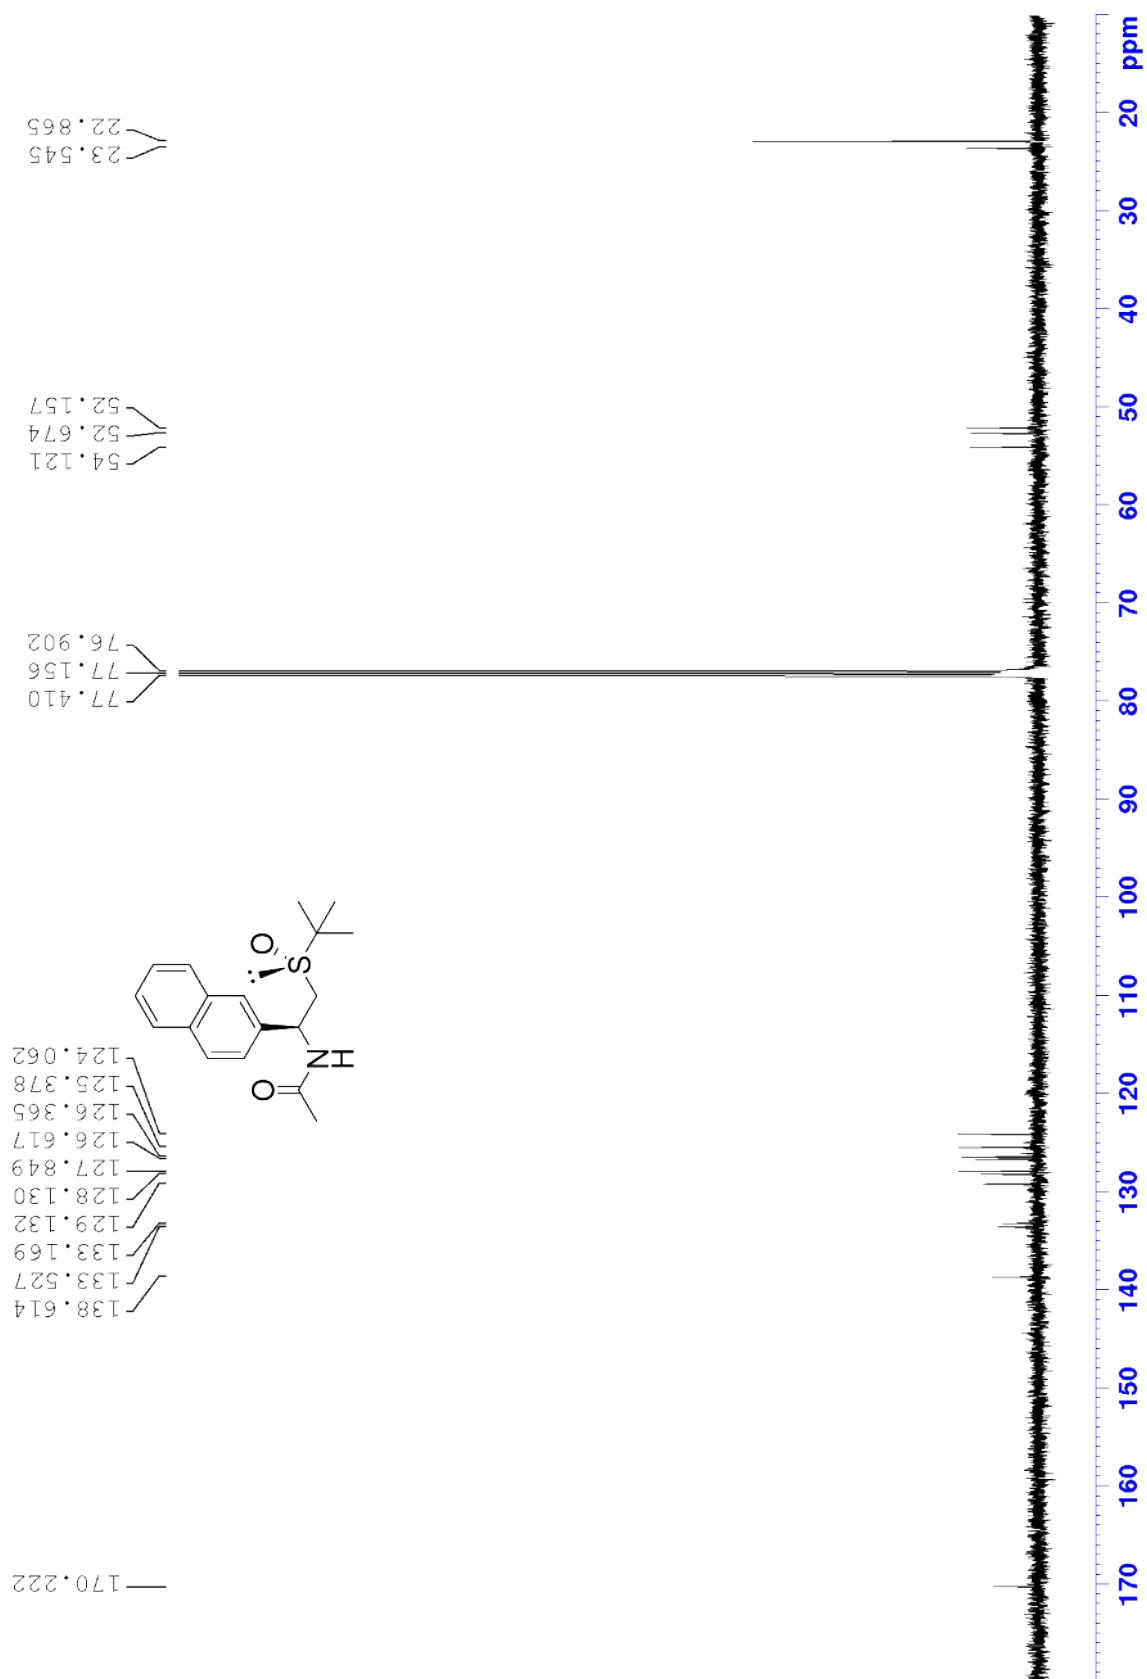

*N*-(2,3,4,5,6-pentafluorophenyl)-cyclopropanecarboxamide, **32**

$^1\text{H-NMR}$  (300 MHz,  $\text{CDCl}_3$ )

1.659  
1.644  
1.633  
1.618  
1.603  
1.592  
1.577  
1.163  
1.147  
1.138  
1.133  
1.123  
1.111  
0.976  
0.964  
0.954  
0.951  
0.938

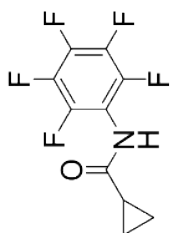

7.260  
6.900

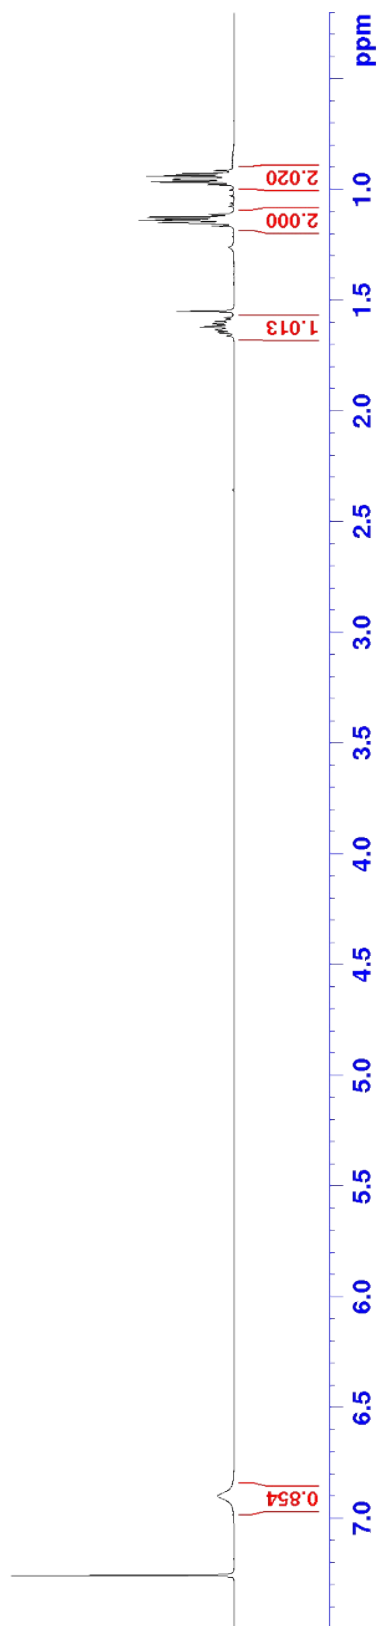

(1*R*,2*S*)-*N*-(2,3,4,5-pentafluorophenyl)-2-(*p*-tolyl)cyclopropane-1-carboxamide, **34**(1*R*,2*S*)

<sup>1</sup>H-NMR (500 MHz, CDCl<sub>3</sub>)

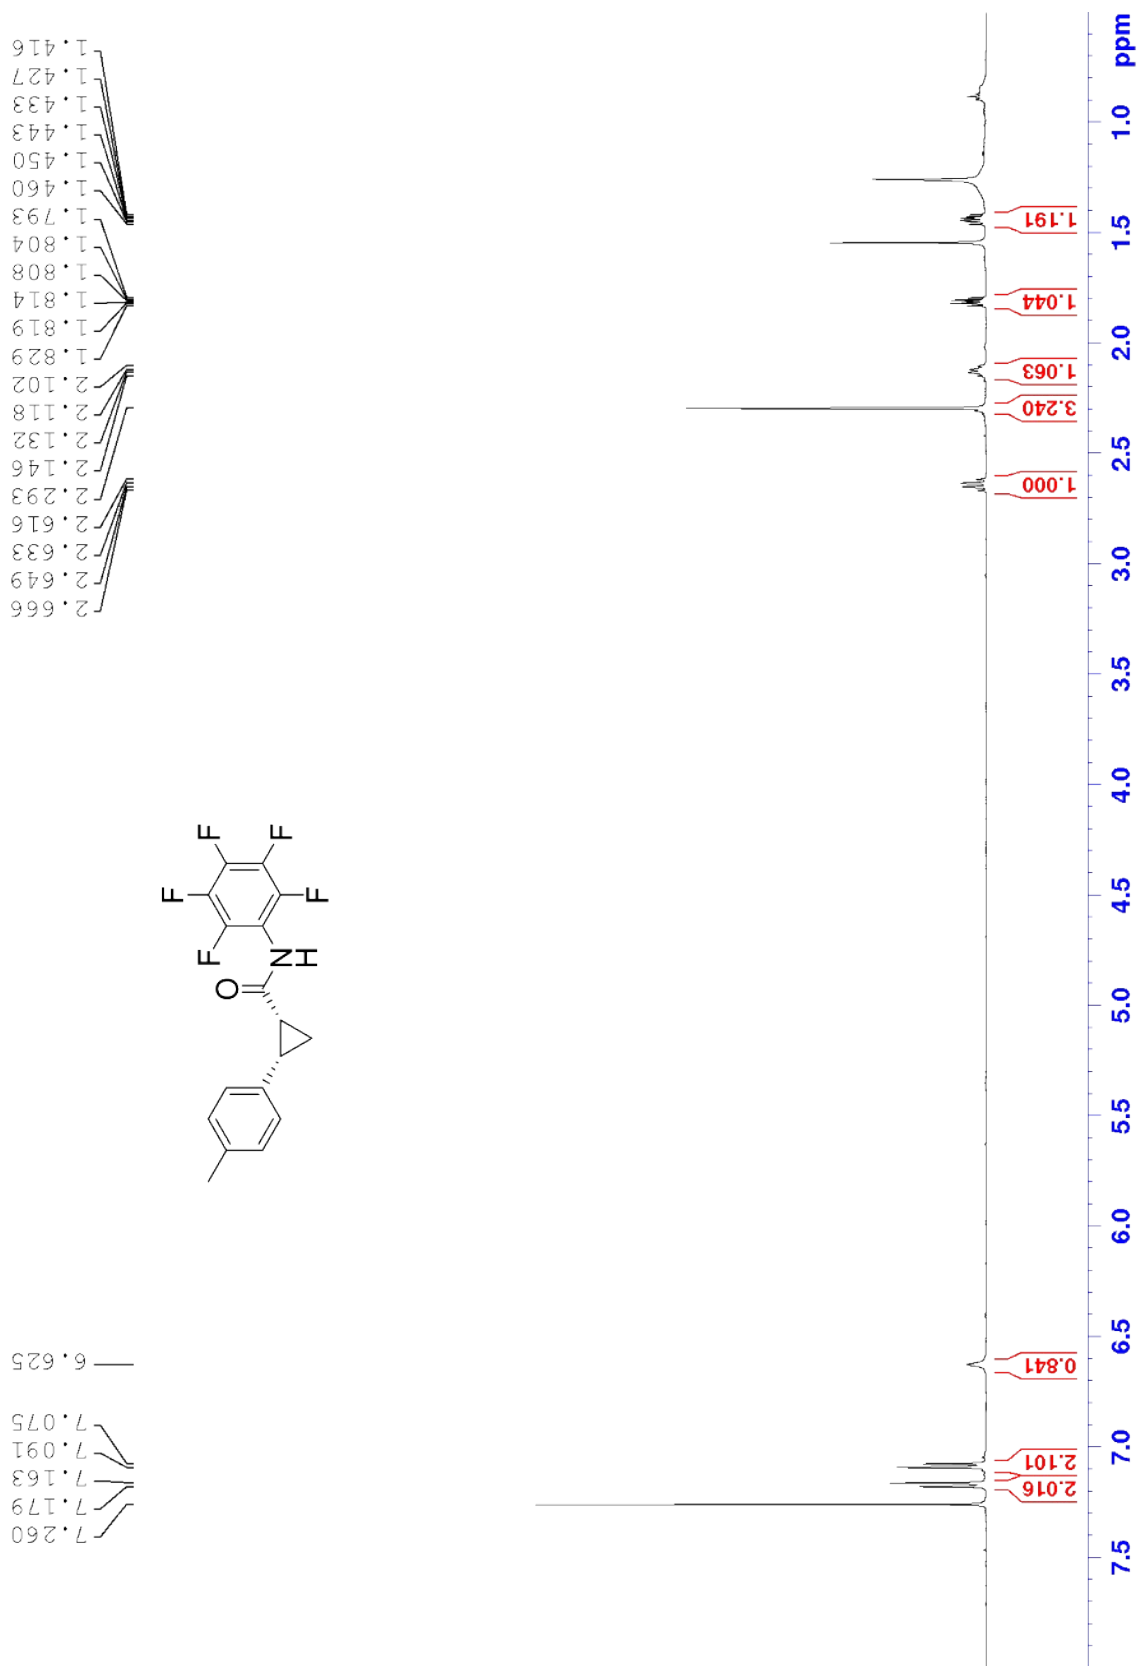

$^{13}\text{C}$ -NMR (500 MHz,  $\text{CDCl}_3$ )

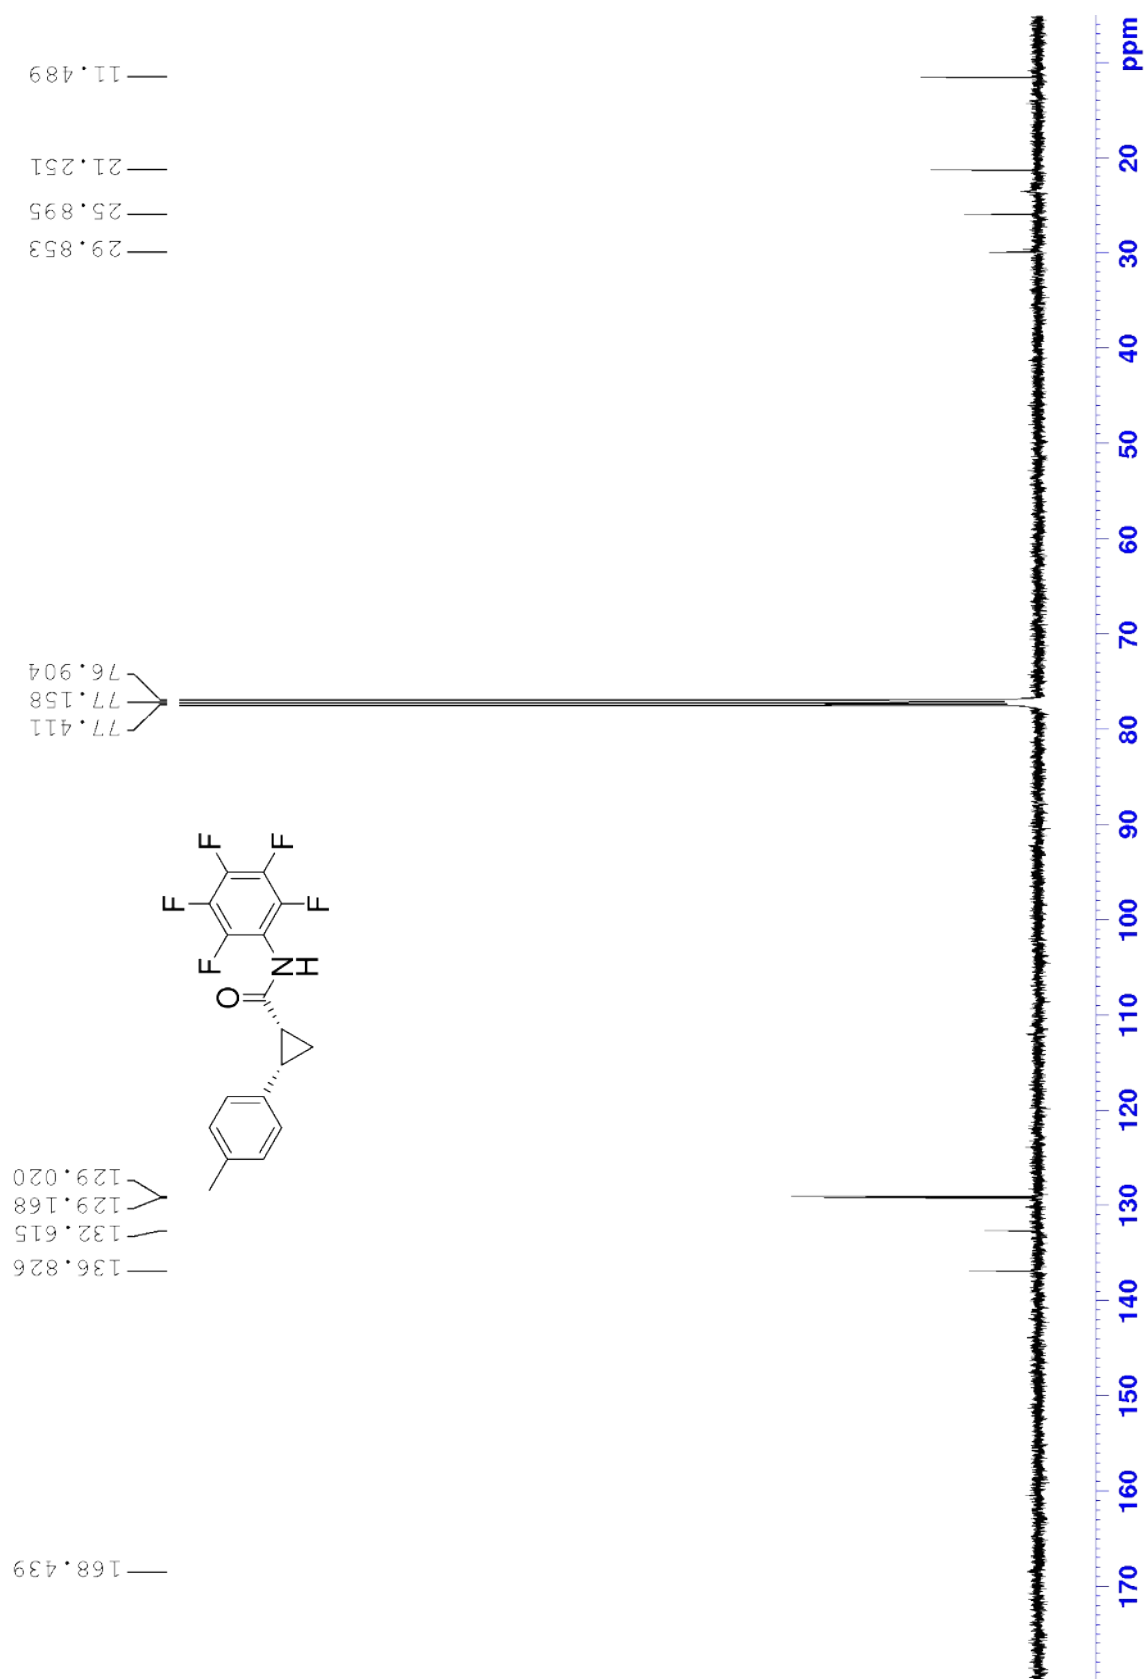

## X-ray Structural Analysis for the compounds of this work.

A summary of the crystallographic data and the structure refinement results for compounds **7**( $R_S, S_C, R_S$ ), **7**( $R_S, S_C, S_S$ ), **8**( $R_S, S_C, R_S$ ), **8**( $R_S, S_C, S_S$ ), **9**( $R_S, S_C, R_S$ ), **10**( $R_S, S_C, R_S$ ), **10**( $R_S, S_C, S_S$ ), **11**( $R_S, S_C, R_S$ ), **12**( $R_S, S_C, R_S$ ), **13**( $S_C, R_S$ ), **13**( $S_C, S_S$ ), **14**( $S_C, R_S$ ), **15**( $S_C, R_S$ ), **16**( $S_C, R_S$ ), **17**( $S_C, S_S$ ), **18**( $S_C, S_S$ ) and **21**( $R_S, S_C$ ) are given in **Tables S1-S17**. Crystals of suitable size for X-ray diffraction analysis were coated with dry perfluoropolyether and mounted on glass fibers and fixed in a cold nitrogen stream ( $T = 213$  K) to the goniometer head. Data collection was carried out on a Bruker-Nonius X8kappa APEX II CCD area detector or a Bruker-AXS, D8 QUEST ECO, PHOTON II area detector diffractometer, using monochromatic radiation  $\lambda(\text{Mo K}\alpha) = 0.71073$  Å, by means of  $\omega$  and  $\phi$  scans with a width of 0.50 degrees. The data were reduced (SAINT)<sup>5</sup> and corrected for absorption effects by the multi-scan method (SADABS)<sup>5,6</sup>. The structures were solved by direct methods (SIR-2002)<sup>7</sup> and refined against all F2 data by full-matrix least-squares techniques (SHELXTL-2016/16 or 2018/3)<sup>8,9</sup> minimizing  $w[\text{Fo}^2 - \text{Fc}^2]^2$ . All non-hydrogen atoms were refined anisotropically. Hydrogen atoms were included from calculated positions and refined riding on their respective carbon atoms with isotropic displacement parameters. A search for solvent accessible voids for the crystal structures **7**( $R_S, S_C, R_S$ ), **8**( $R_S, S_C, R_S$ ) and **10**( $R_S, S_C, R_S$ ) using SQUEEZE<sup>10</sup> showed four small volumes of potential solvents whose solvent content could not be identified or refined with the most severe restraints. The corresponding CIF data represent SQUEEZE treated structures with the solvent molecules handling as a diffuse contribution to the overall scattering, without specific atom position and excluded from the structural model. The SQUEEZE results were appended to the CIF. CCDC 1912692 [**7**( $R_S, S_C, R_S$ )], 2261905 [**7**( $R_S, S_C, S_S$ )], 1912693 [**8**( $R_S, S_C, R_S$ )], 2261906 [**8**( $R_S, S_C, S_S$ )], 1912694 [**9**( $R_S, S_C, R_S$ )], 1912695 [**10**( $R_S, S_C, R_S$ )], 2261907 [**10**( $R_S, S_C, S_S$ )], 2261908 [**11**( $R_S, S_C, R_S$ )], 2261909 [**12**( $R_S, S_C, R_S$ )], 2261910 [**13**( $S_C, R_S$ )], 2261911 [**13**( $S_C, S_S$ )], 2261912 [**14**( $S_C, R_S$ )], 2261913 [**15**( $S_C, R_S$ )], 2261914 [**16**( $S_C, R_S$ )], 2261915 [**17**( $S_C, S_S$ )], 2261916 [**18**( $S_C, S_S$ )] and 2261917 [**21**( $R_S, S_C$ )] contain the supplementary crystallographic data for this paper. The data can be obtained free of charge via: <https://www.ccdc.cam.ac.uk/structures/>.

## X-ray structure determination of selected ligands

(*R<sub>S</sub>,S<sub>C</sub>,R<sub>S</sub>*)-*N*-[1-(2-Naphthyl)-2-(phenylsulfinyl)ethyl]-2-methyl-2-propanesulfonamide, **7**(*R<sub>S</sub>,S<sub>C</sub>,R<sub>S</sub>*)

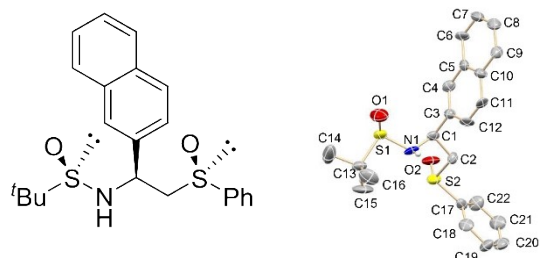

**Table S1. Crystal data and structure refinement for 7(*R<sub>S</sub>,S<sub>C</sub>,R<sub>S</sub>*).**

|                                 |                                                                |          |
|---------------------------------|----------------------------------------------------------------|----------|
| Empirical formula               | C <sub>22</sub> H <sub>25</sub> NO <sub>2</sub> S <sub>2</sub> |          |
| Formula weight                  | 399.55                                                         |          |
| Temperature                     | 193(2) K                                                       |          |
| Wavelength                      | 0.71073 Å                                                      |          |
| Crystal system                  | Orthorhombic                                                   |          |
| Space group                     | P2 <sub>1</sub> 2 <sub>1</sub> 2 <sub>1</sub>                  |          |
| Unit cell dimensions            | a = 5.8957(8) Å                                                | α = 90°. |
|                                 | b = 19.877(3) Å                                                | β = 90°. |
|                                 | c = 20.288(3) Å                                                | γ = 90°. |
| Volume                          | 2377.6(6) Å <sup>3</sup>                                       |          |
| Z                               | 4                                                              |          |
| Density (calculated)            | 1.116 Mg/m <sup>3</sup>                                        |          |
| Absorption coefficient          | 0.238 mm <sup>-1</sup>                                         |          |
| F(000)                          | 848                                                            |          |
| Crystal size                    | 0.500 x 0.300 x 0.050 mm <sup>3</sup>                          |          |
| Theta range for data collection | 2.008 to 25.249°.                                              |          |
| Index ranges                    | -7 ≤ h ≤ 3, -23 ≤ k ≤ 22, -24 ≤ l ≤ 22                         |          |
| Reflections collected           | 49397                                                          |          |
| Independent reflections         | 4150 [R(int) = 0.1003]                                         |          |
| Completeness to theta = 25.242° | 99.7 %                                                         |          |
| Absorption correction           | Semi-empirical from equivalents                                |          |
| Max. and min. transmission      | 0.9882 and 0.8901                                              |          |

|                                   |                                             |
|-----------------------------------|---------------------------------------------|
| Refinement method                 | Full-matrix least-squares on F <sup>2</sup> |
| Data / restraints / parameters    | 4150 / 0 / 247                              |
| Goodness-of-fit on F <sup>2</sup> | 1.136                                       |
| Final R indices [I>2σ(I)]         | R1 = 0.1133, wR2 = 0.2653                   |
| R indices (all data)              | R1 = 0.1253, wR2 = 0.2722                   |
| Absolute structure parameter      | 0.02(13)                                    |
| Extinction coefficient            | n/a                                         |
| Largest diff. peak and hole       | 0.537 and -0.574 e.Å <sup>-3</sup>          |

*(R<sub>S</sub>,S<sub>C</sub>,S<sub>S</sub>)-N-[1-(2-Naphthyl)-2-(phenylsulfinyl)ethyl]-2-methyl-2-propanesulfonamide, 7(R<sub>S</sub>,S<sub>C</sub>,S<sub>S</sub>)*

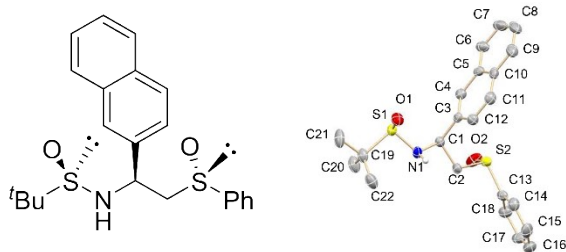

**Table S2. Crystal data and structure refinement for 7(R<sub>S</sub>,S<sub>C</sub>,S<sub>S</sub>).**

|                        |                                                                |                 |
|------------------------|----------------------------------------------------------------|-----------------|
| Empirical formula      | C <sub>22</sub> H <sub>25</sub> NO <sub>2</sub> S <sub>2</sub> |                 |
| Formula weight         | 399.55                                                         |                 |
| Temperature            | 193(2) K                                                       |                 |
| Wavelength             | 0.71073 Å                                                      |                 |
| Crystal system         | Monoclinic                                                     |                 |
| Space group            | P2 <sub>1</sub>                                                |                 |
| Unit cell dimensions   | a = 5.8356(4) Å                                                | α = 90°.        |
|                        | b = 19.1473(11) Å                                              | β = 98.968(4)°. |
|                        | c = 9.4506(7) Å                                                | γ = 90°.        |
| Volume                 | 1043.06(12) Å <sup>3</sup>                                     |                 |
| Z                      | 2                                                              |                 |
| Density (calculated)   | 1.272 Mg/m <sup>3</sup>                                        |                 |
| Absorption coefficient | 0.272 mm <sup>-1</sup>                                         |                 |
| F(000)                 | 424                                                            |                 |
| Crystal size           | 0.500 x 0.150 x 0.100 mm <sup>3</sup>                          |                 |



|                                   |                                             |
|-----------------------------------|---------------------------------------------|
| Theta range for data collection   | 2.127 to 30.805°.                           |
| Index ranges                      | -8<=h<=8, -27<=k<=27, -13<=l<=13            |
| Reflections collected             | 21111                                       |
| Independent reflections           | 5592 [R(int) = 0.1048]                      |
| Completeness to theta = 25.242°   | 99.2 %                                      |
| Absorption correction             | Semi-empirical from equivalents             |
| Max. and min. transmission        | 0.7461 and 0.5196                           |
| Refinement method                 | Full-matrix least-squares on F <sup>2</sup> |
| Data / restraints / parameters    | 5592 / 1 / 247                              |
| Goodness-of-fit on F <sup>2</sup> | 1.149                                       |
| Final R indices [I>2sigma(I)]     | R1 = 0.0734, wR2 = 0.1251                   |
| R indices (all data)              | R1 = 0.1072, wR2 = 0.1377                   |
| Absolute structure parameter      | 0.01(7)                                     |
| Extinction coefficient            | n/a                                         |
| Largest diff. peak and hole       | 0.393 and -0.432 e.Å <sup>-3</sup>          |

*(R<sub>S</sub>,S<sub>C</sub>,R<sub>S</sub>)-N-[1-Phenyl-2-(phenylsulfinyl)ethyl]-2-methyl-2-propanesulfonamide, 8(R<sub>S</sub>,S<sub>C</sub>,R<sub>S</sub>)*

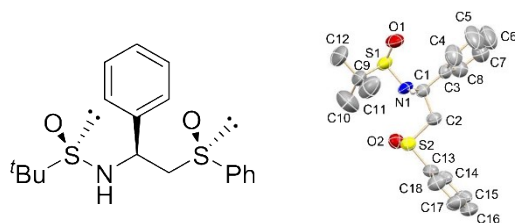

**Table S3. Crystal data and structure refinement for 8(R<sub>S</sub>,S<sub>C</sub>,R<sub>S</sub>).**

|                      |                                                                |           |
|----------------------|----------------------------------------------------------------|-----------|
| Empirical formula    | C <sub>18</sub> H <sub>25</sub> NO <sub>3</sub> S <sub>2</sub> |           |
| Formula weight       | 367.51                                                         |           |
| Temperature          | 193(2) K                                                       |           |
| Wavelength           | 0.71073 Å                                                      |           |
| Crystal system       | Hexagonal                                                      |           |
| Space group          | P6 <sub>1</sub>                                                |           |
| Unit cell dimensions | a = 14.1201(3) Å                                               | α = 90°.  |
|                      | b = 14.1201(3) Å                                               | β = 90°.  |
|                      | c = 19.4225(6) Å                                               | γ = 120°. |
| Volume               | 3353.60(18) Å <sup>3</sup>                                     |           |

|                                   |                                             |
|-----------------------------------|---------------------------------------------|
| Z                                 | 6                                           |
| Density (calculated)              | 1.092 Mg/m <sup>3</sup>                     |
| Absorption coefficient            | 0.251 mm <sup>-1</sup>                      |
| F(000)                            | 1176                                        |
| Crystal size                      | 0.500 x 0.200 x 0.150 mm <sup>3</sup>       |
| Theta range for data collection   | 1.665 to 25.248°.                           |
| Index ranges                      | -16<=h<=16, -14<=k<=16, -14<=l<=23          |
| Reflections collected             | 29542                                       |
| Independent reflections           | 3288 [R(int) = 0.0773]                      |
| Completeness to theta = 25.242°   | 99.8 %                                      |
| Absorption correction             | Semi-empirical from equivalent              |
| Max. and min. transmission        | 0.9633 and 0.8847                           |
| Refinement method                 | Full-matrix least-squares on F <sup>2</sup> |
| Data / restraints / parameters    | 3288 / 122 / 229                            |
| Goodness-of-fit on F <sup>2</sup> | 1.039                                       |
| Final R indices [I>2sigma(I)]     | R1 = 0.0631, wR2 = 0.1643                   |
| R indices (all data)              | R1 = 0.0754, wR2 = 0.1736                   |
| Absolute structure parameter      | 0.10(7)                                     |
| Extinction coefficient            | n/a                                         |
| Largest diff. peak and hole       | 0.255 and -0.215 e.Å <sup>-3</sup>          |

*(R<sub>S</sub>,S<sub>C</sub>,S<sub>S</sub>)-N-[1-Phenyl-2-(phenylsulfinyl)ethyl]-2-methyl-2-propanesulfonamide, 8(R<sub>S</sub>,S<sub>C</sub>,S<sub>S</sub>)*

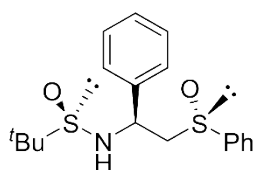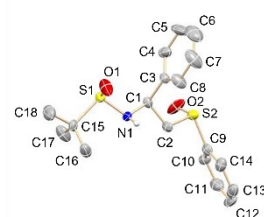

**Table S4. Crystal data and structure refinement for 8(R<sub>S</sub>,S<sub>C</sub>,S<sub>S</sub>).**

|                   |                                                                |
|-------------------|----------------------------------------------------------------|
| Empirical formula | C <sub>18</sub> H <sub>23</sub> NO <sub>2</sub> S <sub>2</sub> |
| Formula weight    | 349.49                                                         |
| Temperature       | 193(2) K                                                       |
| Wavelength        | 0.71073 Å                                                      |
|                   | S114                                                           |

|                                        |                                                                                                                                                        |
|----------------------------------------|--------------------------------------------------------------------------------------------------------------------------------------------------------|
| Crystal system                         | Orthorhombic                                                                                                                                           |
| Space group                            | $P2_12_12_1$                                                                                                                                           |
| Unit cell dimensions                   | $a = 11.2150(12) \text{ \AA}$ $\alpha = 90^\circ$<br>$b = 29.247(3) \text{ \AA}$ $\beta = 90^\circ$<br>$c = 5.8198(7) \text{ \AA}$ $\gamma = 90^\circ$ |
| Volume                                 | $1908.9(4) \text{ \AA}^3$                                                                                                                              |
| Z                                      | 4                                                                                                                                                      |
| Density (calculated)                   | $1.216 \text{ Mg/m}^3$                                                                                                                                 |
| Absorption coefficient                 | $0.287 \text{ mm}^{-1}$                                                                                                                                |
| F(000)                                 | 744                                                                                                                                                    |
| Crystal size                           | $0.400 \times 0.100 \times 0.050 \text{ mm}^3$                                                                                                         |
| Theta range for data collection        | $1.945$ to $25.245^\circ$ .                                                                                                                            |
| Index ranges                           | $-13 \leq h \leq 12$ , $-35 \leq k \leq 35$ , $-6 \leq l \leq 6$                                                                                       |
| Reflections collected                  | 20320                                                                                                                                                  |
| Independent reflections                | 3435 [R(int) = 0.1131]                                                                                                                                 |
| Completeness to theta = $25.242^\circ$ | 99.9 %                                                                                                                                                 |
| Absorption correction                  | Semi-empirical from equivalents                                                                                                                        |
| Max. and min. transmission             | 0.7461 and 0.5990                                                                                                                                      |
| Refinement method                      | Full-matrix least-squares on $F^2$                                                                                                                     |
| Data / restraints / parameters         | 3435 / 0 / 211                                                                                                                                         |
| Goodness-of-fit on $F^2$               | 1.172                                                                                                                                                  |
| Final R indices [ $I > 2\sigma(I)$ ]   | R1 = 0.0788, wR2 = 0.1756                                                                                                                              |
| R indices (all data)                   | R1 = 0.0857, wR2 = 0.1787                                                                                                                              |
| Absolute structure parameter           | 0.13(6)                                                                                                                                                |
| Extinction coefficient                 | n/a                                                                                                                                                    |
| Largest diff. peak and hole            | 0.538 and $-0.462 \text{ e.\AA}^{-3}$                                                                                                                  |

*(R<sub>S</sub>,S<sub>C</sub>,R<sub>S</sub>)-N-[1-(Phenylsulfinyl)-3-methylbut-2-yl]-2-methyl-2-propanesulfinamide, 9(R<sub>S</sub>,S<sub>C</sub>,R<sub>S</sub>)*

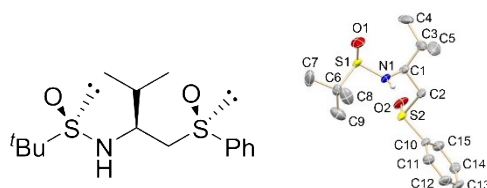

**Table S5. Crystal data and structure refinement for 9(*R<sub>S</sub>*,*S<sub>C</sub>*,*R<sub>S</sub>*).**

|                                      |                                                                  |                             |
|--------------------------------------|------------------------------------------------------------------|-----------------------------|
| Empirical formula                    | $C_{15}H_{25}NO_2S_2$                                            |                             |
| Formula weight                       | 315.48                                                           |                             |
| Temperature                          | 193(2) K                                                         |                             |
| Wavelength                           | 0.71073 Å                                                        |                             |
| Crystal system                       | Monoclinic                                                       |                             |
| Space group                          | $P2_1$                                                           |                             |
| Unit cell dimensions                 | $a = 5.7979(3)$ Å                                                | $\alpha = 90^\circ$ .       |
|                                      | $b = 11.3878(6)$ Å                                               | $\beta = 99.733(2)^\circ$ . |
|                                      | $c = 13.2360(7)$ Å                                               | $\gamma = 90^\circ$ .       |
| Volume                               | $861.33(8)$ Å <sup>3</sup>                                       |                             |
| Z                                    | 2                                                                |                             |
| Density (calculated)                 | 1.216 Mg/m <sup>3</sup>                                          |                             |
| Absorption coefficient               | 0.310 mm <sup>-1</sup>                                           |                             |
| F(000)                               | 340                                                              |                             |
| Crystal size                         | 0.400 x 0.250 x 0.200 mm <sup>3</sup>                            |                             |
| Theta range for data collection      | 3.565 to 25.248°.                                                |                             |
| Index ranges                         | $-6 \leq h \leq 6$ , $-13 \leq k \leq 11$ , $-14 \leq l \leq 15$ |                             |
| Reflections collected                | 7790                                                             |                             |
| Independent reflections              | 2369 [R(int) = 0.0198]                                           |                             |
| Completeness to theta = 25.242°      | 96.9 %                                                           |                             |
| Absorption correction                | Semi-empirical from equivalents                                  |                             |
| Max. and min. transmission           | 0.9405 and 0.8859                                                |                             |
| Refinement method                    | Full-matrix least-squares on F <sup>2</sup>                      |                             |
| Data / restraints / parameters       | 2369 / 2 / 189                                                   |                             |
| Goodness-of-fit on F <sup>2</sup>    | 1.092                                                            |                             |
| Final R indices [ $I > 2\sigma(I)$ ] | R1 = 0.0292, wR2 = 0.0728                                        |                             |
| R indices (all data)                 | R1 = 0.0315, wR2 = 0.0743                                        |                             |
| Absolute structure parameter         | 0.05(3)                                                          |                             |
| Extinction coefficient               | n/a                                                              |                             |
| Largest diff. peak and hole          | 0.253 and -0.174 e.Å <sup>-3</sup>                               |                             |

*(R<sub>S</sub>,S<sub>C</sub>,R<sub>S</sub>)-N-[1-(2-Naphthyl)-2-(tert-butylsulfinyl)ethyl]-2-methyl-2-propanesulfonamide, 10(R<sub>S</sub>,S<sub>C</sub>,R<sub>S</sub>)*

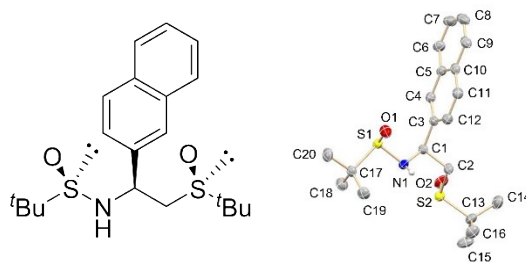

**Table S6. Crystal data and structure refinement for 10(R<sub>S</sub>,S<sub>C</sub>,R<sub>S</sub>).**

|                                 |                                                                |                 |
|---------------------------------|----------------------------------------------------------------|-----------------|
| Empirical formula               | C <sub>20</sub> H <sub>29</sub> NO <sub>2</sub> S <sub>2</sub> |                 |
| Formula weight                  | 379.56                                                         |                 |
| Temperature                     | 193(2) K                                                       |                 |
| Wavelength                      | 0.71073 Å                                                      |                 |
| Crystal system                  | Triclinic                                                      |                 |
| Space group                     | P1                                                             |                 |
| Unit cell dimensions            | a = 5.8277(6) Å                                                | α = 71.359(3)°. |
|                                 | b = 9.3792(9) Å                                                | β = 74.525(3)°. |
|                                 | c = 10.3043(10) Å                                              | γ = 75.502(3)°. |
| Volume                          | 505.86(9) Å <sup>3</sup>                                       |                 |
| Z                               | 1                                                              |                 |
| Density (calculated)            | 1.246 Mg/m <sup>3</sup>                                        |                 |
| Absorption coefficient          | 0.276 mm <sup>-1</sup>                                         |                 |
| F(000)                          | 204                                                            |                 |
| Crystal size                    | 0.300 x 0.200 x 0.100 mm <sup>3</sup>                          |                 |
| Theta range for data collection | 2.130 to 30.647°.                                              |                 |
| Index ranges                    | -8 ≤ h ≤ 8, -13 ≤ k ≤ 13, -14 ≤ l ≤ 14                         |                 |
| Reflections collected           | 26033                                                          |                 |
| Independent reflections         | 6101 [R(int) = 0.0401]                                         |                 |
| Completeness to theta = 25.242° | 99.9 %                                                         |                 |
| Absorption correction           | Semi-empirical from equivalents                                |                 |
| Max. and min. transmission      | 0.7461 and 0.6685                                              |                 |
| Refinement method               | Full-matrix least-squares on F <sup>2</sup>                    |                 |
| Data / restraints / parameters  | 6101 / 3 / 232                                                 |                 |

|                                      |                                       |
|--------------------------------------|---------------------------------------|
| Goodness-of-fit on $F^2$             | 1.072                                 |
| Final R indices [ $I > 2\sigma(I)$ ] | R1 = 0.0351, wR2 = 0.0859             |
| R indices (all data)                 | R1 = 0.0420, wR2 = 0.0916             |
| Absolute structure parameter         | 0.00(2)                               |
| Extinction coefficient               | n/a                                   |
| Largest diff. peak and hole          | 0.460 and -0.346 e. $\text{\AA}^{-3}$ |

*(R<sub>S</sub>,S<sub>C</sub>,S<sub>S</sub>)-N-[1-(2-Naphthyl)-2-(tert-butylsulfinyl)ethyl]-2-methyl-2-propanesulfonamide, 10(R<sub>S</sub>,S<sub>C</sub>,S<sub>S</sub>)*

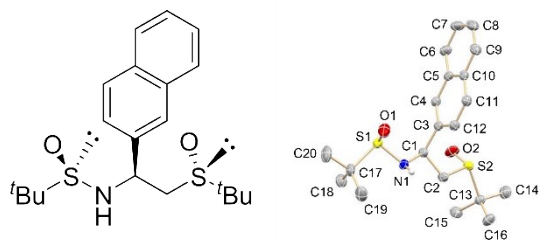

**Table S7. Crystal data and structure refinement for 10(R<sub>S</sub>,S<sub>C</sub>,S<sub>S</sub>).**

|                                 |                                                                |                  |
|---------------------------------|----------------------------------------------------------------|------------------|
| Empirical formula               | C <sub>20</sub> H <sub>29</sub> NO <sub>2</sub> S <sub>2</sub> |                  |
| Formula weight                  | 379.56                                                         |                  |
| Temperature                     | 193(2) K                                                       |                  |
| Wavelength                      | 0.71073 Å                                                      |                  |
| Crystal system                  | Monoclinic                                                     |                  |
| Space group                     | P2 <sub>1</sub>                                                |                  |
| Unit cell dimensions            | a = 6.0206(4) Å                                                | α = 90°.         |
|                                 | b = 18.0652(12) Å                                              | β = 100.221(3)°. |
|                                 | c = 9.4916(7) Å                                                | γ = 90°.         |
| Volume                          | 1015.96(12) Å <sup>3</sup>                                     |                  |
| Z                               | 2                                                              |                  |
| Density (calculated)            | 1.241 Mg/m <sup>3</sup>                                        |                  |
| Absorption coefficient          | 0.275 mm <sup>-1</sup>                                         |                  |
| F(000)                          | 408                                                            |                  |
| Crystal size                    | 0.500 x 0.200 x 0.100 mm <sup>3</sup>                          |                  |
| Theta range for data collection | 2.180 to 30.568°.                                              |                  |
| Index ranges                    | -8 ≤ h ≤ 8, -25 ≤ k ≤ 25, -13 ≤ l ≤ 13                         |                  |
| Reflections collected           | 26489                                                          |                  |

|                                   |                                             |
|-----------------------------------|---------------------------------------------|
| Independent reflections           | 6205 [R(int) = 0.0556]                      |
| Completeness to theta = 25.242°   | 100.0 %                                     |
| Absorption correction             | Semi-empirical from equivalents             |
| Max. and min. transmission        | 0.7461 and 0.6051                           |
| Refinement method                 | Full-matrix least-squares on F <sup>2</sup> |
| Data / restraints / parameters    | 6205 / 1 / 232                              |
| Goodness-of-fit on F <sup>2</sup> | 1.047                                       |
| Final R indices [I>2sigma(I)]     | R1 = 0.0318, wR2 = 0.0769                   |
| R indices (all data)              | R1 = 0.0355, wR2 = 0.0804                   |
| Absolute structure parameter      | 0.05(2)                                     |
| Extinction coefficient            | n/a                                         |
| Largest diff. peak and hole       | 0.245 and -0.290 e.Å <sup>-3</sup>          |

*(R<sub>S</sub>,S<sub>C</sub>,R<sub>S</sub>)-N-[2-(tert-butylsulfinyl)-1-phenylethyl]-2-methyl-2-propanesulfinamide, 11(R<sub>S</sub>,S<sub>C</sub>,R<sub>S</sub>)*

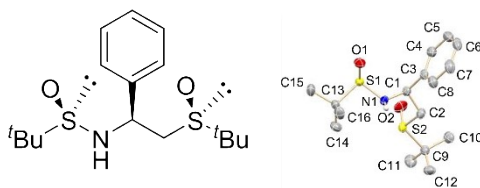

**Table S8. Crystal data and structure refinement for 11(R<sub>S</sub>,S<sub>C</sub>,R<sub>S</sub>).**

|                        |                                                                                                    |
|------------------------|----------------------------------------------------------------------------------------------------|
| Empirical formula      | C <sub>16</sub> H <sub>27</sub> NO <sub>2</sub> S <sub>2</sub>                                     |
| Formula weight         | 329.50                                                                                             |
| Temperature            | 193(2) K                                                                                           |
| Wavelength             | 0.71073 Å                                                                                          |
| Crystal system         | Orthorhombic                                                                                       |
| Space group            | P2 <sub>1</sub> 2 <sub>1</sub> 2 <sub>1</sub>                                                      |
| Unit cell dimensions   | a = 6.0077(3) Å      α = 90°.<br>b = 15.1960(7) Å      β = 90°.<br>c = 19.9670(12) Å      γ = 90°. |
| Volume                 | 1822.85(17) Å <sup>3</sup>                                                                         |
| Z                      | 4                                                                                                  |
| Density (calculated)   | 1.201 Mg/m <sup>3</sup>                                                                            |
| Absorption coefficient | 0.296 mm <sup>-1</sup>                                                                             |

|                                   |                                             |
|-----------------------------------|---------------------------------------------|
| F(000)                            | 712                                         |
| Crystal size                      | 0.500 x 0.300 x 0.200 mm <sup>3</sup>       |
| Theta range for data collection   | 2.441 to 30.528°.                           |
| Index ranges                      | -8<=h<=8, -21<=k<=21, -28<=l<=28            |
| Reflections collected             | 43624                                       |
| Independent reflections           | 5572 [R(int) = 0.0823]                      |
| Completeness to theta = 25.242°   | 99.9 %                                      |
| Absorption correction             | Semi-empirical from equivalents             |
| Max. and min. transmission        | 0.7461 and 0.5574                           |
| Refinement method                 | Full-matrix least-squares on F <sup>2</sup> |
| Data / restraints / parameters    | 5572 / 0 / 196                              |
| Goodness-of-fit on F <sup>2</sup> | 1.106                                       |
| Final R indices [I>2sigma(I)]     | R1 = 0.0354, wR2 = 0.0772                   |
| R indices (all data)              | R1 = 0.0494, wR2 = 0.0865                   |
| Absolute structure parameter      | -0.07(3)                                    |
| Extinction coefficient            | n/a                                         |
| Largest diff. peak and hole       | 0.295 and -0.303 e.Å <sup>-3</sup>          |

*(R<sub>S</sub>,S<sub>C</sub>,R<sub>S</sub>)-N-[1-(tert-butylsulfinyl)-3-methylbutan-2-yl]-2-methyl-2-propanesulfonamide, 12(R<sub>S</sub>,S<sub>C</sub>,R<sub>S</sub>)*

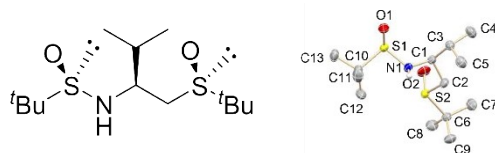

**Table S9. Crystal data and structure refinement for 12(R<sub>S</sub>,S<sub>C</sub>,R<sub>S</sub>).**

|                      |                                                                |
|----------------------|----------------------------------------------------------------|
| Empirical formula    | C <sub>13</sub> H <sub>29</sub> NO <sub>2</sub> S <sub>2</sub> |
| Formula weight       | 295.49                                                         |
| Temperature          | 193(2) K                                                       |
| Wavelength           | 0.71073 Å                                                      |
| Crystal system       | Orthorhombic                                                   |
| Space group          | P2 <sub>1</sub> 2 <sub>1</sub> 2 <sub>1</sub>                  |
| Unit cell dimensions | a = 6.0101(3) Å      α = 90°.                                  |
|                      | b = 14.6331(6) Å      β = 90°.                                 |
|                      | c = 19.1993(8) Å      γ = 90°.                                 |



|                                   |                                             |
|-----------------------------------|---------------------------------------------|
| Volume                            | 1688.51(13) Å <sup>3</sup>                  |
| Z                                 | 4                                           |
| Density (calculated)              | 1.162 Mg/m <sup>3</sup>                     |
| Absorption coefficient            | 0.312 mm <sup>-1</sup>                      |
| F(000)                            | 648                                         |
| Crystal size                      | 0.300 x 0.200 x 0.100 mm <sup>3</sup>       |
| Theta range for data collection   | 2.121 to 30.539°.                           |
| Index ranges                      | -8<=h<=8, -20<=k<=19, -27<=l<=27            |
| Reflections collected             | 39152                                       |
| Independent reflections           | 5146 [R(int) = 0.0784]                      |
| Completeness to theta = 25.242°   | 99.9 %                                      |
| Absorption correction             | Semi-empirical from equivalents             |
| Max. and min. transmission        | 0.7461 and 0.6466                           |
| Refinement method                 | Full-matrix least-squares on F <sup>2</sup> |
| Data / restraints / parameters    | 5146 / 1 / 174                              |
| Goodness-of-fit on F <sup>2</sup> | 1.103                                       |
| Final R indices [I>2sigma(I)]     | R1 = 0.0352, wR2 = 0.0726                   |
| R indices (all data)              | R1 = 0.0489, wR2 = 0.0804                   |
| Absolute structure parameter      | 0.02(3)                                     |
| Extinction coefficient            | n/a                                         |
| Largest diff. peak and hole       | 0.435 and -0.371 e.Å <sup>-3</sup>          |

*(R<sub>S</sub>,S<sub>C</sub>)-N-[2-(Tert-butylsulfonyl)-1-(2-naphthyl)ethyl]-2-methyl-2-propanesulfonamide, 21(R<sub>S</sub>,S<sub>C</sub>)*

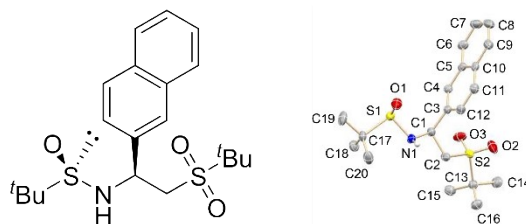

**Table S10. Crystal data and structure refinement for 21(R<sub>S</sub>,S<sub>C</sub>).**

|                   |                                                                |
|-------------------|----------------------------------------------------------------|
| Empirical formula | C <sub>20</sub> H <sub>29</sub> NO <sub>3</sub> S <sub>2</sub> |
| Formula weight    | 395.56                                                         |
| Temperature       | 193(2) K                                                       |
| Wavelength        | 0.71073 Å                                                      |

|                                   |                                             |                 |
|-----------------------------------|---------------------------------------------|-----------------|
| Crystal system                    | Monoclinic                                  |                 |
| Space group                       | P2 <sub>1</sub>                             |                 |
| Unit cell dimensions              | a = 6.0258(4) Å                             | α = 90°.        |
|                                   | b = 17.9919(12) Å                           | β = 99.556(2)°. |
|                                   | c = 9.5010(6) Å                             | γ = 90°.        |
| Volume                            | 1015.76(12) Å <sup>3</sup>                  |                 |
| Z                                 | 2                                           |                 |
| Density (calculated)              | 1.293 Mg/m <sup>3</sup>                     |                 |
| Absorption coefficient            | 0.281 mm <sup>-1</sup>                      |                 |
| F(000)                            | 424                                         |                 |
| Crystal size                      | 0.500 x 0.200 x 0.150 mm <sup>3</sup>       |                 |
| Theta range for data collection   | 2.174 to 30.518°.                           |                 |
| Index ranges                      | -8 ≤ h ≤ 6, -25 ≤ k ≤ 25, -13 ≤ l ≤ 13      |                 |
| Reflections collected             | 23525                                       |                 |
| Independent reflections           | 6169 [R(int) = 0.0612]                      |                 |
| Completeness to theta = 25.242°   | 99.9 %                                      |                 |
| Absorption correction             | Semi-empirical from equivalents             |                 |
| Max. and min. transmission        | 0.7461 and 0.5659                           |                 |
| Refinement method                 | Full-matrix least-squares on F <sup>2</sup> |                 |
| Data / restraints / parameters    | 6169 / 2 / 241                              |                 |
| Goodness-of-fit on F <sup>2</sup> | 1.068                                       |                 |
| Final R indices [I > 2σ(I)]       | R1 = 0.0437, wR2 = 0.0818                   |                 |
| R indices (all data)              | R1 = 0.0617, wR2 = 0.0907                   |                 |
| Absolute structure parameter      | 0.03(4)                                     |                 |
| Extinction coefficient            | n/a                                         |                 |
| Largest diff. peak and hole       | 0.453 and -0.408 e.Å <sup>-3</sup>          |                 |

## X-ray structure determination of selected complexes

*cis*-Dichloro[(*S<sub>C</sub>S<sub>S</sub>*)-1-(2-Naphthyl)-2-(phenylsulfinyl)ethylamine]palladium (II), **13**(*S<sub>C</sub>S<sub>S</sub>*)

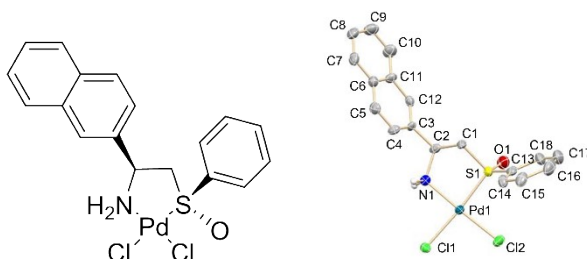

**Table S11. Crystal data and structure refinement for 13(*S<sub>C</sub>S<sub>S</sub>*).**

|                                 |                                                                                                             |
|---------------------------------|-------------------------------------------------------------------------------------------------------------|
| Empirical formula               | C <sub>18</sub> H <sub>17</sub> Cl <sub>2</sub> NOPdS                                                       |
| Formula weight                  | 472.68                                                                                                      |
| Temperature                     | 193(2) K                                                                                                    |
| Wavelength                      | 0.71073 Å                                                                                                   |
| Crystal system                  | Monoclinic                                                                                                  |
| Space group                     | P2 <sub>1</sub>                                                                                             |
| Unit cell dimensions            | a = 13.1185(13) Å      α = 90°.<br>b = 6.3138(9) Å      β = 114.291(7)°.<br>c = 13.7978(13) Å      γ = 90°. |
| Volume                          | 1041.7(2) Å <sup>3</sup>                                                                                    |
| Z                               | 2                                                                                                           |
| Density (calculated)            | 1.507 Mg/m <sup>3</sup>                                                                                     |
| Absorption coefficient          | 1.251 mm <sup>-1</sup>                                                                                      |
| F(000)                          | 472                                                                                                         |
| Crystal size                    | 0.400 x 0.050 x 0.030 mm <sup>3</sup>                                                                       |
| Theta range for data collection | 2.976 to 25.247°.                                                                                           |
| Index ranges                    | -15 ≤ h ≤ 15, -7 ≤ k ≤ 2, -16 ≤ l ≤ 16                                                                      |
| Reflections collected           | 5328                                                                                                        |
| Independent reflections         | 2071 [R(int) = 0.0320]                                                                                      |
| Completeness to theta = 25.242° | 91.6 %                                                                                                      |
| Absorption correction           | Semi-empirical from equivalents                                                                             |
| Max. and min. transmission      | 0.7461 and 0.5483                                                                                           |
| Refinement method               | Full-matrix least-squares on F <sup>2</sup>                                                                 |
| Data / restraints / parameters  | 2071 / 1 / 217                                                                                              |

|                                      |                                       |
|--------------------------------------|---------------------------------------|
| Goodness-of-fit on $F^2$             | 1.069                                 |
| Final R indices [ $I > 2\sigma(I)$ ] | $R_1 = 0.0338$ , $wR_2 = 0.0852$      |
| R indices (all data)                 | $R_1 = 0.0440$ , $wR_2 = 0.0884$      |
| Absolute structure parameter         | -0.02(6)                              |
| Extinction coefficient               | n/a                                   |
| Largest diff. peak and hole          | 0.672 and -0.488 e. $\text{\AA}^{-3}$ |

*cis*-Dichloro[( $S_C,R_S$ )-1-(2-Naphthyl)-2-(phenylsulfinyl)ethylamine]palladium (II), **13**( $S_C,R_S$ )

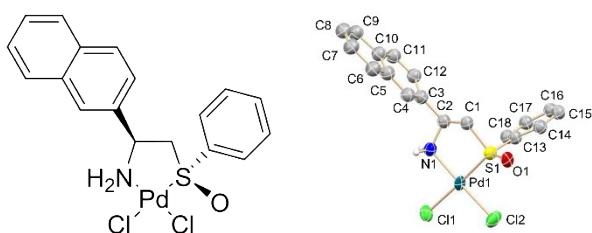

**Table S12. Crystal data and structure refinement for 13( $S_C,R_S$ ).**

|                                 |                                                                                                                                                                   |
|---------------------------------|-------------------------------------------------------------------------------------------------------------------------------------------------------------------|
| Empirical formula               | $C_{18}H_{17}Cl_2NOPdS$                                                                                                                                           |
| Formula weight                  | 472.68                                                                                                                                                            |
| Temperature                     | 193(2) K                                                                                                                                                          |
| Wavelength                      | 0.71073 $\text{\AA}$                                                                                                                                              |
| Crystal system                  | Monoclinic                                                                                                                                                        |
| Space group                     | $P2_1$                                                                                                                                                            |
| Unit cell dimensions            | $a = 12.6204(8) \text{\AA}$ $\alpha = 90^\circ$ .<br>$b = 6.6213(3) \text{\AA}$ $\beta = 95.562(3)^\circ$ .<br>$c = 22.7235(14) \text{\AA}$ $\gamma = 90^\circ$ . |
| Volume                          | 1889.91(19) $\text{\AA}^3$                                                                                                                                        |
| Z                               | 4                                                                                                                                                                 |
| Density (calculated)            | 1.661 $\text{Mg/m}^3$                                                                                                                                             |
| Absorption coefficient          | 1.379 $\text{mm}^{-1}$                                                                                                                                            |
| F(000)                          | 944                                                                                                                                                               |
| Crystal size                    | 0.400 x 0.100 x 0.050 $\text{mm}^3$                                                                                                                               |
| Theta range for data collection | 2.538 to 25.243 $^\circ$ .                                                                                                                                        |
| Index ranges                    | -14 $\leq h \leq$ 12, -7 $\leq k \leq$ 7, -27 $\leq l \leq$ 26                                                                                                    |
| Reflections collected           | 17292                                                                                                                                                             |
| Independent reflections         | 4598 [ $R(\text{int}) = 0.0354$ ]                                                                                                                                 |

|                                   |                                             |
|-----------------------------------|---------------------------------------------|
| Completeness to theta = 25.242°   | 79.4 %                                      |
| Absorption correction             | Semi-empirical from equivalents             |
| Max. and min. transmission        | 0.7461 and 0.5483                           |
| Refinement method                 | Full-matrix least-squares on F <sup>2</sup> |
| Data / restraints / parameters    | 4598 / 553 / 433                            |
| Goodness-of-fit on F <sup>2</sup> | 1.090                                       |
| Final R indices [I>2sigma(I)]     | R1 = 0.0594, wR2 = 0.1306                   |
| R indices (all data)              | R1 = 0.0713, wR2 = 0.1350                   |
| Absolute structure parameter      | 0.09(3)                                     |
| Extinction coefficient            | n/a                                         |
| Largest diff. peak and hole       | 1.077 and -1.851 e.Å <sup>-3</sup>          |

*cis*-Dichloro[(*S<sub>C</sub>R<sub>S</sub>*)-1-(Phenyl)-2-(phenylsulfinyl)ethylamine]palladium (II), **14**(*S<sub>C</sub>R<sub>S</sub>*)

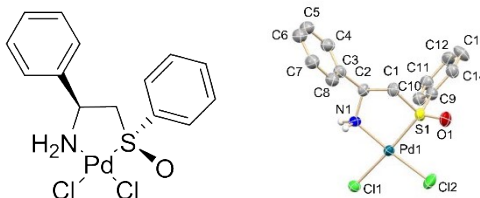

**Table S13. Crystal data and structure refinement for 14(*S<sub>C</sub>R<sub>S</sub>*).**

|                        |                                                                                             |
|------------------------|---------------------------------------------------------------------------------------------|
| Empirical formula      | C <sub>14</sub> H <sub>15</sub> Cl <sub>2</sub> NOPdS                                       |
| Formula weight         | 422.63                                                                                      |
| Temperature            | 193(2) K                                                                                    |
| Wavelength             | 0.71073 Å                                                                                   |
| Crystal system         | Orthorhombic                                                                                |
| Space group            | P2 <sub>1</sub> 2 <sub>1</sub> 2 <sub>1</sub>                                               |
| Unit cell dimensions   | a = 6.148(2) Å      α = 90°<br>b = 13.389(4) Å      β = 90°<br>c = 20.420(6) Å      γ = 90° |
| Volume                 | 1680.9(9) Å <sup>3</sup>                                                                    |
| Z                      | 4                                                                                           |
| Density (calculated)   | 1.670 Mg/m <sup>3</sup>                                                                     |
| Absorption coefficient | 1.540 mm <sup>-1</sup>                                                                      |
| F(000)                 | 840                                                                                         |

|                                   |                                             |
|-----------------------------------|---------------------------------------------|
| Crystal size                      | 0.200 x 0.050 x 0.020 mm <sup>3</sup>       |
| Theta range for data collection   | 1.995 to 25.248°.                           |
| Index ranges                      | -7<=h<=7, -15<=k<=15, -24<=l<=22            |
| Reflections collected             | 8066                                        |
| Independent reflections           | 3004 [R(int) = 0.0639]                      |
| Completeness to theta = 25.242°   | 99.3 %                                      |
| Absorption correction             | Semi-empirical from equivalents             |
| Max. and min. transmission        | 0.7454 and 0.6030                           |
| Refinement method                 | Full-matrix least-squares on F <sup>2</sup> |
| Data / restraints / parameters    | 3004 / 131 / 181                            |
| Goodness-of-fit on F <sup>2</sup> | 1.091                                       |
| Final R indices [I>2sigma(I)]     | R1 = 0.0578, wR2 = 0.1222                   |
| R indices (all data)              | R1 = 0.0836, wR2 = 0.1292                   |
| Absolute structure parameter      | 0.06(4)                                     |
| Extinction coefficient            | n/a                                         |
| Largest diff. peak and hole       | 1.183 and -1.218 e.Å <sup>-3</sup>          |

*cis*-Dichloro[(*S<sub>C</sub>R<sub>S</sub>*)-3-methyl-1-(phenylsulfinyl)-2-butylamine]palladium (II), **15**(*S<sub>C</sub>R<sub>S</sub>*)

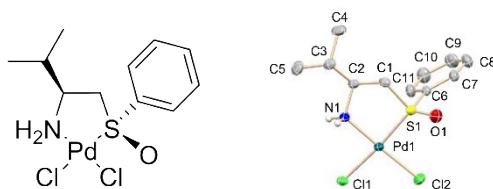

**Table S14. Crystal data and structure refinement for 15(*S<sub>C</sub>R<sub>S</sub>*).**

|                      |                                                       |
|----------------------|-------------------------------------------------------|
| Empirical formula    | C <sub>11</sub> H <sub>17</sub> Cl <sub>2</sub> NOPdS |
| Formula weight       | 388.61                                                |
| Temperature          | 193(2) K                                              |
| Wavelength           | 0.71073 Å                                             |
| Crystal system       | Orthorhombic                                          |
| Space group          | P2 <sub>1</sub> 2 <sub>1</sub> 2 <sub>1</sub>         |
| Unit cell dimensions | a = 8.1116(5) Å      α = 90°.                         |
|                      | b = 12.0151(7) Å      β = 90°.                        |
|                      | c = 14.6744(7) Å      γ = 90°.                        |
| Volume               | 1430.19(14) Å <sup>3</sup>                            |

|                                   |                                             |
|-----------------------------------|---------------------------------------------|
| Z                                 | 4                                           |
| Density (calculated)              | 1.805 Mg/m <sup>3</sup>                     |
| Absorption coefficient            | 1.800 mm <sup>-1</sup>                      |
| F(000)                            | 776                                         |
| Crystal size                      | 0.200 x 0.050 x 0.030 mm <sup>3</sup>       |
| Theta range for data collection   | 2.191 to 30.539°.                           |
| Index ranges                      | -11<=h<=11, -17<=k<=17, -20<=l<=20          |
| Reflections collected             | 27751                                       |
| Independent reflections           | 4379 [R(int) = 0.0497]                      |
| Completeness to theta = 25.242°   | 100.0 %                                     |
| Absorption correction             | Semi-empirical from equivalent              |
| Max. and min. transmission        | 0.7461 and 0.6498                           |
| Refinement method                 | Full-matrix least-squares on F <sup>2</sup> |
| Data / restraints / parameters    | 4379 / 0 / 156                              |
| Goodness-of-fit on F <sup>2</sup> | 1.073                                       |
| Final R indices [I>2sigma(I)]     | R1 = 0.0261, wR2 = 0.0472                   |
| R indices (all data)              | R1 = 0.0301, wR2 = 0.0484                   |
| Absolute structure parameter      | -0.003(18)                                  |
| Extinction coefficient            | n/a                                         |
| Largest diff. peak and hole       | 0.368 and -0.780 e.Å <sup>-3</sup>          |

*cis*-Dichloro[(*S<sub>C</sub>R<sub>S</sub>*)-1-(2-Naphthyl)-2-(*tert*-butylsulfinyl)ethylamine]palladium (II), **16**(*S<sub>C</sub>R<sub>S</sub>*)

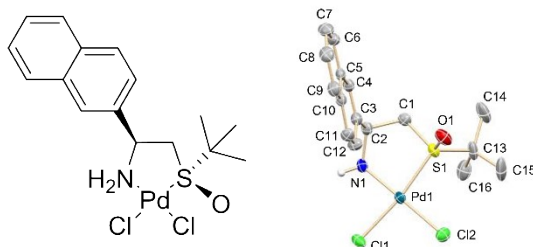

**Table S15. Crystal data and structure refinement for 16(*S<sub>C</sub>R<sub>S</sub>*).**

|                   |                                                       |
|-------------------|-------------------------------------------------------|
| Empirical formula | C <sub>16</sub> H <sub>21</sub> Cl <sub>2</sub> NOPdS |
| Formula weight    | 452.70                                                |
| Temperature       | 193(2) K                                              |

|                                   |                                               |          |
|-----------------------------------|-----------------------------------------------|----------|
| Wavelength                        | 0.71073 Å                                     |          |
| Crystal system                    | Orthorhombic                                  |          |
| Space group                       | P2 <sub>1</sub> 2 <sub>1</sub> 2 <sub>1</sub> |          |
| Unit cell dimensions              | a = 5.8774(5) Å                               | α = 90°. |
|                                   | b = 12.2061(9) Å                              | β = 90°. |
|                                   | c = 24.8164(16) Å                             | γ = 90°. |
| Volume                            | 1780.3(2) Å <sup>3</sup>                      |          |
| Z                                 | 4                                             |          |
| Density (calculated)              | 1.689 Mg/m <sup>3</sup>                       |          |
| Absorption coefficient            | 1.460 mm <sup>-1</sup>                        |          |
| F(000)                            | 912                                           |          |
| Crystal size                      | 0.500 x 0.100 x 0.050 mm <sup>3</sup>         |          |
| Theta range for data collection   | 2.341 to 30.555°.                             |          |
| Index ranges                      | -8 ≤ h ≤ 8, -17 ≤ k ≤ 17, -35 ≤ l ≤ 34        |          |
| Reflections collected             | 29285                                         |          |
| Independent reflections           | 5447 [R(int) = 0.0930]                        |          |
| Completeness to theta = 25.242°   | 99.6 %                                        |          |
| Absorption correction             | Semi-empirical from equivalents               |          |
| Max. and min. transmission        | 0.7461 and 0.5061                             |          |
| Refinement method                 | Full-matrix least-squares on F <sup>2</sup>   |          |
| Data / restraints / parameters    | 5447 / 0 / 202                                |          |
| Goodness-of-fit on F <sup>2</sup> | 1.053                                         |          |
| Final R indices [I > 2σ(I)]       | R1 = 0.0408, wR2 = 0.0951                     |          |
| R indices (all data)              | R1 = 0.0482, wR2 = 0.1009                     |          |
| Absolute structure parameter      | 0.04(3)                                       |          |
| Extinction coefficient            | n/a                                           |          |
| Largest diff. peak and hole       | 0.931 and -1.630 e.Å <sup>-3</sup>            |          |



*cis*-Dichloro[(*S<sub>C</sub>S<sub>S</sub>*)-2-(*tert*-butylsulfinyl)-1-(phenyl)ethylamine]palladium (II), **17**(*S<sub>C</sub>S<sub>S</sub>*)

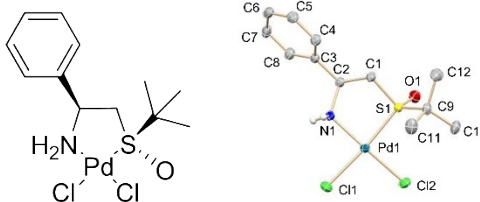

**Table S16. Crystal data and structure refinement for 17(*S<sub>C</sub>S<sub>S</sub>*).**

|                                   |                                                       |          |
|-----------------------------------|-------------------------------------------------------|----------|
| Empirical formula                 | C <sub>12</sub> H <sub>19</sub> Cl <sub>2</sub> NOPdS |          |
| Formula weight                    | 402.64                                                |          |
| Temperature                       | 193(2) K                                              |          |
| Wavelength                        | 0.71073 Å                                             |          |
| Crystal system                    | Orthorhombic                                          |          |
| Space group                       | P2 <sub>1</sub> 2 <sub>1</sub> 2 <sub>1</sub>         |          |
| Unit cell dimensions              | a = 9.7251(3) Å                                       | α = 90°. |
|                                   | b = 11.3374(3) Å                                      | β = 90°. |
|                                   | c = 14.2512(4) Å                                      | γ = 90°. |
| Volume                            | 1571.30(8) Å <sup>3</sup>                             |          |
| Z                                 | 4                                                     |          |
| Density (calculated)              | 1.702 Mg/m <sup>3</sup>                               |          |
| Absorption coefficient            | 1.642 mm <sup>-1</sup>                                |          |
| F(000)                            | 808                                                   |          |
| Crystal size                      | 0.300 x 0.100 x 0.050 mm <sup>3</sup>                 |          |
| Theta range for data collection   | 2.296 to 30.503°.                                     |          |
| Index ranges                      | -13 ≤ h ≤ 13, -16 ≤ k ≤ 16, -20 ≤ l ≤ 20              |          |
| Reflections collected             | 33427                                                 |          |
| Independent reflections           | 4798 [R(int) = 0.0315]                                |          |
| Completeness to theta = 25.242°   | 99.9 %                                                |          |
| Absorption correction             | Semi-empirical from equivalents                       |          |
| Max. and min. transmission        | 0.7461 and 0.6387                                     |          |
| Refinement method                 | Full-matrix least-squares on F <sup>2</sup>           |          |
| Data / restraints / parameters    | 4798 / 0 / 166                                        |          |
| Goodness-of-fit on F <sup>2</sup> | 1.104                                                 |          |
| Final R indices [I > 2σ(I)]       | R1 = 0.0169, wR2 = 0.0392                             |          |

|                              |                                    |
|------------------------------|------------------------------------|
| R indices (all data)         | R1 = 0.0184, wR2 = 0.0403          |
| Absolute structure parameter | 0.006(9)                           |
| Extinction coefficient       | n/a                                |
| Largest diff. peak and hole  | 0.385 and -0.580 e.Å <sup>-3</sup> |

*cis*-Dichloro[(*S<sub>C</sub>S<sub>S</sub>*)-1-(*tert*-butylsulfinyl)-3-methyl-2-butylamine]palladium (II), **18**(*S<sub>C</sub>S<sub>S</sub>*)

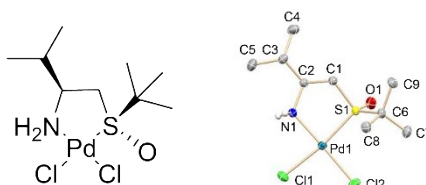

**Table 17. Crystal data and structure refinement for 18(*S<sub>C</sub>S<sub>S</sub>*).**

|                                 |                                                                                                   |
|---------------------------------|---------------------------------------------------------------------------------------------------|
| Empirical formula               | C <sub>9</sub> H <sub>21</sub> Cl <sub>2</sub> NOPdS                                              |
| Formula weight                  | 368.63                                                                                            |
| Temperature                     | 193(2) K                                                                                          |
| Wavelength                      | 0.71073 Å                                                                                         |
| Crystal system                  | Orthorhombic                                                                                      |
| Space group                     | P2 <sub>1</sub> 2 <sub>1</sub> 2 <sub>1</sub>                                                     |
| Unit cell dimensions            | a = 8.5540(4) Å      α = 90°.<br>b = 10.1169(4) Å      β = 90°.<br>c = 16.2154(7) Å      γ = 90°. |
| Volume                          | 1403.28(11) Å <sup>3</sup>                                                                        |
| Z                               | 4                                                                                                 |
| Density (calculated)            | 1.745 Mg/m <sup>3</sup>                                                                           |
| Absorption coefficient          | 1.829 mm <sup>-1</sup>                                                                            |
| F(000)                          | 744                                                                                               |
| Crystal size                    | 0.500 x 0.300 x 0.200 mm <sup>3</sup>                                                             |
| Theta range for data collection | 2.512 to 30.538°.                                                                                 |
| Index ranges                    | -11 ≤ h ≤ 12, -14 ≤ k ≤ 14, -23 ≤ l ≤ 22                                                          |
| Reflections collected           | 30895                                                                                             |
| Independent reflections         | 4283 [R(int) = 0.0329]                                                                            |
| Completeness to theta = 25.242° | 99.8 %                                                                                            |
| Absorption correction           | Semi-empirical from equivalents                                                                   |
| Max. and min. transmission      | 0.7461 and 0.5458                                                                                 |

|                                      |                                             |
|--------------------------------------|---------------------------------------------|
| Refinement method                    | Full-matrix least-squares on F <sup>2</sup> |
| Data / restraints / parameters       | 4283 / 0 / 141                              |
| Goodness-of-fit on F <sup>2</sup>    | 1.080                                       |
| Final R indices [ $I > 2\sigma(I)$ ] | R1 = 0.0151, wR2 = 0.0357                   |
| R indices (all data)                 | R1 = 0.0160, wR2 = 0.0362                   |
| Absolute structure parameter         | -0.008(9)                                   |
| Extinction coefficient               | n/a                                         |
| Largest diff. peak and hole          | 0.240 and -0.496 e.Å <sup>-3</sup>          |

## References

1. Fernández, I.; Khiar, N.; Llera, J.M.; Alcudia, F. Asymmetric synthesis of alkane- and arenesulfinates of diacetone-D-glucose (DAG): an improved and general route to both enantiomerically pure sulfoxides. *J. Org. Chem.* **1992**, *57*, 6789-6796.
2. Borrego, L. G.; Recio, R.; Álvarez, E.; Sánchez-Coronilla, A.; Khiar, N.; Fernández, I. Steric Tuning of Sulfinamide/Sulfoxides as Chiral Ligands with C1, Pseudo-meso, and Pseudo-C2 Symmetries: Application in Rhodium(I)-Mediated Arylation. *Org. Lett.* **2019**, *21*, 6513-6518.
3. Jin, L.-M.; Lu, H.; Cui, Y.; Lizardi, C. L.; Arzua, T. N.; Wojtas, L.; Cui, X.; Zhang, X. P. Selective radical amination of aldehydic C(sp<sup>2</sup>)-H bonds with fluoroaryl azides via Co(II)-based metalloradical catalysis: synthesis of *N*-fluoroaryl amides from aldehydes under neutral and nonoxidative conditions. *Chem. Sci.* **2014**, *5*, 2422-2427.
4. Jerhaoui, S.; Djukic, J.-P.; Wencel-Delord, J.; Colobert, F. Asymmetric, nearly barrierless C(sp<sup>3</sup>)-H activation promoted by easily-accessible *N*-protected aminosulfoxides as new chiral ligands. *ACS Catal.* **2019**, *9*, 2532-2542.
5. Bruker. SAINT APEX2 2007; Bruker AXS Inc.: Madison, WI, USA, 2007.
6. Sheldrick, G.M. SADABS, Programs for Scaling and Absorption Correction of Area Detector Data 1997; University of Göttingen: Göttingen, Germany, 1997.
7. Burla, M.C.; Camalli, M.; Carrozzini, B.; Cascarano, G.L.; Giacovazzo, C.; Polidori, G.; Spagna, R. SIR2002: The Program. *J. Appl. Cryst.* **2003**, *36*, 1103.
8. Sheldrick, G.M. A Short History of SHELX. *Acta Cryst.* **2008**, *A64*, 112-122.
9. Sheldrick, G.M. SHELXT-Integrated space-group and crystal-structure determination. *Acta Cryst.* **2015**, *A71*, 3-8.
10. Sluis, P. v.d.; Spek, A. L. *Acta Crystallogr., Sect. A* **1990**, *46*, 194-201.
